# Supplementary material for: Clustered gamma-protocadherins regulate cortical interneuron programmed cell death
Source: eLife. 2020 Jul 7;9:e55374. doi: 10.7554/eLife.55374 (PMC7373431; doi:10.7554/eLife.55374)
Supplement: Figure 1—source data 1. [file elife-55374-fig1-data1.xlsx]

## Sheet: Figure 1 C raw data
Figure 1 source source data. CT values for qPCR reactions of Pcdhs
Experiment: Spatazza_14-12-15 Selected Filter: SYBR Green I / HRM Dye (465-510)
Include	Color	Pos	Name	Cp	Concentration	Standard	Status
TRUE	65280	A1	Sample 1			0
TRUE	65280	A2	Sample 2			0				Legend:
TRUE	65280	A3	Sample 3			0				Ct (cp) = cycle threshold (crossing point)
TRUE	65280	A4	Sample 4			0				empty Cp values = empty wells
TRUE	65280	A5	Sample 5			0				pos = position of reaction on the qPCR plate
TRUE	65280	A6	Sample 6			0
TRUE	65280	A7	Sample 7			0
TRUE	65280	A8	Sample 8			0
TRUE	65280	A9	Sample 9			0
TRUE	65280	A10	Sample 10			0
TRUE	65280	A11	Sample 11			0
TRUE	65280	A12	Sample 12			0
TRUE	65280	A13	Sample 13			0
TRUE	65280	A14	Sample 14			0
TRUE	65280	A15	Sample 15			0
TRUE	65280	A16	Sample 16			0
TRUE	65280	A17	Sample 17			0
TRUE	65280	A18	Sample 18			0
TRUE	65280	A19	Sample 19			0
TRUE	65280	A20	Sample 20			0
TRUE	65280	A21	Sample 21			0
TRUE	65280	A22	Sample 22			0
TRUE	65280	A23	Sample 23			0
TRUE	65280	A24	Sample 24			0
TRUE	65280	B1	Sample 25			0
TRUE	255	B2	Sample 26	23.63		0
TRUE	255	B3	Sample 27	23.6		0
TRUE	255	B4	Sample 28	23.6		0
TRUE	255	B5	Sample 29	28.17		0
TRUE	255	B6	Sample 30	28.22		0
TRUE	255	B7	Sample 31	28.91		0
TRUE	255	B8	Sample 32	28.54		0
TRUE	255	B9	Sample 33	28.6		0
TRUE	255	B10	Sample 34	28.66		0
TRUE	255	B11	Sample 35	32.57		0
TRUE	255	B12	Sample 36	32.6		0
TRUE	255	B13	Sample 37	32.66		0
TRUE	255	B14	Sample 38	32.43		0
TRUE	255	B15	Sample 39	32.72		0
TRUE	255	B16	Sample 40	32.65		0
TRUE	255	B17	Sample 41	32.72		0
TRUE	65280	B18	Sample 42			0
TRUE	65280	B19	Sample 43			0
TRUE	65280	B20	Sample 44			0
TRUE	65280	B21	Sample 45			0
TRUE	255	B22	Sample 46	27.16		0
TRUE	255	B23	Sample 47	27.13		0
TRUE	65280	B24	Sample 48			0
TRUE	65280	C1	Sample 49			0
TRUE	255	C2	Sample 50	22.27		0
TRUE	255	C3	Sample 51	22.3		0
TRUE	255	C4	Sample 52	22.24		0
TRUE	255	C5	Sample 53	27.1		0
TRUE	255	C6	Sample 54	27.02		0
TRUE	255	C7	Sample 55	27.12		0
TRUE	255	C8	Sample 56	27.09		0
TRUE	255	C9	Sample 57	27.07		0
TRUE	255	C10	Sample 58	27.07		0
TRUE	255	C11	Sample 59	30.99		0
TRUE	255	C12	Sample 60	30.93		0
TRUE	255	C13	Sample 61	30.93		0
TRUE	255	C14	Sample 62	31.22		0
TRUE	255	C15	Sample 63	30.73		0
TRUE	255	C16	Sample 64	30.98		0
TRUE	255	C17	Sample 65	32.84		0
TRUE	65280	C18	Sample 66			0
TRUE	255	C19	Sample 67	45		0	> - Late Cp call (last five cycles) has higher uncertainty
TRUE	65280	C20	Sample 68			0
TRUE	255	C21	Sample 69	45		0	> - Late Cp call (last five cycles) has higher uncertainty
TRUE	255	C22	Sample 70	25.98		0
TRUE	255	C23	Sample 71	25.94		0
TRUE	65280	C24	Sample 72			0
TRUE	65280	D1	Sample 73			0
TRUE	255	D2	Sample 74	21.49		0
TRUE	255	D3	Sample 75	21.5		0
TRUE	255	D4	Sample 76	21.46		0
TRUE	255	D5	Sample 77	27.61		0
TRUE	255	D6	Sample 78	27.68		0
TRUE	255	D7	Sample 79	27.61		0
TRUE	255	D8	Sample 80	26.43		0
TRUE	255	D9	Sample 81	26.46		0
TRUE	255	D10	Sample 82	26.24		0
TRUE	255	D11	Sample 83	29.63		0
TRUE	255	D12	Sample 84	29.71		0
TRUE	255	D13	Sample 85	29.74		0
TRUE	255	D14	Sample 86	30.65		0
TRUE	255	D15	Sample 87	30.31		0
TRUE	255	D16	Sample 88	30.53		0
TRUE	65280	D17	Sample 89			0
TRUE	65280	D18	Sample 90			0
TRUE	255	D19	Sample 91	45		0	> - Late Cp call (last five cycles) has higher uncertainty
TRUE	65280	D20	Sample 92			0
TRUE	65280	D21	Sample 93			0
TRUE	255	D22	Sample 94	24.29		0
TRUE	255	D23	Sample 95	24.41		0
TRUE	65280	D24	Sample 96			0
TRUE	65280	E1	Sample 97			0
TRUE	255	E2	Sample 98	27.05		0
TRUE	255	E3	Sample 99	26.96		0
TRUE	255	E4	Sample 100	26.85		0
TRUE	255	E5	Sample 101	31.5		0
TRUE	255	E6	Sample 102	32.6		0
TRUE	255	E7	Sample 103	32		0
TRUE	255	E8	Sample 104	30.68		0
TRUE	255	E9	Sample 105	30.35		0
TRUE	255	E10	Sample 106	30.45		0
TRUE	255	E11	Sample 107	32.83		0
TRUE	255	E12	Sample 108	33.24		0
TRUE	255	E13	Sample 109	33.47		0
TRUE	255	E14	Sample 110	33.68		0
TRUE	255	E15	Sample 111	33.9		0
TRUE	255	E16	Sample 112	34.8		0
TRUE	255	E17	Sample 113	45		0	> - Late Cp call (last five cycles) has higher uncertainty
TRUE	65280	E18	Sample 114			0
TRUE	65280	E19	Sample 115			0
TRUE	65280	E20	Sample 116			0
TRUE	65280	E21	Sample 117			0
TRUE	255	E22	Sample 118	28.12		0
TRUE	255	E23	Sample 119	28.43		0
TRUE	65280	E24	Sample 120			0
TRUE	65280	F1	Sample 121			0
TRUE	255	F2	Sample 122	26.77		0
TRUE	255	F3	Sample 123	26.57		0
TRUE	255	F4	Sample 124	26.62		0
TRUE	255	F5	Sample 125	33		0
TRUE	255	F6	Sample 126	31.55		0
TRUE	255	F7	Sample 127	31.77		0
TRUE	255	F8	Sample 128	30.56		0
TRUE	255	F9	Sample 129	30.74		0
TRUE	255	F10	Sample 130	30.67		0
TRUE	255	F11	Sample 131	32.68		0
TRUE	255	F12	Sample 132	32.32		0
TRUE	255	F13	Sample 133	32.08		0
TRUE	255	F14	Sample 134	34.42		0
TRUE	255	F15	Sample 135	34.61		0
TRUE	255	F16	Sample 136	35.48		0
TRUE	65280	F17	Sample 137			0
TRUE	65280	F18	Sample 138			0
TRUE	65280	F19	Sample 139			0
TRUE	65280	F20	Sample 140			0
TRUE	65280	F21	Sample 141			0
TRUE	255	F22	Sample 142	27.44		0
TRUE	255	F23	Sample 143	27.57		0
TRUE	65280	F24	Sample 144			0
TRUE	65280	G1	Sample 145			0
TRUE	255	G2	Sample 146	28.2		0
TRUE	255	G3	Sample 147	29.75		0
TRUE	255	G4	Sample 148	29.65		0
TRUE	255	G5	Sample 149	34.86		0
TRUE	255	G6	Sample 150	36.59		0
TRUE	255	G7	Sample 151	36.59		0
TRUE	255	G8	Sample 152	34.83		0
TRUE	255	G9	Sample 153	36.65		0
TRUE	255	G10	Sample 154	35.97		0
TRUE	255	G11	Sample 155	34.87		0
TRUE	255	G12	Sample 156	35.86		0
TRUE	255	G13	Sample 157	34.44		0
TRUE	65280	G14	Sample 158			0
TRUE	65280	G15	Sample 159			0
TRUE	255	G16	Sample 160	36.56		0
TRUE	65280	G17	Sample 161			0
TRUE	65280	G18	Sample 162			0
TRUE	65280	G19	Sample 163			0
TRUE	65280	G20	Sample 164			0
TRUE	65280	G21	Sample 165			0
TRUE	255	G22	Sample 166	30.85		0
TRUE	255	G23	Sample 167	30.64		0
TRUE	65280	G24	Sample 168			0
TRUE	65280	H1	Sample 169			0
TRUE	255	H2	Sample 170	32.05		0
TRUE	255	H3	Sample 171	32.6		0
TRUE	255	H4	Sample 172	31.69		0
TRUE	255	H5	Sample 173	30.99		0
TRUE	255	H6	Sample 174	31.52		0
TRUE	255	H7	Sample 175	30.9		0
TRUE	255	H8	Sample 176	31.16		0
TRUE	255	H9	Sample 177	30.64		0
TRUE	255	H10	Sample 178	31.01		0
TRUE	255	H11	Sample 179	30.63		0
TRUE	255	H12	Sample 180	30.53		0
TRUE	255	H13	Sample 181	30.54		0
TRUE	255	H14	Sample 182	31.73		0
TRUE	255	H15	Sample 183	31.85		0
TRUE	255	H16	Sample 184	31.79		0
TRUE	255	H17	Sample 185	35.08		0
TRUE	65280	H18	Sample 186			0
TRUE	255	H19	Sample 187	31.71		0
TRUE	65280	H20	Sample 188			0
TRUE	255	H21	Sample 189	37.08		0
TRUE	65280	H22	Sample 190			0
TRUE	65280	H23	Sample 191			0
TRUE	65280	H24	Sample 192			0
TRUE	65280	I1	Sample 193			0
TRUE	255	I2	Sample 194	30.7		0
TRUE	255	I3	Sample 195	30.78		0
TRUE	255	I4	Sample 196	30.85		0
TRUE	255	I5	Sample 197	29.5		0
TRUE	255	I6	Sample 198	29.32		0
TRUE	255	I7	Sample 199	29.71		0
TRUE	255	I8	Sample 200	30.28		0
TRUE	255	I9	Sample 201	30.42		0
TRUE	255	I10	Sample 202	30.7		0
TRUE	255	I11	Sample 203	29.15		0
TRUE	255	I12	Sample 204	29.11		0
TRUE	255	I13	Sample 205	29.18		0
TRUE	255	I14	Sample 206	30.51		0
TRUE	255	I15	Sample 207	30.55		0
TRUE	255	I16	Sample 208	30.27		0
TRUE	255	I17	Sample 209	35.62		0
TRUE	255	I18	Sample 210	45		0	> - Late Cp call (last five cycles) has higher uncertainty
TRUE	255	I19	Sample 211	31.12		0
TRUE	65280	I20	Sample 212			0
TRUE	255	I21	Sample 213	37.61		0
TRUE	65280	I22	Sample 214			0
TRUE	65280	I23	Sample 215			0
TRUE	65280	I24	Sample 216			0
TRUE	65280	J1	Sample 217			0
TRUE	255	J2	Sample 218	30.29		0
TRUE	255	J3	Sample 219	29.93		0
TRUE	255	J4	Sample 220	30.05		0
TRUE	255	J5	Sample 221	29.19		0
TRUE	255	J6	Sample 222	29.46		0
TRUE	255	J7	Sample 223	29.54		0
TRUE	255	J8	Sample 224	30.11		0
TRUE	255	J9	Sample 225	30.22		0
TRUE	255	J10	Sample 226	30.32		0
TRUE	255	J11	Sample 227	29.21		0
TRUE	255	J12	Sample 228	29.63		0
TRUE	255	J13	Sample 229	29.56		0
TRUE	255	J14	Sample 230	30.52		0
TRUE	255	J15	Sample 231	30.63		0
TRUE	255	J16	Sample 232	30.3		0
TRUE	255	J17	Sample 233	34.08		0
TRUE	255	J18	Sample 234	42.36		0
TRUE	255	J19	Sample 235	31.84		0
TRUE	65280	J20	Sample 236			0
TRUE	255	J21	Sample 237	35.92		0
TRUE	65280	J22	Sample 238			0
TRUE	65280	J23	Sample 239			0
TRUE	65280	J24	Sample 240			0
TRUE	65280	K1	Sample 241			0
TRUE	255	K2	Sample 242	33		0
TRUE	255	K3	Sample 243	33.72		0
TRUE	255	K4	Sample 244	33.88		0
TRUE	255	K5	Sample 245	33.62		0
TRUE	255	K6	Sample 246	32.27		0
TRUE	255	K7	Sample 247	33.97		0
TRUE	255	K8	Sample 248	31.73		0
TRUE	255	K9	Sample 249	31.34		0
TRUE	255	K10	Sample 250	31.73		0
TRUE	255	K11	Sample 251	33.74		0
TRUE	255	K12	Sample 252	32.92		0
TRUE	255	K13	Sample 253	33.83		0
TRUE	255	K14	Sample 254	34.47		0
TRUE	255	K15	Sample 255	36		0
TRUE	255	K16	Sample 256	34.22		0
TRUE	255	K17	Sample 257	34.34		0
TRUE	255	K18	Sample 258	37.92		0
TRUE	255	K19	Sample 259	31.23		0
TRUE	65280	K20	Sample 260			0
TRUE	255	K21	Sample 261	37.15		0
TRUE	65280	K22	Sample 262			0
TRUE	65280	K23	Sample 263			0
TRUE	65280	K24	Sample 264			0
TRUE	65280	L1	Sample 265			0
TRUE	255	L2	Sample 266	34.7		0
TRUE	255	L3	Sample 267	33.32		0
TRUE	255	L4	Sample 268	34.06		0
TRUE	255	L5	Sample 269	34.21		0
TRUE	255	L6	Sample 270	35.86		0
TRUE	255	L7	Sample 271	34.5		0
TRUE	255	L8	Sample 272	31.62		0
TRUE	255	L9	Sample 273	31.32		0
TRUE	255	L10	Sample 274	31.64		0
TRUE	255	L11	Sample 275	34.82		0
TRUE	255	L12	Sample 276	32.55		0
TRUE	255	L13	Sample 277	33.71		0
TRUE	255	L14	Sample 278	33.58		0
TRUE	255	L15	Sample 279	35.99		0
TRUE	255	L16	Sample 280	34.81		0
TRUE	65280	L17	Sample 281			0
TRUE	65280	L18	Sample 282			0
TRUE	65280	L19	Sample 283			0
TRUE	65280	L20	Sample 284			0
TRUE	65280	L21	Sample 285			0
TRUE	65280	L22	Sample 286			0
TRUE	65280	L23	Sample 287			0
TRUE	65280	L24	Sample 288			0
TRUE	65280	M1	Sample 289			0
TRUE	255	M2	Sample 290	34.55		0
TRUE	255	M3	Sample 291	34.17		0
TRUE	255	M4	Sample 292	34.88		0
TRUE	255	M5	Sample 293	34.97		0
TRUE	255	M6	Sample 294	35.64		0
TRUE	255	M7	Sample 295	45		0	> - Late Cp call (last five cycles) has higher uncertainty
TRUE	255	M8	Sample 296	31.94		0
TRUE	255	M9	Sample 297	31.07		0
TRUE	255	M10	Sample 298	31.34		0
TRUE	65280	M11	Sample 299			0
TRUE	65280	M12	Sample 300			0
TRUE	255	M13	Sample 301	36.13		0
TRUE	255	M14	Sample 302	38.66		0
TRUE	255	M15	Sample 303	36.84		0
TRUE	255	M16	Sample 304	36.58		0
TRUE	65280	M17	Sample 305			0
TRUE	65280	M18	Sample 306			0
TRUE	65280	M19	Sample 307			0
TRUE	65280	M20	Sample 308			0
TRUE	65280	M21	Sample 309			0
TRUE	65280	M22	Sample 310			0
TRUE	65280	M23	Sample 311			0
TRUE	65280	M24	Sample 312			0
TRUE	65280	N1	Sample 313			0
TRUE	65280	N2	Sample 314			0
TRUE	65280	N3	Sample 315			0
TRUE	65280	N4	Sample 316			0
TRUE	65280	N5	Sample 317			0
TRUE	65280	N6	Sample 318			0
TRUE	65280	N7	Sample 319			0
TRUE	65280	N8	Sample 320			0
TRUE	65280	N9	Sample 321			0
TRUE	65280	N10	Sample 322			0
TRUE	65280	N11	Sample 323			0
TRUE	65280	N12	Sample 324			0
TRUE	65280	N13	Sample 325			0
TRUE	65280	N14	Sample 326			0
TRUE	65280	N15	Sample 327			0
TRUE	65280	N16	Sample 328			0
TRUE	65280	N17	Sample 329			0
TRUE	65280	N18	Sample 330			0
TRUE	65280	N19	Sample 331			0
TRUE	65280	N20	Sample 332			0
TRUE	65280	N21	Sample 333			0
TRUE	65280	N22	Sample 334			0
TRUE	65280	N23	Sample 335			0
TRUE	65280	N24	Sample 336			0
TRUE	65280	O1	Sample 337			0
TRUE	65280	O2	Sample 338			0
TRUE	65280	O3	Sample 339			0
TRUE	65280	O4	Sample 340			0
TRUE	65280	O5	Sample 341			0
TRUE	65280	O6	Sample 342			0
TRUE	65280	O7	Sample 343			0
TRUE	65280	O8	Sample 344			0
TRUE	65280	O9	Sample 345			0
TRUE	65280	O10	Sample 346			0
TRUE	65280	O11	Sample 347			0
TRUE	65280	O12	Sample 348			0
TRUE	65280	O13	Sample 349			0
TRUE	65280	O14	Sample 350			0
TRUE	65280	O15	Sample 351			0
TRUE	65280	O16	Sample 352			0
TRUE	65280	O17	Sample 353			0
TRUE	65280	O18	Sample 354			0
TRUE	65280	O19	Sample 355			0
TRUE	65280	O20	Sample 356			0
TRUE	65280	O21	Sample 357			0
TRUE	65280	O22	Sample 358			0
TRUE	65280	O23	Sample 359			0
TRUE	65280	O24	Sample 360			0
TRUE	65280	P1	Sample 361			0
TRUE	65280	P2	Sample 362			0
TRUE	65280	P3	Sample 363			0
TRUE	65280	P4	Sample 364			0
TRUE	65280	P5	Sample 365			0
TRUE	65280	P6	Sample 366			0
TRUE	65280	P7	Sample 367			0
TRUE	65280	P8	Sample 368			0
TRUE	65280	P9	Sample 369			0
TRUE	65280	P10	Sample 370			0
TRUE	65280	P11	Sample 371			0
TRUE	65280	P12	Sample 372			0
TRUE	65280	P13	Sample 373			0
TRUE	65280	P14	Sample 374			0
TRUE	65280	P15	Sample 375			0
TRUE	65280	P16	Sample 376			0
TRUE	65280	P17	Sample 377			0
TRUE	65280	P18	Sample 378			0
TRUE	65280	P19	Sample 379			0
TRUE	65280	P20	Sample 380			0
TRUE	65280	P21	Sample 381			0
TRUE	65280	P22	Sample 382			0
TRUE	65280	P23	Sample 383			0
TRUE	65280	P24	Sample 384			0

## Sheet: Figure 1 C 
	Figure 1 source source data. Expression of Pcdh-γ during the period of programmed cell death
		CT values
	Genes	Gapdh			Pcdhgc3			Pcdhgc4			Pcdhgc5			Pcdhga1			Pcdhga2			Pcdhga3			Pcdhgb2			Pcdhgb6			Pcdhgb7			Gad2
	Gad67GFP - P2	23.63	23.6	23.6	28.17	28.22	28.91	28.54	28.6	28.66	32.57	32.6	32.66	32.43	32.72	32.65	32.05	32.6	31.69	30.99	31.52	30.9	31.16	30.64	31.01	30.63	30.53	30.54	31.73	31.85	31.79	27.16	27.13
	Gad67GFP - P5	22.27	22.3	22.24	27.1	27.02	27.12	27.09	27.07	27.07	30.99	30.93	30.93	31.22	30.73	30.98	30.7	30.78	30.85	29.5	29.32	29.71	30.28	30.42	30.7	29.15	29.11	29.18	30.51	30.55	30.27	25.98	25.94
	Gad67GFP - P8	21.49	21.5	21.46	27.61	27.68	27.61	26.43	26.46	26.24	29.63	29.71	29.74	30.65	30.31	30.53	30.29	29.93	30.05	29.19	29.46	29.54	30.11	30.22	30.32	29.21	29.63	29.56	30.52	30.63	30.3	24.29	24.41
	Gad67GFP - P12	27.05	26.96	26.85	31.5	32.6	32	30.68	30.35	30.45	32.83	33.24	33.47	33.68	33.9	34.8	33	33.72	33.88	33.62	32.27	33.97	31.73	31.34	31.73	33.74	32.92	33.83	34.47	36	34.22	28.12	28.43
	Gad67GFP - P15	26.77	26.57	26.62	33	31.55	31.77	30.56	30.74	30.67	32.68	32.32	32.08	34.42	34.61	35.48	34.7	33.32	34.06	34.21	35.86	34.5	31.62	31.32	31.64	34.82	32.55	33.71	33.58	35.99	34.81	27.44	27.57
	Gad67GFP - P30	28.2	29.75	29.65	34.86	36.59	36.59	34.83	36.65	35.97	34.87	35.86	34.44			36.56	34.55	34.17	34.88	34.97	35.64	45	31.94	31.07	31.34			36.13	38.66	36.84	36.58	30.85	30.64	<<many ct values below threshold ( not included in analysis)
																							small peaks
		Average CT values for each gene
		Gapdh	C3	C4	C5	A1	A2	A3	B2	B6	B7	Gad2
	Gad67GFP - P2	23.61	28.195	28.6	32.61	32.6	32.1133	31.1367	30.9367	30.5667	31.79	27.145
	Gad67GFP - P5	22.27	27.06	27.0767	30.95	30.9767	30.7767	29.51	30.4667	29.1467	30.4433	25.96
	Gad67GFP - P8	21.4833	27.645	26.3767	29.6933	30.4967	30.09	29.3967	30.2167	29.595	30.4833	24.35
	Gad67GFP - P12	26.9533	32.0333	30.4933	33.18	33.79	33.8	33.2867	31.6	33.4967	34.8967	28.275
	Gad67GFP - P15	26.6533	31.66	30.6567	32.36	34.515	34.0267	34.8567	31.5267	33.6933	34.7933	27.505																	Figure 1C
	CT values for each gene replica normalized to Gapdh (ΔCt )														CT values for each gene replica vs relative to their P2 value (ΔΔCt )														fold change for each gene replica relative to P2 (2 ^ΔΔCt )
	vs Gapdh		C3	C4	C5	A1	A2	A3	B2	B6	B7	Gad2				vs themselves @ P2		C3	C4	C5	A1	A2	A3	B2	B6	B7	Gad2			Fold Ch relative to P2		C3	C4	C5	A1	A2	A3	B2	B6	B7	Gad2
	Gad67GFP - P2		4.56	4.93	8.96	8.82	8.44	7.38	7.55	7.02	8.12	3.55				Gad67GFP - P2		0	0	0	0	0	0	0	0	0	0			Gad67GFP - P2		1	1	1	1	1	1	1	1	1	1
	Gad67GFP - P5		4.83	4.82	8.72	8.95	8.43	7.23	8.01	6.88	8.24	3.71				Gad67GFP - P5		0.27	-0.11	-0.24	0.13	-0.01	-0.15	0.46	-0.14	0.12	0.16			Gad67GFP - P5		0.82932	1.07923	1.18099	0.913831	1.00696	1.10957	0.726986	1.10191	0.920188	0.895025
	Gad67GFP - P8		6.12667	4.94667	8.14667	9.16667	8.80667	7.70667	8.62667	7.72667	9.03667	2.80667				Gad67GFP - P8		1.56667	0.0166667	-0.813333	0.346667	0.366667	0.326667	1.07667	0.706667	0.916667	-0.743333			Gad67GFP - P8		0.337587	0.988514	1.75727	0.786399	0.775572	0.797377	0.474123	0.612734	0.529732	1.67404
	Gad67GFP - P12		4.54667	3.72667	5.87667	6.72667	6.04667	6.66667	4.77667	6.78667	7.51667	1.16667				Gad67GFP - P12		-0.0133333	-1.20333	-3.08333	-2.09333	-2.39333	-0.713333	-2.77333	-0.233333	-0.603333	-2.38333			Gad67GFP - P12		1.00928	2.30271	8.4757	4.26733	5.2537	1.63959	6.83686	1.17555	1.51922	5.21741
	Gad67GFP - P15		6.34667	3.90667	6.02667	7.76667	8.04667	7.55667	4.96667	8.16667	6.92667	0.786667				Gad67GFP - P15		1.78667	-1.02333	-2.93333	-1.05333	-0.393333	0.176667	-2.58333	1.14667	-1.19333	-2.76333			Gad67GFP - P15		0.289841	2.03261	7.63873	2.07532	1.31342	0.884745	5.99323	0.451668	2.2868	6.78963
	vs Gapdh		C3	C4	C5	A1	A2	A3	B2	B6	B7	Gad2				vs themselves @ P2		C3	C4	C5	A1	A2	A3	B2	B6	B7	Gad2			Fold Ch vs Gad2 @ P2		C3	C4	C5	A1	A2	A3	B2	B6	B7	Gad2
	Gad67GFP - P2		4.61	5.05	8.99	9.11	8.99	7.91	7.03	6.92	8.24	3.52				Gad67GFP - P2		0	0	0	0	0	0	0	0	0	0			Gad67GFP - P2		1	1	1	1	1	1	1	1	1	1
	Gad67GFP - P5		4.75	4.8	8.66	8.46	8.51	7.05	8.15	6.84	8.28	3.67				Gad67GFP - P5		0.14	-0.25	-0.33	-0.65	-0.48	-0.86	1.12	-0.08	0.04	0.15			Gad67GFP - P5		0.907519	1.18921	1.25701	1.56917	1.39474	1.81504	0.460094	1.05702	0.972655	0.90125
	Gad67GFP - P8		6.19667	4.75667	8.22667	8.82667	8.44667	7.97667	8.73667	8.14667	9.14667	2.92667				Gad67GFP - P8		1.58667	-0.293333	-0.763333	-0.283333	-0.543333	0.0666667	1.70667	1.22667	0.906667	-0.593333			Gad67GFP - P8		0.33294	1.22547	1.69741	1.217	1.45734	0.954842	0.306367	0.427304	0.533416	1.50873
	Gad67GFP - P12		5.64667	3.49667	6.28667	6.94667	6.76667	5.31667	4.38667	5.96667	9.04667	1.47667				Gad67GFP - P12		1.03667	-1.55333	-2.70333	-2.16333	-2.22333	-2.59333	-2.64333	-0.953333	0.806667	-2.04333			Gad67GFP - P12		0.487452	2.93494	6.51305	4.47949	4.66971	6.03491	6.24774	1.93634	0.571701	4.12197
	Gad67GFP - P15		4.89667	4.01667	5.66667	7.95667	6.66667	9.20667	4.66667	5.89667	9.33667	0.916667				Gad67GFP - P15		0.286667	-1.03333	-3.32333	-1.15333	-2.32333	1.29667	-2.36333	-1.02333	1.09667	-2.60333			Gad67GFP - P15		0.819794	2.04675	10.0097	2.22427	5.00487	0.407066	5.14558	2.03261	0.467596	6.07689
	vs Gapdh		C3	C4	C5	A1	A2	A3	B2	B6	B7	Gad2				vs themselves @ P2		C3	C4	C5	A1	A2	A3	B2	B6	B7	Gad2			Fold Ch vs Gad2 @ P2		C3	C4	C5	A1	A2	A3	B2	B6	B7
	Gad67GFP - P2		5.3	5.05	9.05	9.04	8.08	7.29	7.4	6.93	8.18					Gad67GFP - P2		0	0	0	0	0	0	0	0	0	0			Gad67GFP - P2		1	1	1	1	1	1	1	1	1
	Gad67GFP - P5		4.85	4.8	8.66	8.71	8.58	7.44	8.43	6.91	8					Gad67GFP - P5		-0.45	-0.25	-0.39	-0.33	0.5	0.15	1.03	-0.02	-0.18	0			Gad67GFP - P5		1.36604	1.18921	1.31039	1.25701	0.707107	0.90125	0.48971	1.01396	1.13288
	Gad67GFP - P8		6.12667	4.75667	8.25667	9.04667	8.56667	8.05667	8.83667	8.07667	8.81667					Gad67GFP - P8		0.826667	-0.293333	-0.793333	0.00666667	0.486667	0.766667	1.43667	1.14667	0.636667	0			Gad67GFP - P8		0.56383	1.22547	1.73307	0.99539	0.713672	0.587774	0.36942	0.451668	0.643197
	Gad67GFP - P12		5.04667	3.49667	6.51667	7.84667	6.92667	7.01667	4.77667	6.87667	7.26667					Gad67GFP - P12		-0.253333	-1.55333	-2.53333	-1.19333	-1.15333	-0.273333	-2.62333	-0.0533333	-0.913333	0			Gad67GFP - P12		1.19196	2.93494	5.78908	2.2868	2.22427	1.2086	6.16172	1.03766	1.88339
	Gad67GFP - P15		5.11667	4.01667	5.42667	8.82667	7.40667	7.84667	4.98667	7.05667	8.15667					Gad67GFP - P15		-0.183333	-1.03333	-3.62333	-0.213333	-0.673333	0.556667	-2.41333	0.126667	-0.0233333	0			Gad67GFP - P15		1.1355	2.04675	12.3234	1.15936	1.59475	0.679871	5.32704	0.915945	1.0163
	Figure 1 source source data. CT values for qPCR reactions of Pcdhs

## Sheet: Figure 1C p values source
	Figure 1C - source data 1: detailed statistical analysis, exact sample numbers and p values in figure 1C.
	Kruskal-Wallis test	Pcdhgc3
	P value	0.2695
	Exact or approximate P value?	Exact
	P value summary	ns
	Do the medians vary signif. (P < 0.05)?	No
	Number of groups	5
	Kruskal-Wallis statistic	5.372
	Kruskal-Wallis test	Pcdhgc4		Pcdhgc4	Dunn's multiple comparisons test	Mean ± SD		Adjusted P Value
	P value	0.0007			P2 vs. P5	1 ± 0.000 (n=3)	1.153 ± 0.06351 (n=3)	0.9999
	Exact or approximate P value?	Exact			P2 vs. P8	1 ± 0.000 (n=3)	1.150 ± 0.1386 (n=3)	0.9999
	P value summary	***			P2 vs. P12	1 ± 0.000 (n=3)	2.720 ± 0.3637 (n=3)	0.0241
	Do the medians vary signif. (P < 0.05)?	Yes			P2 vs. P15	1 ± 0.000 (n=3)	2.043 ± 0.01155 (n=3)	0.2733
	Number of groups	5
	Kruskal-Wallis statistic	11.87
	Kruskal-Wallis test	Pcdhgc5		Pcdhgc5	Dunn's multiple comparisons test	Mean ± SD		Adjusted P Value
	P value	<0.0001			P2 vs. P5	1 ± 0.000 (n=3)	1.250 ± 0.06557 (n=3)	0.9999
	Exact or approximate P value?	Exact			P2 vs. P8	1 ± 0.000 (n=3)	1.730 ± 0.03000 (n=3)	0.9913
	P value summary	****			P2 vs. P12	1 ± 0.000 (n=3)	6.927 ± 1.393 (n=3)	0.1031
	Do the medians vary signif. (P < 0.05)?	Yes			P2 vs. P15	1 ± 0.000 (n=3)	9.990 ± 2.340 (n=3)	0.0134
	Number of groups	5
	Kruskal-Wallis statistic	13.33
	Kruskal-Wallis test	Pcdhga1		Pcdhga1	Dunn's multiple comparisons test	Mean ± SD		Adjusted P Value
	P value	0.0116			P2 vs. P5	1 ± 0.000 (n=3)	1.2407 ± 0.3302 (n=3)	0.9999
	Exact or approximate P value?	Exact			P2 vs. P8	1 ± 0.000 (n=3)	1.003 ± 0.2150 (n=3)	0.9999
	P value summary	*			P2 vs. P12	1 ± 0.000 (n=3)	3.680 ± 1.208 (n=3)	0.0866
	Do the medians vary signif. (P < 0.05)?	Yes			P2 vs. P15	1 ± 0.000 (n=3)	1.820± 0.5758 (n=3)	0.9999
	Number of groups	5
	Kruskal-Wallis statistic	10
	Kruskal-Wallis test	Pcdhga2		Pcdhga2	Dunn's multiple comparisons test	Mean ± SD		Adjusted P Value
	P value	0.0235			P2 vs. P5	1 ± 0.000 (n=3)	1.037 ± 0.3408 (n=3)	0.9999
	Exact or approximate P value?	Exact			P2 vs. P8	1 ± 0.000 (n=3)	0.9833 ± 0.4143 (n=3)	0.9999
	P value summary	*			P2 vs. P12	1 ± 0.000 (n=3)	4.047 ± 1.608 (n=3)	0.2188
	Do the medians vary signif. (P < 0.05)?	Yes			P2 vs. P15	1 ± 0.000 (n=3)	2.633 ± 2.054 (n=3)	0.9883
	Number of groups	5
	Kruskal-Wallis statistic	9.258
	Kruskal-Wallis test	Pcdhga3		Pcdhga3	Dunn's multiple comparisons test	Mean ± SD		Adjusted P Value
	P value	0.0027			P2 vs. P5	1 ± 0.000 (n=3)	1.277 ± 0.4821 (n=3)	0.9999
	Exact or approximate P value?	Exact			P2 vs. P8	1 ± 0.000 (n=3)	0.7800 ± 0.1808 (n=3)	0.9999
	P value summary	**			P2 vs. P12	1 ± 0.000 (n=3)	2.960 ± 2.667 (n=3)	0.9999
	Do the medians vary signif. (P < 0.05)?	Yes			P2 vs. P15	1 ± 0.000 (n=3)	0.6567 ± 0.2359 (n=3)	0.9913
	Number of groups	5
	Kruskal-Wallis statistic	11.08
	Kruskal-Wallis test	Pcdhgb6		Pcdhgb6	Dunn's multiple comparisons test	Mean ± SD		Adjusted P Value
	P value	0.0376			P2 vs. P5	1 ± 0.000 (n=3)	1.057 ± 0.04509 (n=3)	0.9999
	Exact or approximate P value?	Exact			P2 vs. P8	1 ± 0.000 (n=3)	0.4967 ± 0.09866 (n=3)	0.9999
	P value summary	*			P2 vs. P12	1 ± 0.000 (n=3)	1.387 ± 0.4843 (n=3)	0.9999
	Do the medians vary signif. (P < 0.05)?	Yes			P2 vs. P15	1 ± 0.000 (n=3)	1.133 ± 0.8113 (n=3)	0.9999
	Number of groups	5
	Kruskal-Wallis statistic	8.686
	Kruskal-Wallis test	Pcdhgb7
	P value	0.3837
	Exact or approximate P value?	Exact
	P value summary	ns
	Do the medians vary signif. (P < 0.05)?	No
	Number of groups	5
	Kruskal-Wallis statistic	4.44
