# Supplementary material for: Clustered gamma-protocadherins regulate cortical interneuron programmed cell death
Source: eLife. 2020 Jul 7;9:e55374. doi: 10.7554/eLife.55374 (PMC7373431; doi:10.7554/eLife.55374)
Supplement: Figure 2—figure supplement 2—source data 1. [file elife-55374-fig2-figsupp2-data1.xlsx]

## Sheet: Figure 2-supplement 1 raw data
	Figure 2 - Figure supplement 2. Detailed analysis of Gad2-derived tdTomato positive cells in visual cortex.
			M4-a			M4-b			M4-c			M4-d			M4-e
		section	tomato +	area (mm2)	cells/mm2	tomato +	area (mm2)	cells/mm2	tomato +	area (mm2)	cells/mm2	tomato +	area (mm2)	cells/mm2	tomato +	area (mm2)	cells/mm2
	layer	I	73	0.161198	452.86	62	0.171579	361.349	64	0.133176	480.566	63	0.145267	433.684	59	0.156986	375.829
		II/III	177	0.277378	638.119	195	0.32643	597.371	243	0.347869	698.539	241	0.35921	670.916	215	0.334108	643.505
		IV	110	0.186612	589.459	79	0.169446	466.225	173	0.327202	528.725	81	0.179085	452.299	94	0.184781	508.71
		V	151	0.252612	597.754	193	0.332186	581.001	195	0.330298	590.377	206	0.31159	661.125	175	0.297032	589.163
		VI	193	0.297788	648.113	156	0.301128	518.052	222	0.39115	567.558	193	0.352513	547.497	155	0.321057	482.78
		total	704	1.17559	598.85	685	1.30077	526.612	897	1.52969	586.392	784	1.34767	581.747	698	1.29396	539.428
			M8-a			M8-b			M8-c			M8-d			M8-e
		section	tomato +	area (mm2)	cells/mm2	tomato +	area (mm2)	cells/mm2	tomato +	area (mm2)	cells/mm2	tomato +	area (mm2)	cells/mm2	tomato +	area (mm2)	cells/mm2
	layer	I	60	0.149089	402.445	71	0.147865	480.167	56	0.13398	417.972	49	0.138309	354.28	56	0.149675	374.144
		II/III	190	0.367365	517.197	197	0.382374	515.202	186	0.375842	494.889	207	0.394174	525.149	215	0.390772	550.193
		IV	81	0.185372	436.959	62	0.175456	353.365	113	0.253343	446.036	67	0.174993	382.873	78	0.195318	399.348
		V	141	0.280377	502.895	124	0.277261	447.232	203	0.347628	583.957	158	0.285223	553.953	132	0.281896	468.258
		VI	126	0.311519	404.47	142	0.328687	432.022	114	0.378887	300.881	185	0.382876	483.185	163	0.342434	476.004
		total	598	1.29372	462.232	596	1.31164	454.392	672	1.48968	451.103	666	1.37557	484.161	644	1.3601	473.496
			WT1-a			WT1-b			WT1-c			WT1-d			WT1-e
		section	tomato +	area (mm2)	cells/mm2	tomato +	area (mm2)	cells/mm2	tomato +	area (mm2)	cells/mm2	tomato +	area (mm2)	cells/mm2	tomato +	area (mm2)	cells/mm2
	layer	I	98	0.146678	668.129	95	0.139988	678.63	88	0.155513	565.869	128	0.134189	953.879	80	0.135316	591.208
		II/III	415	0.361188	1148.99	353	0.340931	1035.4	326	0.322003	1012.41	413	0.286652	1440.77	385	0.363225	1059.95
		IV	181	0.142272	1272.21	222	0.209604	1059.14	190	0.188374	1008.63	198	0.155376	1274.33	176	0.173123	1016.62
		V	366	0.260427	1405.38	352	0.283681	1240.83	380	0.295192	1287.3	453	0.299479	1512.63	307	0.263649	1164.43
		VI	205	0.28026	731.464	277	0.35743	774.977	267	0.356463	749.025	225	0.318289	706.904	199	0.29502	674.531
		total	1265	1.19083	1062.29	1299	1.33163	975.493	1251	1.31755	949.493	1417	1.19399	1186.78	1147	1.23033	932.268
			WT2-a			WT2-b			WT2-c			WT2-d			WT2-e
		section	tomato +	area (mm2)	cells/mm2	tomato +	area (mm2)	cells/mm2	tomato +	area (mm2)	cells/mm2	tomato +	area (mm2)	cells/mm2	tomato +	area (mm2)	cells/mm2
	layer	I	46	0.0780842	589.107	78	0.171868	453.837	94	0.120703	778.772	80	0.138771	576.488	70	0.142751	490.364
		II/III	281	0.261381	1075.06	353	0.379778	929.489	316	0.257907	1225.25	280	0.337536	829.542	268	0.331365	808.775
		IV	126	0.125233	1006.13	189	0.168882	1119.12	213	0.194968	1092.49	194	0.199454	972.656	186	0.194718	955.228
		V	274	0.196778	1392.43	364	0.311267	1169.41	443	0.357286	1239.9	425	0.332994	1276.3	406	0.315205	1288.05
		VI	145	0.186023	779.474	183	0.287418	636.704	206	0.34094	604.211	248	0.363591	682.085	219	0.31688	691.113
		total	872	0.847498	1028.91	1167	1.31921	884.618	1272	1.2718	1000.15	1227	1.37235	894.089	1149	1.30092	883.221
			WT3-a			WT3-b			WT3-c			WT3-d			WT3-e
		section	tomato +	area (mm2)	cells/mm2	tomato +	area (mm2)	cells/mm2	tomato +	area (mm2)	cells/mm2	tomato +	area (mm2)	cells/mm2	tomato +	area (mm2)	cells/mm2
	layer	I	89	0.159188	559.086	87	0.128818	675.37	99	0.127654	775.531	64	0.127977	500.088	61	0.141374	431.479
		II/III	316	0.333118	948.613	421	0.350579	1200.87	397	0.330586	1200.9	354	0.383039	924.188	321	0.377061	851.321
		IV	156	0.199005	783.901	222	0.152736	1453.49	177	0.163734	1081.02	146	0.16608	879.093	156	0.169176	922.119
		V	385	0.327814	1174.45	385	0.302022	1274.74	417	0.298963	1394.82	430	0.331551	1296.94	365	0.328039	1112.67
		VI	164	0.280189	585.319	196	0.283658	690.973	222	0.311675	712.281	235	0.362338	648.566	234	0.337038	694.283
		total	1110	1.29931	854.297	1311	1.21781	1076.52	1312	1.23261	1064.41	1229	1.37099	896.436	1137	1.35269	840.549
			Homo1- 1			Homo1 -2			Homo1- 3			Homo1- 4			Homo1- 5
		section	tomato +	area (mm2)	cells/mm2	tomato +	area (mm2)	cells/mm2	tomato +	area (mm2)	cells/mm2	tomato +	area (mm2)	cells/mm2	tomato +	area (mm2)	cells/mm2
	layer	I	91	0.167833	542.206	79	0.165064	478.601	52	0.165064	315.029	61	0.161403	377.937	77	0.150505	511.611
		II/III	272	0.308797	880.837	261	0.313962	831.31	223	0.313962	710.276	199	0.321065	619.812	273	0.309998	880.652
		IV	91	0.151182	601.922	73	0.133914	545.125	95	0.133914	709.41	62	0.159874	387.806	95	0.15705	604.903
		V	223	0.305092	730.927	201	0.31045	647.447	172	0.31045	554.035	204	0.327771	622.386	219	0.297796	735.402
		VI	129	0.266614	483.846	127	0.249341	509.342	94	0.249341	376.994	125	0.299552	417.289	135	0.234045	576.812
		total	806	1.19952	671.937	741	1.17273	631.858	636	1.17273	542.323	651	1.26966	512.734	799	1.14939	695.149

## Sheet: Figure 2-supplement 1
			Figure 2 - Figure supplement 2. Reduced number of cINs in all cortical layers of visual cortex of Pcdhg loss of fuction in GAD2-expressing cINs.
				Gad2Cre;Ai14;Pcdhg			Gad2Cre;Ai14;Pcdhg
				WT			mutant
			layer	Mean # tdTomato+ cells /mm2	Mean % tdTomato+ cells	layer	Mean # tdTomato+ cells /mm2	Mean % tdTomato+ cells
	layer		I	691.543	0.0766578	I	420.858	0.0851911
	I		II/III	1139.5	0.296598	II/III	649.69	0.284236
	II/III		IV	1126.19	0.151591	IV	509.084	0.142516
	IV		V	1322.11	0.291268	V	603.884	0.244161
	V		VI	727.38	0.183885	VI	552.8	0.243896
	VI		total	1021.26	1	total	566.605	1
	section		I	577.714	0.064709	I	405.802	0.0919395
	I		II/III	973.623	0.263408	II/III	520.526	0.313287
	II/III		IV	1029.12	0.159662	IV	403.716	0.126259
	IV		V	1273.22	0.336205	V	511.259	0.238665
	V		VI	678.717	0.176015	VI	419.312	0.229849
	VI		total	938.199	1	total	465.077	1
	section
	I		I	588.311	0.0655845	I	445.077	0.0990917
	II/III		II/III	1025.18	0.296606	II/III	784.577	0.338013
	IV		IV	1023.92	0.140515	IV	569.833	0.114506
	V		V	1250.72	0.324971	V	658.04	0.280484
	VI		VI	666.284	0.172323	VI	472.857	0.167905
	total		total	946.441	1	total	610.8	1
			Figure 2 - Figure supplement 2 source data. Detailed analysis of Gad2-derived tdTomato positive cells in visual cortex of P30 mice. Note that layer distribution is similar between control and mutant mice, but the number of cIN is reduced in each cortical layer in mutant mice.
