# Supplementary material for: Clustered gamma-protocadherins regulate cortical interneuron programmed cell death
Source: eLife. 2020 Jul 7;9:e55374. doi: 10.7554/eLife.55374 (PMC7373431; doi:10.7554/eLife.55374)
Supplement: Figure 2—source data 1. [file elife-55374-fig2-data1.xlsx]

## Sheet: Figure 2B 
Figure 2B'. Loss of Pcdhg function in all interneurons results in decreased body weight but normal cortex thickness.
	Body weight measurements (grams) P30				V1 cortex thickness (μm) at P30
	Gad2Cre;Ai14;Pcdhg				Gad2Cre;Ai14;Pcdhg
	WT	HET	mutant		WT	HET	mutant		20	19	8
	20	19	8		844.8	956.833	883.833		18	19	13
	18	19	13		865	916.667	899.5		16	17	12
	16	15	12		824.167	921.5	841.833		16	15.2	8.4
	16	18.1	8.4			929.167			18	19.8	12.5
	18	19.1	12.5			904.333			17.5	15
	17.5	19.8							20.9
	20.9	15							17.8
	17.8								17.8
	17.8								22.7
	22.7								17.5
	17.5								20.9
	20.9
	Figure 2B'. Body weight measurements in Gad2Cre;Ai14 mice carrying the WT, HET or mutant Pcdhg (Left table). Measurements of cortex thickness in the visual region ( right table) .

## Sheet: Figure 2C′ raw data
	P30 Gad2Cre;Ai14	litter 1					P30 Gad2Cre;Ai14	litter 2
	V1	Mouse ID	Estimated tdTomato positive population	Measured Volume (μm3)	Cell Density (mm3)
	Pcdhg WT	1	41625.7	1323150000	31459.5		V1	Mouse ID	Estimated tdTomato positive population	Measured Volume (μm3)	Cell Density (mm3)
		2	53302.4	1949980000	27334.8		Pcdhgfcon3/+	1	38611.4	1457390000	26493.5
		3	66848.1	2106500000	31734.2			2	38412.8	1619790000	23714.7
	Pcdhgfcon3/+	6	54841.5	1960090000	27979.1		Pcdhgfcon3/fcon3	1	19722.3	1029990000	19148
		11	61143.2	1937510000	31557.6			2	20791.6	1055700000	19694.6
		12	48394.7	1695970000	28535.1
	Pcdhgfcon3/fcon3	4	24398.7	2229050000	10945.8
		8	22563	1805900000	12494
	S1BF	Mouse ID	Estimated tdTomato positive population	Measured Volume (μm3)	Cell Density (mm3)		S1BF	Mouse ID	Estimated tdTomato positive population	Measured Volume (μm3)	Cell Density (mm3)
	Pcdhg WT	1	212275	6407300000	33130.1		Pcdhgfcon3/+	1	132267	5274900000	25074.8
		2	261910	9592290000	27304.2			2	200762	6373820000	31498
		3	248526	9233760000	26915		Pcdhgfcon3/fcon3	1	59274.1	4798670000	12352.2
	Pcdhgfcon3/+	6	270749	9620530000	28142.8			2	80439.2	6201320000	12971.3
		11	269160	9513250000	28293.1
		12	216414	8701590000	24870.6
	Pcdhgfcon3/fcon3	4	120611	8639510000	13960.4
		8	144507	8965670000	16117.8
	Figure 2C. Density of cIN in visual (V1) and barrel (S1BF) cortex of P30 Gad2Cre; Ai14 mice carrying WT, heterozygote or mutant Pcdhg.

## Sheet: Figure 2C′
	Figure 2C. Embryonic loss of Pcdhg in all cINs results in dramatic reduction of cINs in visual (V1) and barrel (S1BF) cortex.
	Figure 2C prime
	V1 P30				S1 P30
	summary				summary
	P30 Gad2Cre;Ai14;Pcdhg				P30 Gad2Cre;Ai14;Pcdhg
	WT	HET	mutant		WT	HET	mutant
	31459.5	27979.1	10945.8		33130.1	28142.8	13960.4
	27334.8	31557.6	12494		27304.2	28293.1	16117.8
	31734.2	28535.1	19148		26915	24870.6	12352.2
		26493.5	19694.6			25074.8	12971.3
		23714.7				31498
	Figure 2C. Density of cIN in visual (V1) and barrel (S1BF) cortex of P30 Gad2Cre; Ai14 mice carrying WT, heterozygote or mutant Pcdhg.

## Sheet: Figure 2D′ raw data
	Data: V1 cell quantifications of PV+, SST+, RLN+ and VIP+ cINs
	PV															SST															RLN															VIP
	WT #1	Area (mm2)	Nb Cells PV+	PV+ / mm2		Het #6	Area (mm2)	Nb Cells PV+	PV+ / mm2		Homo #4	Area (mm2)	Nb Cells PV+	PV+ / mm2		WT #1	Area (mm2)	Nb Cells SST+	SST+/ mm2		Het #6	Area (mm2)	Nb Cells SST+	SST+/ mm2		Homo #4	Area (mm2)	Nb Cells SST+	SST+/ mm2		WT #1	Area (mm2)	Nb Cells RLN+	RLN+ / mm2		Het #6	Area (mm2)	Nb Cells RLN+	RLN+ / mm2		Homo #4	Area (mm2)	Nb Cells RLN+	RLN+ / mm2		WT #1	Area (mm2)	Nb Cells VIP+	VIP+ / mm2
																a	1.1684	262	4484.75		a	1.33494	200	2996.39							a	1.4	286	4085.71		a	1.33264	278	4172.18		a	1.10271	121	2194.59		a	1.10075	156	2834.43
						a	1.21064	436	7202.82		a	1.0464	265	5064.98		b	1.25287	238	3799.29		b	1.32794	211	3177.84		a	1.11913	108	1930.07		b	1.56	302	3871.79		b	1.26929	247	3891.94		b	1.26225	117	1853.83		b	1.19656	146	2440.33
	b	1.02529	480	9363.24		b	1.2951	400	6177.14		b	1.04263	235	4507.82		c	1.17544	229	3896.41		c	1.33733	242	3619.15		b	1.22002	105	1721.28		c	1.41635	309	4363.33		c	1.34202	266	3964.17		c	1.20829	119	1969.73		c	1.26694	150	2367.9
	c	1.18952	504	8474.01		c	1.14729	465	8106.07		c	1.22471	280	4572.5		d	1.09567	240	4380.88		d	1.39833	215	3075.1		c	1.2294	125	2033.51		d	1.48064	275	3714.6		d	1.32794	241	3629.67		d	1.1684	122	2088.32		d	1.28102	142	2216.98
	d	1.1731	511	8711.99		d	1.25551	413	6578.98		d	1.15198	263	4566.05		e	1.14025	257	4507.79		e	1.39598	221	3166.23		d	1.19656	107	1788.46		e	1.47378	303	4111.86		e	1.24583	231	3708.38		e	1.23644	128	2070.46		e	1.22002	166	2721.27
	e	1.06517	492	9237.95		e	0.962965	371	7705.37		e	1.07456	252	4690.31		Mean	1.16653	245.2	4213.82		f	1.41475	232	3279.72		e	1.17075	101	1725.39		f	1.48433	305	4109.6		f	1.25521	257	4094.92		f	1.07456	119	2214.87		f	1.19656	141	2356.76
	f	1.19421	467	7821.06		f	1.18053	406	6878.25		f	1.03232	281	5444.03							Mean	1.36821	220.167	3219.07		f	1.10036	109	1981.16		Mean	1.46918	296.667	4042.82		Mean	1.29549	253.333	3910.21		Mean	1.17544	121	2065.3		Mean	1.21031	150.167	2489.61
	Mean	1.12946	490.8	8721.65		Mean	1.17534	415.167	7108.11		Mean	1.09543	262.667	4807.62		WT #2	Area (mm2)	Nb Cells SST+	SST+/ mm2							Mean	1.1727	109.167	1863.31
																					Het #11	Area (mm2)	Nb Cells SST+	SST+/ mm2							WT #2	Area (mm2)	Nb Cells RLN+	RLN+ / mm2		Het #11	Area (mm2)	Nb Cells RLN+	RLN+ / mm2		Homo #8	Area (mm2)	Nb Cells RLN+	RLN+ / mm2		WT #2	Area (mm2)	Nb Cells VIP+	VIP+ / mm2
	WT #2	Area (mm2)	Nb Cells PV+	PV+ / mm2		Het #11	Area (mm2)	Nb Cells PV+	PV+ / mm2		Homo #4	Area (mm2)	Nb Cells PV+	PV+ / mm2		a	1.01825	215	4222.94							Homo #8	Area (mm2)	Nb Cells SST+	SST+/ mm2		a	1.55	362	4681.4		a	1.2294	249	4050.74		a	1.12148	116	2068.69		a	1.10075	156	2834.43
																b	1.29829	214	3296.65		a	1.25991	218	3460.58							b	1.53733	387	5034.69		b	1.2646	268	4238.5		b	1.18248	130	2198.77		b	1.19656	146	2440.33
	a	1.1074	445	8036.86		a	1.10506	448	8108.19		a	1.14963	238	4140.45		c	1.25287	256	4086.63		b	1.3561	228	3362.59		a	1.1684	97	1660.39		c	1.58958	351	4416.27		c	1.16371	220	3781.01		c	1.20594	111	1840.88		c	1.26694	150	2367.9
	b	1.14963	431	7498.04		b	1.02529	427	8329.38		b	1.00882	216	4282.25		d	1.28337	233	3631.07		c	1.33264	232	3481.82		b	1.23175	86	1396.39		d	1.58893	302	3801.31		d	1.19186	222	3725.25		d	1.28806	111	1723.52		d	1.28102	142	2216.98
	c	1.26225	522	8270.94		c	1.20829	430	7117.5		c	0.994774	250	5026.27		e	1.24348	225	3618.87		d	1.30917	230	3513.66		c	1.31856	112	1698.82		e	1.63136	354	4339.93		e	1.2646	265	4191.06		e	1.25521	102	1625.22		e	1.22002	166	2721.27
	d	1.13086	420	7427.95		d	1.2202	445	7293.89		d	1.1423	291	5095.01		f	1.1989	237	3953.61		e	1.28102	250	3903.14		d	1.17779	102	1732.06		f	1.61253	301	3733.27		f	1.24114	265	4270.28		f	1.1121	109	1960.26		f	1.19656	141	2356.76
	e	1.07925	472	8746.83		e	1.19421	492	8239.74		e	1.0481	225	4293.5		Mean	1.21586	230	3801.63		Mean	1.30777	231.6	3544.36		e	1.2294	103	1675.61		Mean	1.58495	342.833	4334.48		Mean	1.22588	248.167	4042.81		Mean	1.19421	113.167	1902.89		Mean	1.21031	150.167	2489.61
	Mean	1.14588	458	7996.12		f	1.0958	465	8486.92		f	1.01355	242	4775.27												f	1.10036	109	1981.16
						Mean	1.14147	451.167	7929.27		Mean	1.05953	243.667	4602.12		WT #3	Area (mm2)	Nb Cells SST+	SST+/ mm2		Het #12	Area (mm2)	Nb Cells SST+	SST+/ mm2		Mean	1.20438	101.5	1690.74		WT #3	Area (mm2)	Nb Cells RLN+	RLN+ / mm2		Het #12	Area (mm2)	Nb Cells RLN+	RLN+ / mm2		Homo #1	Area (mm2)	Nb Cells RLN+	RLN+ / mm2		WT #3	Area (mm2)	Nb Cells VIP+	VIP+ / mm2
																															a	1.15902	279	4814.42		a	1.23175	226	3669.57		a	1.14058	123	2156.79		a	1.14025	157	2753.78
	WT #3	Area (mm2)	Nb Cells PV+	PV+ / mm2		Het #11	Area (mm2)	Nb Cells PV+	PV+ / mm2		Homo #1	Area (mm2)	Nb Cells PV+	PV+ / mm2		a	1.25287	219	3495.98		a	1.30917	220	3360.9		Homo #1	Area (mm2)	Nb Cells SST+	SST+/ mm2		b	1.14025	274	4805.97		b	1.23175	310	5033.48		b	1.05859	98	1851.52		b	1.03232	147	2847.94
																b	1.15198	265	4600.77		b	1.35375	229	3383.19							c	1.13321	251	4429.89		c	1.46402	285	3893.38		c	1.11342	101	1814.24		c	1.20594	152	2520.85
	a	1.10036	408	7415.73		a	1.20125	444	7392.3		a	0.996133	196	3935.22		c	1.19656	243	4061.65		c	1.31152	240	3659.87		a	1.29687	163	2513.74		d	1.18013	252	4270.7		d	1.34437	297	4418.43		d	1.1724	112	1910.61		d	1.26694	163	2573.12
	b	1.02998	413	8019.59		b	0.943668	348	7375.48		b	1.01015	225	4454.8		d	1.37018	234	3415.62		d	1.37487	212	3083.93		b	1.12992	108	1911.63		e	1.19186	229	3842.72		e	1.23644	289	4674.7		e	1.31213	124	1890.05		e	1.18717	146	2459.62
	c	1.03702	407	7849.44		c	1.26929	382	6019.11		c	1.17439	293	4989.81		e	1.2646	235	3716.6		Mean	1.33733	225.25	3371.97		c	1.17738	99	1681.7		f	1.1684	246	4210.88		f	1.22471	246	4017.27		f	1.21878	109	1788.68		f	1.20125	164	2730.49
	d	1.14025	494	8664.77		d	1.22002	418	6852.35		d	1.23689	264	4268.76		f	1.2341	214	3468.12							d	1.30601	111	1699.83		Mean	1.16215	255.167	4395.76		Mean	1.28884	275.5	4284.47		g	1.14537	102	1781.08		Mean	1.17231	154.833	2647.64
	e	1.0464	479	9155.19		e	0.812167	328	8077.16		e	1.11901	237	4235.89		Mean	1.24505	235	3793.13		Het #1	Area (mm2)	Nb Cells SST+	SST+/ mm2		e	1.12756	112	1986.59												h	1.20438	111	1843.28
	f	0.90563	427	9429.9		f	1.07925	446	8265.01		f	1.0051	194	3860.3												f	1.29736	131	2019.49							Het #2	Area (mm2)	Nb Cells RLN+	RLN+ / mm2		Mean	1.17071	110	1879.53
	Mean	1.03186	444	8422.44		Mean	1.08761	394.333	7330.23		Mean	1.09028	234.833	4290.8							a	1.33916	204	3046.68		Mean	1.22252	120.667	1968.83							a	1.33961	239	3568.2
																					b	1.35334	192	2837.42												b	1.24941	245	3921.86		Homo #2	Area (mm2)	Nb Cells RLN+	RLN+ / mm2
						Het #2	Area (mm2)	Nb Cells PV+	PV+ / mm2		Homo #2	Area (mm2)	Nb Cells PV+	PV+ / mm2							c	1.41762	216	3047.36		Homo #2	Area (mm2)	Nb Cells SST+	SST+/ mm2							c	1.24529	227	3645.75		a	1.2578	113	1796.78
																					d	1.47151	240	3261.94												d	1.24285	257	4135.65		b	1.28053	133	2077.26
						a	1.16593	316	5420.56		a	1.14267	222	3885.63							e	1.41769	211	2976.67		a	1.396	119	1704.87							e	1.27956	272	4251.45		c	1.2279	122	1987.13
						b	1.06745	293	5489.72		b	1.11828	211	3773.67							f	1.3558	225	3319.07		b	1.27716	110	1722.57							f	1.28232	221	3446.89		d	1.26095	123	1950.91
						c	1.20392	402	6678.16		c	1.21948	247	4050.9							Mean	1.39252	214.667	3081.52		c	1.29083	115	1781.8							g	1.25404	236	3763.84		e	1.23765	104	1680.6
						d	1.11407	342	6139.67		d	1.16372	220	3780.97												d	1.23001	116	1886.17							h	1.2684	232	3658.15		f	1.25218	106	1693.05
						e	1.00257	313	6243.93		e	1.11458	233	4180.95							Het #2	Area (mm2)	Nb Cells SST+	SST+/ mm2		e	1.11233	106	1905.9							Mean	1.27018	241.125	3798.97		g	1.19663	123	2055.77
						f	1.14254	332	5811.59		Mean	1.15175	226.6	3934.43												f	1.32505	135	2037.66												h	1.29713	125	1927.33
						Mean	1.11608	333	5963.94												a	1.36172	217	3187.14		Mean	1.2719	116.833	1839.83												Mean	1.25135	118.625	1896.11
																					b	1.40285	240	3421.61
																					c	1.31862	189	2866.63
																					d	1.3915	209	3003.96
				# of PV+ / mm2					# of PV+ / mm2					# of PV+ / mm2							e	1.42396	204	2865.24
	MEAN of all means	1.1024	464.267	8380.07		MEAN of all means	1.13013	398.417	7082.89		MEAN of all means	1.09925	241.942	4408.74							f	1.31997	206	3121.29
																					Mean	1.36977	210.833	3077.65
																			# of SST+/ mm2					# of SST+/ mm2					# of SST+/ mm2
																																		# of RLN+ / mm2					# of RLN+ / mm2					# of RLN+ / mm2					# of VIP+ / mm2
																MEAN of all means	1.20914	236.733	3936.19		MEAN of all means	1.35512	220.503	3258.91		MEAN of all means	1.21787	112.042	1840.68		MEAN of all means	1.40543	298.222	4257.69		MEAN of all means	1.2701	254.531	4009.12		MEAN of all means	1.19793	115.698	1935.96		MEAN of all means	1.19764	151.722	2542.29

## Sheet: Figure 2D′
	Figure 2D. Pcdhg loss of function in GAD2-expressing cINs results in reduction of the four non-overlapping cIN subtypes in visual cortex.
		PV+ cells/mm2				SST+ cells/mm2				RLN+ cells/mm2				VIP+ cells/mm2
		P30 Gad2Cre;Ai14;Pcdhg				P30 Gad2Cre;Ai14;Pcdhg				P30 Gad2Cre;Ai14;Pcdhg				P30 Gad2Cre;Ai14;Pcdhg
		WT	HET	mutant		WT	HET	mutant		WT	HET	mutant		WT	HET	mutant
		8721.65	7108.11	4807.62		4213.82	3219.07	1863.31		4042.82	3910.21	2065.3		2489.61	2339.52	1565.03
		7996.12	7929.27	4602.12		3801.63	3544.36	1690.74		4334.48	4042.81	1902.89		2489.61	2683.86	1618.83
		8422.44	7330.23	4290.8		3793.13	3371.97	1968.83		4395.76	4284.47	1879.53		2647.64	2664.89	1428.68
			5963.94	3934.43			3081.52	1839.83			3798.97	1896.11			2006.24	1267.88
							3077.65
	Figure 2D. Density of cIN subtypes (PV, SST, RLN and VIP) in visual cortex of P30 Gad2Cre; Ai14 mice carrying WT, heterozygote or mutant Pcdhg.
