# Supplementary material for: Clustered gamma-protocadherins regulate cortical interneuron programmed cell death
Source: eLife. 2020 Jul 7;9:e55374. doi: 10.7554/eLife.55374 (PMC7373431; doi:10.7554/eLife.55374)
Supplement: Figure 3—figure supplement 2—source data 1. [file elife-55374-fig3-figsupp2-data1.xlsx]

## Sheet: Figure 3 - Fig Supp 2 raw data
Figure 3- Figure supplement 2. Detailed quantification (by layer) of the density of Reelin (RLN) positive cINs in visual cortex of P30 Nkx2.1Cre;Ai14 mice carrying WT, heterozygote or mutant Pcdhg.
Nb Cells RLN+/mm2
Pcdhg WT						Pcdhg mut
section by layers	M3	Area (mm2)	Nb Cells RLN+	RLN / mm2		M9	Area (mm2)	Nb Cells RLN+	RLN / mm2
Layer 2-6	a	1.29435	229	3538.45		a	1.31904	68	1031.05
	b	1.28236	163	2542.18		b	1.20748	68	1126.31
	c	1.38302	208	3007.91		c	1.25679	80	1273.08
	d	1.3945	183	2624.59		d	1.39546	91	1304.23
	e	1.28869	159	2467.62		e	1.26694	82	1294.46
	f	1.57801	220	2788.32		f	1.22863	60	976.701
	g	1.29616	159	2453.41
Mean # of RLN+ cells/mm2				2774.64					1167.64
Layer 1	a	0.189697	79	8329.07		a	0.192358	87	9045.63
	b	0.178005	76	8539.09		b	0.209207	94	8986.31
	c	0.176504	82	9291.57		c	0.179302	77	8588.86
	d	0.181628	83	9139.56		d	0.178223	78	8753.08
	e	0.196821	84	8535.67		e	0.17678	86	9729.61
	f	0.187123	73	7802.35		f	0.197054	92	9337.54
Mean # of RLN+ cells/mm2				8606.22					9073.51
	M8	Area (mm2)	Nb Cells RLN+	RLN/ mm2		M13	Area (mm2)	Nb Cells RLN+	RLN / mm2
Layer 2-6	a	1.29891	163	2509.79		a	1.31776	62	940.988
	b	1.22814	160	2605.57		b	1.17158	77	1314.47
	c	1.25155	144	2301.14		c	1.19633	77	1287.27
	d	1.3607	142	2087.15		d	1.33437	81	1214.06
	e	1.34154	164	2444.94		e	1.25699	91	1447.9
						f	1.29174	70	1083.81
Mean # of RLN+ cells/mm2				2389.72					1214.75
Layer 1	a	0.184366	69	7485.11		a	0.192517	79	8207.07
	b	0.19503	83	8511.51		b	0.202612	89	8785.26
	c	0.184764	74	8010.22		c	0.176821	70	7917.61
	d	0.200943	79	7862.93		d	0.171521	73	8512.08
	e	0.194566	76	7812.26		e	0.19552	74	7569.56
						f	0.162513	65	7999.36
Mean # of RLN+ cells/mm2				7936.41					8165.16
section	WT #1	Area (mm2)	Nb Cells RLN+	RLN / mm2		Homo #1	Area (mm2)	Nb Cells PV+	RLN / mm2
Layer 2-6	a	1.24553	225	3612.92		a	1.29713	155	2389.89
	b	1.32166	223	3374.54		b	1.30433	129	1978.03
	c	1.19593	202	3378.12		c	1.30906	137	2093.1
	d	1.2761	174	2727.05		d	1.3064	96	1469.69
	e	1.27889	170	2658.56		e	1.44774	198	2735.3
	f	1.29164	180	2787.17		f	1.36676	196	2868.11
	g	1.34356	168	2500.83		g	1.36547	143	2094.51
	h	1.27189	219	3443.7
	i	1.32736	195	2938.17
Mean # of RLN+ cells/mm2				3046.79					2232.66
Layer 1	a	0.240163	73	6079.2		a	0.207477	89	8579.26
	b	0.216282	79	7305.28		b	0.216697	89	8214.23
	c	0.231633	86	7425.54		c	0.21837	70	6411.14
	d	0.222989	77	6906.17		d	0.168618	57	6760.84
	e	0.193271	67	6933.27		e	0.168804	63	7464.28
	f	0.204216	74	7247.23		f	0.200037	77	7698.58
	g	0.190124	66	6942.84		g	0.206909	68	6572.94
	h	0.220109	75	6814.81
	i	0.221678	80	7217.68
Mean # of RLN+ cells/mm2				6985.78					7385.9
	WT #2	Area (mm2)	Nb Cells RLN+	RLN/ mm2		Homo #2	Area (mm2)	Nb Cells RLN+	RLN / mm2
Layer 2-6	a	1.392	213	3060.35		a	1.33381	94	1409.5
	b	1.33989	246	3671.95		b	1.24039	105	1693.02
	c	1.34545	198	2943.25		c	1.33076	150	2254.34
	d	1.35075	179	2650.38		d	1.2317	105	1704.96
	e	1.42381	225	3160.54		e	1.2512	120	1918.16
	f	1.36732	206	3013.18		f	1.3947	136	1950.24
	g	1.46656	212	2891.12		g	1.31701	137	2080.47
	h	1.53315	248	3235.17		h	1.37861	151	2190.62
	i	1.59219	300	3768.4		i	1.48048	168	2269.53
	j	1.54089	254	3296.79
Mean # of RLN+ cells/mm2				3169.11					1941.21
Layer 1	a	0.196092	68	6935.52
	b	0.206499	71	6876.55		a	0.189631	74	7804.63
	c	0.228197	72	6310.34		b	0.168573	67	7949.08
	d	0.204409	71	6946.86		c	0.190998	69	7225.21
	e	0.186998	66	7058.9		d	0.208458	74	7099.75
	f	0.210678	64	6075.62		e	0.198049	84	8482.75
	g	0.234087	80	6835.07		f	0.200001	64	6399.97
	h	0.170895	63	7372.95		g	0.199488	64	6416.43
	i	0.182841	66	7219.39		h	0.192383	59	6133.6
	j	0.184068	63	6845.3		i	0.182425	67	7345.48
Mean # of RLN+ cells/mm2				6847.65					7206.32
%tdTomato postive /RLN+cells
Pcdhg WT						Pcdhg mut
	WT #1	RLN+ only	# RLN+,Tom+	%RLN		Homo #1	RLN+ only	# RLN+,Tom+	%RLN
Layer 2-6	a	225	161	71.5556		a	155	89	57.4194
	b	223	183	82.0628		b	129	91	70.5426
	c	202	166	82.1782		c	137	79	57.6642
	d	174	149	85.6322		d	96	71	73.9583
	e	170	154	90.5882		e	198	92	46.4646
	f	180	159	88.3333		f	196	102	52.0408
	g	168	118	70.2381		g	143	87	60.8392
	h	219	165	75.3425
	i	195	146	74.8718
Mean % tdTomato+RLN+/RLN+ cells				80.0892					59.847
Layer 1	a	73	0	0		a	89	0	0
	b	79	0	0		b	89	0	0
	c	86	1	1.16279		c	70	0	0
	d	77	0	0		d	57	0	0
	e	67	1	1.49254		e	63	0	0
	f	74	0	0		f	77	1	1.2987
	g	66	0	0		g	68	0	0
	h	75	0	0
	i	80	2	2.5
Mean % tdTomato+RLN+/RLN+ cells				0.572814					0.185529
	WT #2	RLN+ only	# RLN+,Tom+	%RLN		Homo #2	RLN+ only	# RLN+,Tom+	%RLN
Layer 2-6	a	213	159	74.6479		a	94	71	75.5319
	b	246	188	76.4228		b	105	62	59.0476
	c	198	157	79.2929		c	150	64	42.6667
	d	179	148	82.6816		d	105	76	72.381
	e	225	172	76.4444		e	120	59	49.1667
	f	206	160	77.6699		f	136	70	51.4706
	g	212	161	75.9434		g	137	68	49.635
	h	248	168	67.7419		h	151	72	47.6821
	i	300	196	65.3333		i	168	86	51.1905
	j	254	199	78.3465
Mean % tdTomato+RLN+/RLN+ cells				75.4525					55.4191
Layer 1	a	68	2	2.94118
	b	71	0	0		a	74	0	0
	c	72	0	0		b	67	1	1.49254
	d	71	0	0		c	69	0	0
	e	66	0	0		d	74	0	0
	f	64	0	0		e	84	0	0
	g	80	1	1.25		f	64	1	1.5625
	h	63	0	0		g	64	0	0
	i	66	1	1.51515		h	59	0	0
	j	63	1	1.5873		i	67	0	0
Mean % tdTomato+RLN+/RLN+ cells				0.729363					0.339449
Mean % tdTomato+RLN+/RLN+ cells
	M3	RLN+ only	# RLN+,Tom+	%RLN		M9	RLN+ only	# RLN+,Tom+	%RLN
Layer 2-6	a	229	162	70.7424		a	68	51	75
	b	163	133	81.5951		b	68	62	91.1765
	c	208	171	82.2115		c	80	59	73.75
	d	183	165	90.1639		d	91	63	69.2308
	e	159	121	76.1006		e	82	49	59.7561
	f	220	146	66.3636		f	60	52	86.6667
Mean % tdTomato+RLN+/RLN+ cells				77.8629					75.93
Layer 1	a	79	1	1.26582		a	87	0	0
	b	76	1	1.31579		b	94	0	0
	c	82	1	1.21951		c	77	0	0
	d	83	0	0		d	78	1	1.28205
	e	84	1	1.19048		e	86	0	0
	f	73	1	1.36986		f	92	0	0
Mean % tdTomato+RLN+/RLN+ cells				1.06024					0.213675
	M8	RLN+ only	# RLN+,Tom+	%RLN		M13	RLN+ only	# RLN+,Tom+	%RLN
Layer 2-6	a	163	143	87.7301		a	62	41	66.129
	b	160	147	91.875		b	77	50	64.9351
	c	144	119	82.6389		c	77	62	80.5195
	d	142	116	81.6901		d	81	72	88.8889
	e	164	152	92.6829		e	91	78	85.7143
Mean % tdTomato+RLN+/RLN+ cells				87.3234					77.2374
Layer 1	a	69	1	1.44928		a	79	0	0
	b	83	2	2.40964		b	89	0	0
	c	74	1	1.35135		c	70	1	1.42857
	d	79	0	0		d	73	1	1.36986
	e	76	2	2.63158		e	74	0	0
Mean % tdTomato+RLN+/RLN+ cells				1.56837					0.559687

## Sheet: Figure 3 - Figure supplement 2
	Figure 3- Figure supplement 2. Deeper layer Reeling positive cIN number affected by Pcdhg loss of function in Nkx2.1-derived cINs.
	Figure 3- Figure supplement 2
	Nb Cells RLN+/mm2 by layer						% tdTomato postive /RLN+cells by layer
	Nkx2.1Cre;Ai14;Pcdhg			Nkx2.1Cre;Ai14;Pcdhg			Nkx2.1Cre;Ai14;Pcdhg
	WT	mutant		WT	mutant		WT		mutant
	Layer I	Layer I		Layers II-VI	Layers II-VI		Layer I	Layers II-VI	Layer I	Layers II-VI
	6985.78	7385.9		3046.79	2232.66		0.572814	80.0892	0.185529	59.847
	6847.65	7206.32		3169.11	1941.2		0.729363	75.4525	0.339449	55.4191
	8606.22	9073.51		2774.64	1167.64		1.06024	77.8629	0.213675	75.93
	7936.4	8165.16		2389.72	1214.75		1.56837	87.3234	0.466406	78.6502
	Figure 3- Figure supplement 2. Detailed quantification (by layer) of the density of Reelin (RLN) positive cINs in visual cortex of P30 Nkx2.1Cre;Ai14 mice carrying WT, heterozygote or mutant Pcdhg.
