# Supplementary material for: Clustered gamma-protocadherins regulate cortical interneuron programmed cell death
Source: eLife. 2020 Jul 7;9:e55374. doi: 10.7554/eLife.55374 (PMC7373431; doi:10.7554/eLife.55374)
Supplement: Figure 3—figure supplement 3—source data 1. [file elife-55374-fig3-figsupp3-data1.xlsx]

## Sheet: Figure 3-Fig Suppl 3 raw data
Figure 3. - Figure supplement 3. Detailed quantifications of Nkx2.1-derived cIN ( by layer) in visual cortex (V1) of WT and Pcdh-γ deficient mice.
		section	marker	area	cells/mm2	% of cells by layer		section	marker	area	cells/mm2	% of cells by layer		section	marker	area	cells/mm2	% of cells by layer		section	marker	area	cells/mm2	% of cells by layer		section	marker	area	cells/mm2	% of cells by layer		section	marker	area	cells/mm2	% of cells by layer		section	marker	area	cells/mm2	% of cells by layer		section	marker	area	cells/mm2	% of cells by layer
		mut-1a	tomato+	area in mm2	tomato+	tomato+		mut-2a	tomato+	area in mm2	tomato+	tomato+		wt-1a	tomato+	area in mm2	tomato+	tomato+		wt-2a	tomato+	area in mm2	tomato+	tomato+		M3a	tomato+	area in mm2	tomato+	tomato+		M9a	tomato+	area in mm2	tomato+	tomato+		M8a	tomato+	area in mm2	tomato+	tomato+		M13a	tomato+	area in mm2	tomato+	tomato+
	layer	I	0	0.173543	0	0		I	1	0.168383	5.93885	0.00325733		I	2	0.200352	9.98243	0.00344828		I	3	0.179174	16.7435	0.00516351		I	3	0.158029	18.9839	0.00392157		I	1	0.158283	6.31779	0.0026738		I	5	0.199926	25.0093	0.00755287		I	3	0.134989	22.2241	0.00630252
		II/III	68	0.436105	155.926	0.178947		II/III	69	0.460232	149.924	0.224756		II/III	102	0.42242	241.466	0.175862		II/III	115	0.460275	249.85	0.197935		II/III	116	0.463442	250.301	0.151634		II/III	83	0.455984	182.024	0.221925		II/III	143	0.428996	333.337	0.216012		II/III	95	0.455638	208.499	0.19958
		IV	43	0.163885	262.379	0.113158		IV	40	0.204252	195.837	0.130293		IV	75	0.165427	453.372	0.12931		IV	88	0.202389	434.806	0.151463		IV	111	0.150253	738.756	0.145098		IV	53	0.172303	307.597	0.141711		IV	102	0.167661	608.37	0.154079		IV	42	0.159289	263.672	0.0882353
		V	144	0.350666	410.647	0.378947		V	110	0.365504	300.954	0.358306		V	250	0.351205	711.835	0.431034		V	253	0.366473	690.364	0.435456		V	379	0.382833	989.989	0.495425		V	130	0.318477	408.192	0.347594		V	270	0.348978	773.688	0.407855		V	174	0.323969	537.088	0.365546
		VI	125	0.397308	314.617	0.328947		VI	87	0.331239	262.65	0.283388		VI	151	0.356899	423.089	0.260345		VI	122	0.354149	344.488	0.209983		VI	156	0.382093	408.278	0.203922		VI	107	0.303454	352.607	0.286096		VI	142	0.353879	401.267	0.214502		VI	162	0.404507	400.487	0.340336
		total	380	1.52151	249.752	1		total	307	1.52961	200.705	1		total	580	1.4963	387.622	1		total	581	1.56246	371.849	1		total	765	1.53665	497.837	1		total	374	1.4085	265.53	1		total	662	1.49944	441.498	1		total	476	1.47839	321.971	1
		section	markers		cells/mm2	cells by %		section	markers		cells/mm2	cells by %		section	marker	area	cells/mm2	% of cells by layer		section	marker	area	cells/mm2	% of cells by layer		section	marker	area	cells/mm2	% of cells by layer		section	marker	area	cells/mm2	% of cells by layer		section	marker	area	cells/mm2	% of cells by layer		section	marker	area	cells/mm2	% of cells by layer
		mut-1ab	tomato+	area in mm2	tomato+	tomato+		mut-2b	tomato+	area in mm2	tomato+	tomato+		wt-1b	tomato+	area in mm2	tomato+	tomato+		wt-2B	tomato+	area in mm2	tomato+	tomato+		M3b	tomato+	area in mm2	tomato+	tomato+		M9b	tomato+	area in mm2	tomato+	tomato+		M8b	tomato+	area in mm2	tomato+	tomato+		M13b	tomato+	area in mm2	tomato+	tomato+
	layer	I	1	0.184146	5.43046	0.00225734		I	1	0.164107	6.09357	0.0033557		I	4	0.196216	20.3857	0.00638978		I	4	0.231233	17.2986	0.00666667		I	1	0.165258	6.05116	0.00142248		I	1	0.146467	6.82745	0.00277778		I	1	0.171634	5.82635	0.00145985		I	2	0.155364	12.873	0.00454545
		II/III	79	0.416862	189.511	0.17833		II/III	68	0.417588	162.84	0.228188		II/III	136	0.455807	298.372	0.217252		II/III	98	0.41463	236.355	0.163333		II/III	125	0.424846	294.224	0.177809		II/III	73	0.464308	157.223	0.202778		II/III	124	0.481224	257.676	0.181022		II/III	84	0.44163	190.205	0.190909
		IV	51	0.202568	251.768	0.115124		IV	30	0.148152	202.495	0.100671		IV	84	0.166926	503.218	0.134185		IV	92	0.191061	481.521	0.153333		IV	92	0.157023	585.901	0.130868		IV	45	0.172163	261.38	0.125		IV	88	0.153389	573.704	0.128467		IV	53	0.168161	315.175	0.120455
		V	161	0.336117	478.999	0.363431		V	96	0.336612	285.195	0.322148		V	277	0.368187	752.335	0.442492		V	280	0.372428	751.823	0.466667		V	335	0.362074	925.224	0.476529		V	131	0.34539	379.282	0.363889		V	310	0.369134	839.804	0.452555		V	172	0.306641	560.917	0.390909
		VI	151	0.394229	383.026	0.340858		VI	103	0.338706	304.098	0.345638		VI	125	0.354461	352.648	0.199681		VI	126	0.332525	378.919	0.21		VI	150	0.393897	380.81	0.213371		VI	110	0.359206	306.231	0.305556		VI	162	0.353233	458.621	0.236496		VI	129	0.36508	353.347	0.293182
		total	443	1.53392	288.802	1		total	298	1.40517	212.075	1		total	626	1.5416	406.072	1		total	600	1.54188	389.136	1		total	703	1.5031	467.701	1		total	360	1.48753	242.011	1		total	685	1.52861	448.119	1		total	440	1.43688	306.22	1
									CellCounter_mut-2c - Ai14-layers1-6
		section	markers		cells/mm2	cells by %		section	markers		cells/mm2	cells by %		section	marker	area	cells/mm2	% of cells by layer		section	marker	area	cells/mm2	% of cells by layer		section	marker	area	cells/mm2	% of cells by layer		section	marker	area	cells/mm2	% of cells by layer		section	marker	area	cells/mm2	% of cells by layer		section	marker	area	cells/mm2	% of cells by layer
		mut-1c	tomato+	area in mm2	tomato+	tomato+		mut-2c	tomato+	area in mm2	tomato+	tomato+		wt-1c	tomato+	area in mm2	tomato+	tomato+		wt-2c	tomato+	area in mm2	tomato+	tomato+		M3c	tomato+	area in mm2	tomato+	tomato+		M9c	tomato+	area in mm2	tomato+	tomato+		M8c	tomato+	area in mm2	tomato+	tomato+		M13c	tomato+	area in mm2	tomato+	tomato+
	layer	I	0	0.19722	0	0		I	1	0.181564	5.5077	0.00303951		I	5	0.166199	30.0844	0.00822368		I	4	0.212429	18.8298	0.0064		I	1	0.166742	5.99728	0.00151515		I	1	0.163443	6.11834	0.00307692		I	2	0.190248	10.5126	0.00304878		I	4	0.167324	23.9057	0.00907029
		II/III	78	0.46096	169.212	0.202597		II/III	68	0.479068	141.942	0.206687		II/III	121	0.433021	279.432	0.199013		II/III	109	0.456408	238.822	0.1744		II/III	93	0.445174	208.907	0.140909		II/III	76	0.446031	170.392	0.233846		II/III	151	0.189741	795.82	0.230183		II/III	102	0.420342	242.66	0.231293
		IV	39	0.140684	277.216	0.101299		IV	51	0.206667	246.774	0.155015		IV	94	0.17415	539.765	0.154605		IV	76	0.177275	428.712	0.1216		IV	110	0.163537	672.631	0.166667		IV	43	0.184062	233.617	0.132308		IV	81	0.154752	523.416	0.123476		IV	26	0.157431	165.152	0.0589569
		V	138	0.353253	390.655	0.358442		V	125	0.331885	376.636	0.379939		V	257	0.327974	783.598	0.422697		V	285	0.376305	757.364	0.456		V	321	0.380468	843.698	0.486364		V	113	0.282549	399.931	0.347692		V	255	0.342159	745.267	0.38872		V	171	0.297504	574.783	0.387755
		VI	130	0.378848	343.145	0.337662		VI	84	0.326815	257.026	0.255319		VI	131	0.324576	403.603	0.215461		VI	151	0.363291	415.645	0.2416		VI	135	0.391933	344.446	0.204545		VI	92	0.312133	294.746	0.283077		VI	167	0.374435	446.005	0.254573		VI	138	0.329546	418.758	0.312925
		total	385	1.53097	251.475	1		total	329	1.526	215.596	1		total	608	1.42592	426.391	1		total	625	1.58571	394.146	1		total	660	1.54785	426.397	1		total	325	1.38822	234.113	1		total	656	1.25134	524.24	1		total	441	1.37215	321.394	1
									CellCounter_mut-2d - Ai14-layers1-6
		section	markers		cells/mm2	cells by %		section	markers		cells/mm2	cells by %		section	marker	area	cells/mm2	% of cells by layer		section	marker	area	cells/mm2	% of cells by layer		section	marker	area	cells/mm2	% of cells by layer		section	marker	area	cells/mm2	% of cells by layer		section	marker	area	cells/mm2	% of cells by layer		section	marker	area	cells/mm2	% of cells by layer
		mut-1d	tomato+	area in mm2	tomato+	tomato+		mut-2d	tomato+	area in mm2	tomato+	tomato+		wt-1d	tomato+	area in mm2	tomato+	tomato+		wt-2d	tomato+	area in mm2	tomato+	tomato+		M3d	tomato+	area in mm2	tomato+	tomato+		M9d	tomato+	area in mm2	tomato+	tomato+		M8d	tomato+	area in mm2	tomato+	tomato+		M13d	tomato+	area in mm2	tomato+	tomato+
	layer	I	3	0.182639	16.4259	0.00925926		I	1	0.176125	5.67779	0.00337838		I	2	0.20904	9.56754	0.00324675		I	2	0.157749	12.6783	0.00338983		I	1	0.172012	5.81354	0.00142045		I	0	0.161424	0	0		I	1	0.159791	6.25818	0.00155521		I	2	0.17387	11.5028	0.00456621
		II/III	62	0.434939	142.549	0.191358		II/III	60	0.40494	148.17	0.202703		II/III	137	0.454032	301.741	0.222403		II/III	108	0.512435	210.759	0.183051		II/III	100	0.439098	227.74	0.142045		II/III	76	0.469452	161.891	0.22619		II/III	158	0.475597	332.214	0.245723		II/III	103	0.417455	246.733	0.23516
		IV	47	0.204449	229.887	0.145062		IV	39	0.187304	208.218	0.131757		IV	95	0.16369	580.364	0.154221		IV	70	0.167537	417.817	0.118644		IV	110	0.172058	639.32	0.15625		IV	41	0.191657	213.924	0.122024		IV	95	0.155625	610.44	0.147745		IV	47	0.157633	298.162	0.107306
		V	120	0.344524	348.307	0.37037		V	91	0.326178	278.989	0.307432		V	253	0.343438	736.669	0.410714		V	293	0.389017	753.181	0.49661		V	310	0.354839	873.636	0.440341		V	110	0.331739	331.586	0.327381		V	240	0.351225	683.322	0.37325		V	148	0.289042	512.036	0.3379
		VI	92	0.301928	304.708	0.283951		VI	105	0.345092	304.267	0.35473		VI	129	0.323541	398.713	0.209416		VI	117	0.35853	326.333	0.198305		VI	183	0.398956	458.697	0.259943		VI	109	0.315061	345.965	0.324405		VI	149	0.355783	418.795	0.231726		VI	138	0.341371	404.252	0.315068
		total	324	1.46848	220.637	1		total	296	1.43964	205.607	1		total	616	1.49374	412.387	1		total	590	1.58527	372.177	1		total	704	1.53696	458.046	1		total	336	1.46933	228.675	1		total	643	1.49802	429.233	1		total	438	1.37937	317.536	1
		section	markers		cells/mm2	cells by %		section	markers		cells/mm2	cells by %		section	marker	area	cells/mm2	% of cells by layer		section	marker	area	cells/mm2	% of cells by layer		section	marker	area	cells/mm2	% of cells by layer		section	marker	area	cells/mm2	% of cells by layer		section	marker	area	cells/mm2	% of cells by layer		section	marker	area	cells/mm2	% of cells by layer
		mut-1e	tomato+	area in mm2	tomato+	tomato+		mut-2e	tomato+	area in mm2	tomato+	tomato+		wt-1e	tomato+	area in mm2	tomato+	tomato+		wt-2e	tomato+	area in mm2	tomato+	tomato+		M3e	tomato+	area in mm2	tomato+	tomato+		M9e	tomato+	area in mm2	tomato+	tomato+		M8e	tomato+	area in mm2	tomato+	tomato+		M13e	tomato+	area in mm2	tomato+	tomato+
	layer	I	1	0.168724	5.92683	0.00236967		I	0	0.179612	0	0		I	2	0.20756	9.63576	0.00334448		I	0	0.206903	0	0		I	2	0.179869	11.1192	0.00294551		I	0	0.14885	0	0		I	1	0.189769	5.26957	0.00140845		I	2	0.158324	12.6323	0.0046729
		II/III	83	0.448082	185.234	0.196682		II/III	68	0.420839	161.582	0.221498		II/III	133	0.410274	324.173	0.222408		II/III	110	0.513963	214.023	0.187075		II/III	100	0.424778	235.417	0.147275		II/III	89	0.454089	195.997	0.234211		II/III	156	0.481817	323.774	0.219718		II/III	86	0.41007	209.72	0.200935
		IV	46	0.215213	213.742	0.109005		IV	48	0.197967	242.465	0.156352		IV	79	0.157981	500.061	0.132107		IV	75	0.176773	424.272	0.127551		IV	136	0.173389	784.363	0.200295		IV	46	0.167927	273.929	0.121053		IV	120	0.190477	629.998	0.169014		IV	42	0.168891	248.68	0.0981308
		V	168	0.415986	403.859	0.398104		V	115	0.359909	319.525	0.374593		V	233	0.332348	701.072	0.389632		V	276	0.393358	701.65	0.469388		V	313	0.347628	900.387	0.460972		V	140	0.306517	456.744	0.368421		V	279	0.339458	821.899	0.392958		V	148	0.319724	462.9	0.345794
		VI	124	0.363344	341.275	0.293839		VI	76	0.296003	256.754	0.247557		VI	151	0.346249	436.102	0.252508		VI	127	0.366723	346.31	0.215986		VI	128	0.320333	399.584	0.188513		VI	105	0.303724	345.708	0.276316		VI	154	0.383506	401.558	0.216901		VI	150	0.362913	413.322	0.350467
		total	422	1.61135	261.892	1		total	307	1.45433	211.094	1		total	598	1.45441	411.163	1		total	588	1.65772	354.704	1		total	679	1.446	469.572	1		total	380	1.38111	275.141	1		total	710	1.58503	447.942	1		total	428	1.41992	301.425	1
[truncated: 20 more columns]

## Sheet: Figure 3- Figure Supplement 3
	Figure 3. - Figure supplement 3 source data. Layers IV-VI show reduced number of Nkx2.1-derived cINs in Pcdhg-deficient mice.
	Nkx2.1Cre;Ai14;Pcdhg					Nkx2.1Cre;Ai14;Pcdhg
	Pcdhg WT					Pcdhg mutant
			mean # of tomato+ cells/mm2	mean % of tomato+ cells/mm2				mean # of tomato+ cells/mm2	mean % of tomato+ cells by layer
	layer	I	15.9311	0.00493059		layer	I	5.55663	0.00277725
		II/III	289.037	0.207388			II/III	168.486	0.189583
		IV	515.356	0.140886			IV	246.998	0.116729
		V	737.102	0.419314			V	406.493	0.373859
		VI	402.831	0.227482			VI	337.354	0.317051
	total	total	408.727	1			total	254.512	1
	layer	I	13.11	0.004324		layer	I	4.64358	0.00260619
		II/III	229.962	0.181159			II/III	152.892	0.216766
		IV	437.426	0.134518			IV	219.158	0.134818
		V	730.876	0.464824			V	312.26	0.348484
		VI	362.339	0.215175			VI	276.959	0.297326
	total	total	376.402	1			total	209.015	1
	layer	I	9.59301	0.00224503		layer	I	3.85272	0.0017057
		II/III	243.318	0.151935			II/III	173.505	0.22379
		IV	684.194	0.159835			IV	258.089	0.128419
		V	906.587	0.471926			V	395.147	0.350995
		VI	398.363	0.214059			VI	329.051	0.29509
	total	total	463.91	1		total	total	249.094	1
	layer	I	10.5752	0.00300503		layer	I	16.6276	0.00583148
		II/III	408.564	0.218532			II/III	219.563	0.211575
		IV	589.186	0.144556			IV	258.168	0.0946167
		V	772.796	0.403067			V	529.545	0.365581
		VI	425.249	0.23084			VI	398.033	0.322396
	total	total	458.206	1		total	total	313.709	1
	layer	I	12.1725	0.00251848		layer	I	5.05395	0.0026829
		II/III	280.609	0.100919			II/III	122.056	0.139959
		IV	666.304	0.184528			IV	243.156	0.194575
		V	1237.35	0.445706			V	303.73	0.320374
		VI	718.815	0.266328			VI	247.483	0.342408
	total	total	638.127	1		total	total	199.18	1
	layer	I	15.6459	0.00259788		layer	I	8.21811	0.00374216
		II/III	384.661	0.141682			II/III	133.676	0.114133
		IV	723.823	0.226947			IV	222.076	0.181762
		V	1118.03	0.41734			V	394.748	0.408764
		VI	630.627	0.211432			VI	285.779	0.291599
	total	total	641.782	1		total	total	236.432	1
	Figure 3. - Figure supplement 3 source data. Quantifications of Nkx2.1-derived cIN (by layer) in visual cortex (V1) of WT (left table) and Pcdhg-deficient (right table) P30 mice (column F and K). Percentage of Nkx2.1-derived cINs by layer in WT and mutant mice (column G and L).
