# Supplementary material for: Clustered gamma-protocadherins regulate cortical interneuron programmed cell death
Source: eLife. 2020 Jul 7;9:e55374. doi: 10.7554/eLife.55374 (PMC7373431; doi:10.7554/eLife.55374)
Supplement: Figure 3—figure supplement 4—source data 1. [file elife-55374-fig3-figsupp4-data1.xlsx]

## Sheet: Figure 3-Fig Suppl 4A′ raw data
Figure 3. - Figure supplement 4A. Detailed quantification of SST positive non-recombined (non-Nkx2.1-derived) cINs in visual cortex of WT and Pcdhg deficient mice.
		mut-1					mut-2					wt-1					wt-2					M3					M9					M8					M13					N1					N5
		section					section					section					section					section					section					section					section					section					section
		a	SST+tomato-	area / mm2	SST+tomato-/mm2		a	SST+tomato-	area / mm2	SST+tomato-/mm2		a	SST+tomato-	area / mm2	SST+tomato-/mm2		a	SST+tomato-	area / mm2	SST+tomato-/mm2		a	SST+tomato-	area / mm2	SST+tomato-/mm2		a	SST+tomato-	area / mm2	SST+tomato-/mm2		a	SST+tomato-	area / mm2	SST+tomato-/mm2		a	sst+/ tom-	area / mm2	SST+tomato-/mm2		a	sst+/ tom-	area / mm2	SST+tomato-/mm2		a	sst+/ tom-	area / mm2
	layer	I	0	0.173543	0		I	1	0.168383	5.93885		I	0	0.200352	0		I	0	0.179174	0		I	0	0.156656	0		I	0	0.158283	0		I	1	0.199926	5.00185		I	1	0.134989	7.40804		I	1	0.183045	5.46313		I	0	0.158235
		II/III	22	0.436105	50.4465		II/III	13	0.460232	28.2466		II/III	7	0.42242	16.5712		II/III	10	0.460275	21.7261		II/III	7	0.365791	19.1366		II/III	12	0.455984	26.3167		II/III	10	0.428996	23.3103		II/III	15	0.455638	32.9209		II/III	11	0.359694	30.5816		II/III	8	0.308229
		IV	10	0.163885	61.0183		IV	8	0.204252	39.1674		IV	2	0.165427	12.0899		IV	4	0.202389	19.7639		IV	12	0.249013	48.1903		IV	7	0.172303	40.6261		IV	10	0.167661	59.6441		IV	3	0.159289	18.8337		IV	10	0.301443	33.1738		IV	10	0.252825
		V	8	0.350666	22.8137		V	13	0.365504	35.5673		V	6	0.351205	17.084		V	3	0.366473	8.18613		V	11	0.398335	27.615		V	14	0.318477	43.9592		V	6	0.348978	17.1931		V	10	0.323969	30.8671		V	13	0.386315	33.6513		V	3	0.327947
		VI	6	0.397308	15.1016		VI	4	0.331239	12.0759		VI	3	0.356899	8.40575		VI	1	0.354149	2.82367		VI	3	0.388148	7.72901		VI	3	0.303454	9.88618		VI	5	0.353879	14.1291		VI	7	0.404507	17.305		VI	4	0.44617	8.96518		VI	1	0.371915
		total	46	1.52151	30.2332		total	39	1.52961	25.4967		total	18	1.4963	12.0297		total	18	1.56246	11.5203		total	33	1.55794	21.1818		total	36	1.4085	25.5591		total	32	1.49944	21.3413		total	36	1.47839	24.3508		total	39	1.67667	23.2604		total	22	1.41915
		b	SST+tomato-	area / mm2	SST+tomato-/mm2		b	SST+tomato-	area / mm2	SST+tomato-/mm2		b	sst+/ tom-	area / mm2	SST+tomato-/mm2		b	sst+/ tom-	area / mm2	SST+tomato-/mm2		b	sst+/ tom-	area / mm2	SST+tomato-/mm2		b	sst+/ tom-	area / mm2	SST+tomato-/mm2		b	sst+/ tom-	area / mm2	SST+tomato-/mm2		b	sst+/ tom-	area / mm2	SST+tomato-/mm2		b	sst+/ tom-	area / mm2	SST+tomato-/mm2		b	sst+/ tom-	area / mm2
	layer	I	0	0.184146	0		I	0	0.164107	0		I	0	0.196216	0		I	1	0.231233	4.32464		I	0	0.194878	0		I	0	0.146467	0		I	1	0.171634	5.82635		I	1	0.155364	6.43649		I	0	0.125778	0		I	0	0.156966
		II/III	23	0.416862	55.1742		II/III	20	0.417588	55.1742		II/III	5	0.455807	10.9695		II/III	7	0.41463	16.8825		II/III	13	0.292598	44.4295		II/III	20	0.464308	43.0749		II/III	9	0.481224	18.7023		II/III	17	0.44163	38.4938		II/III	9	0.247114	36.4205		II/III	5	0.360496
		IV	12	0.202568	59.2395		IV	6	0.148152	59.2395		IV	3	0.166926	17.9721		IV	3	0.191061	15.7018		IV	7	0.26182	26.7359		IV	6	0.172163	34.8506		IV	3	0.153389	19.5581		IV	7	0.168161	41.6269		IV	11	0.183312	60.0069		IV	4	0.266385
		V	10	0.336117	29.7515		V	9	0.336612	29.7515		V	9	0.368187	24.4441		V	2	0.372428	5.37016		V	2	0.341078	5.86377		V	17	0.34539	49.2198		V	14	0.369134	37.9267		V	20	0.306641	65.2229		V	9	0.26146	34.422		V	2	0.390643
		VI	7	0.394229	17.7562		VI	2	0.338706	17.7562		VI	3	0.354461	8.46356		VI	1	0.332525	3.0073		VI	4	0.427419	9.35849		VI	3	0.359206	8.35176		VI	4	0.353233	11.324		VI	4	0.36508	10.9565		VI	2	0.229761	8.70471		VI	0	0.357806
		total	52	1.53392	33.9		total	37	1.40517	26.3314		total	20	1.5416	12.9736		total	14	1.54188	9.07984		total	26	1.51779	17.1301		total	46	1.48753	30.9237		total	31	1.52861	20.2798		total	49	1.43688	34.1018		total	31	1.04743	29.5964		total	11	1.5323
		c	SST+tomato-	area / mm2	SST+tomato-/mm2		c	SST+tomato-	area / mm2	SST+tomato-/mm2		c	sst+/ tom-	area / mm2	SST+tomato-/mm2		c	sst+/ tom-	area / mm2	SST+tomato-/mm2		c	sst+/ tom-	area / mm2	SST+tomato-/mm2		c	sst+/ tom-	area / mm2	SST+tomato-/mm2		c	sst+/ tom-	area / mm2	SST+tomato-/mm2		c	sst+/ tom-	area / mm2	SST+tomato-/mm2		c	sst+/ tom-	area / mm2	SST+tomato-/mm2		c	sst+/ tom-	area / mm2
	layer	I	0	0.19722	0		I	2	0.181564	0		I	0	0.166199	0		I	0	0.212429	0		I	0	0.172509	0		I	0	0.163443	0		I	0	0.190248	0		I	0	0.167324	0		I	1	0.150578	6.64108		I	0	0.188852
		II/III	22	0.46096	47.7264		II/III	17	0.479068	47.7264		II/III	9	0.433021	20.7842		II/III	7	0.456408	15.3372		II/III	5	0.369997	13.5136		II/III	22	0.446031	49.3239		II/III	15	0.189741	79.0549		II/III	17	0.420342	40.4433		II/III	17	0.333676	50.9477		II/III	8	0.352481
		IV	9	0.140684	63.9729		IV	8	0.206667	63.9729		IV	4	0.17415	22.9687		IV	2	0.177275	11.2819		IV	9	0.277788	32.3988		IV	11	0.184062	59.7626		IV	4	0.154752	25.8477		IV	7	0.157431	44.464		IV	10	0.211787	47.2173		IV	5	0.230057
		V	14	0.353253	39.6316		V	2	0.331885	39.6316		V	5	0.327974	15.2451		V	3	0.376305	7.97226		V	1	0.335673	2.97909		V	11	0.282549	38.9313		V	5	0.342159	14.6131		V	13	0.297504	43.6969		V	6	0.316296	18.9696		V	2	0.35387
		VI	5	0.378848	13.1979		VI	4	0.326815	13.1979		VI	6	0.324576	18.4856		VI	2	0.363291	5.50523		VI	3	0.39781	7.54128		VI	5	0.312133	16.0188		VI	6	0.374435	16.0241		VI	9	0.329546	27.3103		VI	3	0.342145	8.7682		VI	1	0.389211
		total	50	1.53097	32.6591		total	33	1.526	21.6252		total	24	1.42592	16.8312		total	14	1.58571	8.82887		total	18	1.55378	11.5847		total	49	1.38822	35.2971		total	30	1.25134	23.9744		total	46	1.37215	33.5241		total	37	1.35448	27.3167		total	16	1.51447
		d	SST+tomato-	area / mm2	SST+tomato-/mm2		d	SST+tomato-	area / mm2	SST+tomato-/mm2		d	sst+/ tom-	area / mm2	SST+tomato-/mm2		d	sst+/ tom-	area / mm2	SST+tomato-/mm2		d	sst+/ tom-	area / mm2	SST+tomato-/mm2		d	sst+/ tom-	area / mm2	SST+tomato-/mm2		d	sst+/ tom-	area / mm2	SST+tomato-/mm2		d	sst+/ tom-	area / mm2	SST+tomato-/mm2		d	sst+/ tom-	area / mm2	SST+tomato-/mm2		d	sst+/ tom-	area / mm2
	layer	I	0	0.182639	0		I	0	0.176125	0		I	1	0.20904	4.78377		I	0	0.157749	0		I	0	0.153449	0		I	0	0.161424	0		I	0	0.159791	0		I	1	0.17387	5.75141		I		0.174087	0		I	0	0.155305
		II/III	15	0.434939	34.4876		II/III	24	0.40494	34.4876		II/III	16	0.454032	35.2398		II/III	10	0.512435	19.5147		II/III	5	0.348192	14.3599		II/III	28	0.469452	59.6441		II/III	7	0.475597	14.7184		II/III	17	0.417455	40.723		II/III	11	0.289227	38.0324		II/III	4	0.369651
		IV	10	0.204449	48.912		IV	6	0.187304	48.912		IV	2	0.16369	12.2182		IV	3	0.167537	17.9065		IV	14	0.29332	47.7295		IV	8	0.191657	41.7413		IV	3	0.155625	19.2771		IV	7	0.157633	44.4071		IV	6	0.241365	24.8586		IV	2	0.264075
		V	9	0.344524	26.123		V	13	0.326178	26.123		V	12	0.343438	34.9408		V	2	0.389017	5.14117		V	1	0.360755	2.77197		V	11	0.331739	33.1586		V	11	0.351225	31.3189		V	7	0.289042	24.2179		V	10	0.299591	33.3788		V	1	0.329523
		VI	6	0.301928	19.8723		VI	7	0.345092	19.8723		VI	2	0.323541	6.1816		VI	1	0.35853	2.78917		VI	6	0.389635	15.399		VI	8	0.315061	25.3919		VI	7	0.355783	19.6749		VI	5	0.341371	14.6468		VI	4	0.318454	12.5607		VI	2	0.411535
		total	40	1.46848	27.2391		total	50	1.43964	34.7309		total	33	1.49374	22.0922		total	16	1.58527	10.0929		total	26	1.54535	16.8247		total	55	1.46933	37.432		total	28	1.49802	18.6913		total	37	1.37937	26.8238		total	31	1.32273	23.4365		total	9	1.53009
		e	SST+tomato-	area / mm2	SST+tomato-/mm2		e	SST+tomato-	area / mm2	SST+tomato-/mm2		e	sst+/ tom-	area / mm2	SST+tomato-/mm2		e	sst+/ tom-	area / mm2	SST+tomato-/mm2		e	sst+/ tom-	area / mm2	SST+tomato-/mm2		e	sst+/ tom-	area / mm2	SST+tomato-/mm2		e	sst+/ tom-	area / mm2	SST+tomato-/mm2		e	sst+/ tom-	area / mm2	SST+tomato-/mm2		e	sst+/ tom-	area / mm2	SST+tomato-/mm2		e	sst+/ tom-	area / mm2
	layer	I	0	0.168724	0		I	3	0.179612	0		I	3	0.20756	14.4536		I	0	0.206903	0		I	1	0.16235	6.15953		I	0	0.14885	0		I	0	0.189769	0		I	0	0.158324	0		I	1	0.172909	5.7834		I	0	0.171469
		II/III	16	0.448082	35.7078		II/III	10	0.420839	35.7078		II/III	6	0.410274	14.6244		II/III	6	0.513963	11.674		II/III	5	0.344476	14.5148		II/III	28	0.454089	61.6619		II/III	8	0.481817	16.6038		II/III	18	0.41007	43.8949		II/III	19	0.262852	72.2841		II/III	6	0.338051
		IV	13	0.215213	60.4053		IV	9	0.197967	60.4053		IV	4	0.157981	25.3195		IV	1	0.176773	5.65696		IV	6	0.24125	24.8705		IV	15	0.167927	89.3246		IV	2	0.190477	10.5		IV	4	0.168891	23.6838		IV	9	0.236219	38.1003		IV	4	0.255799
		V	12	0.415986	28.8471		V	6	0.359909	28.8471		V	5	0.332348	15.0445		V	5	0.393358	12.7111		V	5	0.345935	14.4536		V	15	0.306517	48.9369		V	4	0.339458	11.7835		V	25	0.319724	78.1925		V	12	0.260819	46.009		V	3	0.31384
		VI	5	0.363344	13.7611		VI	1	0.296003	13.7611		VI	1	0.346249	2.8881		VI	4	0.366723	10.9074		VI	1	0.344826	2.90001		VI	5	0.303724	16.4623		VI	4	0.383506	10.4301		VI	9	0.362913	24.7993		VI	5	0.313413	15.9534		VI	1	0.387481
		total	46	1.61135	28.5475		total	29	1.45433	19.9405		total	19	1.45441	13.0637		total	16	1.65772	9.65181		total	18	1.43884	12.5101		total	63	1.38111	45.6156		total	18	1.58503	11.3563		total	56	1.41992	39.4388		total	46	1.24621	36.9119		total	14	1.46664
[truncated: 1 more columns]

## Sheet: Figure 3-Fig Suppl 4A′ 
	Figure 3 - Figure supplement 4A' source data. Increased survival of non-recombined (non-Nkx2.1-derived) SST cINs in visual cortex of WT and Pcdhg deficient mice.
	Nkx2.1Cre;Ai14;Pcdhg		Nkx2.1Cre;Ai14;Pcdhg
	Pcdhg WT		Pcdhg mutant
	mean # of SST+tomato-/mm2		mean # of SST+tomato-/mm2
	15.3981		30.5158
	9.83475		25.6249
	15.8463		34.9655
	19.1286		31.6478
	9.73468		28.1044
	Figure 3 - Figure supplement 4A'. Quantification of SST positive non-recombined (non-Nkx2.1-derived) cINs in visual cortex of WT and Pcdhg deficient mice.

## Sheet: Figure 3-Fig Suppl 4B′ raw data
Figure 3. - Figure supplement 4B'. Detailed quantification of PV positive non-recombined (non-Nkx2.1-derived) GABAergic cINs in WT and Pcdhg-deficient mice.
		WT1					WT2					Mut1					Mut2					N38					N7					N6					N32
		section					section					section					section					section					section					section					section
		a	PV+tomato-	area / mm2	PV+tomato-/mm2		a	PV+tomato-	area / mm2	PV+tomato-/mm2		a	PV+tomato-	area / mm2	PV+tomato-/mm2		a	PV+tomato-	area / mm2	PV+tomato-/mm2		a	PV+tomato-	area / mm2	PV+tomato-/mm2		a	PV+tomato-	area / mm2	PV+tomato-/mm2		a	PV+tomato-	area / mm2	PV+tomato-/mm2		a	PV+tomato-	area / mm2	PV+tomato-/mm2
	layer	I	0	0.216435	0		I	0	0.159075	0		I	2	0.165168	12.1089		I	0	0.171364	0		I	0	0.110518	0		I	0	0.127775	0		I	0	0.129027	0		I	0	0.201005	0
		II/III	17	0.411892	41.273		II/III	6	0.431074	13.9187		II/III	21	0.384853	54.5663		II/III	25	0.349013	71.6306		II/III	14	0.285529	49.0318		II/III	6	0.27619	21.7241		II/III	9	0.257725	34.9209		II/III	13	0.333374	38.9952
		IV	8	0.16318	49.0258		IV	6	0.202955	29.5633		IV	13	0.174164	74.6421		IV	11	0.274077	40.1347		IV	13	0.208599	62.3205		IV	5	0.219645	22.764		IV	6	0.217231	27.6204		IV	11	0.401633	27.3882
		V	11	0.36118	30.4557		V	4	0.353809	11.3055		V	7	0.37402	18.7156		V	7	0.32837	21.3174		V	3	0.228094	13.1525		V	4	0.266153	15.029		V	5	0.258244	19.3615		V	12	0.49805	24.094
		VI	12	0.398522	30.1113		VI	2	0.419731	4.76495		VI	6	0.492899	12.1729		VI	2	0.32124	6.22588		VI	1	0.257646	3.88129		VI	0	0.280463	0		VI	2	0.232304	8.60942		VI	1	0.375513	2.66302
		total	48	1.55121	30.9436		total	18	1.56664	11.4895		total	49	1.5911	30.7962		total	45	1.44406	31.1621		total	31	1.09039	28.4303		total	15	1.17023	12.818		total	22	1.09453	20.0999		total	37	1.80958	20.4468
																							markers
		b	PV+tomato-	area / mm2	PV+tomato-/mm2		b	PV+tomato-	area / mm2	PV+tomato-/mm2		b	PV+tomato-	area / mm2	PV+tomato-/mm2		b	PV+tomato-	area / mm2	PV+tomato-/mm2		b	PV+tomato-	area / mm2	PV+tomato-/mm2		b	PV+tomato-	area / mm2	PV+tomato-/mm2		b	PV+tomato-	area / mm2	PV+tomato-/mm2		b	PV+tomato-	area / mm2	PV+tomato-/mm2
	layer	I	0	0.184146	0		I	0	0.184387	0		I	1	0.163652	6.11051		I	0	0.178517	0		I	0	0.157358	0		I	0	0.141354	0		I	0	0.127854	0		I	0	0.121138	0
		II/III	9	0.416862	21.5899		II/III	7	0.366134	19.1187		II/III	35	0.320682	109.142		II/III	26	0.350315	74.219		II/III	2	0.237371	8.42563		II/III	4	0.272254	14.6921		II/III	5	0.242418	20.6255		II/III	9	0.237347	37.9192
		IV	9	0.202568	44.4296		IV	7	0.278457	25.1385		IV	7	0.201178	34.7951		IV	17	0.254022	66.9233		IV	7	0.252537	27.7187		IV	6	0.221717	27.0616		IV	6	0.213948	28.0442		IV	13	0.205336	63.3108
		V	7	0.336117	20.8261		V	10	0.440468	22.7031		V	12	0.356178	33.691		V	4	0.326325	12.2577		V	4	0.252947	15.8136		V	2	0.269116	7.43175		V	2	0.26467	7.55657		V	10	0.300354	33.294
		VI	4	0.394229	10.1464		VI	3	0.446274	6.72233		VI	5	0.381931	13.0914		VI	2	0.338666	5.90552		VI	5	0.394416	12.677		VI	0	0.263298	0		VI	1	0.259756	3.84976		VI	1	0.336324	2.97332
		total	29	1.53392	18.9058		total	27	1.71572	15.7368		total	60	1.42362	42.1461		total	49	1.44784	33.8434		total	18	1.29463	13.9036		total	12	1.16774	10.2763		total	14	1.10865	12.628		total	33	1.2005	27.4886
		c	PV+tomato-	area / mm2	PV+tomato-/mm2		c	PV+tomato-	area / mm2	PV+tomato-/mm2		c	PV+tomato-	area / mm2	PV+tomato-/mm2		c	PV+tomato-	area / mm2	PV+tomato-/mm2		c	PV+tomato-	area / mm2	PV+tomato-/mm2		c	PV+tomato-	area / mm2	PV+tomato-/mm2		c	PV+tomato-	area / mm2	PV+tomato-/mm2		c	PV+tomato-	area / mm2	PV+tomato-/mm2
	layer	I	0	0.183779	0		I	0	0.157211	0		I	3	0.137427	21.8298		I	1	0.181823	5.49986		I	1	0.127729	7.82911		I	0	0.146107	0		I	0	0.116259	0		I	0	0.169028	0
		II/III	6	0.388058	15.4616		II/III	9	0.378388	23.7851		II/III	29	0.335721	86.3813		II/III	15	0.349832	42.8777		II/III	9	0.287551	31.2988		II/III	7	0.273611	25.5837		II/III	6	0.278974	21.5074		II/III	19	0.371326	51.168
		IV	3	0.167631	17.8965		IV	4	0.263616	15.1736		IV	25	0.29109	85.884		IV	17	0.266235	63.8533		IV	11	0.248526	44.261		IV	8	0.198158	40.3717		IV	7	0.24686	28.3562		IV	17	0.324027	52.4648
		V	8	0.354869	22.5435		V	3	0.396864	7.55926		V	17	0.337792	50.3269		V	11	0.354151	31.0602		V	3	0.259377	11.5662		V	2	0.254434	7.86059		V	5	0.248802	20.0963		V	9	0.423794	21.2367
		VI	3	0.387925	7.73346		VI	1	0.414518	2.41244		VI	5	0.407718	12.2634		VI	3	0.360248	8.3276		VI	2	0.438226	4.56385		VI	0	0.287574	0		VI	0	0.216922	0		VI	2	0.469367	4.26106
		total	20	1.48226	13.4929		total	17	1.6106	10.5551		total	79	1.50975	52.3266		total	47	1.51229	31.0787		total	26	1.36141	19.0979		total	17	1.15989	14.6566		total	18	1.10782	16.2482		total	47	1.75754	26.7419
																							markers
		d	PV+tomato-	area / mm2	PV+tomato-/mm2		d	PV+tomato-	area / mm2	PV+tomato-/mm2		d	PV+tomato-	area / mm2	PV+tomato-/mm2		d	PV+tomato-	area / mm2	PV+tomato-/mm2		d	PV+tomato-	area / mm2	PV+tomato-/mm2		d	PV+tomato-	area / mm2	PV+tomato-/mm2		d	PV+tomato-	area / mm2	PV+tomato-/mm2		d	PV+tomato-	area / mm2	PV+tomato-/mm2
	layer	I	2	0.191474	10.4453		I	0	0.183469	0		I	0	0.166088	0		I	4	0.17714	22.5811		I	0	0.172012	0		I	0	0.15574	0		I	2	0.103692	19.2879		I	1	0.175634	5.69366
		II/III	6	0.347865	17.2481		II/III	7	0.38562	18.1526		II/III	15	0.356152	42.1168		II/III	23	0.355253	64.7427		II/III	25	0.439098	56.9349		II/III	3	0.279008	10.7524		II/III	3	0.237397	12.6371		II/III	14	0.265875	52.6564
		IV	9	0.224366	40.113		IV	7	0.272902	25.6503		IV	10	0.264431	37.8171		IV	14	0.27803	50.3542		IV	17	0.172058	98.8039		IV	2	0.22009	9.08721		IV	11	0.223525	49.2115		IV	7	0.248358	28.1851
		V	8	0.368877	21.6874		V	5	0.408076	12.2526		V	8	0.391878	20.4145		V	7	0.380964	18.3744		V	9	0.354839	25.3636		V	0	0.264058	0		V	4	0.29052	13.7684		V	5	0.32061	15.5953
		VI	2	0.371823	5.37891		VI	7	0.443825	15.772		VI	5	0.444438	11.2502		VI	9	0.406635	22.1329		VI	3	0.398956	7.51963		VI	0	0.292858	0		VI	0	0.236974	0		VI	4	0.319193	12.5316
		total	27	1.50441	17.9473		total	26	1.69389	15.3493		total	38	1.62299	23.4136		total	57	1.59802	35.6691		total	54	1.53696	35.1342		total	5	1.21175	4.12625		total	20	1.09211	18.3132		total	31	1.32967	23.314
																							markers
		e	PV+tomato-	area / mm2	PV+tomato-/mm2		e	PV+tomato-	area / mm2	PV+tomato-/mm2		e	PV+tomato-	area / mm2	PV+tomato-/mm2		e	PV+tomato-	area / mm2	PV+tomato-/mm2		e	PV+tomato-	area / mm2	PV+tomato-/mm2		e	PV+tomato-	area / mm2	PV+tomato-/mm2		e	PV+tomato-	area / mm2	PV+tomato-/mm2
	layer	I	1	0.179197	5.58047		I	1	0.170865	5.85256		I	1	0.175916	5.68453		I	1	0.169061	5.91502		I	0	0.189138	0		I	0	0.15936	0		I	0	0.129364	0
		II/III	12	0.385583	31.1217		II/III	4	0.408186	9.79944		II/III	21	0.34932	60.1167		II/III	21	0.346026	60.6891		II/III	3	0.262273	11.4384		II/III	7	0.283096	24.7266		II/III	7	0.260137	26.9089
		IV	10	0.232174	43.0711		IV	5	0.269502	18.5527		IV	24	0.303712	79.0222		IV	14	0.327369	42.7652		IV	9	0.185281	48.5748		IV	3	0.169289	17.7212		IV	2	0.197376	10.133
		V	11	0.350255	31.4057		V	4	0.364663	10.969		V	6	0.374511	16.0209		V	14	0.360135	38.8743		V	6	0.294178	20.3958		V	3	0.295463	10.1536		V	1	0.248518	4.02386
		VI	6	0.401139	14.9574		VI	4	0.414256	9.65586		VI	1	0.46129	2.16783		VI	3	0.405248	7.40288		VI	3	0.327283	9.16638		VI	2	0.271522	7.36589		VI	0	0.237827	0
		total	40	1.54835	25.834		total	18	1.62747	11.0601		total	53	1.66475	31.8366		total	53	1.60784	32.9635		total	21	1.25815	16.6911		total	15	1.17873	12.7256		total	10	1.07322	9.31774

## Sheet: Figure 3-Fig Suppl 4B′ 
	Figure 3 - Figure supplement 4B' source data. Increased survival of non-recombined (non-Nkx2.1-derived) PV cINs in visual cortex of WT and Pcdhg-deficient mice.
	Nkx2.1Cre;Ai14;Pcdhg		Nkx2.1Cre;Ai14;Pcdhg
	Pcdhg WT		Pcdhg mutant
	mean # of PV+tomato-/mm2		mean # of PV+tomato-/mm2
	21.4247		36.1038
	12.8382		32.9434
	10.9205		22.6514
	15.3214		24.4978
	Figure 3. - Figure supplement 4B' source data. Quantification of PV positive non-recombined (non-Nkx2.1-derived) GABAergic cINs in visual cortex of WT and Pcdhg-deficient mice.
