# Supplementary material for: Clustered gamma-protocadherins regulate cortical interneuron programmed cell death
Source: eLife. 2020 Jul 7;9:e55374. doi: 10.7554/eLife.55374 (PMC7373431; doi:10.7554/eLife.55374)
Supplement: Figure 3—source data 1. [file elife-55374-fig3-data1.xlsx]

## Sheet: Figure 3C and 5C raw data
Figure 3C' and Figure 5C. Stereological estimation (shown as densities) of Nkx2.1-derived neurons in visual (V1) and barrel (S1BF) cortex of P30 mice. cIN densities were measured in Nkx2.1Cre;ai14 mice that carry WT, HET or mutant Pcdhg, and also in Nkx2.1Cre;ai14;Bax-/- that carry HET or mutant Pcdhg.
		Visual cortex (P30)						Barrel cortex (P30)
	Nkx2.1Cre;Ai14;	1st litter					Nkx2.1Cre;Ai14;	1st litter
		Mouse ID	Estimated population	Measured Volume (µm3)	Cell Density (mm3)			Mouse ID	Estimated population	Measured Volume (µm3)	Cell Density (mm3)
	Pcdhg WT	5	18332.2	1207300000	15184.5		Pcdhg WT	5	95414.7	6590660000	14477.3
		7	31817.2	1712090000	18583.8			7	88786.3	6868190000	12927.2
								2
	Pcdhgfcon3/+	1	24543.2	1697300000	14460.1		Pcdhgfcon3/+	1	82293.5	8599510000	9569.56
		3	42734.5	2154210000	19837.7			3	77764.9	7888840000	9857.58
		8	29683.4	1501920000	19763.6			8	86914.5	7062760000	12306
	Pcdhgfcon3/fcon3	6	13888.6	1559700000	8904.65		Pcdhgfcon3/fcon3	6	54737.7	8995680000	6084.88
		4	24440.6	2651440000	9217.85			4	55554.4	7579490000	7329.57
		2nd litter						2nd litter
	Pcdhg WT	3	45450.9	2779300000	16353.3		Pcdhg WT	3	93833.8	7544740000	12437
		8	45808.3	2507700000	18267.1			8	95166.5	7907650000	12034.7
	Pcdhgfcon3/+	5	45908.4	2871460000	15987.8		Pcdhgfcon3/+	5	115684	8159340000	14178.1
		10	48052.8	2444190000	19660			10	130440	8473760000	15393.4
	Pcdhgfcon3/fcon3	9	20263.4	2537840000	7984.51		Pcdhgfcon3/fcon3	9	67508.4	8237470000	8195.28
		13	25536.8	2462740000	10369.2			13	61492.1	6533460000	9411.87
		additional animals
	Pcdhg WT	G	23754.9	1557320000	15253.7
	Pcdhgfcon3/+	V	23248.1	1639540000	14179.6
	Pcdhgfcon3/fcon3	NA	10351.3	1694690000	6108.08
			Bax null mice						Bax null mice
	Pcdhgfcon3/+;Bax-/-	N1	31388.7	1288550000	24359.7		Pcdhgfcon3/+;Bax-/-	N1	59987.8	2980790000	20124.8
		N3	45000.5	1377360000	32671.5			N3	64786	2247410000	28827
		N4	48665.8	1545420000	31490.4			N4	49228.9	1809320000	27208.5
		N13	38316.7	1847510000	20739.6			N13	38579.4	2189870000	17617.2
	Pcdhgfcon3/fcon3;Bax-/-	6	36089.9	1152600000	31311.8		Pcdhgfcon3/fcon3;Bax-/-	6	46156.8	1660570000	27795.8
		32	46747.6	1986890000	23528			32	33522.6	1666900000	20110.7
		4	33633	1129120000	29786.9			4	52916.4	2621850000	20182.8
		N6	21040	914261000	23013.1			N6	42740.3	2440870000	17510.3

## Sheet: Figure 3C′
	Figure 3C'. Loss of Pcdhg in Nkx2.1-derived cINs results in reduced densities of Nkx2.1-derived cINs in P30 mice.
	Figure 3C'
	V1 P30				S1BF P30
	Cells/mm2				Cells/mm2
	Nkx2.1Cre;Ai14;Pcdhg				Nkx2.1Cre;Ai14;Pcdhg
	WT	HET	mutant		WT	HET	mutant
	15184.5	14460.1	8904.65		14477.3	9569.56	6084.88
	18583.8	19837.7	9217.85		12927.2	9857.58	7329.57
	16353.3	19763.6	7984.51		12437	12306	8195.28
	18267.1	15987.8	10369.2		12034.7	14178.1	9411.87
	15253.7	19660	6108.08			15393.4
		14179.6
	Figure 3C'. Stereological estimation (shown as densities) of Nkx2.1-derived neurons in visual (V1) and barrel (S1BF) cortex of P30 mice. cIN densities were measured in Nkx2.1Cre;Ai14 mice that carry WT, HET or mutant Pcdhg, and also in Nkx2.1Cre;Ai14;Bax-/- that carry HET or mutant Pcdhg. n=4-5 mice per genotype.

## Sheet: Figure 3D
	Figure 3D. Loss of Pcdhg in Nkx2.1-derived cINs does not affect cortical thickness and body weight.
	weight at P30			V1 cortex thickness P30
	Nkx2.1Cre;Ai14;Pcdhg			Nkx2.1Cre;Ai14;Pcdhg
	WT	MUT		WT	MUT
	21	22		977.667	977.5
	21.4	15.5		1015.67	998
	20.1	16.5		966.333	986.667
	15.6	15.6		1024.17	953.667
	18.8	14.2			922.88
	17.2	14.4
	20	16.6
	17	19
	21	19
	16	15
	Figure 3D. Measurements of cortex (right table) thickness and body weight (left table) in Nkx2.1Cre;Ai14 mice carrying the WT, HET or mutant Pcdhg.

## Sheet: Figure 3E raw data
	Figure 3E. Detailed quantifications of cIN subtypes density in visual cortex of P30 Nkx2.1Cre; Ai14 mice carrying WT, heterozygote or mutant Pcdhg.
	Section thickness : 0.05mm
	V1 cell quantifications of PV+, SST+, RLN+ and VIP+ cINs
	PV															SST															RLN															VIP
	WT #1	Area (mm2)	Nb Cells PV+	PV+ / mm2		Het #1	Area (mm2)	Nb Cells PV+	PV+ / mm2		Homo #1	Area (mm2)	Nb Cells PV+	PV+ / mm2		WT #1	Area (mm2)	Nb Cells SST+	SST+/ mm2		Het #1	Area (mm2)	Nb Cells SST+	SST+/ mm2		Homo #1	Area (mm2)	Nb Cells SST+	SST+/ mm2		WT #1	Area (mm2)	Nb Cells RLN+	RLN+ / mm2		Het #1	Area (mm2)	Nb Cells RLN+	RLN+ / mm2		Homo #1	Area (mm2)	Nb Cells RLN+	RLN+ / mm2		WT #1	Area (mm2)	Nb Cells VIP+	VIP+ / mm2
	a	1.57941	383	4849.91		a	1.59516	425	5328.61		a	1.58718	240	3024.23		a	1.48569	243	3271.2		a	1.49675	233	3113.42		a	1.50461	162	2153.38		a	1.48569	298	4011.6		a	1.49675	244	3260.4		a	1.50461	244	3243.4		a	1.57941	146	1848.79
	b	1.4897	407	5464.18		b	1.51458	408	5387.62		b	1.4919	290	3887.66		b	1.53794	265	3446.16		b	1.59553	251	3146.29		b	1.52102	179	2353.68		b	1.53794	302	3927.3		b	1.59553	264	3309.2		b	1.52102	218	2866.5		b	1.58354	158	1995.52
	a	1.44433	396	5483.52		a	1.49901	476	6350.85		a	1.40735	285	4050.16		c	1.42756	256	3586.53		c	1.56349	248	3172.39		c	1.52744	155	2029.55		c	1.42756	288	4034.8		c	1.56349	249	3185.2		c	1.52744	207	2710.4		a	1.44433	134	1855.54
	b	1.55893	400	5131.73		b					b	1.49382	229	3065.97		d	1.49909	246	3281.99		d	1.61429	214	2651.32		d	1.47502	140	1898.28		d	1.49909	251	3348.7		d	1.61429	230	2849.6		d	1.47502	153	2074.6		b	1.55893	167	2142.5
	a	1.46639	451	6151.18		a	1.56727	388	4951.28		a	1.59531	268	3359.84		e	1.47216	245	3328.45		e	1.66161	267	3213.76		e	1.61654	161	1991.9		e	1.47216	237	3219.8		e	1.66161	314	3779.5		e	1.61654	261	3229.1		a	1.46639	170	2318.62
	b	1.5163	471	6212.5		b					b	1.57251	284	3612.06		f	1.49585	261	3489.65		f	1.78644	289	3235.49		f	1.56679	162	2067.92		f	1.49585	254	3396.1		f	1.78644	273	3056.4		f	1.56679	273	3484.8		b	1.5163	180	2374.2
	a	1.54446	447	5788.43		a	1.56587	480	6130.78		a	1.66387	286	3437.78		g	1.53368	230	2999.32		g	1.65105	266	3222.2		g	1.57238	140	1780.74		g	1.53368	234	3051.5		g	1.65105	250	3028.4		g	1.57238	211	2683.8		a	1.54446	146	1890.63
	b	1.54319	475	6156.07		Mean	1.54838	435.4	5629.83		b	1.68222	294	3495.38		h	1.492	263	3525.48		h	1.70071	256	3010.5		Mean	1.54054	157	2039.35		h	1.492	294	3941		h	1.70071	258	3034		Mean	1.54054	223.857	2898.94		b	1.54319	177	2293.95
	Mean	1.51784	428.75	5654.69							Mean	1.56177	272	3491.63		i	1.54903	216	2788.83		i	1.78991	250	2793.43							i	1.54903	275	3550.6		i	1.78991	240	2681.7							Mean	1.52957	159.75	2089.97
						Het #2										Mean	1.49922	247.222	3301.96		Mean	1.65109	252.667	3062.09		Homo #2					Mean	1.49922	270.333	3609.04		Mean	1.65109	258	3131.6		Homo #2
	WT #2					a	1.44302	385	5336.05		Homo #2															a	1.52344	124	1627.89												a	1.52344	168	2205.5		WT #2
	a	1.56086	472	6047.97		b	1.39766	484	6925.88		a	1.42554	263	3689.84		WT #8					Het #2					b	1.40896	133	1887.92		WT #2					Het #2					b	1.40896	172	2441.5		a	1.56086	120	1537.62
	b	1.53946	410	5326.54		a	1.41494	561	7929.65		b	1.44516	274	3791.96		a	1.58809	223	2808.4		a	1.55266	215	2769.43		c	1.52176	154	2023.97		a	1.58809	281	3538.8		a	1.55266	233	3001.3		c	1.52176	209	2746.8		b	1.53946	121	1571.98
	a	1.71771	510	5938.14		b	1.46612	492	6711.61		a	1.41857	319	4497.48		b	1.54639	269	3479.06		b	1.4964	252	3368.08		d	1.44016	147	2041.44		b	1.54639	317	4099.9		b	1.4964	252	3368.1		d	1.44016	179	2485.8		a	1.71771	123	1432.14
	b	1.61762	509	6293.19		a	1.42008	372	5239.15		b	1.42166	298	4192.27		c	1.57442	241	3061.44		c	1.50406	195	2592.98		e	1.44925	118	1628.43		c	1.57442	270	3429.8		c	1.50406	201	2672.8		e	1.44925	204	2815.3		b	1.61762	123	1520.75
	a	1.5541	541	6962.24		b	1.43994	477	6625.26		a	1.50865	309	4096.38		d	1.55516	228	2932.17		d	1.59228	272	3416.48		f	1.5947	132	1655.48		d	1.55516	250	3215.1		d	1.59228	287	3604.9		f	1.5947	200	2508.3		a	1.5541	131	1685.87
	b	1.61473	569	7047.61		a	1.38185	465	6730.1							e	1.61081	260	3228.2		e	1.52387	230	3018.62		g	1.5165	143	1885.92		e	1.61081	291	3613.1		e	1.52387	263	3451.7		g	1.5165	201	2650.8		b	1.61473	136	1684.49
	a	1.7405	505	5802.92		b	1.59359	385	4831.85		a	1.61927	276	3408.94		f	1.578	238	3016.47		f	1.54374	250	3238.9		h	1.57099	129	1642.28		f	1.578	270	3422		f	1.54374	247	3200		h	1.57099	210	2673.5		a	1.7405	132	1516.8
	b	1.67007	546	6538.63		Mean	1.44465	452.625	6291.19		b	1.38272	299	4324.82		g	1.70137	270	3173.92		g	1.5049	245	3256.04		i	1.66291	131	1575.56		g	1.70137	292	3432.5		g	1.5049	230	3056.7		i	1.66291	235	2826.4		b	1.67007	125	1496.94
	Mean	1.62688	507.75	6244.65							Mean	1.46022	291.143	4000.24		h	1.70405	253	2969.4		h	1.54438	255	3302.29		Mean	1.52096	134.556	1774.32		h	1.70405	311	3650.1		h	1.54438	276	3574.2		Mean	1.52096	197.556	2594.88		Mean	1.62688	126.375	1555.82
						Het #3										i	1.77503	349	3932.33		Mean	1.53279	239.25	3120.35							i	1.77503	366	4123.9		Mean	1.53279	248.625	3241.21
	WT #3					a	1.55656	465	5974.7		Homo #9					j	1.72496	342	3965.31							#9					j	1.72496	317	3675.4							M9					M3
	a	1.43352	321	4478.48		b	1.5359	399	5195.65		a	1.47575	240	3252.58		Mean	1.63583	267.3	3256.67		Het #3					a	1.37651	124	1801.65		Mean	1.63583	296.5	3620.06		Het #3					a	1.5114	155	2051.1		a	1.52475	105	1377.27
	b	1.45463	303	4165.99		a	1.55891	454	5824.58		b	1.4466	222	3069.26							a	1.5178	215	2833.05		b	1.57771	117	1483.17							a	1.5178	198	2609		b	1.41669	162	2287		b	1.50495	122	1621.32
	c	1.41107	361	5116.68		b	1.50202	369	4913.39		c	1.48345	290	3909.81		#3					b	1.58294	204	2577.49		c	1.32371	114	1722.43		M3					b	1.58294	213	2691.2		c	1.43609	157	2186.5		a	1.57221	127	1615.56
	d	1.53515	380	4950.65		a					d	1.64433	262	3186.71		a	1.5226	274	3599.1		c	1.6364	205	2505.5		d	1.47328	127	1724.04		a	1.48408	308	4150.7		c	1.6364	214	2615.5		d	1.57368	169	2147.8		b	1.49305	134	1794.98
	e	1.56539	380	4855.02		b					e	1.48989	201	2698.18		b	1.55339	195	2510.64		d	1.62578	165	2029.79		e	1.48945	136	1826.17		b	1.46037	239	3273.1		d	1.62578	195	2398.8		e	1.44372	168	2327.3		a	1.44536	128	1771.19
	f	1.40227	331	4720.93		a	1.63792	426	5201.71		f	1.45589	227	3118.38		c	1.60337	214	2669.37		e	1.64852	289	3506.17		f	1.53572	133	1732.08		c	1.55953	290	3719.1		e	1.64852	303	3676		f	1.46257	152	2078.5		b	1.48806	135	1814.44
	Mean	1.46701	346	4714.62		b	1.61893	375	4632.68		Mean	1.49932	240.333	3205.82		d	1.61902	231	2853.58		f	1.6355	253	3093.85		Mean	1.46273	125.167	1714.92		d	1.57613	266	3375.4		f	1.6355	250	3057.2		Mean	1.47402	160.5	2179.7		Mean	1.50473	125.167	1665.79
						Mean	1.56837	414.667	5290.45							e	1.48417	267	3597.98		g	1.59262	202	2536.69							e	1.48551	243	3271.6		g	1.59262	215	2699.9
	WT #8										Homo #13					f	1.49645	246	3287.78		h	1.72989	317	3664.97		#13					f	1.57801	220	2788.3		h	1.72989	298	3445.3		M13					M8
	a	1.45462	244	3354.82		Het #5					a	1.31052	236	3601.64		Mean	1.5465	237.833	3086.41		i	1.7341	250	2883.33		a	1.56744	114	1454.6		g	1.48328	232	3128.2		i	1.7341	230	2652.7		a	1.51028	141	1867.2		a	1.45331	123	1692.69
	b	1.49814	268	3577.76		a	1.45607	274	3763.55		b	1.32584	214	3228.14							Mean	1.63373	233.333	2847.87		b	1.47749	116	1570.23		Mean	1.51813	256.857	3386.63		Mean	1.63373	235.111	2871.73		b	1.37419	166	2416		b	1.44019	136	1888.64
	c	1.48738	328	4410.45		b	1.55227	340	4380.67		c	1.33841	239	3571.39		#8										c	1.34074	122	1819.89												c	1.37315	147	2141.1		a	1.45219	143	1969.44
	d	1.6513	319	3863.62		d	1.54027	336	4362.88		d	1.48272	260	3507.06		a	1.55736	203	2606.98		#5					d	1.34295	126	1876.46		M8					M5					d	1.50589	154	2045.3		b	1.50243	142	1890.26
	e	1.53258	297	3875.82		e	1.49832	281	3750.87		e	1.3566	233	3435.07		b	1.65911	244	2941.33		a	1.41945	225	3170.24		e	1.47652	115	1557.71		a	1.48328	232	3128.2		a	1.44792	259	3577.5		e	1.43122	165	2305.7		a	1.57984	130	1645.74
	f	1.41722	274	3866.72		f	1.38739	321	4627.39		f	1.32026	239	3620.5		c	1.44878	212	2926.59		b	1.64	222	2707.32		f	1.53849	122	1585.97		b	1.42317	243	3414.9		b	1.50442	194	2579.1		f	1.45426	135	1856.6		b	1.45152	137	1887.67
	g	1.38644	246	3548.66		g	1.3927	291	4178.94		Mean	1.35572	236.833	3493.97		d	1.43459	228	3178.62		d	1.46057	217	2971.45		Mean	1.45727	119.167	1644.15		c	1.43632	218	3035.5		c	1.56132	202	2587.6		Mean	1.4415	151.333	2105.32		Mean	1.47991	135.167	1829.07
	Mean	1.48967	282.286	3785.41		Mean	1.47117	307.167	4177.38							e	1.61942	259	3198.68		e	1.52858	200	2616.81							d	1.56165	221	2830.3		d	1.55524	218	2803.4
																f	1.60587	232	2889.4		f	1.44965	207	2855.86							e	1.53611	240	3124.8		e	1.44023	224	3110.6
						Het #10										Mean	1.55419	229.667	2956.93		Mean	1.49965	214.2	2864.34							Mean	1.4881	230.8	3106.74		f	1.43305	228	3182
						a	1.39078	316	4544.2																											Mean	1.49036	220.833	2973.37
						b	1.41999	319	4492.99												#10
						c	1.47295	347	4711.63												a	1.56784	221	2819.16												M10
						d	1.51093	371	4910.89												b	1.47208	212	2880.27												a	1.36032	207	3043.4
						e	1.37674	343	4982.8												c	1.6278	214	2629.31												b	1.4778	201	2720.3
						f	1.41766	331	4669.66												d	1.51697	215	2834.6												c	1.42838	235	3290.4
						Mean	1.43151	337.833	4718.69												e	1.47005	219	2979.5												d	1.43269	194	2708.2
																					f	1.49543	205	2741.69												e	1.42127	227	3194.3
																					Mean	1.52503	214.333	2814.09												f	1.48565	198	2665.5
																																				Mean	1.43435	210.333	2937.02

## Sheet: Figure 3E 
	Figure 3E. Pcdhg loss of function in Nkx2.1-derived cINs results in reduced densities of MGE-derived cIN subtypes.
	Figure 3E	Mean # of PV+ cells/mm2				Mean # of SST+ cells/mm2				Mean # of RLN+ cells/mm2				Mean # of VIP+ cells/mm2
		Nkx2.1Cre;Ai14;Pcdhg				Nkx2.1Cre;Ai14;Pcdhg				Nkx2.1Cre;Ai14;Pcdhg				Nkx2.1Cre;Ai14;Pcdhg
	# of mice	WT	HET	mutant		WT	HET	mutant		WT	HET	mutant		WT	HET	mutant
	1	5654.69	5629.83	3491.63		3301.96	3062.09	2039.35		3609.04	3131.6	2898.94		2089.97	1900.82	1666.1
	1	6244.65	6291.19	4000.24		3256.67	3120.35	1774.32		3620.06	3241.21	2594.88		1555.82	2007.47	2046.37
	3	4714.62	5290.45	3205.82		3086.41	2847.87	1714.92		3386.63	2871.73	2179.7		1665.79	1716.83	1863.54
	4	3785.41	4177.38	3493.97		2956.93	2864.34	1644.15		3106.74	2973.37	2105.32		1829.07	1741.57	2021.78
	5		4718.69				2814.09				2937.02				1932.12
	Figure 3E. Quantifications of cIN subtypes PV, SST, RLN and VIP in visual cortex of P30 Nkx2.1Cre;Ai14 mice carrying WT, heterozygote or mutant Pcdhg. n=4-5 mice per genotype.
