# Supplementary material for: Clustered gamma-protocadherins regulate cortical interneuron programmed cell death
Source: eLife. 2020 Jul 7;9:e55374. doi: 10.7554/eLife.55374 (PMC7373431; doi:10.7554/eLife.55374)
Supplement: Figure 4—source data 1. [file elife-55374-fig4-data1.xlsx]

## Sheet: Figure 4B raw data
																						Figure 4B source data. Detailed quantifications of the density of PH3 positive cells in MGE at E13.5 and E15.5 of Nkx2.1Cre;Ai14 embryos that carry WT or mutant Pcdhg.
	Figure 4B. Detailed quantifications of the density of PH3 positive cells in the MGE of Nkx2-1Cre;Ai14 embryos at E13-5 and E15-5 that carry WT or mutant Pcdhg.
	PH3 positive cells in MGE at E13.5																				PH3 positive cells in MGE at E15.5
	VZ										SVZ										VZ										SVZ
	Nkx2.1Cre;Ai14;Pcdh (WT)					Nkx2.1Cre;Ai14;Pcdhgfcon3/fcon3 (mutant)					Nkx2.1Cre;Ai14;Pcdh (WT)					Nkx2.1Cre;Ai14;Pcdhgfcon3/fcon3 (mutant)					Nkx2.1Cre;Ai14;Pcdh (WT)					Nkx2.1Cre;Ai14;Pcdhgfcon3/fcon3 (mutant)					Nkx2.1Cre;Ai14;Pcdh (WT)					Nkx2.1Cre;Ai14;Pcdhgfcon3/fcon3 (mutant)
	ID/genotype	Area (mm2)	Nb Cells PH3+	PH3+ cells/mm2		ID/genotype	Area (mm2)	Nb Cells PH3+	PH3+ cells/mm2		ID/genotype	Area (mm2)	Nb Cells PH3+	PH3+ cells/mm2		ID/genotype	Area (mm2)	Nb Cells PH3+	PH3+ cells/mm2		ID/genotype	Area (mm2)	Nb Cells PH3+	PH3+ cells/mm2		ID/genotype	Area (mm2)	Nb Cells PH3+	PH3+ cells/mm2		ID/genotype	Area (mm2)	Nb Cells PH3+	PH3+ cells/mm2		ID/genotype	Area (mm2)	Nb Cells PH3+	PH3+ cells/mm2
	#1					#2					#1					#2					WT #1					#3					#1					#3
	a	0.0752929	181	2403.95		a	0.154784	198	1279.2
	b	0.11284	173	1533.14		b	0.159075	149	936.666		a	0.019363	35	1807.57		a	0.0592419	72	1215.36		a	0.0846623	145	1712.69		a	0.0326222	44	1348.78		a	0.195728	175	894.096		a	0.0906171	82	904.906
	c	0.132	152	1151.51		c	0.171516	205	1195.22		b	0.043459	76	1748.78		b	0.0794469	105	1321.64		b	0.0490386	75	1529.41		b	0.0310962	33	1061.22		b	0.104919	132	1258.12		b	0.0837687	56	668.507
	d	0.101299	137	1352.44		d	0.333486	178	533.756		c	0.0215694	8	370.896		c	0.0582115	127	2181.7		c	0.0946954	116	1224.98		c	0.043251	48	1109.8		c	0.210445	214	1016.89		c	0.13528	119	879.66
	e	0.135769	199	1465.73		e	0.0985568	177	1795.92		d	0.0517823	86	1660.8		d	0.086875	155	1784.17		d	0.106837	140	1310.41		d	0.0385174	46	1194.26		d	0.252569	233	922.522		d	0.119017	83	697.382
	f	0.124029	171	1378.71		f	0.136904	169	1234.44		e	0.045576	72	1579.78		e	0.154702	155	1001.93		e	0.038918	116	2980.63		e	0.0247839	39	1573.6		e	0.076181	175	2297.16		e	0.0659225	63	955.667
	g	0.16081	211	1312.1		g	0.127803	172	1345.82		f	0.0649487	95	1462.69		f	0.115835	169	1458.97		f	0.0789136	113	1431.95		f	0.0420665	67	1592.72		f	0.168963	160	946.956		f	0.0877073	92	1048.94
	h	0.126131	173	1371.59		h	0.13961	151	1081.58		g	0.0603377	97	1607.62		g	0.167903	229	1363.88		g	0.0876065	107	1221.37		g	0.0269675	40	1483.27		g	0.179115	172	960.278		g	0.0683718	68	994.562
	i	0.138837	187	1346.91		i	0.119652	154	1287.06		h	0.0860381	123	1429.6		h	0.134094	250	1864.37		h	0.102167	128	1252.85		h	0.0304776	41	1345.25		h	0.182371	158	866.367		h	0.0891553	81	908.527
	j	0.12155	162	1332.78		j	0.129423	152	1174.45		i	0.0991954	153	1542.41		i	0.151582	205	1352.4		i	0.0760932	97	1274.75		i	0.0338388	46	1359.39		i	0.212892	199	934.747		i	0.131584	97	737.173
	k	0.139706	174	1245.48		k	0.133279	159	1192.99		j	0.121871	173	1419.53		j	0.147576	194	1314.58		j	0.0485552	51	1050.35		j	0.0346751	38	1095.89		j	0.20109	205	1019.45		j	0.113767	92	808.667
	l	0.107983	133	1231.67		l	0.0990304	125	1262.24		k	0.119383	194	1625.02		k	0.191334	202	1055.75		k	0.0905644	101	1115.23		MEAN	0.0338296	44.2	1316.42		k	0.185116	140	756.285		MEAN	0.098519	83.3	860.4
	MEAN	0.12302	171.083	1427.17		m	0.109063	108	990.253		l	0.143189	166	1159.31		l	0.197084	219	1111.2		l	0.116464	126	1081.88							l	0.17552	146	831.814		#6	Area (mm2)	Nb Cells pH3+	pH3 / mm2
						n	0.10827	141	1302.3		MEAN	0.0730594	106.5	1451.17		m	0.19766	193	976.425		MEAN	0.0812096	109.583	1432.21		#6	Area (mm2)	Nb Cells pH3+	pH3 / mm2		MEAN	0.178742	175.75	1058.72
	#8	Area (mm2)	Nb Cells pH3+	pH3 / mm2		o	0.104558	124	1185.95							n	0.237841	204	857.715		#5	Area (mm2)	Nb Cells pH3+	pH3 / mm2							#5	Area (mm2)	Nb Cells pH3+	pH3 / mm2		a	0.0422475	33	781.111
						p	0.110327	124	1123.93		#8	Area (mm2)	Nb Cells pH3+	pH3 / mm2		o	0.298381	190	636.769							a	0.0145721	16	1097.99							b	0.0650404	52	799.503
	a	0.118165	239	2022.6												p	0.25688	181	704.609		a	0.0875492	99	1130.79		b	0.0274509	41	1493.58		a	0.187086	181	967.47		c	0.0460624	24	521.033
	b	0.120591	154	1277.05		MEAN	0.139709	155.375	1182.61		a	0.0225454	23	1020.16		MEAN	0.158415	178.125	1262.59		b	0.0596996	79	1323.29		c	0.0161392	16	991.373		b	0.141899	145	1021.85		d	0.0486285	40	822.563
	c	0.104546	106	1013.91							b	0.0676335	130	1922.13		#5	Area (mm2)	Nb Cells pH3+	pH3 / mm2		c	0.11313	113	998.847		d	0.0222476	34	1528.26		c	0.187349	206	1099.55		e	0.0314559	25	794.762
	d	0.0982107	117	1191.32		#5	Area (mm2)	Nb Cells pH3+	pH3 / mm2		c	0.0521409	98	1879.52							d	0.0774794	94	1213.23		e	0.0213655	23	1076.5		d	0.124424	106	851.927		f	0.0573855	44	766.744
	e	0.101501	119	1172.4							d	0.110885	182	1641.34		c	0.058747	61	1038.35		e	0.0811888	108	1330.23		f	0.0266673	26	974.976		e	0.217582	191	877.831		g	0.0397615	31	779.648
	f	0.102281	111	1085.25		a	0.110826	190	1714.41		e	0.0807512	136	1684.19		d	0.0470258	63	1339.69		f	0.100245	153	1526.26		g	0.0252147	25	991.486		f	0.16685	159	952.952		h	0.0286538	19	663.089
	g	0.0709305	100	1409.83		b	0.127697	260	2036.06		f	0.136976	178	1299.5		e	0.0699378	121	1730.11		g	0.0951354	114	1198.29		h	0.00785196	17	2165.06		g	0.183342	151	823.597		MEAN	0.0449044	33.5	741.057
	h	0.080789	91	1126.39		c	0.117599	146	1241.5		g	0.120191	198	1647.37		f	0.0595661	122	2048.14		h	0.0850564	128	1504.88		MEAN	0.0201887	24.75	1289.9		h	0.19264	201	1043.4		#7	Area (mm2)	Nb Cells pH3+	pH3 / mm2
	i	0.0938511	177	1885.97		d	0.138752	214	1542.32		h	0.209378	214	1022.07		g	0.0979438	154	1572.33		i	0.057051	83	1454.84		#7	Area (mm2)	Nb Cells pH3+	pH3 / mm2		i	0.220244	238	1080.62
	MEAN	0.098985	134.889	1353.86		e	0.138123	144	1042.55		i	0.0390977	21	537.116		MEAN	0.0666441	104.2	1545.72		j	0.0676226	80	1183.04							j	0.20079	213	1060.81		a	0.0745764	58	777.726
						f	0.16065	164	1020.85		MEAN	0.0932888	131.111	1405.93		#6	Area (mm2)	Nb Cells pH3+	pH3 / mm2		MEAN	0.0824157	105.1	1286.37		a	0.0306952	40	1303.13		MEAN	0.182221	179.1	978.001		b	0.112329	86	765.611
						g	0.0842252	95	1127.93												#9	Area (mm2)	Nb Cells pH3+	pH3 / mm2		b	0.0565263	66	1167.6		#9	Area (mm2)	Nb Cells pH3+	pH3 / mm2		c	0.113783	81	711.878
						MEAN	0.12541	173.286	1389.37							a	0.11133	190	1706.64							c	0.0345697	35	1012.45							d	0.149671	157	1048.97
	#9	Area (mm2)	Nb Cells pH3+	pH3 / mm2												b	0.164555	246	1494.94		a	0.0783795	86	1097.23		d	0.101416	81	798.694		a	0.101565	122	1201.21		e	0.166813	168	1007.11
											#9	Area (mm2)	Nb Cells pH3+	pH3 / mm2		c	0.121167	193	1592.84		b	0.0984791	100	1015.44		e	0.0862157	89	1032.29		b	0.139939	139	993.29		f	0.210759	169	801.865
	a	0.11783	180	1527.63		Homo #6	Area (mm2)	Nb Cells pH3+	pH3 / mm2							d	0.184766	225	1217.76		c	0.107966	133	1231.87		f	0.0751767	77	1024.25		c	0.164143	162	986.947		g	0.178627	136	761.364
	b	0.124019	179	1443.33							a	0.057138	31	542.546		e	0.159038	210	1320.44		d	0.100201	88	878.234		g	0.0595278	69	1159.12		d	0.181065	140	773.201		h	0.177976	180	1011.37
	c	0.123405	157	1272.24		a	0.173318	188	1084.71		b	0.0503062	35	695.739		f	0.21536	200	928.678		e	0.0811201	79	973.865		h	0.0883213	83	939.75		e	0.144968	117	807.075		i	0.183079	192	1048.73
	d	0.1538	155	1007.8		b	0.143361	160	1116.06		c	0.0391876	40	1020.73		g	0.205651	172	836.368		f	0.0926692	87	938.823		i	0.049545	70	1412.86		f	0.206349	160	775.385		j	0.168009	194	1154.7
	e	0.127334	126	989.526		c	0.0971677	130	1337.89		d	0.0683798	93	1360.05		h	0.190795	197	1032.52		g	0.105223	93	883.836		j	0.0774702	112	1445.72		g	0.202492	124	612.37		k	0.167847	207	1233.27
	f	0.103843	265	2551.94		d	0.111456	144	1291.99		e	0.0773144	115	1487.43		MEAN	0.169083	204.125	1266.27		h	0.106568	113	1060.35		k	0.0492407	77	1563.75		h	0.215738	152	704.559		l	0.152326	170	1116.03
	g	0.105137	119	1131.86		e	0.1074	115	1070.77		f	0.117191	152	1297.03		#7	Area (mm2)	Nb Cells pH3+	pH3 / mm2		i	0.0978648	94	960.509		l	0.0830567	98	1179.92		i	0.183993	142	771.768		MEAN	0.15465	149.833	953.218
	h	0.0891891	11	123.333		f	0.0975056	100	1025.58		g	0.120112	149	1240.51							j	0.0931922	86	922.824		MEAN	0.0659801	74.75	1169.96		j	0.194147	150	772.611		#8	Area (mm2)	Nb Cells pH3+	pH3 / mm2
	MEAN	0.11807	149	1255.96		g	0.0958777	142	1481.05		h	0.131965	163	1235.17		a	0.0490724	67	1365.33		k	0.104517	91	870.668		#8	Area (mm2)	Nb Cells pH3+	pH3 / mm2		k	0.232942	152	652.524
						h	0.100354	127	1265.52		MEAN	0.0826993	97.25	1109.9		b	0.0259393	20	771.031		MEAN	0.0969255	95.4545	984.877							MEAN	0.178849	141.818	822.812		a	0.108754	180	1655.11
																c	0.067744	121	1786.14							a	0.0542285	66	1217.07							b	0.177916	160	899.3
							0.115805	138.25	1209.2							d	0.04724	86	1820.49							b	0.0727751	78	1071.79							c	0.211515	184	869.914
																e	0.129698	165	1272.19							c	0.0691942	81	1170.62							d	0.181081	195	1076.86
																f	0.0908491	167	1838.21							d	0.0745382	65	872.036							e	0.16805	168	999.702
						#7	Area (mm2)	Nb Cells pH3+	pH3 / mm2							g	0.150341	179	1190.62							e	0.108669	107	984.638							f	0.253388	210	828.767
																h	0.162226	199	1226.69							f	0.0935142	107	1144.21							g	0.25216	233	924.018
						a	0.136525	189	1384.36							MEAN	0.0903887	125.5	1408.84							g	0.0386531	35	905.491
						b	0.125591	237	1887.08																	MEAN	0.0730818	77	1052.27								0.193266	190	1036.24
						c	0.106994	110	1028.09																											MEAN	0.193266	190	1036.24
						d	0.160913	189	1174.55
						e	0.105828	127	1200.06
						f	0.130254	168	1289.78
						g	0.117385	147	1252.29
						h	0.104963	123	1171.84
						MEAN	0.123557	161.25	1298.51

## Sheet: Figure 4B
	Figure 4B source data. Proliferation of cIN precursors is not affected in MGE of Pcdhg mutant embryos.
	E13.5						E15.5
	VZ			SVZ			VZ			SVZ
	Mean # of PH3+ / mm2			Mean # of PH3+ / mm2			Mean # of PH3+ / mm2			Mean # of PH3+ / mm2
	Nkx2.1Cre;Ai14;Pcdhg			Nkx2.1Cre;Ai14;Pcdhg			Nkx2.1Cre;Ai14;Pcdhg			Nkx2.1Cre;Ai14;Pcdhg
	WT	mutant		WT	mutant		WT	mutant		WT	mutant
	1427.17	1182.61		1451.17	1262.59		1432.21	1316.42		1058.72	860.4
	1353.86	1389.37		1405.93	1545.72		1286.37	1289.9		978.001	741.057
	1255.96	1298.51		1109.9	1266.27		984.877	1169.96		822.812	953.218
		1209.2			1408.84			1052.27			1036.24
	Figure 4B source data. Quantifications of the density of PH3 positive cells in VZ and SVZ of MGE at E13.5 (left table) and E15.5 (right table) of Nkx2.1Cre; Ai14 embryos that carry WT or mutant Pcdhg.

## Sheet: Figure 4D raw data
Figure 4D. Detailed quantifications of the density of tdTomato+ the dorsal cortex (Nkx2.1-derived) in Nkx2-1Cre;Ai14 embryos at E15.5 that carry WT or mutant Pcdhg.
	IZ-SVZ					CP
Nkx2.1Cre; Ai14; Pcdhg	ID/genotype	Area (mm2)	# of tdTomato+ cells	tdTomato+ cells/mm2		ID/genotype	Area (mm2)	# of tdTomato+ cells	tdTomato+ cells/mm2
Pcdhg WT	M1					M1
	1a	1.50265	308	204.971		1a	1.77199	269	151.807
	1b	1.53257	268	174.87		1b	1.58349	228	143.986
	1c	1.4509	250	172.307		1c	1.69091	280	165.591
	1d	1.56089	308	197.323		1d	1.67491	260	155.232
	1e	1.61079	317	196.798		1e	1.79309	294	163.963
	1f	1.43671	253	176.097		1f	1.73849	259	148.98
	Mean	1.51575	284	187.061		Mean	1.70881	265	154.926
Pcdhg mutant	M3					M3
	3a	1.42479	256	179.676		3a	1.60525	257	160.1
	3b	1.38812	263	189.465		3b	1.56058	209	133.925
	3c	1.47839	234	158.28		3c	1.46375	163	111.358
	3d	1.41762	248	174.941		3d	1.55284	303	195.126
	3e	1.27126	241	189.576		3e	1.41689	193	136.214
	3f	1.49811	227	151.524		3f	1.32417	170	128.382
	Mean	1.41305	244.833	173.91		Mean	1.48725	215.833	144.184
Pcdhg WT	M5					M5
	5a	1.60294	227	141.615		5a	1.95352	246	125.927
	5b	1.44349	246	170.42		5b	2.02402	325	160.572
	5c	1.59358	282	176.96		5c	1.79105	308	171.966
	5d	1.45199	264	181.819		5d	1.6949	231	136.291
	5e	1.29604	237	182.865		5e	1.36216	247	181.33
	5f	1.49047	268	179.809		5f	1.78835	248	138.675
	Mean	1.47975	254	172.248		Mean	1.769	267.5	152.46
Pcdhg mutant	M6					M6
	6a	1.386	269	194.084		6a	1.38624	188	135.619
	6b	1.33837	238	177.828		6b	1.45364	200	137.586
	6c	1.451	259	178.498		6c	1.5059	228	151.404
	6d	1.39116	259	186.176		6d	1.51736	205	135.103
	6e	1.31488	252	191.652		6e	1.45101	219	150.929
	6f	1.41685	250	176.448		6f	1.49621	237	158.4
	Mean	1.38304	254.5	184.114		Mean	1.46839	212.833	144.84
Pcdhg mutant	M7					M7
	7a	1.51385	291	192.225		7a	1.75442	280	159.597
	7b	1.46081	270	184.829		7b	1.69104	276	163.213
	7c					7c
	7d	1.5233	324	212.696		7d	1.78815	285	159.383
	7e	1.60234	304	189.723		7e	2.20991	361	163.355
	7f	1.77875	274	154.041		7f	1.74758	271	155.072
	Mean	1.57581	292.6	186.703		Mean	1.83822	294.6	160.124
Pcdhg WT	M9					M9
	9a	1.47262	259	175.877		9a	1.52916	230	150.409
	9b	1.47509	255	172.871		9b	1.57326	187	118.861
	9c	1.54962	225	145.197		9c	1.56505	174	111.179
	9d	1.52315	222	145.751		9d	1.6375	155	94.6565
	9e	1.4389	183	127.18		9e	1.68585	183	108.551
	9f	1.45712	251	172.258		9f	1.83418	233	127.032
	Mean	1.48608	232.5	156.522		Mean	1.6375	193.667	118.448

## Sheet: Figure 4D 
	Figure 4D source data. Number of Nkx2.1-derived cINs that migrate to dorsal cortex is similar in WT and mutant Pcdhg embryos.
	IZ-SVZ			CP
	Mean # of tdTomato+ cells / mm2			Mean # of tdTomato+ cells / mm2
	Nkx2.1Cre;Ai14;Pcdhg			Nkx2.1Cre;Ai14;Pcdhg
	WT	mutant		WT	mutant
	187.061	173.91		154.926	144.184
	172.248	184.114		152.46	144.84
	156.522	186.703		118.448	160.124
	Figure 4D. Quantifications of the density of tdTomato+ cells in the IZ-SVZ (columns B and C) and CP (columns E and F) of the dorsal cortex in E15.5 Nkx2-1Cre;Ai14 embryos that carry WT or mutant Pcdhg.
