# Supplementary material for: Clustered gamma-protocadherins regulate cortical interneuron programmed cell death
Source: eLife. 2020 Jul 7;9:e55374. doi: 10.7554/eLife.55374 (PMC7373431; doi:10.7554/eLife.55374)
Supplement: Figure 5—source data 1. [file elife-55374-fig5-data1.xlsx]

## Sheet: Figure 5B raw data
Figure 5B source data. Detailed quantifications of CC3+, tdTomato+(Nkx2.1-derived) and CC3+, tdTomato- (non-Nkx2.1-derived) cells from Nkx2.1Cre;Ai14 mice that carry WT or mutant Pcdhg (P0, P3, P7, P10 or P15). Every 6th coronal section across brain was analyzed. Cells were counted in all layers of the neocortex in coronal sections (excluding hippocampus and piriform cortex).
P0											P3											P7											P10											P15
measurements of cell number and area						cells by area		Figure 5C			measurements of cell number and area						cells by area		Figure 5C			measurements of cell number and area						cells by area		Figure 5C			measurements of cell number and area						cells by area		Figure 5C			measurements of cell number and area
mouse/section ID	Area (µm²)	area (mm2)	CC3+	CC3+tom+		CC3+tom+/mm2	CC3+tom-/mm2	mean CC3+tom+/mm2	mean CC3+tom-/mm2		mouse/section ID	Area (µm²)	area (mm2)	CC3+	CC3+tom+		CC3+tom+/mm2	CC3+tom-/mm2	mean CC3+tom+/mm2	mean CC3+tom-/mm2		mouse/section ID	Area (µm²)	area (mm2)	CC3+	CC3+tom+		CC3+tom+/mm2	CC3+tom-/mm2	mean CC3+tom+/mm2	mean CC3+tom-/mm2		mouse/section ID	Area (µm²)	area (mm2)	CC3+	CC3+tom+		CC3+tom+/mm2	CC3+tom-/mm2	mean CC3+tom+/mm2	mean CC3+tom-/mm2		mouse/section ID	Area (µm²)	area (mm2)	CC3+	CC3+tom+
WT											mutant											mutant											WT											mutant
cortex-NAFP0N1 - 1	2022210	2.02221	41	4		1.97803	18.2968	0.61975	19.6215		cortex-NAFP3N1a-1	2818430	2.81843	35	11		3.90288	8.51538	3.0825	9.4031		cortex-NAFP7N3J-1	6896240	6.89624	58	28		4.06018	4.3502	5.64041	4.29498		cortex-NAFP10M1-1	9471170	9.47117	26	3		0.316751	2.42842	0.506911	2.89531		cortex-NAFP15MC-1	6818490	6.81849	6	0
cortex-NAFP0N1 - 2	2091480	2.09148	42	0		0	20.0815				cortex-NAFP3N1a-2	3024390	3.02439	33	8		2.64516	8.26613				cortex-NAFP7N3J-2	7357800	7.3578	68	46		6.25187	2.99002				cortex-NAFP10M1-2	9018690	9.01869	32	4		0.443523	3.10466				cortex-NAFP15MC-2	7186980	7.18698	10	1
cortex-NAFP0N1 - 3	2012300	2.0123	26	1		0.496944	12.4236				cortex-NAFP3N1a-3	3408610	3.40861	19	3		0.880124	4.694				cortex-NAFP7N3J-3	6927590	6.92759	45	31		4.47486	2.0209				cortex-NAFP10M1-3	8063730	8.06373	40	8		0.992097	3.96839				cortex-NAFP15MC-3	7012750	7.01275	7	1
cortex-NAFP0N1 - 4	2023430	2.02343	39	2		0.988421	18.2858				cortex-NAFP3N1a-4	3581520	3.58152	15	4		1.11684	3.07132				cortex-NAFP7N3J-4	7550370	7.55037	71	46		6.09242	3.3111				cortex-NAFP10M1-4	7595360	7.59536	35	3		0.394978	4.2131				cortex-NAFP15MC-4	7384060	7.38406	6	0
cortex-NAFP0N1 - 5	1871230	1.87123	40	3		1.60322	19.7731				cortex-NAFP3N1a-5	3764560	3.76456	27	9		2.39072	4.78144				cortex-NAFP7N3J-5	7357800	7.3578	62	42		5.70823	2.7182				cortex-NAFP10M1-5	7606580	7.60658	31	2		0.26293	3.81249				cortex-NAFP15MC-5	7144510	7.14451	6	0
cortex-NAFP0N1 - 6	1871840	1.87184	22	0		0	11.7531				cortex-NAFP3N1a-6	3451490	3.45149	21	5		1.44865	4.63568				cortex-NAFP7N3J-6	5083720	5.08372	51	25		4.91766	5.11437				cortex-NAFP10M1-6	7987910	7.98791	27	5		0.625946	2.75416				cortex-NAFP15MC-6	6048510	6.04851	5	1
cortex-NAFP0N1 - 7	1835360	1.83536	91	2		1.0897	48.4918				cortex-NAFP3N1a-7	3666260	3.66626	21	5		1.36379	4.36412				cortex-NAFP7N3J-7	6608740	6.60874	61	33		4.99339	4.23681				cortex-NAFP10M1-7	7544330	7.54433	20	5		0.662749	1.98825				cortex-NAFP15MC-7	6379220	6.37922	13	1
cortex-NAFP0N1 - 8	1652670	1.65267	94	1		0.605081	56.2726				cortex-NAFP3N1a-8	3727910	3.72791	28	7		1.87773	5.63318				cortex-NAFP7N3J-8	6130910	6.13091	60	26		4.24081	5.54567				cortex-NAFP10M1-8	6992990	6.99299	16	5		0.715002	1.573				cortex-NAFP15MC-8	6046040	6.04604	5	0
cortex-NAFP0N1 - 9	1654730	1.65473	66	2		1.20866	38.677				cortex-NAFP3N1a-9	2316490	2.31649	79	7		3.02181	31.0815				cortex-NAFP7N3J-9	6155880	6.15588	39	25		4.06116	2.27425				cortex-NAFP10M1-9	7665490	7.66549	26	3		0.391364	3.00046				cortex-NAFP15MC-9	6864400	6.8644	4	0
cortex-NAFP0N1 - 10	1569380	1.56938	39	1		0.637194	24.2134				cortex-NAFP3N1a-10	2503200	2.5032	54	13		5.19335	16.379				cortex-NAFP7N3J-10	6385680	6.38568	34	24		3.75841	1.566				cortex-NAFP10M1-10	7582270	7.58227	18	2		0.263773	2.11019				cortex-NAFP15MC-10	7265450	7.26545	3	0
cortex-NAFP0N1 - 11	1956280	1.95628	17	0		0	8.68996				cortex-NAFP3N1a-11	3486320	3.48632	30	15		4.30253	4.30253				cortex-NAFP7N3J-11	6164560	6.16456	69	36		5.83983	5.35318				mutant											cortex-NAFP15MC-11	8152460	8.15246	6	0
cortex-NAFP0N1 - 12	1821380	1.82138	16	0		0	8.78455				cortex-NAFP3N1a-12	3385680	3.38568	45	24		7.08868	6.20259				cortex-NAFP7N3J-12	7029080	7.02908	67	36		5.12158	4.41025				cortex-NAFP10M3-1	5977930	5.97793	17	2		0.334564	2.50923	0.449927	2.9842		mutant
cortex-NAFP0N1 - 13	1624600	1.6246	20	3		1.84661	10.4641				cortex-NAFP3N1a-13	4130320	4.13032	54	7		1.69478	11.3793				cortex-NAFP7N3J-13	7721680	7.72168	95	55		7.1228	5.18022				cortex-NAFP10M3-2	5435370	5.43537	28	6		1.10388	4.04756				cortex-NAFP15MF-1	6717510	6.71751	6	1
cortex-NAFP0N1 - 14	2019810	2.01981	16	0		0	7.92154				cortex-NAFP3N1a-14	3745680	3.74568	71	14		3.73764	15.2175				cortex-NAFP7N3J-14	8115190	8.11519	91	48		5.91483	5.29871				cortex-NAFP10M3-3	5616000	5.616	20	2		0.356125	3.20513				cortex-NAFP15MF-2	7120590	7.12059	15	3
cortex-NAFP0N1 - 15	2081740	2.08174	19	0		0	9.12698				cortex-NAFP3N1a-15	3660870	3.66087	63	17		4.6437	12.5653				cortex-NAFP7N3J-15	7468150	7.46815	92	60		8.03412	4.28486				cortex-NAFP10M3-4	5945420	5.94542	20	2		0.336393	3.02754				cortex-NAFP15MF-3	7555170	7.55517	15	1
cortex-NAFP0N1 - 16	1594680	1.59468	21	0		0	13.1688				cortex-NAFP3N1a-16	3739100	3.7391	50	15		4.01166	9.36054				cortex-NAFP7N3J-16	6736140	6.73614	74	40		5.93812	5.0474				cortex-NAFP10M3-5	5350860	5.35086	16	0		0	2.99017				cortex-NAFP15MF-4	7546510	7.54651	20	1
cortex-NAFP0N1 - 17	1425230	1.42523	23	1		0.701641	15.4361				mutant											cortex-NAFP7N3J-17	6605020	6.60502	110	55		8.327	8.327				cortex-NAFP10M3-6	5208570	5.20857	20	2		0.383983	3.45584				cortex-NAFP15MF-5	6869710	6.86971	19	0
cortex-NAFP0N1 - 18	1412720	1.41272	16	0		0	11.3257				cortex-NAFP3N2a-1	3449350	3.44935	62	18		5.21837	12.756	5.76521	10.6623		cortex-NAFP7N3J-18	7196200	7.1962	86	48		6.67019	5.28056				cortex-NAFP10M3-7	4805760	4.80576	23	2		0.416167	4.36976				cortex-NAFP15MF-6	7048720	7.04872	14	0
WT											cortex-NAFP3N2a-2	3412470	3.41247	42	20		5.86086	6.44694				mutant											cortex-NAFP10M3-8	5477560	5.47756	24	4		0.730252	3.65126				cortex-NAFP15MF-7	7770880	7.77088	15	0
cortex-NAFP0N2 - 1	2150920	2.15092	36	0		0	16.737	0.844986	18.2512		cortex-NAFP3N2a-3	3273220	3.27322	38	16		4.88815	6.72121				cortex-NAFP7N4-1	5209550	5.20955	71	30		5.75865	7.87016	4.62848	5.8675		cortex-NAFP10M3-9	5164390	5.16439	22	3		0.580901	3.67904				cortex-NAFP15MF-8	7712920	7.71292	12	0
cortex-NAFP0N2 - 2	2125120	2.12512	29	1		0.470562	13.1757				cortex-NAFP3N2a-4	2925610	2.92561	72	19		6.49437	18.1159				cortex-NAFP7N4-2	5424370	5.42437	49	31		5.71495	3.31836				cortex-NAFP10M3-10	7303920	7.30392	27	3		0.410738	3.28591				cortex-NAFP15MF-9	6762610	6.76261	16	4
cortex-NAFP0N2 - 3	1764880	1.76488	28	0		0	15.8651				cortex-NAFP3N2a-5	3373200	3.3732	25	13		3.85391	3.55745				cortex-NAFP7N4-3	5440010	5.44001	73	41		7.53675	5.88234				cortex-NAFP10M3-11	7362340	7.36234	24	5		0.679132	2.5807				cortex-NAFP15MF-10	6267600	6.2676	13	2
cortex-NAFP0N2 - 4	1867050	1.86705	15	1		0.535604	7.49846				cortex-NAFP3N2a-6	2848150	2.84815	90	21		7.37321	24.2263				cortex-NAFP7N4-4	5026930	5.02693	54	28		5.57	5.17214				cortex-NAFP10M3-12	6808480	6.80848	30	1		0.146876	4.25939				mutant
cortex-NAFP0N2 - 5	1962390	1.96239	28	7		3.56708	10.7012				cortex-NAFP3N2a-7	3289600	3.2896	26	12		3.64786	4.25584				cortex-NAFP7N4-5	5742580	5.74258	75	29		5.04999	8.01034				cortex-NAFP10M3-13	7253850	7.25385	26	5		0.689289	2.89501				cortex-NAFP15MR-1	5473990	5.47399	10	0
cortex-NAFP0N2 - 6	2060910	2.06091	43	0		0	20.8646				cortex-NAFP3N2a-8	3102450	3.10245	28	16		5.15721	3.86791				cortex-NAFP7N4-6	6470910	6.47091	91	47		7.26328	6.79966				cortex-NAFP10M3-14	6092410	6.09241	21	3		0.492416	2.9545				cortex-NAFP15MR-2	6165630	6.16563	13	2
cortex-NAFP0N2 - 7	2203020	2.20302	76	5		2.26961	32.2285				cortex-NAFP3N2a-9	3145010	3.14501	40	15		4.76946	7.9491				cortex-NAFP7N4-7	6766550	6.76655	69	28		4.138	6.05922				cortex-NAFP10M3-15	6122050	6.12205	10	1		0.163344	1.4701				cortex-NAFP15MR-3	6274990	6.27499	26	4
cortex-NAFP0N2 - 8	1717580	1.71758	38	0		0	22.1242				cortex-NAFP3N2a-10	3483510	3.48351	47	26		7.46374	6.0284				cortex-NAFP7N4-8	5801720	5.80172	54	26		4.48143	4.82616				cortex-NAFP10M3-16	6777380	6.77738	28	8		1.1804	2.95099				cortex-NAFP15MR-4	7707800	7.7078	18	1
cortex-NAFP0N2 - 9	2142910	2.14291	49	3		1.39997	21.4661				cortex-NAFP3N2a-11	3343710	3.34371	55	12		3.58883	12.86				cortex-NAFP7N4-9	5529750	5.52975	50	28		5.06352	3.97848				cortex-NAFP10M3-17	6137300	6.1373	17	2		0.325876	2.44407				cortex-NAFP15MR-5	7295060	7.29506	14	2
cortex-NAFP0N2 - 10	1934190	1.93419	22	2		1.03402	10.3402				cortex-NAFP3N2a-12	3596620	3.59662	63	27		7.50705	10.0094				cortex-NAFP7N4-10	6787610	6.78761	39	21		3.09387	2.65189				cortex-NAFP10M3-18	7147950	7.14795	24	5		0.699501	2.6581				cortex-NAFP15MR-6	7128810	7.12881	18	0
cortex-NAFP0N2 - 11	2185400	2.1854	30	1		0.457582	13.2699				cortex-NAFP3N2a-13	3541770	3.54177	58	18		5.0822	11.2938				cortex-NAFP7N4-11	5509930	5.50993	76	33		5.98919	7.80409				cortex-NAFP10M3-19	6965180	6.96518	19	5		0.717857	2.01				cortex-NAFP15MR-7	6526750	6.52675	20	3
cortex-NAFP0N2 - 12	1516130	1.51613	57	0		0	37.5957				cortex-NAFP3N2a-14	3619490	3.61949	54	22		6.0782	8.84102				cortex-NAFP7N4-12	6327610	6.32761	55	22		3.47683	5.21524				cortex-NAFP10M3-20	7331190	7.33119	25	6		0.818421	2.59167				cortex-NAFP15MR-8	5793890	5.79389	5	1
cortex-NAFP0N2 - 13	1664450	1.66445	57	2		1.2016	33.0439				cortex-NAFP3N2a-15	3973450	3.97345	84	34		8.5568	12.5835				cortex-NAFP7N4-13	5016440	5.01644	52	22		4.38558	5.98034				cortex-NAFP10M3-21	6863360	6.86336	17	0		0	2.47692				cortex-NAFP15MR-9	6677440	6.67744	11	2
cortex-NAFP0N2 - 14	1799320	1.79932	19	2		1.11153	9.44801				cortex-NAFP3N2a-16	3387850	3.38785	66	21		6.19862	13.2828				cortex-NAFP7N4-14	4948360	4.94836	42	17		3.43548	5.05218				cortex-NAFP10M3-22	7085030	7.08503	23	0		0	3.24628				cortex-NAFP15MR-10	6924810	6.92481	19	0
cortex-NAFP0N2 - 15	1594290	1.59429	16	1		0.627238	9.40858				cortex-NAFP3N2a-17	4062290	4.06229	54	13		3.20017	10.0928				cortex-NAFP7N4-15	5469380	5.46938	45	22		4.02239	4.20523				cortex-NAFP10M3-23	7337420	7.33742	13	1		0.136288	1.63545				cortex-NAFP15MR-11	6775960	6.77596	17	1
mutant											cortex-NAFP3N2a-18	3955460	3.95546	65	24		6.06756	10.3654				cortex-NAFP7N4-16	4609260	4.60926	47	16		3.47127	6.72559				cortex-NAFP10M3-24	7461240	7.46124	33	1		0.134026	4.28883				cortex-NAFP15MR-12	7081670	7.08167	13	1
cortex-NAFP0N4 - 1	1898460	1.89846	20	3		1.58023	8.95463	1.76723	20.634		cortex-NAFP3N2a-19	3602650	3.60265	74	24		6.66176	13.8787				cortex-NAFP7N4-17	5233610	5.23361	36	13		2.48395	4.39467				cortex-NAFP10M3-25	7285890	7.28589	17	3		0.411755	1.92152				WT
cortex-NAFP0N4 - 2	1943380	1.94338	36	2		1.02913	17.4953				cortex-NAFP3N2a-20	3444370	3.44437	64	18		5.22592	13.3551				cortex-NAFP7N4-18	5371510	5.37151	80	40		7.4467	7.4467				mutant											cortex-NAFP15ME-1	11660200	11.6602	67	6
cortex-NAFP0N4 - 3	2017280	2.01728	23	4		1.98287	9.41862				cortex-NAFP3N2a-21	3929850	3.92985	78	28		7.12495	12.7231				cortex-NAFP7N4-19	3854440	3.85444	36	8		2.07553	7.26435				cortex-NAFP10M4-1	5765070	5.76507	26	2		0.346917	4.163	0.559613	2.35245		cortex-NAFP15ME-2	12500900	12.5009	77	5
cortex-NAFP0N4 - 4	1970850	1.97085	15	2		1.01479	6.59614				cortex-NAFP3N2a-22	3521380	3.52138	64	24		6.81551	11.3592				cortex-NAFP7N4-20	4945930	4.94593	50	19		3.84154	6.26778				cortex-NAFP10M4-2	5681760	5.68176	19	3		0.528005	2.81603				cortex-NAFP15ME-3	12146400	12.1464	49	3
cortex-NAFP0N4 - 5	2026580	2.02658	33	4		1.97377	14.3098				mutant											cortex-NAFP7N4-21	5231000	5.231	45	17		3.24986	5.35271				cortex-NAFP10M4-3	6314460	6.31446	36	5		0.791833	4.90937				cortex-NAFP15ME-4	11968700	11.9687	52	6
cortex-NAFP0N4 - 6	2030620	2.03062	45	8		3.93968	18.221				cortex-NAFP3N3a-1	2995920	2.99592	32	7	11.6667	2.33651	8.34468	3.43238	9.74882		cortex-NAFP7N4-22	3973970	3.97397	52	17		4.27784	8.80731				cortex-NAFP10M4-4	5935390	5.93539	26	2		0.336962	4.04354				cortex-NAFP15ME-5	12049000	12.049	47	5
cortex-NAFP0N4 - 7	1593330	1.59333	70	4		2.51047	41.4227				cortex-NAFP3N3a-2	2871430	2.87143	33	6		2.08955	9.40298				mutant											cortex-NAFP10M4-5	6086150	6.08615	32	10		1.64307	3.61476				cortex-NAFP15ME-6	10981700	10.9817	55	2
cortex-NAFP0N4 - 8	1548640	1.54864	90	5		3.22864	54.8869				cortex-NAFP3N3a-3	3596410	3.59641	26	11		3.05861	4.17083				cortex-NAFP7N7-1	5476670	5.47667	30	13		2.37371	3.10408	3.7819	4.50627		cortex-NAFP10M4-6	5667040	5.66704	20	3		0.529377	2.9998				cortex-NAFP15ME-7	12975900	12.9759	47	6
cortex-NAFP0N4 - 9	1882710	1.88271	103	1		0.531149	54.1772				cortex-NAFP3N3a-4	3503210	3.50321	23	9		2.56907	3.99633				cortex-NAFP7N7-2	4973600	4.9736	29	11		2.21168	3.61911				cortex-NAFP10M4-7	6568100	6.5681	18	1		0.152251	2.58827				cortex-NAFP15ME-8	13306900	13.3069	49	3
cortex-NAFP0N4 - 10	1769800	1.7698	72	3		1.69511	38.9875				cortex-NAFP3N3a-5	3873570	3.87357	11	8		2.06528	0.774479				cortex-NAFP7N7-3	5083170	5.08317	54	32		6.29528	4.32801				cortex-NAFP10M4-8	6317390	6.31739	24	4		0.633173	3.16586				cortex-NAFP15ME-9	10986800	10.9868	65	4
cortex-NAFP0N4 - 11	2250580	2.25058	19	2		0.88866	7.55361				cortex-NAFP3N3a-6	3680200	3.6802	23	11		2.98897	3.26069				cortex-NAFP7N7-4	5314970	5.31497	34	21		3.9511	2.44592				cortex-NAFP10M4-9	6996920	6.99692	16	3		0.42876	1.85796				cortex-NAFP15ME-10	11185800	11.1858	42	2
cortex-NAFP0N4 - 12	2285940	2.28594	23	0		0	10.0615				cortex-NAFP3N3a-7	4105860	4.10586	27	12		2.92265	3.65332				cortex-NAFP7N7-5	5579850	5.57985	20	13		2.32981	1.25451				cortex-NAFP10M4-10	6996120	6.99612	17	2		0.285873	2.14405				cortex-NAFP15ME-11	11905900	11.9059	34	6
cortex-NAFP0N4 - 13	1689410	1.68941	23	3		1.77577	11.8385				cortex-NAFP3N3a-8	3358470	3.35847	16	7		2.08428	2.67979				cortex-NAFP7N7-6	5467550	5.46755	18	13		2.37766	0.914486				cortex-NAFP10M4-11	7481590	7.48159	14	2		0.267323	1.60394				WT
cortex-NAFP0N4 - 14	2254700	2.2547	28	3		1.33055	11.0879				cortex-NAFP3N3a-9	2316320	2.31632	58	13		5.61235	19.4274				cortex-NAFP7N7-7	4471750	4.47175	55	31		6.93241	5.36703				cortex-NAFP10M4-12	7468370	7.46837	16	2		0.267796	1.87457				cortex-NAFP15MH-1	14125300	14.1253	63	8
cortex-NAFP0N4 - 15	2228920	2.22892	25	5		2.24324	8.97296				cortex-NAFP3N3a-10	3184650	3.18465	56	16		5.0241	12.5602				cortex-NAFP7N7-8	5801830	5.80183	75	32		5.5155	7.41145				cortex-NAFP10M4-13	8001810	8.00181	28	5		0.624859	2.87435				cortex-NAFP15MH-2	14954000	14.954	41	4
cortex-NAFP0N4 - 16	2351460	2.35146	44	6		2.55161	16.1602				cortex-NAFP3N3a-11	3221050	3.22105	44	20		6.20916	7.45099				cortex-NAFP7N7-9	5427490	5.42749	51	15		2.76371	6.6329				cortex-NAFP10M4-14	7213280	7.21328	17	5		0.693166	1.6636				cortex-NAFP15MH-3	15302300	15.3023	46	8
mutant											cortex-NAFP3N3a-12	2320270	2.32027	72	11		4.74083	26.29				cortex-NAFP7N7-10	5834930	5.83493	46	19		3.25625	4.6273				cortex-NAFP10M4-15	6709450	6.70945	24	5		0.745218	2.83183				cortex-NAFP15MH-4	14325100	14.3251	28	1
cortex-NAFP0N5 - 1	1706570	1.70657	47	1		0.585971	26.9547	1.82699	29.8519		cortex-NAFP3N3a-13	2735710	2.73571	47	4		1.46214	15.718				cortex-NAFP7N7-11	5350840	5.35084	53	23		4.29839	5.6066				cortex-NAFP10M4-16	6679700	6.6797	19	4		0.598829	2.24561				cortex-NAFP15MH-5	13990300	13.9903	45	3
cortex-NAFP0N5 - 2	1730550	1.73055	33	3		1.73355	17.3355				cortex-NAFP3N3a-14	3766740	3.76674	63	14		3.71674	13.0086				cortex-NAFP7N7-12	5483430	5.48343	61	21		3.82972	7.2947				cortex-NAFP10M4-17	6565020	6.56502	13	1		0.152322	1.82787				cortex-NAFP15MH-6	14015600	14.0156	44	4
cortex-NAFP0N5 - 3	1695510	1.69551	33	2		1.17959	18.2836				cortex-NAFP3N3a-15	4054280	4.05428	77	23		5.67302	13.3193				cortex-NAFP7N7-13	5707580	5.70758	50	13		2.27767	6.48261				cortex-NAFP10M4-18	7060870	7.06087	15	6		0.849754	1.27463				cortex-NAFP15MH-7	12938900	12.9389	57	3
cortex-NAFP0N5 - 4	1653630	1.65363	29	1		0.60473	16.9324				cortex-NAFP3N3a-16	3938170	3.93817	65	17		4.31673	12.1884				cortex-NAFP7N7-14	5568320	5.56832	35	13		2.33464	3.95092				cortex-NAFP10M4-19	6205610	6.20561	22	5		0.805723	2.73946				cortex-NAFP15MH-8	15002400	15.0024	33	2
cortex-NAFP0N5 - 5	1871170	1.87117	20	5		2.67212	8.01637				cortex-NAFP3N3a-17	3828490	3.82849	47	11		2.8732	9.40319				cortex-NAFP7N7-15	6005760	6.00576	47	21		3.49664	4.32918				cortex-NAFP10M4-20	5978500	5.9785	22	5		0.83633	2.84352				cortex-NAFP15MH-9	15249500	15.2495	27	3
cortex-NAFP0N5 - 6	1803240	1.80324	37	6		3.32734	17.1913				cortex-NAFP3N3a-18	3865960	3.86596	61	14		3.62135	12.1574				cortex-NAFP7N7-16	5587700	5.5877	63	32		5.72686	5.5479				cortex-NAFP10M4-21	7499200	7.4992	27	5		0.666738	2.93365				cortex-NAFP15MH-10	13482300	13.4823	24	3
cortex-NAFP0N5 - 7	1175610	1.17561	112	3		2.55187	92.7178				cortex-NAFP3N3a-19	3464590	3.46459	54	13		3.75225	11.834				cortex-NAFP7N7-17	6228550	6.22855	55	29		4.65598	4.17433				cortex-NAFP10M4-22	7168770	7.16877	11	4		0.557976	0.976458				cortex-NAFP15MH-11	14489000	14.489	19	3
cortex-NAFP0N5 - 8	1312960	1.31296	81	1		0.761638	60.931				cortex-NAFP3N3a-20	3748730	3.74873	41	9		2.40081	8.53622				cortex-NAFP7N7-18	5221570	5.22157	39	18		3.44724	4.02178				cortex-NAFP10M4-23	7605850	7.60585	17	5		0.657389	1.57773				cortex-NAFP15MH-12	10711200	10.7112	27	2
cortex-NAFP0N5 - 9	1147350	1.14735	63	4		3.48629	51.4228				cortex-NAFP3N3a-21	3512360	3.51236	32	9		2.56238	6.5483				WT											cortex-NAFP10M4-24	7208820	7.20882	13	3		0.416157	1.38719				cortex-NAFP15MH-13	12045400	12.0454	44	6
cortex-NAFP0N5 - 10	1311610	1.31161	71	6		4.57453	49.5574				mutant											cortex-NAFP7W1-1	1871630	1.87163	31	10		5.34294	11.2202	1.87756	5.68123		cortex-NAFP10M4-25	7801920	7.80192	25	2		0.256347	2.94799				WT
cortex-NAFP0N5 - 11	1805760	1.80576	24	2		1.10757	12.1832				cortex-NAFP3N4a-1	3332240	3.33224	22	5	7.54545	1.50049	5.10167	2.18771	8.37063		cortex-NAFP7W1-2	2662840	2.66284	27	8		3.00431	7.13524				cortex-NAFP10M4-26	7730300	7.7303	19	5		0.646805	1.81106				cortex-NAFP15MW-1	5933930	5.93393	10	1
cortex-NAFP0N5 - 12	1873060	1.87306	22	2		1.06777	10.6777				cortex-NAFP3N4a-2	3505230	3.50523	18	2		0.570576	4.56461				cortex-NAFP7W1-3	6062730	6.06273	33	9		1.48448	3.95861				cortex-NAFP10M4-27	7289340	7.28934	16	4		0.548747	1.64624				cortex-NAFP15MW-2	5870890	5.87089	11	1
cortex-NAFP0N5 - 13	1825250	1.82525	42	6		3.28722	19.7233				cortex-NAFP3N4a-3	3579910	3.57991	42	8		2.23469	9.49745				cortex-NAFP7W1-4	2768460	2.76846	20	1		0.361212	6.86302				cortex-NAFP10M4-28	7440250	7.44025	11	5		0.67202	0.806425				cortex-NAFP15MW-3	6791890	6.79189	2	0
cortex-NAFP0N5 - 14	1797500	1.7975	35	2		1.11266	18.3588				cortex-NAFP3N4a-4	3556260	3.55626	27	7		1.96836	5.62389				cortex-NAFP7W1-5	5791130	5.79113	45	10		1.72678	6.04373				cortex-NAFP10M4-29	7054410	7.05441	12	3		0.425266	1.2758				cortex-NAFP15MW-4	6402320	6.40232	1	0
cortex-NAFP0N5 - 15	1908150	1.90815	30	2		1.04814	14.6739				cortex-NAFP3N4a-5	3136900	3.1369	21	6		1.91272	4.78179				cortex-NAFP7W1-6	6826060	6.82606	41	5		0.732487	5.27391				cortex-NAFP10M4-30	7085630	7.08563	11	3		0.423392	1.12905				cortex-NAFP15MW-5	7084190	7.08419	3	0
cortex-NAFP0N5 - 16	1825410	1.82541	35	1		0.547822	18.626				cortex-NAFP3N4a-6	3135460	3.13546	18	6		1.91359	3.82719				cortex-NAFP7W1-7	5165630	5.16563	41	16		3.0974	4.83968				mutant											cortex-NAFP15MW-6	7111560	7.11156	3	0
cortex-NAFP0N5 - 17	1824830	1.82483	92	1		0.547996	49.8677				cortex-NAFP3N4a-7	3686870	3.68687	18	2		0.542466	4.33972				cortex-NAFP7W1-8	6828490	6.82849	48	8		1.17156	5.85781				cortex-NAFP10N1-1	5963570	5.96357	33	13		2.1799	3.3537	1.32642	3.12468		cortex-NAFP15MW-7	6807480	6.80748	0	0
cortex-NAFP0N5 - 18	1859460	1.85946	68	5		2.68895	33.8808				cortex-NAFP3N4a-8	3612190	3.61219	31	10		2.7684	5.81365				cortex-NAFP7W1-9	4164460	4.16446	50	8		1.92102	10.0853				cortex-NAFP10N1-2	5540520	5.54052	33	12		2.16586	3.79026				cortex-NAFP15MW-8	6638130	6.63813	5	0
mutant											cortex-NAFP3N4a-9	3381660	3.38166	25	8		2.3657	5.02712				cortex-NAFP7W1-10	5000270	5.00027	42	8		1.59991	6.79963				cortex-NAFP10N1-3	5037640	5.03764	36	8		1.58805	5.55816				cortex-NAFP15MW-9	6330890	6.33089	1	0
cortex-NAFP0N6 - 1	1755400	1.7554	34	4		2.27868	17.0901	1.66882	16.9301		cortex-NAFP3N4a-10	3064860	3.06486	28	10		3.26279	5.87303				cortex-NAFP7W1-11	4900180	4.90018	53	14		2.85704	7.95889				cortex-NAFP10N1-4	4669950	4.66995	25	9		1.92722	3.42616				cortex-NAFP15MW-10	6143560	6.14356	3	0
cortex-NAFP0N6 - 2	1698790	1.69879	24	2		1.17731	12.9504				cortex-NAFP3N4a-11	4709700	4.7097	75	15		3.18492	12.7397				cortex-NAFP7W1-12	5792980	5.79298	39	5		0.863114	5.86917				cortex-NAFP10N1-5	6216980	6.21698	32	9		1.44765	3.69955				cortex-NAFP15MW-11	6649440	6.64944	1	0
cortex-NAFP0N6 - 3	2019720	2.01972	29	3		1.48535	12.8731				cortex-NAFP3N4a-12	4029380	4.02938	53	7		1.73724	11.4161				cortex-NAFP7W1-13	5054960	5.05496	39	9		1.78043	5.93477				cortex-NAFP10N1-6	6136540	6.13654	31	15		2.44437	2.60733				cortex-NAFP15MW-12	6642380	6.64238	1	0
cortex-NAFP0N6 - 4	1631300	1.6313	7	0		0	4.29106				cortex-NAFP3N4a-13	3585330	3.58533	56	10		2.78914	12.8301				cortex-NAFP7W1-14	5307660	5.30766	27	11		2.07248	3.01451				cortex-NAFP10N1-7	6489890	6.48989	32	10		1.54086	3.38989
cortex-NAFP0N6 - 5	1855340	1.85534	17	1		0.538985	8.62376				cortex-NAFP3N4a-14	3637930	3.63793	47	11		3.0237	9.89574				cortex-NAFP7W1-15	4796900	4.7969	41	17		3.54396	5.00323				cortex-NAFP10N1-8	5455160	5.45516	19	5		0.916563	2.56638
cortex-NAFP0N6 - 6	1652120	1.65212	12	3		1.81585	5.44755				cortex-NAFP3N4a-15	3426080	3.42608	57	12		3.50255	13.1345				cortex-NAFP7W1-16	5059770	5.05977	37	8		1.5811	5.73149				cortex-NAFP10N1-9	5660300	5.6603	30	11		1.94336	3.35671
cortex-NAFP0N6 - 7	1525540	1.52554	69	1		0.655506	44.5744				cortex-NAFP3N4a-16	3345410	3.34541	56	10		2.98917	13.7502				cortex-NAFP7W1-17	4688910	4.68891	17	3		0.639808	2.98577				cortex-NAFP10N1-10	5101600	5.1016	34	13		2.54822	4.11636
cortex-NAFP0N6 - 8	1816080	1.81608	25	6		3.30382	10.4621				cortex-NAFP3N4a-17	3168860	3.16886	25	4		1.26228	6.62699				cortex-NAFP7W1-18	5368900	5.3689	13	5		0.931289	1.49006				cortex-NAFP10N1-11	5720690	5.72069	21	5		0.87402	2.79687
cortex-NAFP0N6 - 9	1710900	1.7109	16	1		0.584488	8.76732				cortex-NAFP3N4a-18	3305540	3.30554	31	7		2.11766	7.26054				cortex-NAFP7W1-19	6129080	6.12908	53	11		1.79472	6.85258				cortex-NAFP10N1-12	6107510	6.10751	14	1		0.163733	2.12853
cortex-NAFP0N6 - 10	1773890	1.77389	24	3		1.6912	11.8384				cortex-NAFP3N4a-19	2745760	2.74576	53	6		2.18519	17.1173				cortex-NAFP7W1-20	5442420	5.44242	30	10		1.83742	3.67484				cortex-NAFP10N1-13	5814650	5.81465	28	7		1.20386	3.61157
cortex-NAFP0N6 - 11	1743660	1.74366	30	6		3.44104	13.7642				cortex-NAFP3N4a-20	3018510	3.01851	59	10		3.31289	16.2332				cortex-NAFP7W1-21	5528120	5.52812	21	6		1.08536	2.7134				cortex-NAFP10N1-14	6165670	6.16567	19	5		0.810942	2.27064
cortex-NAFP0N6 - 12	1721520	1.72152	36	2		1.16176	19.75				cortex-NAFP3N4a-21	3431850	3.43185	21	6		1.74833	4.37082				WT											cortex-NAFP10N1-15	5507780	5.50778	20	3		0.544684	3.08654
cortex-NAFP0N6 - 13	1891390	1.89139	29	4		2.11485	13.2178				cortex-NAFP3N4a-22	3234270	3.23427	18	4		1.23676	4.32864				cortex-NAFP7W2-1	5695940	5.69594	49	13		2.28233	6.32029	2.04967	5.16683		cortex-NAFP10N1-16	6418070	6.41807	25	6		0.93486	2.96039
cortex-NAFP0N6 - 14	1951850	1.95185	75	5		2.56167	35.8634				WT											cortex-NAFP7W2-2	5577650	5.57765	28	7		1.25501	3.76503				cortex-NAFP10N1-17	4335200	4.3352	22	3		0.69201	4.38273
cortex-NAFP0N6 - 15	1800370	1.80037	66	4		2.22177	34.4374				cortex-NAFP3M1a-1	1946150	1.94615	32	5	4.45833	2.56918	13.8735	1.37835	8.27411		cortex-NAFP7W2-3	5218920	5.21892	42	12		2.29933	5.74832				cortex-NAFP10N1-18	5214610	5.21461	27	11		2.10946	3.0683
WT											cortex-NAFP3M1a-2	2032930	2.03293	16	1		0.491901	7.37851				cortex-NAFP7W2-4	5058430	5.05843	32	6		1.18614	5.13993				cortex-NAFP10N1-19	6293100	6.2931	18	4		0.635617	2.22466
cortex-NAFP0N1A - 1	2347810	2.34781	15	3		1.27779	5.11115	0.951656	17.4167		cortex-NAFP3M1a-3	2108820	2.10882	45	3		1.4226	19.9164				cortex-NAFP7W2-5	5426560	5.42656	40	14		2.5799	4.79125				cortex-NAFP10N1-20	5974050	5.97405	24	5		0.836953	3.18042
cortex-NAFP0N1A - 2	1662480	1.66248	27	1		0.601511	15.6393				cortex-NAFP3M1a-4	2047470	2.04747	51	6		2.93045	21.9783				cortex-NAFP7W2-6	5248150	5.24815	40	9		1.71489	5.90684				cortex-NAFP10N1-21	6325390	6.32539	28	11		1.73902	2.68758
cortex-NAFP0N1A - 3	1845990	1.84599	23	4		2.16686	10.2926				cortex-NAFP3M1a-5	3400410	3.40041	34	7		2.05858	7.94022				cortex-NAFP7W2-7	6047150	6.04715	42	12		1.98441	4.96101				cortex-NAFP10N1-22	5999460	5.99946	17	6		1.00009	1.8335
cortex-NAFP0N1A - 4	1440990	1.44099	89	4		2.77587	58.9872				cortex-NAFP3M1a-6	3667390	3.66739	17	4		1.09069	3.54476				cortex-NAFP7W2-8	6374820	6.37482	46	13		2.03927	5.17662				cortex-NAFP10N1-23	6625920	6.62592	22	5		0.754612	2.56568
cortex-NAFP0N1A - 5	2127520	2.12752	23	0		0	10.8107				cortex-NAFP3M1a-7	3584790	3.58479	30	3		0.836869	7.53182				cortex-NAFP7W2-9	5898860	5.89886	36	10		1.69524	4.40763				cortex-NAFP10N1-24	6007560	6.00756	19	5		0.832285	2.3304
cortex-NAFP0N1A - 6	2325300	2.3253	13	0		0	5.59068				cortex-NAFP3M1a-8	3927870	3.92787	40	2		0.509182	9.67445				cortex-NAFP7W2-10	6360170	6.36017	42	12		1.88674	4.71686				WT
cortex-NAFP0N1A - 7	2135350	2.13535	14	2		0.936615	5.61969				cortex-NAFP3M1a-9	3314830	3.31483	29	2		0.603349	8.14521				cortex-NAFP7W2-11	5065590	5.06559	38	9		1.77669	5.7249				cortex-NAFP10N4-1	7076740	7.07674	19	7		0.989156	1.6957	0.826451	2.60551
cortex-NAFP0N1A - 8	2167940	2.16794	27	3		1.3838	11.0704				cortex-NAFP3M1a-10	3269370	3.26937	21	5		1.52935	4.89391				cortex-NAFP7W2-12	5965190	5.96519	56	13		2.17931	7.20849				cortex-NAFP10N4-2	7043520	7.04352	17	4		0.567898	1.84567
cortex-NAFP0N1A - 9	2195820	2.19582	34	0		0	15.484				cortex-NAFP3M1a-11	4045870	4.04587	38	7		1.73016	7.66213				cortex-NAFP7W2-13	5771960	5.77196	43	13		2.25227	5.19754				cortex-NAFP10N4-3	6862010	6.86201	23	9		1.31157	2.04022
cortex-NAFP0N1A - 10	1876910	1.87691	24	1		0.532791	12.2542				cortex-NAFP3M1a-12	3665790	3.66579	28	4		1.09117	6.54702				cortex-NAFP7W2-14	5432430	5.43243	30	6		1.10448	4.41791				cortex-NAFP10N4-4	6908060	6.90806	25	8		1.15807	2.46089
cortex-NAFP0N1A - 11	1601170	1.60117	20	1		0.624543	11.8663				cortex-NAFP3M1a-13	4039160	4.03916	34	5		1.23788	7.17971				cortex-NAFP7W2-15	5938690	5.93869	60	13		2.18903	7.9142				cortex-NAFP10N4-5	6676590	6.67659	28	6		0.898662	3.2951
cortex-NAFP0N1A - 12	2076530	2.07653	35	2		0.963145	15.8919				cortex-NAFP3M1a-14	3617210	3.61721	44	7		1.93519	10.2289				cortex-NAFP7W2-16	5179300	5.1793	49	14		2.70307	6.75767				cortex-NAFP10N4-6	6492370	6.49237	27	4		0.616108	3.54262
cortex-NAFP0N1A - 13	2089280	2.08928	22	2		0.957268	9.57268				cortex-NAFP3M1a-15	3361490	3.36149	25	2		0.594974	6.8422				cortex-NAFP7W2-17	5192660	5.19266	37	15		2.88869	4.23675				cortex-NAFP10N4-7	5755270	5.75527	35	2		0.347508	5.73388
cortex-NAFP0N1A - 14	1601700	1.6017	65	3		1.87301	38.7089				cortex-NAFP3M1a-16	3752600	3.7526	32	8		2.13186	6.39557				cortex-NAFP7W2-18	4374210	4.37421	38	12		2.74335	5.94393				cortex-NAFP10N4-8	6020930	6.02093	22	4		0.664349	2.98957
cortex-NAFP0N1A - 15	1818380	1.81838	71	3		1.64982	37.3959				cortex-NAFP3M1a-17	3191680	3.19168	14	6		1.87989	2.50652				cortex-NAFP7W2-19	4572170	4.57217	37	13		2.84329	5.24915				cortex-NAFP10N4-9	6319290	6.31929	30	6		0.949474	3.7979
cortex-NAFP0N1A - 16	1630510	1.63051	12	1		0.613305	6.74636				cortex-NAFP3M1a-18	3174360	3.17436	22	6		1.89014	5.04039				cortex-NAFP7W2-20	3475580	3.47558	22	7		2.01405	4.31583				cortex-NAFP10N4-10	6070690	6.07069	22	3		0.494178	3.12979
cortex-NAFP0N1A - 17	1804270	1.80427	16	0		0	8.86785				cortex-NAFP3M1a-19	3141310	3.14131	32	3		0.955016	9.23182				cortex-NAFP7W2-21	3564640	3.56464	19	7		1.96373	3.3664				cortex-NAFP10N4-11	5305670	5.30567	12	4		0.75391	1.50782
cortex-NAFP0N1A - 18	1629290	1.62929	22	2		1.22753	12.2753				cortex-NAFP3M1a-20	2959060	2.95906	13	3		1.01384	3.37945				cortex-NAFP7W2-22	5059120	5.05912	29	8		1.5813	4.15092				cortex-NAFP10N4-12	5008150	5.00815	27	8		1.5974	3.79382
cortex-NAFP0N1A - 19	989072	0.989072	47	1		1.01105	46.5082				cortex-NAFP3M1a-21	3081110	3.08111	16	3		0.973675	4.21926				cortex-NAFP7W2-23	5556160	5.55616	30	11		1.97978	3.41963				cortex-NAFP10N4-13	6735710	6.73571	17	3		0.445387	2.07847
cortex-NAFP0N1A - 20	2281960	2.28196	23	1		0.43822	9.64084				cortex-NAFP3M1a-22	3329610	3.32961	22	4		1.20134	5.40604				WT											cortex-NAFP10N4-14	7219580	7.21958	21	6		0.831073	2.07768
WT											cortex-NAFP3M1a-23	6474850	6.47485	30	6		0.926662	3.70665				cortex-NAFP7W3-1	5182430	5.18243	46	18		3.47327	5.40287	2.53432	5.62		cortex-NAFP10N4-15	7299460	7.29946	13	6		0.821979	0.958975
cortex-NAFP0N2A - 1	1557210	1.55721	8	0		0	5.13739	0.406174	12.0397		cortex-NAFP3M1a-24	3386350	3.38635	57	5		1.47652	15.3558				cortex-NAFP7W3-2	4476660	4.47666	55	23		5.13776	7.14819				cortex-NAFP10N4-16	6825940	6.82594	20	5		0.7325	2.1975
cortex-NAFP0N2A - 2	1455500	1.4555	9	0		0	6.18344				WT											cortex-NAFP7W3-3	3960670	3.96067	39	19		4.79717	5.04965				cortex-NAFP10N4-17	7036320	7.03632	29	6		0.852718	3.26875
cortex-NAFP0N2A - 3	1882580	1.88258	10	0		0	5.31186				cortex-NAFP3M2a-1	2770930	2.77093	27	6	5.68421	2.16534	7.57868	1.72257	10.357		cortex-NAFP7W3-4	4751250	4.75125	40	14		2.94659	5.47224				cortex-NAFP10N4-18	7534980	7.53498	26	8		1.06171	2.38886
cortex-NAFP0N2A - 4	1953720	1.95372	4	1		0.511844	1.53553				cortex-NAFP3M2a-2	3179620	3.17962	40	7		2.20152	10.3786				cortex-NAFP7W3-5	5319960	5.31996	56	10		1.87971	8.64668				cortex-NAFP10N4-19	7407340	7.40734	29	11		1.48501	2.43002
cortex-NAFP0N2A - 5	1082940	1.08294	29	2		1.84682	24.9321				cortex-NAFP3M2a-3	3333300	3.3333	34	14		4.20004	6.00006				cortex-NAFP7W3-6	5486520	5.48652	41	10		1.82265	5.65021				cortex-NAFP10N4-20	7186760	7.18676	8	0		0	1.11316
cortex-NAFP0N2A - 6	1252420	1.25242	16	0		0	12.7753				cortex-NAFP3M2a-4	2318910	2.31891	55	1		0.431237	23.2868				cortex-NAFP7W3-7	5033810	5.03381	52	8		1.58925	8.74089				cortex-NAFP10N4-21	6518250	6.51825	15	1		0.153415	2.14782
cortex-NAFP0N2A - 7	1497080	1.49708	23	0		0	15.3632				cortex-NAFP3M2a-5	2221540	2.22154	32	3		1.35041	13.054				cortex-NAFP7W3-8	5177290	5.17729	46	10		1.93151	6.95344				cortex-NAFP10N4-22	6637160	6.63716	25	7		1.05467	2.712
cortex-NAFP0N2A - 8	1548600	1.5486	18	1		0.645745	10.9777				cortex-NAFP3M2a-6	3411550	3.41155	34	4		1.17249	8.79366				cortex-NAFP7W3-9	2920550	2.92055	22	11		3.76641	3.76641				cortex-NAFP10N4-23	7279470	7.27947	28	6		0.824236	3.0222
cortex-NAFP0N2A - 9	1273440	1.27344	36	0		0	28.2699				cortex-NAFP3M2a-7	3090490	3.09049	15	3		0.97072	3.88288				cortex-NAFP7W3-10	4716780	4.71678	23	6		1.27205	3.60415				cortex-NAFP10N4-24	7147180	7.14718	25	6		0.839492	2.65839
cortex-NAFP0N2A - 10	1267760	1.26776	40	3		2.36638	29.1853				cortex-NAFP3M2a-8	3442470	3.44247	32	3		0.871467	8.42418				cortex-NAFP7W3-11	5861610	5.86161	46	16		2.72963	5.11805				cortex-NAFP10N4-25	6373060	6.37306	28	9		1.41219	2.9813
cortex-NAFP0N2A - 11	1331010	1.33101	9	0		0	6.76178				cortex-NAFP3M2a-9	3589030	3.58903	38	1		0.278627	10.3092				cortex-NAFP7W3-12	4958760	4.95876	31	10		2.01663	4.23493				cortex-NAFP10N4-26	6399520	6.39952	16	4		0.625047	1.87514
cortex-NAFP0N2A - 12	1160490	1.16049	6	0		0	5.17023				cortex-NAFP3M2a-10	3268340	3.26834	44	9		2.75369	10.7088				cortex-NAFP7W3-13	5476950	5.47695	26	11		2.00842	2.73875				WT
cortex-NAFP0N2A - 13	893856	0.893856	8	1		1.11875	7.83124				cortex-NAFP3M2a-11	3257450	3.25745	34	4		1.22795	9.20966				cortex-NAFP7W3-14	5340780	5.34078	40	13		2.4341	5.05544				cortex-NAFP10N2-1	6740870	6.74087	12	4		0.593395	1.18679	0.646657	1.98084
cortex-NAFP0N2A - 14	1664010	1.66401	6	0		0	3.60575				cortex-NAFP3M2a-12	3387130	3.38713	45	7		2.06665	11.2189				cortex-NAFP7W3-15	5779850	5.77985	42	8		1.38412	5.88251				cortex-NAFP10N2-2	6208770	6.20877	11	5		0.805312	0.966375
cortex-NAFP0N2A - 15	1574500	1.5745	16	0		0	10.162				cortex-NAFP3M2a-13	3657090	3.65709	52	10		2.73441	11.4845				cortex-NAFP7W3-16	5226050	5.22605	32	5		0.956746	5.16643				cortex-NAFP10N2-3	6211050	6.21105	12	2		0.322007	1.61003
cortex-NAFP0N2A - 16	1703620	1.70362	21	1		0.586985	11.7397				cortex-NAFP3M2a-14	3071790	3.07179	25	1		0.325543	7.81303				cortex-NAFP7W3-17	5473760	5.47376	50	16		2.92304	6.21145				cortex-NAFP10N2-4	6595900	6.5959	11	5		0.758047	0.909656
cortex-NAFP0N2A - 17	1560580	1.56058	27	1		0.640787	16.6605				cortex-NAFP3M2a-15	3030070	3.03007	32	7		2.31018	8.25063				cortex-NAFP7W3-18	5356120	5.35612	28	9		1.68032	3.54734				cortex-NAFP10N2-5	6371240	6.37124	9	2		0.313911	1.09869
cortex-NAFP0N2A - 18	1361800	1.3618	14	0		0	10.2805				cortex-NAFP3M2a-16	3754680	3.75468	57	14		3.72868	11.4524				cortex-NAFP7W3-19	5752890	5.75289	23	6		1.04295	2.95504				cortex-NAFP10N2-6	5841110	5.84111	2	1		0.1712	0.1712
cortex-NAFP0N2A - 19	1363250	1.36325	23	0		0	16.8714				cortex-NAFP3M2a-17	3680120	3.68012	59	10		2.7173	13.3148				cortex-NAFP7W3-20	5086080	5.08608	55	16		3.14584	7.66799				cortex-NAFP10N2-7	5903000	5.903	9	1		0.169405	1.35524
WT											cortex-NAFP3M2a-18	3271870	3.27187	36	4		1.22254	9.78034				cortex-NAFP7W3-21	4808800	4.8088	58	18		3.74314	8.31808				cortex-NAFP10N2-8	6268850	6.26885	10	3		0.478557	1.11663
cortex-NAFP0N3A - 1	1950480	1.95048	7	2		1.02539	2.56347	0.610946	9.41793		cortex-NAFP3M2a-19	2111010	2.11101	25	0		0	11.8427				cortex-NAFP7W3-22	5021980	5.02198	38	7		1.39387	6.17286				cortex-NAFP10N2-9	5325500	5.3255	7	0		0	1.31443
cortex-NAFP0N3A - 2	2103460	2.10346	10	1		0.475407	4.27866				WT											cortex-NAFP7W3-23	4513460	4.51346	45	16		3.54495	6.42523				cortex-NAFP10N2-10	4719750	4.71975	6	1		0.211876	1.05938
cortex-NAFP0N3A - 3	1749230	1.74923	10	0		0	5.7168				cortex-NAFP3M3a-1	2661380	2.66138	61	6	4.08333	2.25447	20.666	1.37794	11.1403		cortex-NAFP7W3-24	3433590	3.43359	28	11		3.20364	4.95109				cortex-NAFP10N2-11	5405140	5.40514	22	2		0.370018	3.70018
cortex-NAFP0N3A - 4	1825840	1.82584	4	0		0	2.19077				cortex-NAFP3M3a-2	2965620	2.96562	52	5		1.68599	15.8483				mutant											cortex-NAFP10N2-12	6294350	6.29435	33	2		0.317745	4.92505
cortex-NAFP0N3A - 5	1994890	1.99489	12	0		0	6.01537				cortex-NAFP3M3a-3	3029130	3.02913	43	4		1.32051	12.875				coretx-NAFP7B3-1	9659890	9.65989	178	55		5.69365	12.7331	3.23768	7.38078		cortex-NAFP10N2-13	6519520	6.51952	25	12		1.84063	1.99401
cortex-NAFP0N3A - 6	1923660	1.92366	12	1		0.519842	5.71827				cortex-NAFP3M3a-4	2888140	2.88814	18	3		1.03873	5.19365				coretx-NAFP7B3-2	10199700	10.1997	123	36		3.52952	8.52966				cortex-NAFP10N2-14	7001950	7.00195	17	3		0.428452	1.99944
cortex-NAFP0N3A - 7	1555840	1.55584	24	3		1.92822	13.4975				cortex-NAFP3M3a-5	2922020	2.92202	26	1		0.342229	8.55573				coretx-NAFP7B3-3	13274600	13.2746	136	46		3.46526	6.77987				cortex-NAFP10N2-15	6635430	6.63543	25	5		0.753531	3.01412
cortex-NAFP0N3A - 8	1792260	1.79226	31	2		1.11591	16.1807				cortex-NAFP3M3a-6	3026980	3.02698	15	0		0	4.95543				coretx-NAFP7B3-4	10784800	10.7848	141	36		3.33803	9.73592				cortex-NAFP10N2-16	7238290	7.23829	21	8		1.10523	1.796
cortex-NAFP0N3A - 9	2130290	2.13029	32	2		0.938839	14.0826				cortex-NAFP3M3a-7	3609100	3.6091	85	9		2.4937	21.0579				coretx-NAFP7B3-5	3038870	3.03887	18	7		2.30349	3.61977				cortex-NAFP10N2-17	6731390	6.73139	19	6		0.891346	1.93125
cortex-NAFP0N3A - 10	1951290	1.95129	28	0		0	14.3495				cortex-NAFP3M3a-8	3240940	3.24094	35	0		0	10.7993				coretx-NAFP7B3-6	13068200	13.0682	106	36		2.75478	5.35651				cortex-NAFP10N2-18	6756160	6.75616	21	3		0.444039	2.66424
cortex-NAFP0N3A - 11	1951590	1.95159	18	0		0	9.22325				cortex-NAFP3M3a-9	3172900	3.1729	22	7		2.20618	4.72754				coretx-NAFP7B3-7	13029800	13.0298	140	46		3.53037	7.21423				cortex-NAFP10N2-19	6843840	6.84384	19	9		1.31505	1.46117
cortex-NAFP0N3A - 12	1860330	1.86033	22	0		0	11.8259				cortex-NAFP3M3a-10	3213340	3.21334	27	2		0.622405	7.78007				coretx-NAFP7B3-8	11305000	11.305	131	40		3.53826	8.04954				cortex-NAFP10N2-20	6905590	6.90559	22	3		0.434431	2.75139
cortex-NAFP0N3A - 13	2089380	2.08938	15	1		0.478611	6.70055				cortex-NAFP3M3a-11	2817730	2.81773	27	2		0.709791	8.87239				coretx-NAFP7B3-9	13375200	13.3752	116	33		2.46725	6.20551				cortex-NAFP10N2-21	6761200	6.7612	22	7		1.03532	2.21854
cortex-NAFP0N3A - 14	2071810	2.07181	14	2		0.965339	5.79204				cortex-NAFP3M3a-12	2815300	2.8153	27	6		2.13121	7.45924				coretx-NAFP7B3-10	11119400	11.1194	151	46		4.13691	9.44296				cortex-NAFP10N2-22	6876910	6.87691	15	8		1.16331	1.0179
cortex-NAFP0N3A - 15	2140170	2.14017	37	3		1.40176	15.8866				cortex-NAFP3M3a-13	2998730	2.99873	38	11		3.66822	9.00381				coretx-NAFP7B3-11	12843100	12.8431	126	32		2.49161	7.31911				cortex-NAFP10N2-23	7166590	7.16659	28	5		0.697682	3.20934
cortex-NAFP0N3A - 16	2160230	2.16023	38	2		0.925827	16.6649				cortex-NAFP3M3a-14	3061640	3.06164	23	5		1.63311	5.8792				coretx-NAFP7B3-12	10605100	10.6051	55	17		1.603	3.58318				cortex-NAFP10N2-24	6982040	6.98204	10	7		1.00257	0.429674
											cortex-NAFP3M3a-15	2667860	2.66786	60	3		1.1245	21.3654				mutant											cortex-NAFP10N2-25	7202080	7.20208	30	4		0.555395	3.61007
											cortex-NAFP3M3a-16	2119300	2.1193	55	3		1.41556	24.5364				coretx-NAFP7B4- 1	10350800	10.3508	106	46		4.4441	5.79665	4.05356	7.04198		cortex-NAFP10N2-26	6612310	6.61231	20	5		0.756165	2.2685
											cortex-NAFP3M3a-17	3050210	3.05021	22	2		0.655693	6.55693				coretx-NAFP7B4- 2	2266260	2.26626	31	9		3.9713	9.70762				cortex-NAFP10N2-27	5991310	5.99131	26	3		0.500725	3.83889
											cortex-NAFP3M3a-18	2728020	2.72802	33	6		2.1994	9.89729				coretx-NAFP7B4- 3	12736800	12.7368	150	63		4.9463	6.8306				cortex-NAFP10N2-28	5960880	5.96088	15	4		0.671042	1.84537
											cortex-NAFP3M3a-19	3066790	3.06679	32	4		1.3043	9.13007				coretx-NAFP7B4- 4	8628290	8.62829	128	40		4.63591	10.199				WT
											cortex-NAFP3M3a-20	2947870	2.94787	21	3		1.01768	6.1061				coretx-NAFP7B4- 5	12814000	12.814	116	45		3.51178	5.54081				cortex-NAFP10N3-1	6285790	6.28579	9	2		0.318178	1.11362	0.623177	2.03497
											cortex-NAFP3M3a-21	2829210	2.82921	38	3		1.06037	12.3709				coretx-NAFP7B4- 6	10264400	10.2644	154	59		5.74802	9.25529				cortex-NAFP10N3-2	6364580	6.36458	9	4		0.628478	0.785598
											cortex-NAFP3M3a-22	2848730	2.84873	46	7		2.45724	13.6903				coretx-NAFP7B4- 7	12647500	12.6475	151	54		4.26962	7.6695				cortex-NAFP10N3-3	6154940	6.15494	17	8		1.29977	1.46224
											cortex-NAFP3M3a-23	3496220	3.49622	51	5		1.43012	13.1571				coretx-NAFP7B4- 8	10311000	10.311	107	36		3.49142	6.88585				cortex-NAFP10N3-4	6272290	6.27229	5	0		0	0.797157
											cortex-NAFP3M3a-24	3341610	3.34161	24	1		0.299257	6.88291				coretx-NAFP7B4- 9	11941500	11.9415	143	45		3.76837	8.20667				cortex-NAFP10N3-5	5348300	5.3483	11	4		0.747901	1.30883
																						coretx-NAFP7B4- 10	11586500	11.5865	118	39		3.36599	6.81828				cortex-NAFP10N3-6	5681670	5.68167	12	3		0.528014	1.58404
																						coretx-NAFP7B4- 11	11969700	11.9697	140	49		4.09367	7.60253				cortex-NAFP10N3-7	7448220	7.44822	9	4		0.537041	0.671301
																						coretx-NAFP7B4- 12	12144300	12.1443	105	50		4.11716	4.52887				cortex-NAFP10N3-8	7125990	7.12599	4	1		0.140331	0.420994
																						coretx-NAFP7B4- 13	11036700	11.0367	114	44		3.9867	6.34248				cortex-NAFP10N3-9	6358000	6.358	4	2		0.314564	0.314564
																						coretx-NAFP7B4- 14	12653800	12.6538	118	49		3.87235	5.45291				cortex-NAFP10N3-10	6445720	6.44572	12	5		0.775709	1.08599
																						coretx-NAFP7B4- 15	10849900	10.8499	80	28		2.58067	4.79267				cortex-NAFP10N3-11	6570150	6.57015	24	5		0.761018	2.89187
																																	cortex-NAFP10N3-12	6789000	6.789	14	5		0.736485	1.32567
																																	cortex-NAFP10N3-13	7443790	7.44379	20	6		0.806041	1.88076
																																	cortex-NAFP10N3-14	7523380	7.52338	18	8		1.06335	1.32919
																																	cortex-NAFP10N3-15	7174690	7.17469	18	4		0.557515	1.9513
																																	cortex-NAFP10N3-16	7276640	7.27664	25	3		0.412278	3.02337
																																	cortex-NAFP10N3-17	7684060	7.68406	24	4		0.520558	2.60279
																																	cortex-NAFP10N3-18	7308600	7.3086	18	2		0.27365	2.1892
																																	cortex-NAFP10N3-19	6581330	6.58133	20	5		0.759725	2.27917
																																	cortex-NAFP10N3-20	7330230	7.33023	13	2		0.272843	1.50064
																																	cortex-NAFP10N3-21	7696390	7.69639	19	5		0.649655	1.81903
																																	cortex-NAFP10N3-22	7538330	7.53833	13	1		0.132655	1.59186
																																	cortex-NAFP10N3-23	7699960	7.69996	16	3		0.389612	1.68832
																																	cortex-NAFP10N3-24	7623220	7.62322	20	6		0.787069	1.83649
																																	cortex-NAFP10N3-25	5864970	5.86497	27	4		0.682015	3.92159
																																	cortex-NAFP10N3-26	6096630	6.09663	31	4		0.6561	4.42868
																																	cortex-NAFP10N3-27	5218350	5.21835	33	6		1.14979	5.17405
																																	cortex-NAFP10N3-28	5165970	5.16597	39	8		1.5486	6.00081
[truncated: 4 more columns]

## Sheet: Figure 5B
	Figure 5B source data. Increased cell death during the endegenous period of programm cell death in the Nkx2.1-derived cIN population in Pcdhg mutant mice.
	Nkx2.1Cre;Ai14;Pcdhg (WT)
	mean # of cells/mm2 per brain
	P0		P3		P7		P10		P15
	CC+, tdTomato +	CC+, tdTomato -	CC+, tdTomato +	CC+, tdTomato -	CC+, tdTomato +	CC+, tdTomato -	CC+, tdTomato +	CC+, tdTomato -	CC+, tdTomato +	CC+, tdTomato -
	0.61975	19.6215	1.37835	8.27411	1.87756	5.68123	0.506911	2.89531	0.363145	4.09363
	0.844986	18.2512	1.72257	10.357	2.04967	5.16683	0.826451	2.60551	0.277122	2.50433
	0.951656	17.4167	1.37794	11.1403	2.53432	5.62	0.646657	1.98084	0.0282379	0.518037
	0.406174	12.0397					0.623177	2.03497
	0.610946	9.41793
	Nkx2.1Cre;Ai14;Pcdhg (mutant)
	mean # of cells/mm2 per brain
	P0		P3		P7		P10		P15
	CC+, tdTomato +	CC+, tdTomato -	CC+, tdTomato +	CC+, tdTomato -	CC+, tdTomato +	CC+, tdTomato -	CC+, tdTomato +	CC+, tdTomato -	CC+, tdTomato +	CC+, tdTomato -
	1.76723	20.634	3.0825	9.4031	5.64041	4.29498	0.449927	2.9842	0.0548934	0.885563
	1.82699	29.8519	5.76521	10.6623	4.62848	5.8675	0.559613	2.35245	0.174564	1.85679
	1.66882	16.9301	3.43238	9.74882	3.7819	4.50627	1.32642	3.12468	0.215523	2.0779
			2.18771	8.37063	3.23768	7.38078
					4.05356	7.04198
	Figure 5B source data. Quantifications of CC3+, tdTomato+ (grey and red colored) and CC3+, tdTomato- (non-Nkx2.1-derived) cells from Nkx2.1Cre;Ai14 mice that carry WT or mutant Pcdhg (P0, P3, P7, P10 or P15).

## Sheet: Figures 3C and 5C raw data
Figure 3C' and Figure 5C. Stereological estimation (shown as densities) of Nkx2.1-derived neurons in visual (V1) and barrel (S1BF) cortex of P30 mice. cIN densities were measured in Nkx2.1Cre;Ai14 mice that carry WT, HET or mutant Pcdhg, and also in Nkx2.1Cre;Ai14;Bax-/- that carry HET or mutant Pcdhg.
		Visual cortex (P30)						Barrel cortex (P30)
	Nkx2.1Cre;Ai14;	1st litter					Nkx2.1Cre;Ai14;	1st litter
		Mouse ID	Estimated population	Measured Volume (µm3)	Cell Density (mm3)			Mouse ID	Estimated population	Measured Volume (µm3)	Cell Density (mm3)
	Pcdhg WT	5	18332.2	1207300000	15184.5		Pcdhg WT	5	95414.7	6590660000	14477.3
		7	31817.2	1712090000	18583.8			7	88786.3	6868190000	12927.2
								2
	Pcdhgfcon3/+	1	24543.2	1697300000	14460.1		Pcdhgfcon3/+	1	82293.5	8599510000	9569.56
		3	42734.5	2154210000	19837.7			3	77764.9	7888840000	9857.58
		8	29683.4	1501920000	19763.6			8	86914.5	7062760000	12306
	Pcdhgfcon3/fcon3	6	13888.6	1559700000	8904.65		Pcdhgfcon3/fcon3	6	54737.7	8995680000	6084.88
		4	24440.6	2651440000	9217.85			4	55554.4	7579490000	7329.57
		2nd litter						2nd litter
	Pcdhg WT	3	45450.9	2779300000	16353.3		Pcdhg WT	3	93833.8	7544740000	12437
		8	45808.3	2507700000	18267.1			8	95166.5	7907650000	12034.7
	Pcdhgfcon3/+	5	45908.4	2871460000	15987.8		Pcdhgfcon3/+	5	115684	8159340000	14178.1
		10	48052.8	2444190000	19660			10	130440	8473760000	15393.4
	Pcdhgfcon3/fcon3	9	20263.4	2537840000	7984.51		Pcdhgfcon3/fcon3	9	67508.4	8237470000	8195.28
		13	25536.8	2462740000	10369.2			13	61492.1	6533460000	9411.87
		additional animals
	Pcdhg WT	G	23754.9	1557320000	15253.7
	Pcdhgfcon3/+	V	23248.1	1639540000	14179.6
	Pcdhgfcon3/fcon3	NA	10351.3	1694690000	6108.08
			Bax null mice						Bax null mice
	Pcdhgfcon3/+;Bax-/-	N1	31388.7	1288550000	24359.7		Pcdhgfcon3/+;Bax-/-	N1	59987.8	2980790000	20124.8
		N3	45000.5	1377360000	32671.5			N3	64786	2247410000	28827
		N4	48665.8	1545420000	31490.4			N4	49228.9	1809320000	27208.5
		N13	38316.7	1847510000	20739.6			N13	38579.4	2189870000	17617.2
	Pcdhgfcon3/fcon3;Bax-/-	6	36089.9	1152600000	31311.8		Pcdhgfcon3/fcon3;Bax-/-	6	46156.8	1660570000	27795.8
		32	46747.6	1986890000	23528			32	33522.6	1666900000	20110.7
		4	33633	1129120000	29786.9			4	52916.4	2621850000	20182.8
		N6	21040	914261000	23013.1			N6	42740.3	2440870000	17510.3

## Sheet: Figures 5C
	Figure 5C. Pcdhg-mediated increased cell death is rescued in Bax-null mice.
	V1 P30					S1BF P30
	Mean density of tdTomato + cells in V1					Mean density of tdTomato + cells in S1BF
	Nkx2.1Cre;Ai14;					Nkx2.1Cre;Ai14;
	Pcdhg WT	Pcdhgfcon3/fcon3	Pcdhgfcon3/+; Bax-/-	Pcdhgfcon3/fcon3; Bax-/-		Pcdhg WT	Pcdhgfcon3/fcon3	Pcdhgfcon3/+; Bax-/-	Pcdhgfcon3/fcon3; Bax-/-
	15184.5	8904.65	24359.7	31311.8		14477.3	6084.88	20124.8	27795.8
	18583.8	9217.85	32671.5	23528		12927.2	7329.57	28827	20110.7
	16353.3	7984.51	31490.4	29786.9		12437	8195.28	27208.5	20182.8
	18267.1	10369.2	20739.6	23013.1		12034.7	9411.87	17617.2	17510.3
	15253.7	6108.08
	Figure 5C. Stereological estimation (represented as density) of Nkx2.1-derived cINs in visual (V1, left table) and barrel (S1BF, right table) cortex of P30 mice. Cell densities were measured in Nkx2.1Cre;Ai14 mice that carry WTor mutant Pcdhg, and also in Nkx2.1Cre;Ai14;Bax-/- that carry HET or mutant Pcdhg.
