# Supplementary material for: Clustered gamma-protocadherins regulate cortical interneuron programmed cell death
Source: eLife. 2020 Jul 7;9:e55374. doi: 10.7554/eLife.55374 (PMC7373431; doi:10.7554/eLife.55374)
Supplement: Figure 6—source data 1. [file elife-55374-fig6-data1.xlsx]

## Sheet: Figure 6C and 6E raw data
	Figure 6C source data. Desity of SST-derived cINs in visual cortex P30 SSTCre;Ai14 mice that carry WT or mutant Pcdh-γ.					Figure 6D source data. Desity of PV-derived cINs in visual cortex P60-100 PVCre;Ai14 mice that carry WT or mutant Pcdh-γ.
	P30 SstCre; Ai14;Pcdhg						PVCre;Ai14;Pcdhg
	Visual cortex (V1)					P60		Visual cortex (V1)
	1st litter					age		Mouse ID	Estimated population	Measured Volume (µm3)	Cell Density (mm3)
	Mouse ID	Estimated population	Measured Volume (µm3)	Cell Density (mm3)		P60	Pcdhg WT	7	66268.6	6496980000	10199.9
Pcdhg WT	SAFN4	11334.7	1323860000	8561.87				9	32477.5	2609630000	12445.2
Pcdhgfcon3/fcon3	SAFN1	9508.91	1754480000	5419.79				10	23161.6	2406590000	9624.23
	2nd litter						Pcdhgfcon3/fcon3	8	26530.7	2810730000	9439.07
Pcdhgfcon3/fcon3	25	7099.95	1378710000	5149.71				12	13705.7	1657680000	8267.98
	28	7312.44	1627060000	4494.27				14	27848.9	2957870000	9415.2
	21	6263.95	933911000	6707.22
Pcdhg WT	31	13532	1323320000	10225.8
	19	12699	1625450000	7812.61
	1	15667.5	2114680000	7408.92
								Mouse ID	Estimated population	Measured Volume (um3)	Cell Density (mm3)
						P100	Pcdhg WT	36	16016.5	2431450000	6587.21
								37	13378.4	1693590000	7899.46
								41	16508.8	1838850000	8977.77
							Pcdhgfcon3/fcon3	42	13848.1	1785060000	7757.81
								43	15119.4	2067030000	7314.55

## Sheet: Figure 6C and 6E 
	Figure 6C and D source data. Loss of Pcdhg function after the period of programmed cell death does not affect the density of cINs.
	V1 P30			V1 P60-100
	SstCre;Ai14;Pcdhg			PVCre;Ai14;Pcdhg
	WT	mutant		WT	mutant
	8561.87	5419.79		10199.9	9439.07
	10225.8	5149.71		12445.2	8267.98
	7812.61	4494.27		9624.23	9415.2
	7408.92	6707.22		6587.21	7757.81
				7899.46	7314.55
				8977.77
	Figure 6C and Dsource data. Desity of SST-derived (left table) and PV-derived (right table) cINs in visual cortex P30 SstCre;Ai14 and PVCre;Ai14 mice that carry WT or mutant Pcdhg.
