# Supplementary material for: Clustered gamma-protocadherins regulate cortical interneuron programmed cell death
Source: eLife. 2020 Jul 7;9:e55374. doi: 10.7554/eLife.55374 (PMC7373431; doi:10.7554/eLife.55374)
Supplement: Figure 7—source data 1. [file elife-55374-fig7-data1.xlsx]

## Sheet: Figure 7B,C,D source data
	Figure 7B-D source data. Pcdha and Pcdhb gene cluster deletion do not lead to changes in cIN density and body weight in P30 mice.
		P30 Nkx2.1Cre;Ai14;
		Visual cortex (V1)
		Mouse ID	Estimated population	Measured Volume (µm3)	Cell Density (mm3)
	Pcdh WT	5	18332.2	1207300000	15184.5		Summary of cIN densities					Summary of weight measurements
		7	31817.2	1712090000	18583.8		V1 P30					Weight in grams at P30			Weight in grams at P30			Weight in grams at P30
		3	45450.9	2779300000	16353.3		Mean density of tdTomato+ cells in V1 by brain					Nkx2.1Cre;Ai14;Pcdha			Nkx2.1Cre;Ai14;Pcdhb			Nkx2.1Cre;Ai14;Pcdhg
		8	45808.3	2507700000	18267.1		Nkx2.1Cre;Ai14					WT	mutant		WT	mutant		WT	TCKO
		G	23754.9	1557320000	15253.7		WT	Pcdh-αacon/acon	Pcdh-βdel/del	Pcdh-γgako/gako
	Pcdhaacon/acon	NA	24499	1588820000	15419.6		15184.5	15419.6	9.84754e+08	15658.3		18.4	22.2		17	15		15.8	15.1
		20	27814	1871380000	14862.8		18583.8	14862.8	1.25036e+09	11886.9		16	17.3		16	16		16	15.2
		2	28447.3	1966630000	14465		16353.3	14465	1.13054e+09	12794.7		18.4	15		15	17		14.5	13
		14	24108.4	1885960000	12783.1		18267.1	12783.1	1.429e+09	8945.5		16	15		15.5	18		14.7	13
							15253.7					18.9	16			16			14.2
	Pcdhbdel/del	4	33902.7	2302330000	14725.4							13.9	16			15
		14	26101.6	1753880000	14882.2							14.3	15.2			17.3
		10	27215.7	1830760000	14865.8							18.6	15.9			15.5
		2	42833	2599460000	16477.7							16.1	15.5			15.9
													17.5
	Pcdhgtako/tako	6	20063.3	1266750000	15838.4								16.8
		35	19774	1287740000	15355.6								14.6
		13	21760	1389340000	15662.1								19
		3	22950	1140140000	20129.1								15.5
							Figure 7B-D source data. Measurements of body weight (columns M-T) and stereological estimation of Nkx2.1-derived cINs (represented as density, columns H-K) in visual cortex of P30 mice. Quantification of cINs and body weight were acquired from Nkx2.1Cre;Ai14 mice that carry the WT or mutant Pcdha gene cluster, the WT or mutant Pcdhb gene cluster and WT or mutant Pcdhgtako/tako.
