# Supplementary material for: Clustered gamma-protocadherins regulate cortical interneuron programmed cell death
Source: eLife. 2020 Jul 7;9:e55374. doi: 10.7554/eLife.55374 (PMC7373431; doi:10.7554/eLife.55374)
Supplement: Figure 8—figure supplement 1—source data 1. [file elife-55374-fig8-figsupp1-data1.xlsx]

## Sheet: 3DAT-718
METADATA 3DAT
All transplants to end of 2019 were processed in microtome at 50um sections, and stained in floating sections
DOT07182017
genotype of transplanted MGE cIN precursors Pcdh WT (Gad6GFP), Pcdh mutant (Nkx2-1Cre;Ai14;fcon3/fcon3
ID/mouse number	sections	DAT	GFP+	TdT+	total	percetage gree	percent red		converted data				summary table
						wt-GFP	FC/FC-tdTomato		wt-GFP	WT-tdTomato			percent
mouse4	1	3	207	188	395	0.524051	0.475949		% to arcsine transformed	% to arcsine transformed			average GFP	average tdT
mouse4	2	3	143	145	288	0.496528	0.503472		0.809458	0.761338	brain 1		0.497282	0.502718	1
mouse4	3	3	35	38	73	0.479452	0.520548		0.781926	0.78887	brain2		0.50399	0.49601	1
mouse4	4	3	247	246	493	0.501014	0.498986		0.764844	0.805952	brain 2		0.42848	0.57152	1
mouse4	5	3	211	238	449	0.469933	0.530067		0.786412	0.784384	average		0.476584	0.523416	1
mouse4	6	3	121	115	236	0.512712	0.487288		0.755313	0.815483			average GFP	average tdT	total GFP+tdTom
									0.798111	0.772685
average			964	970	1934	0.497282	0.502718		0.782678	0.788119
			964	970	1934	0.498449	0.501551
mouse5	1	3	93	84	177	0.525424	0.474576		0.810833	0.759963
mouse5	2	3	234	277	511	0.457926	0.542074		0.743274	0.827522
mouse5	3	3	210	238	448	0.46875	0.53125		0.754128	0.816669
mouse5	4	3	92	115	207	0.444444	0.555556		0.729728	0.841069
mouse5	5	3	219	173	392	0.558673	0.441327		0.844207	0.726589
mouse5	6	3	146	120	266	0.548872	0.451128		0.834349	0.736448
mouse5	7	3	53	43	96	0.552083	0.447917		0.837576	0.73322
mouse5	8	3	167	160	327	0.510703	0.489297		0.796102	0.774694
mouse5	9	3	299	277	576	0.519097	0.480903		0.8045	0.766296
mouse5	10	3	83	106	189	0.439153	0.560847		0.7244	0.846396
mouse5	11	3	303	311	614	0.493485	0.506515		0.778883	0.791913
mouse5	12	3	272	227	499	0.54509	0.45491		0.83055	0.740247
mouse5	13	3	293	282	575	0.509565	0.490435		0.794964	0.775832
mouse5	14	3	293	305	598	0.489967	0.510033		0.775364	0.795432
mouse5	15	3	294	298	592	0.496622	0.503378		0.78202	0.788777
average			3051	3016	6067	0.50399	0.49601		0.789392	0.781404
			3051	3016	6067	0.502884	0.497116
mouse3	1	3	15	29	44	0.340909	0.659091		0.623493	0.947304
mouse3	2	3	17	16	33	0.515152	0.484848		0.800552	0.770244
mouse3	3	3	31	24	55	0.563636	0.436364		0.849208	0.721589
mouse3	4	3	37	57	94	0.393617	0.606383		0.678196	0.892601
mouse3	5	3	38	29	67	0.567164	0.432836		0.852766	0.71803
mouse3	6	3	29	43	72	0.402778	0.597222		0.687553	0.883244
mouse3	7	3	31	40	71	0.43662	0.56338		0.721847	0.848949
mouse3	8	3	10	43	53	0.188679	0.811321		0.449341	1.12146
mouse3	9	3	30	37	67	0.447761	0.552239		0.733064	0.837732
average			238	318	556	0.42848	0.57152		0.710669	0.860128											0	0	0	0	0	0	0	0
			238	318	556	0.428058	0.571942

## Sheet: 13DAT-718
METADATA 13DAT
All transplants to end of 2019 were processed in microtome at 50um sections, and stained in floating sections
DOT07182017
genotype of transplanted MGE cIN precursors Pcdh WT (Gad6GFP), Pcdh mutant (Nkx2-1Cre;Ai14;fcon3/fcon3									converted data
									wt-GFP	WT-tdTomato
									% to arcsine transformed	% to arcsine transformed			summary table
ID/mouse number	sections	DAT	GFP+	TdT+	total	percetage gree	percent red						percent
13DAT#5a-wtGFP-Nkx2.1-Cre-Ai14-FCFC-from7.18	1	13	67	14	81	0.82716	0.17284		1.14204	0.428756			average GFP	average tdT
	2	13	30	3	33	0.909091	0.0909091		1.26452	0.306277	brain 1
	3	13	35	7	42	0.833333	0.166667		1.15026	0.420534	brain2		0.867197	0.132803	1
	4	13	73	11	84	0.869048	0.130952		1.20052	0.370277	brain 2		0.860351	0.139649	1
	5	13	68	10	78	0.871795	0.128205		1.20461	0.366187	average		0.863774	0.136226	1
	6	13	87	14	101	0.861386	0.138614		1.1893	0.381495			average GFP	average tdT	total GFP+tdTom
	7	13	82	19	101	0.811881	0.188119		1.12217	0.448625
	8	13	51	8	59	0.864407	0.135593		1.19369	0.377104
	9	13	85	13	98	0.867347	0.132653		1.19801	0.37279
	10	13	22	1	23	0.956522	0.0434783		1.36074	0.210056
average			600	100	700	0.867197	0.132803		1.20259	0.36821
			600	100	700	0.857143	0.142857
13DAT#7a1-wtGFP-Nkx2.1-Cre-Ai14-FCFC-from7.18	1	13	68	10	78	0.871795	0.128205		1.20461	0.366187
13DAT#7a2-wtGFP-Nkx2.1-Cre-Ai14-FCFC-from7.18	2	13	76	10	86	0.883721	0.116279		1.22282	0.347977
13DAT#7a2-wtGFP-Nkx2.1-Cre-Ai14-FCFC-from7.18	3	13	62	9	71	0.873239	0.126761		1.20678	0.364021
13DAT#7a3-wtGFP-Nkx2.1-Cre-Ai14-FCFC-from7.18	4	13	107	17	124	0.862903	0.137097		1.1915	0.379295
mouse3	5	13	103	18	121	0.85124	0.14876		1.17484	0.395961
mouse3	6	13	145	32	177	0.819209	0.180791		1.13162	0.439178
average			561	96	657	0.860351	0.139649		1.18869	0.382103
			561	96	657	0.853881	0.146119

## Sheet: Figure 8B - Fig Suppl 1
	Figure 8 - Figure Supplement 1. The number of transplated MGE-derived cIN precursor cells carrying WT or mutant Pcdhg is reduced during the period of programmed cell death
	3 DAT		6 DAT		13 DAT		21 DAT
	# of transplant-derived cells per brain
	GFP	tdTomato	GFP	tdTomato	GFP	tdTomato	GFP	tdTomato
	8644	7058	9716	6726	8048	1395	520	49
	9821	8136	8552	5511	1134	137	3825	166
	9993	7598	22765	14698	1183	176	306	26
	319	216	1491	924	9759	949	674	94
					5597	398
	Figure 8 - Figure Supplement 1. Quantifications of all transplanted MGE-derived cIN cells (labeled with GFP or tdTomato) in cortex of recipient mice at 3, 6, 13 and 21 days after transplantation (DAT). MGE precursors cells were derived from Gad1-GFP (GFP+,WT Pcdhg) and Nkx2.1Cre;Ai14;Pcdhfcon3/fcon3 (tdTomato+,mutant Pcdhg) embryos at E13.5.
