# Supplementary material for: Clustered gamma-protocadherins regulate cortical interneuron programmed cell death
Source: eLife. 2020 Jul 7;9:e55374. doi: 10.7554/eLife.55374 (PMC7373431; doi:10.7554/eLife.55374)
Supplement: Figure 8—source data 1. [file elife-55374-fig8-data1.xlsx]

## Sheet: Figure 8B raw data
Figure 8B. Quantifications of transplanted (GFP and tdTomato labeled that carry WT Pcdhg) cells in cortex of recipient mice at 3, 6, 13 and 21 days after transplantation (DAT). MGE precursors cells were derived from Gad1-GFP (WT Pcdhg) and Nkx2.1Cre;Ai14 (WT Pcdhg) E13.5 embryos, and equal proportions of GFP and tdTomato labeled cells were mixed before being co-transplanted into P2-6 black 6 wild…
3 DAT								7 DAT								13 DAT								21 DAT
slice brain secion ID/mouse number	DAT	GFP+	tomato+	total	% green	%t red		slice brain secion ID/mouse number	DAT	GFP+	tomato+	total	% green	%t red		slice brain secion ID/mouse number	DAT	GFP+	tomato+	total	% green	%t red		slice brain secion ID/mouse number	DAT	GFP+	tomato+	total	% green	%t red
cortex-DOT101518DAT3N7A_001	3	98	87	185	0.52973	0.47027		cortex-DOT101518DAT7N3A_001	7	106	158	264	0.401515	0.598485		cortex-DOT101518DAT7N4A_001	13	8	14	22	0.363636	0.636364		cortex-DOT101518DAT7N6A_001	21	33	38	71	0.464789	0.535211
cortex-DOT101518DAT3N7A_002	3	209	197	406	0.514778	0.485222		cortex-DOT101518DAT7N3A_002	7	183	165	348	0.525862	0.474138		cortex-DOT101518DAT7N4A_002	13	2	2	4	0.5	0.5		cortex-DOT101518DAT7N6A_002	21	13	16	29	0.448276	0.551724
cortex-DOT101518DAT3N7A_003	3	5	8	13	0.384615	0.615385		cortex-DOT101518DAT7N3A_003	7	583	536	1119	0.521001	0.478999		cortex-DOT101518DAT7N4A_003	13	3	2	5	0.6	0.4		cortex-DOT101518DAT7N6A_003	21	18	16	34	0.529412	0.470588
cortex-DOT101518DAT3N7A_004	3	38	51	89	0.426966	0.573034		cortex-DOT101518DAT7N3A_004	7	274	269	543	0.504604	0.495396		cortex-DOT101518DAT7N4A_004	13	102	98	200	0.51	0.49		cortex-DOT101518DAT7N6A_004	21	7	20	27	0.259259	0.740741
cortex-DOT101518DAT3N7A_005	3	92	94	186	0.494624	0.505376		cortex-DOT101518DAT7N3A_005	7	17	23	40	0.425	0.575		cortex-DOT101518DAT7N4A_005	13	31	35	66	0.469697	0.530303		cortex-DOT101518DAT7N6A_005	21	26	32	58	0.448276	0.551724
cortex-DOT101518DAT3N7A_006	3	150	177	327	0.458716	0.541284		cortex-DOT101518DAT7N3A_006	7	25	45	70	0.357143	0.642857		cortex-DOT101518DAT7N4A_006	13	16	14	30	0.533333	0.466667		cortex-DOT101518DAT7N6A_006	21	32	32	64	0.5	0.5
cortex-DOT101518DAT3N7A_007	3	101	98	199	0.507538	0.492462		cortex-DOT101518DAT7N3A_007	7	359	353	712	0.504213	0.495787		cortex-DOT101518DAT7N4A_007	13	196	169	365	0.536986	0.463014		cortex-DOT101518DAT7N6A_007	21	26	36	62	0.419355	0.580645
cortex-DOT101518DAT3N7A_008	3	127	130	257	0.494163	0.505837		cortex-DOT101518DAT7N3A_008	7	194	229	423	0.458629	0.541371		cortex-DOT101518DAT7N4A_008	13	155	159	314	0.493631	0.506369		cortex-DOT101518DAT7N6A_008	21	8	6	14	0.571429	0.428571
cortex-DOT101518DAT3N7A_009	3	143	176	319	0.448276	0.551724		cortex-DOT101518DAT7N3A_009	7	41	49	90	0.455556	0.544444		cortex-DOT101518DAT7N4A_009	13	178	162	340	0.523529	0.476471		cortex-DOT101518DAT7N6A_009	21	27	17	44	0.613636	0.386364
cortex-DOT101518DAT3N7A_010	3	300	303	603	0.497512			cortex-DOT101518DAT7N3A_010	7	635	584	1219	0.520919	0.479081		cortex-DOT101518DAT7N4A_010	13	16	16	32	0.5	0.5		cortex-DOT101518DAT7N6A_010	21	7	8	15	0.466667	0.533333
total # of cells counted		1263	1321	2584				total # of cells counted		2417	2411	4828				total # of cells counted		707	671	1378				total # of cells counted		197	221	418
mean fraction (% ) by brain slice					0.475692	0.526733		mean fraction (% ) by brain slice					0.467444	0.532556		mean fraction (% ) by brain slice					0.503081	0.496919		mean fraction (% ) by brain slice					0.47211	0.52789
cortex-DOT101518DAT3N11A_001	3	5	1	6	0.833333	0.166667		cortex-DOT101518DAT7N8A_001	7	149	127	276	0.539855	0.460145		cortex-DOT101518DAT7N10A_001	13	16	14	30	0.533333	0.466667		cortex-DOT101518DAT7N9B_001	21	104	121	225	0.462222	0.537778
cortex-DOT101518DAT3N11A_002	3	370	342	712	0.519663	0.480337		cortex-DOT101518DAT7N8A_002	7	283	241	524	0.540076	0.459924		cortex-DOT101518DAT7N10A_002	13	47	56	103	0.456311	0.543689		cortex-DOT101518DAT7N9B_002	21	65	79	144	0.451389	0.548611
cortex-DOT101518DAT3N11A_003	3	80	96	176	0.454545	0.545455		cortex-DOT101518DAT7N8A_003	7	230	205	435	0.528736	0.471264		cortex-DOT101518DAT7N10A_003	13	108	119	227	0.475771	0.524229		cortex-DOT101518DAT7N9B_003	21	95	102	197	0.482234	0.517766
cortex-DOT101518DAT3N11A_004	3	303	312	615	0.492683	0.507317		cortex-DOT101518DAT7N8A_004	7	110	109	219	0.502283	0.497717		cortex-DOT101518DAT7N10A_004	13	45	54	99	0.454545	0.545455		cortex-DOT101518DAT7N9B_004	21	67	76	143	0.468531	0.531469
cortex-DOT101518DAT3N11A_005	3	29	25	54	0.537037	0.462963		cortex-DOT101518DAT7N8A_005	7	206	193	399	0.516291	0.483709		cortex-DOT101518DAT7N10A_005	13	90	99	189	0.47619	0.52381		cortex-DOT101518DAT7N9B_005	21	99	113	212	0.466981	0.533019
cortex-DOT101518DAT3N11A_006	3	56	58	114	0.491228	0.508772		cortex-DOT101518DAT7N8A_006	7	378	304	682	0.554252	0.445748		cortex-DOT101518DAT7N10A_006	13	52	64	116	0.448276	0.551724		cortex-DOT101518DAT7N9B_006	21	127	140	267	0.475655	0.524345
cortex-DOT101518DAT3N11A_007	3	36	41	77	0.467532	0.532468		cortex-DOT101518DAT7N8A_007	7	303	240	543	0.558011	0.441989		cortex-DOT101518DAT7N10A_007	13	123	159	282	0.43617	0.56383		cortex-DOT101518DAT7N9B_007	21	42	52	94	0.446809	0.553191
cortex-DOT101518DAT3N11A_008	3	115	116	231	0.497835	0.502165		cortex-DOT101518DAT7N8A_008	7	113	100	213	0.530516	0.469484		cortex-DOT101518DAT7N10A_008	13	51	42	93	0.548387	0.451613		cortex-DOT101518DAT7N9B_008	21	50	52	102	0.490196	0.509804
cortex-DOT101518DAT3N11A_009	3	360	326	686	0.524781	0.475219		cortex-DOT101518DAT7N8A_009	7	274	244	518	0.528958	0.471042		cortex-DOT101518DAT7N10A_009	13	54	73	127	0.425197	0.574803		cortex-DOT101518DAT7N9B_009	21	64	44	108	0.592593	0.407407
cortex-DOT101518DAT3N11A_010	3	25	27	52	0.480769	0.519231		cortex-DOT101518DAT7N8A_010	7	164	152	316	0.518987	0.481013		cortex-DOT101518DAT7N10A_010	13	29	34	63	0.460317	0.539683		cortex-DOT101518DAT7N9B_010	21	147	161	308	0.477273	0.522727
total # of cells counted		1379	1344	2723				total # of cells counted		2210	1915	4125				total # of cells counted		615	714	1329				total # of cells counted		860	940	1800
mean fraction (% ) by brain slice					0.529941	0.470059		mean fraction (% ) by brain slice					0.531797	0.468203		mean fraction (% ) by brain slice					0.47145	0.52855		mean fraction (% ) by brain slice					0.481388	0.518612
cortex-DOT10122217DAT3N10_001	3	185	205	390	0.474359	0.525641		cortex-DOT10122217DAT6N14_001	6	104	71	175	0.594286	0.405714		cortex-DOT101518DAT7N17A_001	13	149	157	306	0.486928	0.513072		cortex-DOT101518DAT7N12B_001	21	106	122	228	0.464912	0.535088
cortex-DOT10122217DAT3N10_002	3	80	58	138	0.57971	0.42029		cortex-DOT10122217DAT6N14_002	6	142	85	227	0.625551	0.374449		cortex-DOT101518DAT7N17A_002	13	143	158	301	0.475083	0.524917		cortex-DOT101518DAT7N12B_002	21	38	37	75	0.506667	0.493333
cortex-DOT10122217DAT3N10_003	3	171	136	307	0.557003	0.442997		cortex-DOT10122217DAT6N14_003	6	35	27	62	0.564516	0.435484		cortex-DOT101518DAT7N17A_003	13	7	9	16	0.4375	0.5625		cortex-DOT101518DAT7N12B_003	21	22	28	50	0.44	0.56
cortex-DOT10122217DAT3N10_004	3	55	53	108	0.509259	0.490741		cortex-DOT10122217DAT6N14_004	6	38	31	69	0.550725	0.449275		cortex-DOT101518DAT7N17A_004	13	32	31	63	0.507937	0.492063		cortex-DOT101518DAT7N12B_004	21	124	140	264	0.469697	0.530303
cortex-DOT10122217DAT3N10_005	3	121	110	231	0.52381	0.47619		cortex-DOT10122217DAT6N14_005	6	29	18	47	0.617021	0.382979		cortex-DOT101518DAT7N17A_005	13	211	184	395	0.534177	0.465823		cortex-DOT101518DAT7N12B_005	21	21	20	41	0.512195	0.487805
cortex-DOT10122217DAT3N10_006	3	135	135	270	0.5	0.5		cortex-DOT10122217DAT6N14_006	6	77	67	144	0.534722	0.465278		cortex-DOT101518DAT7N17A_006	13	89	84	173	0.514451	0.485549		cortex-DOT101518DAT7N12B_006	21	58	59	117	0.495726	0.504274
cortex-DOT10122217DAT3N10_007	3	296	334	630	0.469841	0.530159		cortex-DOT10122217DAT6N14_007	6	47	36	83	0.566265	0.433735		cortex-DOT101518DAT7N17A_007	13	31	47	78	0.397436	0.602564		cortex-DOT101518DAT7N12B_007	21	119	155	274	0.434307	0.565693
cortex-DOT10122217DAT3N10_008	3	197	214	411	0.479319	0.520681		cortex-DOT10122217DAT6N14_008	6	66	42	108	0.611111	0.388889		cortex-DOT101518DAT7N17A_008	13	200	191	391	0.511509	0.488491		cortex-DOT101518DAT7N12B_008	21	46	33	79	0.582278	0.417722
cortex-DOT10122217DAT3N10_009	3	73	56	129	0.565891	0.434109		cortex-DOT10122217DAT6N14_009	6	40	32	72	0.555556	0.444444		cortex-DOT101518DAT7N17A_009	13	107	98	205	0.521951	0.478049		cortex-DOT101518DAT7N12B_009	21	30	30	60	0.5	0.5
cortex-DOT10122217DAT3N10_010	3	149	130	279	0.53405	0.46595		cortex-DOT10122217DAT6N14_010	6	29	24	53	0.54717	0.45283		cortex-DOT101518DAT7N17A_010	13	119	110	229	0.519651	0.480349		cortex-DOT101518DAT7N12B_010	21	8	4	12	0.666667	0.333333
total # of cells counted		1462	1431	2893				total # of cells counted		607	433	1040				total # of cells counted		1088	1069	2157				total # of cells counted		572	628	1200
mean fraction (% ) by brain slice					0.519324	0.480676		mean fraction (% ) by brain slice					0.576692	0.423308		mean fraction (% ) by brain slice					0.490662	0.509338		mean fraction (% ) by brain slice					0.507245	0.492755
cortex-DOT10122217DAT3N15_001	3	250	289	539	0.463822	0.536178		cortex-DOT10122217DAT6N17-a_001	6	64	45	109	0.587156	0.412844		cortex-DOT10122217DAT6N18_001	13	47	32	79	0.594937	0.405063		cortex-DOT10122217DAT6N5_001	21	56	57	113	0.495575	0.504425
cortex-DOT10122217DAT3N15_002	3	141	129	270	0.522222	0.477778		cortex-DOT10122217DAT6N17-a_002	6	91	110	201	0.452736	0.547264		cortex-DOT10122217DAT6N18_002	13	41	36	77	0.532468	0.467532		cortex-DOT10122217DAT6N5_002	21	35	18	53	0.660377	0.339623
cortex-DOT10122217DAT3N15_003	3	156	176	332	0.46988	0.53012		cortex-DOT10122217DAT6N17-a_003	6	33	16	49	0.673469	0.326531		cortex-DOT10122217DAT6N18_003	13	25	18	43	0.581395	0.418605		cortex-DOT10122217DAT6N5_003	21	11	14	25	0.44	0.56
cortex-DOT10122217DAT3N15_004	3	168	168	336	0.5	0.5		cortex-DOT10122217DAT6N17-a_004	6	29	35	64	0.453125	0.546875		cortex-DOT10122217DAT6N18_004	13	38	37	75	0.506667	0.493333		cortex-DOT10122217DAT6N5_004	21	31	29	60	0.516667	0.483333
cortex-DOT10122217DAT3N15_005	3	86	86	172	0.5	0.5		cortex-DOT10122217DAT6N17-a_005	6	28	21	49	0.571429	0.428571		cortex-DOT10122217DAT6N18_005	13	44	32	76	0.578947	0.421053		cortex-DOT10122217DAT6N5_005	21	15	40	55	0.272727	0.727273
cortex-DOT10122217DAT3N15_006	3	158	182	340	0.464706	0.535294		cortex-DOT10122217DAT6N17-a_006	6	227	240	467	0.486081	0.513919		cortex-DOT10122217DAT6N18_006	13	94	59	153	0.614379	0.385621		cortex-DOT10122217DAT6N5_006	21	25	20	45	0.555556	0.444444
cortex-DOT10122217DAT3N15_007	3	49	55	104	0.471154	0.528846		cortex-DOT10122217DAT6N17-a_007	6	46	43	89	0.516854	0.483146		cortex-DOT10122217DAT6N18_007	13	26	21	47	0.553191	0.446809		cortex-DOT10122217DAT6N5_007	21	26	15	41	0.634146	0.365854
cortex-DOT10122217DAT3N15_008	3	112	111	223	0.502242	0.497758		cortex-DOT10122217DAT6N17-a_008	6	66	79	145	0.455172	0.544828		cortex-DOT10122217DAT6N18_008	13	39	23	62	0.629032	0.370968		cortex-DOT10122217DAT6N5_008	21	13	11	24	0.541667	0.458333
cortex-DOT10122217DAT3N15_009	3	168	167	335	0.501493	0.498507		cortex-DOT10122217DAT6N17-a_009	6	60	63	123	0.487805	0.512195		cortex-DOT10122217DAT6N18_009	13	85	65	150	0.566667	0.433333		cortex-DOT10122217DAT6N5_009	21	11	11	22	0.5	0.5
cortex-DOT10122217DAT3N15_010	3	229	236	465	0.492473	0.507527		total # of cells counted		644	652	1296				cortex-DOT10122217DAT6N18_010	13	75	69	144	0.520833	0.479167		cortex-DOT10122217DAT6N5_010	21	35	30	65	0.538462	0.461538
total # of cells counted		1517	1599	3116				mean fraction (% ) by brain slice					0.520425	0.479575		total # of cells counted		514	392	906				total # of cells counted		258	245	503
mean fraction (% ) by brain slice					0.488799	0.511201										mean fraction (% ) by brain slice					0.567852	0.432148		mean fraction (% ) by brain slice					0.515518	0.484482
cortex-DOT10122217DAT3N17_001	3	236	221	457	0.516411	0.483589
cortex-DOT10122217DAT3N17_002	3	133	127	260	0.511538	0.488462
cortex-DOT10122217DAT3N17_003	3	42	60	102	0.411765	0.588235
cortex-DOT10122217DAT3N17_004	3	14	24	38	0.368421	0.631579
cortex-DOT10122217DAT3N17_005	3	159	162	321	0.495327	0.504673
cortex-DOT10122217DAT3N17_006	3	223	194	417	0.534772	0.465228
cortex-DOT10122217DAT3N17_007	3	109	90	199	0.547739	0.452261
cortex-DOT10122217DAT3N17_008	3	53	53	106	0.5	0.5
cortex-DOT10122217DAT3N17_009	3	208	172	380	0.547368	0.452632
cortex-DOT10122217DAT3N17_010	3	130	164	294	0.442177	0.557823
total # of cells counted		1307	1267	2574
mean fraction (% ) by brain slice					0.487552	0.512448
cortex-DOT10122217DAT3N6_001	3	45	32	77	0.584416	0.415584
cortex-DOT10122217DAT3N6_002	3	193	158	351	0.549858	0.450142
cortex-DOT10122217DAT3N6_003	3	86	67	153	0.562092	0.437908
cortex-DOT10122217DAT3N6_004	3	266	206	472	0.563559	0.436441
cortex-DOT10122217DAT3N6_005	3	142	113	255	0.556863	0.443137
cortex-DOT10122217DAT3N6_006	3	27	31	58	0.465517	0.534483
cortex-DOT10122217DAT3N6_007	3	108	84	192	0.5625	0.4375
cortex-DOT10122217DAT3N6_008	3	42	21	63	0.666667	0.333333
cortex-DOT10122217DAT3N6_009	3	256	211	467	0.54818	0.45182
cortex-DOT10122217DAT3N6_010	3	181	178	359	0.504178	0.495822
total # of cells counted		1346	1101	2447
mean fraction (% ) by brain slice					0.556383	0.443617

## Sheet: Figure 8B
		Figure 8B source data. Genetic background or fluorophore type do not affect survival of transplanted cIN precursors.
			Gad1-GFP (WT Pcdhg)							Nkx2.1Cre;Ai14 (WT Pcdhg)
	Survival fraction (%) by brain	DAT	GFP							tdTomato
		3	0.476	0.53	0.519	0.489	0.488	0.556		0.524	0.47	0.481	0.511	0.512	0.444
		7	0.467	0.532	0.577	0.52				0.533	0.468	0.423	0.48
		13	0.503	0.471	0.491	0.558				0.497	0.529	0.509	0.442
		21	0.472	0.481	0.507	0.534				0.528	0.519	0.493	0.466
		Figure 8B source data. Quantifications of co-transplanted cIN precursor cells labeled with GFP or tdTomato but WT for Pcdhg, in cortex of recipient mice at 3, 6, 13 and 21 days after transplantation (DAT). MGE precursors cells were derived from Gad1-GFP (WT Pcdhg) and Nkx2.1Cre;Ai14 (WT Pcdhg) E13.5 embryos, and equal proportions of GFP and tdTomato labeled cells were mixed before being co-transp…

## Sheet: Figure 8B′ raw data
Figure 8B'. Detailed quantifications of all transplanted (GFP and tdTomato labeled) cells in cortex of recipient mice at 3, 6, 13 and 21 days after transplantation (DAT). MGE precursors cells were derived from Gad1-GFP (WT Pcdhg) and Nkx2.1Cre;Ai14;Pcdhgfcon3/fcon3 (mutant Pcdhg) E13.5 embryos, and equal proportions of GFP and tdTomato labeled cells were mixed before being co-transplanted into P2…
3 DAT								6 DAT								13 DAT								21 DAT
seciont ID/mouse number	DAT	GFP+	tomato+	total	% green	%t red		slice brain secion ID/mouse number	DAT	GFP+	tomato+	total	% green	%t red		slice brain secion ID/mouse number	DAT	GFP+	tomato+	total	% green	%t red		slice brain secion ID/mouse number	DAT	GFP+	tomato+	total	% green	%t red		Figure 8B'
cortex-DOT819173DATN11a_001	3	341	315	656	0.519817	0.480183		cortex-DOT81917DAT6N3b_001	6	47	44	91	0.516484	0.483516		cortex-DOT81917DAT13N2a_001	13	96	19	115	0.834783	0.165217		cortex-DOT81917DAT21N4a_001	21	28	5	33	0.848485	0.151515		3 DAT		6 DAT		13 DAT		21 DAT
cortex-DOT819173DATN11_002	3	413	305	718	0.575209	0.424791		cortex-DOT81917DAT6N3b_002	6	106	91	197	0.538071	0.461929		cortex-DOT81917DAT13N2a_002	13	335	67	402	0.833333	0.166667		cortex-DOT81917DAT21N4a_002	21	59	5	64	0.921875	0.078125		mean fraction (%) by brain
cortex-DOT819173DATN11_003	3	371	317	688	0.539244	0.460756		cortex-DOT81917DAT6N3b_003	6	33	18	51	0.647059	0.352941		cortex-DOT81917DAT13N2a_003	13	271	45	316	0.857595	0.142405		cortex-DOT81917DAT21N4a_003	21	37	6	43	0.860465	0.139535		GFP	tdTomato	GFP	tdTomato	GFP	tdTomato	GFP	tdTomato
cortex-DOT819173DATN11_004	3	321	282	603	0.532338	0.467662		cortex-DOT81917DAT6N3b_004	6	531	359	890	0.596629	0.403371		cortex-DOT81917DAT13N2a_004	13	215	41	256	0.839844	0.160156		cortex-DOT81917DAT21N4a_004	21	27	1	28	0.964286	0.0357143		0.550269	0.449731	0.582122	0.417878	0.859399	0.140601	0.917118	0.0828823
cortex-DOT819173DATN11_005	3	329	279	608	0.541118	0.458882		cortex-DOT81917DAT6N3b_005	6	472	345	817	0.577723	0.422277		cortex-DOT81917DAT13N2a_005	13	201	37	238	0.844538	0.155462		cortex-DOT81917DAT21N4a_005	21	37	3	40	0.925	0.075		0.55404	0.44596	0.600382	0.399618	0.892118	0.108549	0.963674	0.0363256
cortex-DOT819173DATN11_006	3	302	259	561	0.538324	0.461676		cortex-DOT81917DAT6N3b_006	6	316	216	532	0.593985	0.406015		cortex-DOT81917DAT13N2b_001	13	153	16	169	0.905325	0.0946746		cortex-DOT81917DAT21N4b_001	21	35	3	38	0.921053	0.0789474		0.572424	0.427576	0.613441	0.386559	0.869667	0.130333	0.919622	0.0803784
cortex-DOT819173DATN11_007	3	228	195	423	0.539007	0.460993		cortex-DOT81917DAT6N3b_007	6	256	186	442	0.579186	0.420814		cortex-DOT81917DAT13N2b_002	13	326	56	382	0.853403	0.146597		cortex-DOT81917DAT21N4b_002	21	34	3	37	0.918919	0.0810811		0.583141	0.416859	0.625682	0.374318	0.915625	0.0843755	0.879661	0.120339
cortex-DOT819173DATN11_008	3	381	307	688	0.553779	0.446221		cortex-DOT81917DAT6N3b_008	6	291	192	483	0.602484	0.397516		cortex-DOT81917DAT13N2b_003	13	95	8	103	0.92233	0.0776699		cortex-DOT81917DAT21N4c_001	21	67	7	74	0.905405	0.0945946						0.933916	0.0660836		738
cortex-DOT819173DATN11_009	3	160	146	306	0.522876	0.477124		cortex-DOT81917DAT6N3b_009	6	294	181	475	0.618947	0.381053		cortex-DOT81917DAT13N2b_004	13	178	33	211	0.843602	0.156398		cortex-DOT81917DAT21N4c_002	21	49	2	51	0.960784	0.0392157
cortex-DOT819173DATN11_010	3	408	303	711	0.57384	0.42616		cortex-DOT81917DAT6N3b_010	6	437	288	725	0.602759	0.397241		cortex-DOT81917DAT13N2b_005	13	133	21	154	0.863636	0.136364		cortex-DOT81917DAT21N4c_003	21	21	0	21	1	0
cortex-DOT819173DATN11_011	3	334	274	608	0.549342	0.450658		cortex-DOT81917DAT6N3b_011	6	392	267	659	0.594841	0.405159		cortex-DOT81917DAT13N2b_006	13	301	61	362	0.831492	0.168508		cortex-DOT81917DAT21N4c_004	21	56	5	61	0.918033	0.0819672
cortex-DOT819173DATN11_012	3	233	198	431	0.540603	0.459397		cortex-DOT81917DAT6N3b_012	6	319	213	532	0.599624	0.400376		cortex-DOT81917DAT13N2b_007	13	77	9	86	0.895349	0.104651		cortex-DOT81917DAT21N4d_001	21	28	3	31	0.903226	0.0967742
cortex-DOT819173DATN11_013	3	316	266	582	0.542955	0.457045		cortex-DOT81917DAT6N3a_001	6	419	331	750	0.558667	0.441333		cortex-DOT81917DAT13N2b_008	13	314	59	373	0.841823	0.158177		cortex-DOT81917DAT21N4d_002	21	42	6	48	0.875	0.125		Figure 8B - Figure supplement 1
cortex-DOT819173DATN11_014	3	299	262	561	0.532977	0.467023		cortex-DOT81917DAT6N3a_002	6	261	201	462	0.564935	0.435065		cortex-DOT81917DAT13N2b_009	13	207	32	239	0.866109	0.133891		total # of cells per brain		520	49	569				3 DAT		6 DAT		13 DAT		21 DAT
cortex-DOT819173DATN11_015	3	281	200	481	0.5842	0.4158		cortex-DOT81917DAT6N3a_003	6	105	71	176	0.596591	0.403409		cortex-DOT81917DAT13N2b_010	13	192	56	248	0.774194	0.225806		mean fraction (% ) by brain slice					0.917118	0.0828823		# of transplant-derived cells per brain
cortex-DOT819173DATN11b_001	3	381	294	675	0.564444	0.435556		cortex-DOT81917DAT6N3a_004	6	100	75	175	0.571429	0.428571		cortex-DOT81917DAT13N2b_011	13	105	17	122	0.860656	0.139344										GFP	tdTomato	GFP	tdTomato	GFP	tdTomato	GFP	tdTomato
cortex-DOT819173DATN11b_002	3	163	131	294	0.554422	0.445578		cortex-DOT81917DAT6N3a_005	6	370	238	608	0.608553	0.391447		cortex-DOT81917DAT13N2b_012	13	217	41	258	0.841085	0.158915		cortex-DOT82217DAT21N3a_001	21	121	3	124	0.975806	0.0241935		8644	7058	9716	6726	8048	1395	520	49
cortex-DOT819173DATN11b_003	3	75	67	142	0.528169	0.471831		cortex-DOT81917DAT6N3a_006	6	193	153	346	0.557803	0.442197		cortex-DOT81917DAT13N2c_001	13	96	17	113	0.849558	0.150442		cortex-DOT82217DAT21N3a_002	21	111	1	112	0.991071	0.00892857		9821	8136	8552	5511	1134	137	3825	166
cortex-DOT819173DATN11b_004	3	105	82	187	0.561497	0.438503		cortex-DOT81917DAT6N3a_007	6	77	59	136	0.566176	0.433824		cortex-DOT81917DAT13N2c_002	13	115	15	130	0.884615	0.115385		cortex-DOT82217DAT21N3a_003	21	125	3	128	0.976562	0.0234375		9993	7598	22765	14698	1183	176	306	26
cortex-DOT819173DATN11b_005	3	80	60	140	0.571429	0.428571		cortex-DOT81917DAT6N3a_008	6	88	71	159	0.553459	0.446541		cortex-DOT81917DAT13N2c_003	13	80	12	92	0.869565	0.130435		cortex-DOT82217DAT21N3a_004	21	120	5	125	0.96	0.04		319	216	1491	924	9759	949	674	94
cortex-DOT819173DATN11b_006	3	185	162	347	0.533141	0.466859		cortex-DOT81917DAT6N3a_009	6	369	247	616	0.599026	0.400974		cortex-DOT81917DAT13N2c_004	13	207	29	236	0.877119	0.122881		cortex-DOT82217DAT21N3b_001	21	100	1	101	0.990099	0.00990099						5597	398
cortex-DOT819173DATN11b_007	3	80	74	154	0.519481	0.480519		cortex-DOT81917DAT6N3a_010	6	143	99	242	0.590909	0.409091		cortex-DOT81917DAT13N2c_005	13	162	24	186	0.870968	0.129032		cortex-DOT82217DAT21N3b_002	21	124	2	126	0.984127	0.015873
cortex-DOT819173DATN11b_008	3	308	258	566	0.54417	0.45583		cortex-DOT81917DAT6N3a_011	6	107	88	195	0.548718	0.451282		cortex-DOT81917DAT13N2c_006	13	47	5	52	0.903846	0.0961538		cortex-DOT82217DAT21N3b_003	21	45	0	45	1	0
cortex-DOT819173DATN11b_009	3	330	228	558	0.591398	0.408602		cortex-DOT81917DAT6N3a_012	6	239	142	381	0.627297	0.372703		cortex-DOT81917DAT13N2c_007	13	125	17	142	0.880282	0.119718		cortex-DOT82217DAT21N3b_004	21	66	0	66	1	0
cortex-DOT819173DATN11b_001	3	304	257	561	0.541889	0.458111		cortex-DOT81917DAT6N3a_013	6	598	375	973	0.614594	0.385406		cortex-DOT81917DAT13N2c_008	13	181	30	211	0.85782	0.14218		cortex-DOT82217DAT21N3b_005	21	64	1	65	0.984615	0.0153846
cortex-DOT819173DATN11b_002	3	318	267	585	0.54359	0.45641		cortex-DOT81917DAT6N3a_014	6	296	196	492	0.601626	0.398374		cortex-DOT81917DAT13N2c_009	13	187	30	217	0.861751	0.138249		cortex-DOT82217DAT21N3c_001	21	128	9	137	0.934307	0.0656934
cortex-DOT819173DATN11b_003	3	378	285	663	0.570136	0.429864		cortex-DOT81917DAT6N3c_001	6	360	242	602	0.598007	0.401993		cortex-DOT81917DAT13N2c_010	13	298	47	345	0.863768	0.136232		cortex-DOT82217DAT21N3c_002	21	170	9	179	0.949721	0.0502793
cortex-DOT819173DATN11b_005	3	227	186	413	0.549637	0.450363		cortex-DOT81917DAT6N3c_002	6	291	212	503	0.578529	0.421471		cortex-DOT81917DAT13N2d_001	13	257	38	295	0.871186	0.128814		cortex-DOT82217DAT21N3c_003	21	92	3	95	0.968421	0.0315789
cortex-DOT819173DATN11b_006	3	102	74	176	0.579545	0.420455		cortex-DOT81917DAT6N3c_003	6	421	259	680	0.619118	0.380882		cortex-DOT81917DAT13N2d_002	13	261	61	322	0.810559	0.189441		cortex-DOT82217DAT21N3c_004	21	107	2	109	0.981651	0.0183486
cortex-DOT819173DATN11b_007	3	131	100	231	0.5671	0.4329		cortex-DOT81917DAT6N3c_004	6	310	203	513	0.604288	0.395712		cortex-DOT81917DAT13N2d_003	13	275	57	332	0.828313	0.171687		cortex-DOT82217DAT21N3c_005	21	205	8	213	0.962441	0.0375587
cortex-DOT819173DATN11b_008	3	33	22	55	0.6	0.4		cortex-DOT81917DAT6N3c_005	6	478	319	797	0.599749	0.400251		cortex-DOT81917DAT13N2d_004	13	311	50	361	0.861496	0.138504		cortex-DOT82217DAT21N3c_006	21	108	10	118	0.915254	0.0847458
cortex-DOT819173DATN11b_009	3	161	133	294	0.547619	0.452381		cortex-DOT81917DAT6N3i_001	6	23	19	42	0.547619	0.452381		cortex-DOT81917DAT13N2d_005	13	280	60	340	0.823529	0.176471		cortex-DOT82217DAT21N3c_007	21	202	21	223	0.90583	0.0941704
cortex-DOT819173DATN11b_010	3	64	53	117	0.547009	0.452991		cortex-DOT81917DAT6N3i_002	6	67	60	127	0.527559	0.472441		cortex-DOT81917DAT13N2d_006	13	320	61	381	0.839895	0.160105		cortex-DOT82217DAT21N3c_008	21	140	7	147	0.952381	0.047619
cortex-DOT819173DATN11b_011	3	51	42	93	0.548387	0.451613		cortex-DOT81917DAT6N3i_003	6	60	48	108	0.555556	0.444444		cortex-DOT81917DAT13N2d_007	13	543	89	632	0.859177	0.140823		cortex-DOT82217DAT21N3d_001	21	219	7	226	0.969027	0.0309735
cortex-DOT819173DATN11b_013	3	67	65	132	0.507576	0.492424		cortex-DOT81917DAT6N3i_004	6	125	111	236	0.529661	0.470339		cortex-DOT81917DAT13N2d_008	13	282	40	322	0.875776	0.124224		cortex-DOT82217DAT21N3d_002	21	122	9	131	0.931298	0.0687023
cortex-DOT819173DATN11b_014	3	113	89	202	0.559406	0.440594		cortex-DOT81917DAT6N3i_005	6	98	59	157	0.624204	0.375796		cortex-DOT81917DAT13N2d_009	13	213	39	252	0.845238	0.154762		cortex-DOT82217DAT21N3d_003	21	218	16	234	0.931624	0.0683761
cortex-DOT819173DATN11b_015	3	111	85	196	0.566327	0.433673		cortex-DOT81917DAT6N3i_006	6	44	32	76	0.578947	0.421053		cortex-DOT81917DAT13N2d_010	13	208	35	243	0.855967	0.144033		cortex-DOT82217DAT21N3d_004	21	176	7	183	0.961749	0.0382514
cortex-DOT819173DATN11f_001	3	88	69	157	0.56051	0.43949		cortex-DOT81917DAT6N3i_007	6	157	95	252	0.623016	0.376984		cortex-DOT81917DAT13N2d_011	13	61	4	65	0.938462	0.0615385		cortex-DOT82217DAT21N3d_005	21	278	11	289	0.961938	0.0380623
cortex-DOT819173DATN11f_002	3	72	67	139	0.517986	0.482014		cortex-DOT81917DAT6N3i_008	6	264	199	463	0.570194	0.429806		cortex-DOT81917DAT13N2d_012	13	123	17	140	0.878571	0.121429		cortex-DOT82217DAT21N3d_006	21	116	3	119	0.97479	0.0252101
total # of cells per brain		8644	7058	15702				cortex-DOT81917DAT6N3i_009	6	31	30	61	0.508197	0.491803		total # of cells per brain		8048	1395	9443				cortex-DOT82217DAT21N3d_007	21	167	5	172	0.97093	0.0290698
mean fraction (% ) by brain slice					0.550269	0.449731		cortex-DOT81917DAT6N3i_010	6	53	43	96	0.552083	0.447917		mean fraction (% ) by brain slice					0.859399	0.140601		cortex-DOT82217DAT21N3d_008	21	200	12	212	0.943396	0.0566038
								cortex-DOT81917DAT6N3i_011	6	75	49	124	0.604839	0.395161										cortex-DOT82217DAT21N3d_009	21	73	0	73	1	0
cortex-DOT82217DAT3N1a_001	3	549	480	1029	0.533528	0.466472		total # of cells per brain		9716	6726	16442				cortex-DOT81917DAT13N7a_001	13	41	6	47	0.87234	0.12766		cortex-DOT82217DAT21N3d_010	21	59	2	61	0.967213	0.0327869
cortex-DOT82217DAT3N1a_002	3	334	271	605	0.552066	0.447934		mean fraction (% ) by brain slice					0.582122	0.417878		cortex-DOT81917DAT13N7a_002	13	42	10	52	0.807692	0.192308		cortex-DOT82217DAT21N3d_011	21	42	2	44	0.954545	0.0454545
cortex-DOT82217DAT3N1a_003	3	359	282	641	0.560062	0.439938										cortex-DOT81917DAT13N7a_003	13	48	6	54	0.888889	0.111111		cortex-DOT82217DAT21N3e_001	21	127	7	134	0.947761	0.0522388
cortex-DOT82217DAT3N1a_004	3	214	141	355	0.602817	0.397183		cortex-DOT81917DAT6N6a_001	6	178	109	287	0.620209	0.379791		cortex-DOT81917DAT13N7a_004	13	26	4	30	0.866667	0.133333		total # of cells per brain		3825	166	3991
cortex-DOT82217DAT3N1a_005	3	247	186	433	0.570439	0.429561		cortex-DOT81917DAT6N6a_002	6	148	105	253	0.58498	0.41502		cortex-DOT81917DAT13N7a_005	13	36	3	39	0.923077	0.0769231		mean fraction (% ) by brain slice					0.963674	0.0363256
cortex-DOT82217DAT3N1a_006	3	341	290	631	0.540412	0.459588		cortex-DOT81917DAT6N6a_003	6	212	157	369	0.574526	0.425474		cortex-DOT81917DAT13N7a_006	13	23	3	26	0.884615	0.115385
cortex-DOT82217DAT3N1a_007	3	502	442	944	0.53178	0.46822		cortex-DOT81917DAT6N6a_004	6	300	184	484	0.619835	0.380165		cortex-DOT81917DAT13N7a_007	13	19	1	27	0.703704	0.296296		cortex-DOT82217DAT21N22a_001	21	42	6	48	0.875	0.125
cortex-DOT82217DAT3N1a_008	3	557	478	1035	0.538164	0.461836		cortex-DOT81917DAT6N6a_005	6	191	140	331	0.577039	0.422961		cortex-DOT81917DAT13N7a_008	13	41	8	44	0.931818	0.0681818		cortex-DOT82217DAT21N22a_002	21	66	5	71	0.929577	0.0704225
cortex-DOT82217DAT3N1a_009	3	523	459	982	0.532587	0.467413		cortex-DOT81917DAT6N6a_006	6	258	173	431	0.598608	0.401392		cortex-DOT81917DAT13N7a_009	13	23	3	26	0.884615	0.115385		cortex-DOT82217DAT21N22b_001	21	25	0	25	1	0
cortex-DOT82217DAT3N1a_010	3	44	29	73	0.60274	0.39726		cortex-DOT81917DAT6N6a_007	6	295	175	470	0.62766	0.37234		cortex-DOT81917DAT13N7a_010	13	33	3	36	0.916667	0.166667		cortex-DOT82217DAT21N22b_002	21	26	1	27	0.962963	0.037037
cortex-DOT82217DAT3N1a_011	3	43	49	92	0.467391	0.532609		cortex-DOT81917DAT6N6a_008	6	262	207	469	0.558635	0.441365		cortex-DOT81917DAT13N7a_011	13	44	6	50	0.88	0.06		cortex-DOT82217DAT21N22b_003	21	17	4	21	0.809524	0.190476
cortex-DOT82217DAT3N1a_012	3	443	372	815	0.543558	0.456442		cortex-DOT81917DAT6N6a_009	6	261	188	449	0.581292	0.418708		cortex-DOT81917DAT13N7a_012	13	22	3	25	0.88	0.12		cortex-DOT82217DAT21N22b_004	21	38	3	41	0.926829	0.0731707
cortex-DOT82217DAT3N1a_013	3	545	507	1052	0.518061	0.481939		cortex-DOT81917DAT6N6a_010	6	174	126	300	0.58	0.42		cortex-DOT81917DAT13N7b_001	13	49	2	51	0.960784	0.0392157		cortex-DOT82217DAT21N22b_005	21	27	2	29	0.931034	0.0689655
cortex-DOT82217DAT3N1a_014	3	275	225	500	0.55	0.45		cortex-DOT81917DAT6N6a_011	6	270	175	445	0.606742	0.393258		cortex-DOT81917DAT13N7b_002	13	75	10	85	0.882353	0.117647		cortex-DOT82217DAT21N22b_006	21	26	4	30	0.866667	0.133333
cortex-DOT82217DAT3N1a_015	3	197	158	355	0.55493	0.44507		cortex-DOT81917DAT6N6a_012	6	218	119	337	0.646884	0.353116		cortex-DOT81917DAT13N7b_003	13	59	5	64	0.921875	0.078125		cortex-DOT82217DAT21N22c_001	21	39	1	40	0.975	0.025
cortex-DOT82217DAT3N1b_001	3	111	98	209	0.5311	0.4689		cortex-DOT81917DAT6N6a_013	6	295	207	502	0.587649	0.412351		cortex-DOT81917DAT13N7b_004	13	24	0	24	1	0		total # of cells per brain		306	26	332
cortex-DOT82217DAT3N1b_002	3	152	115	267	0.569288	0.430712		cortex-DOT81917DAT6N6a_014	6	278	171	449	0.619154	0.380846		cortex-DOT81917DAT13N7b_005	13	31	5	36	0.861111	0.138889		mean fraction (% ) by brain slice					0.919622	0.0803784
cortex-DOT82217DAT3N1b_003	3	119	68	187	0.636364	0.363636		cortex-DOT81917DAT6N6a_015	6	287	201	488	0.588115	0.411885		cortex-DOT81917DAT13N7b_006	13	44	7	51	0.862745	0.137255
cortex-DOT82217DAT3N1b_004	3	258	197	455	0.567033	0.432967		cortex-DOT81917DAT6N6b_001	6	200	133	333	0.600601	0.399399		cortex-DOT81917DAT13N7c_001	13	66	10	76	0.868421	0.131579		cortex-DOT82217DAT21N9b_001	21	21	0	21	1	0
cortex-DOT82217DAT3N1b_005	3	460	394	854	0.538642	0.461358		cortex-DOT81917DAT6N6b_002	6	113	71	184	0.61413	0.38587		cortex-DOT81917DAT13N7c_002	13	40	4	44	0.909091	0.0909091		cortex-DOT82217DAT21N9b_002	21	22	2	24	0.916667	0.0833333
cortex-DOT82217DAT3N1b_006	3	413	371	784	0.526786	0.473214		cortex-DOT81917DAT6N6b_003	6	60	38	98	0.612245	0.387755		cortex-DOT81917DAT13N7c_003	13	32	3	35	0.914286	0.0857143		cortex-DOT82217DAT21N9b_003	21	51	4	55	0.927273	0.0727273
cortex-DOT82217DAT3N1b_007	3	362	314	676	0.535503	0.464497		cortex-DOT81917DAT6N6b_004	6	130	108	238	0.546218	0.453782		cortex-DOT81917DAT13N7c_004	13	39	3	42	0.928571	0.0714286		cortex-DOT82217DAT21N9c_001	21	33	3	36	0.916667	0.0833333
cortex-DOT82217DAT3N1b_008	3	76	59	135	0.562963	0.437037		cortex-DOT81917DAT6N6b_005	6	56	46	102	0.54902	0.45098		cortex-DOT81917DAT13N7d_001	13	29	2	31	0.935484	0.0645161		cortex-DOT82217DAT21N9c_002	21	63	7	70	0.9	0.1
cortex-DOT82217DAT3N1b_009	3	323	238	561	0.575758	0.424242		cortex-DOT81917DAT6N6b_006	6	209	136	345	0.605797	0.394203		cortex-DOT81917DAT13N7d_002	13	28	3	31	0.903226	0.0967742		cortex-DOT82217DAT21N9c_003	21	56	6	62	0.903226	0.0967742
cortex-DOT82217DAT3N1b_010	3	263	224	487	0.540041	0.459959		cortex-DOT81917DAT6N6b_007	6	84	63	147	0.571429	0.428571		cortex-DOT81917DAT13N7d_003	13	59	6	65	0.907692	0.0923077		cortex-DOT82217DAT21N9c_004	21	37	9	46	0.804348	0.195652
cortex-DOT82217DAT3N1b_011	3	299	261	560	0.533929	0.466071		cortex-DOT81917DAT6N6b_008	6	126	86	212	0.59434	0.40566		cortex-DOT81917DAT13N7d_004	13	21	4	25	0.84	0.16		cortex-DOT82217DAT21N9d_001	21	47	7	54	0.87037	0.12963
cortex-DOT82217DAT3N1b_012	3	331	263	594	0.557239	0.442761		cortex-DOT81917DAT6N6b_009	6	419	83	502	0.834661	0.165339		cortex-DOT81917DAT13N7d_005	13	24	5	29	0.827586	0.172414		cortex-DOT82217DAT21N9d_002	21	34	7	41	0.829268	0.170732
cortex-DOT82217DAT3N1b_013	3	354	270	624	0.567308	0.432692		cortex-DOT81917DAT6N6b_010	6	170	119	289	0.588235	0.411765		cortex-DOT81917DAT13N7d_006	13	25	1	26	0.961538	0.0384615		cortex-DOT82217DAT21N9d_003	21	27	4	31	0.870968	0.129032
cortex-DOT82217DAT3N1b_014	3	289	260	549	0.526412	0.473588		cortex-DOT81917DAT6N6b_011	6	227	159	386	0.588083	0.411917		cortex-DOT81917DAT13N7d_007	13	12	3	15	0.8	0.2		cortex-DOT82217DAT21N9d_004	21	65	8	73	0.890411	0.109589
cortex-DOT82217DAT3N1b_015	3	397	319	716	0.554469	0.445531		cortex-DOT81917DAT6N6b_012	6	236	173	409	0.577017	0.422983		cortex-DOT81917DAT13N7d_008	13	14	3	17	0.823529	0.176471		cortex-DOT82217DAT21N9d_005	21	45	5	50	0.9	0.1
cortex-DOT82217DAT3N1c_001	3	19	14	33	0.575758	0.424242		cortex-DOT81917DAT6N6b_013	6	228	164	392	0.581633	0.418367		cortex-DOT81917DAT13N7d_009	13	14	1	15	0.933333	0.0666667		cortex-DOT82217DAT21N9d_006	21	35	8	43	0.813953	0.186047
cortex-DOT82217DAT3N1c_002	3	293	211	504	0.581349	0.418651		cortex-DOT81917DAT6N6b_014	6	253	173	426	0.593897	0.406103		cortex-DOT81917DAT13N7d_010	13	10	1	11	0.909091	0.0909091		cortex-DOT82217DAT21N9d_007	21	34	7	41	0.829268	0.170732
cortex-DOT82217DAT3N1c_003	3	79	47	126	0.626984	0.373016		cortex-DOT81917DAT6N6c_001	6	201	140	341	0.589443	0.410557		cortex-DOT81917DAT13N7d_011	13	12	0	12	1	0		cortex-DOT82217DAT21N9d_008	21	32	6	38	0.842105	0.157895
cortex-DOT82217DAT3N1c_004	3	50	44	94	0.531915	0.468085		cortex-DOT81917DAT6N6c_002	6	117	71	188	0.62234	0.37766		cortex-DOT81917DAT13N7d_012	13	14	0	14	1	0		cortex-DOT82217DAT21N9d_009	21	33	4	37	0.891892	0.108108
total # of cells per brain	total	9821	8136	17957				cortex-DOT81917DAT6N6c_003	6	215	136	351	0.612536	0.387464		cortex-DOT81917DAT13N7d_013	13	15	3	18	0.833333	0.166667		cortex-DOT82217DAT21N9d_010	21	39	7	46	0.847826	0.152174
mean fraction (% ) by brain slice					0.55404	0.44596		cortex-DOT81917DAT6N6c_004	6	235	151	386	0.608808	0.391192		total # of cells per brain		1134	137	1273				total # of cells per brain		674	94	768
								cortex-DOT81917DAT6N6c_005	6	120	72	192	0.625	0.375		mean fraction (% ) by brain slice					0.892118	0.108549		mean fraction (% ) by brain slice					0.879661	0.120339
cortex-DOT82217DAT3N5a_001	3	353	252	605	0.583471	0.416529		cortex-DOT81917DAT6N6c_006	6	75	41	116	0.646552	0.353448
cortex-DOT82217DAT3N5a_002	3	225	200	425	0.529412	0.470588		cortex-DOT81917DAT6N6c_007	6	201	140	341	0.589443	0.410557		cortex-DOT81917DAT13N10a_001	13	58	12	70	0.828571	0.171429
cortex-DOT82217DAT3N5a_003	3	374	300	674	0.554896	0.445104		cortex-DOT81917DAT6N6c_008	6	117	71	188	0.62234	0.37766		cortex-DOT81917DAT13N10a_002	13	71	11	82	0.865854	0.134146
cortex-DOT82217DAT3N5a_004	3	278	216	494	0.562753	0.437247		cortex-DOT81917DAT6N6c_009	6	215	136	351	0.612536	0.387464		cortex-DOT81917DAT13N10a_003	13	52	6	58	0.896552	0.103448
cortex-DOT82217DAT3N5a_005	3	167	132	299	0.558528	0.441472		cortex-DOT81917DAT6N6c_010	6	365	151	516	0.707364	0.292636		cortex-DOT81917DAT13N10a_004	13	60	7	67	0.895522	0.104478
cortex-DOT82217DAT3N5a_006	3	434	397	831	0.522262	0.477738		cortex-DOT81917DAT6N6c_011	6	120	72	192	0.625	0.375		cortex-DOT81917DAT13N10a_005	13	94	16	110	0.854545	0.145455
cortex-DOT82217DAT3N5a_007	3	269	207	476	0.565126	0.434874		cortex-DOT81917DAT6N6c_012	6	75	41	116	0.646552	0.353448		cortex-DOT81917DAT13N10a_006	13	74	9	83	0.891566	0.108434
cortex-DOT82217DAT3N5a_008	3	474	404	878	0.539863	0.460137		cortex-DOT81917DAT6N6c_013	6	24	26	50	0.48	0.52		cortex-DOT81917DAT13N10a_007	13	112	15	127	0.88189	0.11811
cortex-DOT82217DAT3N5a_009	3	321	290	611	0.525368	0.474632		cortex-DOT81917DAT6N6g_001	6	131	109	240	0.545833	0.454167		cortex-DOT81917DAT13N10a_008	13	65	14	79	0.822785	0.177215
cortex-DOT82217DAT3N5a_010	3	646	520	1166	0.554031	0.445969		cortex-DOT81917DAT6N6g_002	6	60	61	121	0.495868	0.504132		cortex-DOT81917DAT13N10a_009	13	88	13	101	0.871287	0.128713
cortex-DOT82217DAT3N5a_011	3	546	422	968	0.56405	0.43595		cortex-DOT81917DAT6N6g_003	6	78	44	122	0.639344	0.360656		cortex-DOT81917DAT13N10a_010	13	61	6	67	0.910448	0.0895522
cortex-DOT82217DAT3N5a_012	3	565	439	1004	0.562749	0.437251		cortex-DOT81917DAT6N6g_004	6	65	60	125	0.52	0.48		cortex-DOT81917DAT13N10g_001	13	120	15	135	0.888889	0.111111
cortex-DOT82217DAT3N5c_001	3	448	345	793	0.564943	0.435057		total # of cells per brain		8552	5511	14063				cortex-DOT81917DAT13N10g_002	13	96	20	116	0.827586	0.172414
cortex-DOT82217DAT3N5c_002	3	102	47	149	0.684564	0.315436		mean fraction (% ) by brain slice					0.600382	0.399618		cortex-DOT81917DAT13N10g_003	13	75	14	89	0.842697	0.157303
cortex-DOT82217DAT3N5c_003	3	139	97	236	0.588983	0.411017										cortex-DOT81917DAT13N10g_004	13	157	18	175	0.897143	0.102857
cortex-DOT82217DAT3N5c_004	3	149	97	246	0.605691	0.394309		cortex-DOT82217DAT6N6A_001	6	107	66	173	0.618497	0.381503		total # of cells per brain		1183	176	1359
cortex-DOT82217DAT3N5g_001	3	36	41	77	0.467532	0.532468		cortex-DOT82217DAT6N6A_002	6	506	365	871	0.580941	0.419059		mean fraction (% ) by brain slice					0.869667	0.130333
cortex-DOT82217DAT3N5g_002	3	327	234	561	0.582888	0.417112		cortex-DOT82217DAT6N6A_003	6	245	175	420	0.583333	0.416667
cortex-DOT82217DAT3N5g_003	3	513	370	883	0.580974	0.419026		cortex-DOT82217DAT6N6A_004	6	136	101	237	0.57384	0.42616		cortex-DOT82217DAT13N2c_001	13	266	18	284	0.93662	0.0633803
cortex-DOT82217DAT3N5g_004	3	514	330	844	0.609005	0.390995		cortex-DOT82217DAT6N6A_005	6	439	245	684	0.641813	0.358187		cortex-DOT82217DAT13N2c_002	13	288	30	318	0.90566	0.0943396
cortex-DOT82217DAT3N5g_005	3	624	485	1109	0.562669	0.437331		cortex-DOT82217DAT6N6A_006	6	237	146	383	0.618799	0.381201		cortex-DOT82217DAT13N2c_003	13	321	33	354	0.90678	0.0932203
cortex-DOT82217DAT3N5g_006	3	173	119	292	0.592466	0.407534		cortex-DOT82217DAT6N6A_007	6	141	84	225	0.626667	0.373333		cortex-DOT82217DAT13N2c_004	13	201	37	238	0.844538	0.155462
cortex-DOT82217DAT3N5g_007	3	243	172	415	0.585542	0.414458		cortex-DOT82217DAT6N6A_008	6	103	63	166	0.620482	0.379518		cortex-DOT82217DAT13N2c_005	13	87	6	93	0.935484	0.0645161
cortex-DOT82217DAT3N5g_008	3	165	104	269	0.613383	0.386617		cortex-DOT82217DAT6N6A_009	6	148	86	234	0.632479	0.367521		cortex-DOT82217DAT13N2c_006	13	72	8	80	0.9	0.1
cortex-DOT82217DAT3N5g_009	3	415	321	736	0.563859	0.436141		cortex-DOT82217DAT6N6A_010	6	45	21	66	0.681818	0.318182		cortex-DOT82217DAT13N2c_007	13	99	6	105	0.942857	0.0571429
cortex-DOT82217DAT3N5g_010	3	266	170	436	0.610092	0.389908		cortex-DOT82217DAT6N6A_011	6	79	39	118	0.669492	0.330508		cortex-DOT82217DAT13N2c_008	13	344	29	373	0.922252	0.077748
cortex-DOT82217DAT3N5g_011	3	489	357	846	0.578014	0.421986		cortex-DOT82217DAT6N6A_012	6	283	173	456	0.620614	0.379386		cortex-DOT82217DAT13N2c_009	13	337	39	376	0.896277	0.103723
cortex-DOT82217DAT3N5g_012	3	281	223	504	0.55754	0.44246		cortex-DOT82217DAT6N6A_013	6	241	143	384	0.627604	0.372396		cortex-DOT82217DAT13N2c_010	13	302	38	340	0.888235	0.111765
cortex-DOT82217DAT3N5g_013	3	357	242	599	0.595993	0.404007		cortex-DOT82217DAT6N6d_001	6	272	170	442	0.615385	0.384615		cortex-DOT82217DAT13N2b_001	13	129	5	134	0.962687	0.0373134
cortex-DOT82217DAT3N5g_014	3	100	65	165	0.606061	0.393939		cortex-DOT82217DAT6N6d_002	6	424	265	689	0.615385	0.384615		cortex-DOT82217DAT13N2b_002	13	128	11	139	0.920863	0.0791367
total # of cells per brain		9993	7598	17591				cortex-DOT82217DAT6N6d_004	6	816	524	1340	0.608955	0.391045		cortex-DOT82217DAT13N2b_003	13	199	20	219	0.908676	0.0913242
mean fraction (% ) by brain slice					0.572424	0.427576		cortex-DOT82217DAT6N6d_005	6	684	450	1134	0.603175	0.396825		cortex-DOT82217DAT13N2b_004	13	232	33	265	0.875472	0.124528
								cortex-DOT82217DAT6N6d_006	6	842	519	1361	0.618663	0.381337		cortex-DOT82217DAT13N2b_005	13	174	12	186	0.935484	0.0645161
cortex-DOT82217DAT3N26b_001	3	52	31	83	0.626506	0.373494		cortex-DOT82217DAT6N6d_007	6	178	105	283	0.628975	0.371025		cortex-DOT82217DAT13N2b_006	13	246	18	264	0.931818	0.0681818
cortex-DOT82217DAT3N26b_002	3	36	29	65	0.553846	0.446154		cortex-DOT82217DAT6N6d_008	6	902	589	1491	0.604963	0.395037		cortex-DOT82217DAT13N2b_007	13	334	38	372	0.897849	0.102151
cortex-DOT82217DAT3N26b_003	3	27	21	48	0.5625	0.4375		cortex-DOT82217DAT6N6c_001	6	744	469	1213	0.613355	0.386645		cortex-DOT82217DAT13N2b_008	13	234	24	258	0.906977	0.0930233
cortex-DOT82217DAT3N26b_004	3	79	41	120	0.658333	0.341667		cortex-DOT82217DAT6N6c_002	6	833	537	1370	0.608029	0.391971		cortex-DOT82217DAT13N2b_009	13	402	40	442	0.909502	0.0904977
cortex-DOT82217DAT3N26b_005	3	45	42	87	0.517241	0.482759		cortex-DOT82217DAT6N6c_004	6	917	623	1540	0.595455	0.404545		cortex-DOT82217DAT13N2b_010	13	161	10	171	0.94152	0.0584795
cortex-DOT82217DAT3N26b_006	3	80	52	132	0.606061	0.393939		cortex-DOT82217DAT6N6c_005	6	694	478	1172	0.59215	0.40785		cortex-DOT82217DAT13N2b_011	13	307	28	335	0.916418	0.0835821
total # of cells per brain		319	216	535				cortex-DOT82217DAT6N6c_006	6	1030	694	1724	0.597448	0.402552		cortex-DOT82217DAT13N2b_012	13	158	9	167	0.946108	0.0538922
mean fraction (% ) by brain slice					0.583141	0.416859		cortex-DOT82217DAT6N6c_007	6	672	418	1090	0.616514	0.383486		cortex-DOT82217DAT13N2b_013	13	166	15	181	0.917127	0.0828729
								cortex-DOT82217DAT6N6c_008	6	864	502	1366	0.632504	0.367496		cortex-DOT82217DAT13N2a_001	13	241	17	258	0.934109	0.0658915
								cortex-DOT82217DAT6N6c_009	6	823	514	1337	0.615557	0.384443		cortex-DOT82217DAT13N2a_002	13	167	6	173	0.965318	0.0346821
								cortex-DOT82217DAT6N6c_010	6	410	288	698	0.587393	0.412607		cortex-DOT82217DAT13N2a_003	13	322	32	354	0.909605	0.0903955
								cortex-DOT82217DAT6N6c_011	6	806	518	1324	0.608761	0.391239		cortex-DOT82217DAT13N2a_004	13	371	40	411	0.902676	0.0973236
								cortex-DOT82217DAT6N6c_012	6	816	480	1296	0.62963	0.37037		cortex-DOT82217DAT13N2a_005	13	256	23	279	0.917563	0.0824373
								cortex-DOT82217DAT6N6c_013	6	860	514	1374	0.62591	0.37409		cortex-DOT82217DAT13N2a_006	13	271	30	301	0.900332	0.0996678
								cortex-DOT82217DAT6N6c_014	6	515	341	856	0.601636	0.398364		cortex-DOT82217DAT13N2a_007	13	391	33	424	0.92217	0.0778302
								cortex-DOT82217DAT6N6c_015	6	686	459	1145	0.599127	0.400873		cortex-DOT82217DAT13N2a_008	13	399	38	437	0.913043	0.0869565
								cortex-DOT82217DAT6N6b_001	6	273	189	462	0.590909	0.409091		cortex-DOT82217DAT13N2a_009	13	239	30	269	0.888476	0.111524
								cortex-DOT82217DAT6N6b_002	6	571	382	953	0.599161	0.400839		cortex-DOT82217DAT13N2a_010	13	161	8	169	0.952663	0.0473373
								cortex-DOT82217DAT6N6b_003	6	529	333	862	0.613689	0.386311		cortex-DOT82217DAT13N2a_011	13	515	65	580	0.887931	0.112069
								cortex-DOT82217DAT6N6b_004	6	438	300	738	0.593496	0.406504		cortex-DOT82217DAT13N2a_012	13	409	44	453	0.90287	0.0971302
								cortex-DOT82217DAT6N6b_005	6	574	409	983	0.583927	0.416073		cortex-DOT82217DAT13N2a_013	13	308	28	336	0.916667	0.0833333
								cortex-DOT82217DAT6N6b_006	6	376	267	643	0.584759	0.415241		cortex-DOT82217DAT13N2a_014	13	232	22	254	0.913386	0.0866142
								cortex-DOT82217DAT6N6b_007	6	240	172	412	0.582524	0.417476		cortex-DOT82217DAT13N2a_015	13	290	26	316	0.917722	0.0822785
								cortex-DOT82217DAT6N6b_008	6	815	526	1341	0.607755	0.392245		total # of cells per brain		9759	949	10708
								cortex-DOT82217DAT6N6b_009	6	296	218	514	0.575875	0.424125		mean fraction (% ) by brain slice					0.915625	0.0843755
								cortex-DOT82217DAT6N6b_010	6	119	84	203	0.586207	0.413793
								cortex-DOT82217DAT6N6b_011	6	34	16	50	0.68	0.32		cortex-DOT82217DAT13N224d_001	13	201	16	217	0.926267	0.0737327
								cortex-DOT82217DAT6N6b_012	6	51	29	80	0.6375	0.3625		cortex-DOT82217DAT13N224d_002	13	112	11	123	0.910569	0.0894309
								cortex-DOT82217DAT6N6b_013	6	446	295	741	0.601889	0.398111		cortex-DOT82217DAT13N224d_003	13	118	10	128	0.921875	0.078125
								cortex-DOT82217DAT6N6b_014	6	185	127	312	0.592949	0.407051		cortex-DOT82217DAT13N224d_004	13	141	13	154	0.915584	0.0844156
								cortex-DOT82217DAT6N6b_015	6	148	103	251	0.589641	0.410359		cortex-DOT82217DAT13N224d_005	13	146	6	152	0.960526	0.0394737
								cortex-DOT82217DAT6N6b_016	6	75	33	108	0.694444	0.305556		cortex-DOT82217DAT13N224d_006	13	127	10	137	0.927007	0.0729927
								cortex-DOT82217DAT6N6b_017	6	97	51	148	0.655405	0.344595		cortex-DOT82217DAT13N224d_007	13	161	16	177	0.909605	0.0903955
								total # of cells per brain		22765	14698	37463				cortex-DOT82217DAT13N224d_008	13	118	12	130	0.907692	0.0923077
								mean fraction (% ) by brain slice					0.613441	0.386559		cortex-DOT82217DAT13N224d_009	13	145	11	156	0.929487	0.0705128
																cortex-DOT82217DAT13N224d_010	13	153	8	161	0.950311	0.0496894
								cortex-DOT82217DAT6N23a_001	6	66	38	104	0.634615	0.365385		cortex-DOT82217DAT13N224d_011	13	254	16	270	0.940741	0.0592593
								cortex-DOT82217DAT6N23a_002	6	158	83	241	0.655602	0.344398		cortex-DOT82217DAT13N224a_001	13	163	12	175	0.931429	0.0685714
								cortex-DOT82217DAT6N23a_003	6	107	74	181	0.59116	0.40884		cortex-DOT82217DAT13N224a_002	13	201	16	217	0.926267	0.0737327
								cortex-DOT82217DAT6N23a_004	6	74	51	125	0.592	0.408		cortex-DOT82217DAT13N224a_003	13	274	20	294	0.931973	0.0680272
								cortex-DOT82217DAT6N23a_005	6	65	35	100	0.65	0.35		cortex-DOT82217DAT13N224a_004	13	100	7	107	0.934579	0.0654206
								cortex-DOT82217DAT6N23a_006	6	101	71	172	0.587209	0.412791		cortex-DOT82217DAT13N224a_005	13	181	8	189	0.957672	0.042328
								cortex-DOT82217DAT6N23a_007	6	96	50	146	0.657534	0.342466		cortex-DOT82217DAT13N224a_006	13	206	15	221	0.932127	0.0678733
								cortex-DOT82217DAT6N23B_001	6	80	52	132	0.606061	0.393939		cortex-DOT82217DAT13N224a_007	13	159	6	165	0.963636	0.0363636
								cortex-DOT82217DAT6N23B_002	6	119	96	215	0.553488	0.446512		cortex-DOT82217DAT13N224a_008	13	153	13	166	0.921687	0.0783133
								cortex-DOT82217DAT6N23B_003	6	126	83	209	0.602871	0.397129		cortex-DOT82217DAT13N224a_009	13	150	5	155	0.967742	0.0322581
								cortex-DOT82217DAT6N23B_004	6	117	71	188	0.62234	0.37766		cortex-DOT82217DAT13N224c_001	13	72	8	80	0.9	0.1
								cortex-DOT82217DAT6N23B_005	6	56	36	92	0.608696	0.391304		cortex-DOT82217DAT13N224c_002	13	139	10	149	0.932886	0.0671141
								cortex-DOT82217DAT6N23B_006	6	29	16	45	0.644444	0.355556		cortex-DOT82217DAT13N224c_003	13	43	2	45	0.955556	0.0444444
								cortex-DOT82217DAT6N23B_007	6	33	18	51	0.647059	0.352941		cortex-DOT82217DAT13N224c_004	13	28	1	29	0.965517	0.0344828
								cortex-DOT82217DAT6N23B_008	6	31	14	45	0.688889	0.311111		cortex-DOT82217DAT13N224c_005	13	219	12	231	0.948052	0.0519481
								cortex-DOT82217DAT6N23B_009	6	21	9	30	0.7	0.3		cortex-DOT82217DAT13N224c_006	13	126	11	137	0.919708	0.080292
								cortex-DOT82217DAT6N23B_010	6	46	31	77	0.597403	0.402597		cortex-DOT82217DAT13N224c_007	13	155	5	160	0.96875	0.03125
								cortex-DOT82217DAT6N23e_001	6	46	26	72	0.638889	0.361111		cortex-DOT82217DAT13N224c_008	13	31	3	34	0.911765	0.0882353
								cortex-DOT82217DAT6N23e_002	6	61	34	95	0.642105	0.357895		cortex-DOT82217DAT13N224c_009	13	147	15	162	0.907407	0.0925926
								cortex-DOT82217DAT6N23c_001	6	14	14	28	0.5	0.5		cortex-DOT82217DAT13N224c_010	13	149	10	159	0.937107	0.0628931
								cortex-DOT82217DAT6N23d_001	6	22	10	32	0.6875	0.3125		cortex-DOT82217DAT13N224c_011	13	161	14	175	0.92	0.08
								cortex-DOT82217DAT6N23d_002	6	23	12	35	0.657143	0.342857		cortex-DOT82217DAT13N224c_012	13	54	3	57	0.947368	0.0526316
								total # of cells per brain		1491	924	2415				cortex-DOT82217DAT13N224c_013	13	41	7	48	0.854167	0.145833
								mean fraction (% ) by brain slice					0.625682	0.374318		cortex-DOT82217DAT13N224c_014	13	78	4	82	0.95122	0.0487805
																cortex-DOT82217DAT13N224b_001	13	106	2	108	0.981481	0.0185185
																cortex-DOT82217DAT13N224b_002	13	184	14	198	0.929293	0.0707071
																cortex-DOT82217DAT13N224b_003	13	161	16	177	0.909605	0.0903955
																cortex-DOT82217DAT13N224b_004	13	27	1	28	0.964286	0.0357143
																cortex-DOT82217DAT13N224b_005	13	32	3	35	0.914286	0.0857143
																cortex-DOT82217DAT13N224b_006	13	41	1	42	0.97619	0.0238095
																cortex-DOT82217DAT13N224b_007	13	173	13	186	0.930108	0.0698925
																cortex-DOT82217DAT13N224b_008	13	167	12	179	0.932961	0.0670391
																total # of cells per brain		5597	398	5995
																mean fraction (% ) by brain slice					0.933916	0.0660836

## Sheet: Figure 8B′ 
	Figure 8B'. Pcdhg loss of function from transplanted cINs decreases their survival during the period of programmed cell death.
	3 DAT		6 DAT		13 DAT		21 DAT
	mean fraction (%) by brain
	GFP	tdTomato	GFP	tdTomato	GFP	tdTomato	GFP	tdTomato
	0.550269	0.449731	0.582122	0.417878	0.859399	0.140601	0.917118	0.0828823
	0.55404	0.44596	0.600382	0.399618	0.892118	0.108549	0.963674	0.0363256
	0.572424	0.427576	0.613441	0.386559	0.869667	0.130333	0.919622	0.0803784
	0.583141	0.416859	0.625682	0.374318	0.915625	0.0843755	0.879661	0.120339
					0.933916	0.0660836		738
	Figure 8B'. Quantifications of co-transplanted cIN precursor cells (labeled with GFP or tdTomato) at 3, 6, 13 and 21 days after transplantation (DAT). MGE precursors cells were derived from Gad1-GFP (WT Pcdhg) and Nkx2.1Cre;Ai14;Pcdhgfcon3/fcon3 (mutant Pcdhg) E13.5 embryos. Data represented as survival percentage of tdTomato or GFP cells from total cells (GFP + tdTomato cells) analyzed.
