# Supplementary material for: Clustered gamma-protocadherins regulate cortical interneuron programmed cell death
Source: eLife. 2020 Jul 7;9:e55374. doi: 10.7554/eLife.55374 (PMC7373431; doi:10.7554/eLife.55374)
Supplement: Figure 9—source data 1. [file elife-55374-fig9-data1.xlsx]

## Sheet: Figure 9 B′  and C′ source data
Figure 9B & C source data. Loss of function of Pcdhg does not affect migration and dispersal of transplanted cIN precursors cells.
Figure 9B										Figure 9C
6 DAT										21 DAT
			Density				fraction						Density				fraction
brain secion ID/mouse number		Distance from bregma (mm)	GFP+	tomato+	total	Distance from site of injection mm	% green	% red		brain secion ID/mouse number		Distance from bregma (mm)	GFP+	tomato+	total	Distance from site of injection mm	% green	%red
n1DAT6DOT05072019NAF-gad67GFPwtc_004	posterior	-3.16	1	3	4	-2.94	0.25	0.75		n2DAT21DOT05072019NAF-gad67GFPwtc_002	posterior	-2.92	3	0	3	-2.46	1	0
n1DAT6DOT05072019NAF-gad67GFPwta_009		-3.08	3	7	10	-2.86	0.3	0.7		n2DAT21DOT05072019NAF-gad67GFPwtc_001		-2.8	1	0	1	-2.34	1	0
n1DAT6DOT05072019NAF-gad67GFPwtc_002		-3.08	2	7	9	-2.86	0.222222	0.777778		n2DAT21DOT05072019NAF-gad67GFPwta_001		-2.3	3	3	6	-1.84	0.5	0.5
n1DAT6DOT05072019NAF-gad67GFPwta_013		-2.92	20	5	25	-2.7	0.8	0.2		n2DAT21DOT05072019NAF-gad67GFPwta_014		-2.18	5	0	5	-1.72	1	0
n1DAT6DOT05072019NAF-gad67GFPwtc_003		-2.92	5	6	11	-2.7	0.454545	0.545455		n2DAT21DOT05072019NAF-gad67GFPwta_002		-2.06	8	1	9	-1.6	0.888889	0.111111
n1DAT6DOT05072019NAF-gad67GFPwtc_005		-2.72	29	25	54	-2.5	0.537037	0.462963		n2DAT21DOT05072019NAF-gad67GFPwta_015		-1.94	12	1	13	-1.48	0.923077	0.0769231
n1DAT6DOT05072019NAF-gad67GFPwta_003		-2.7	16	21	37	-2.48	0.432432	0.567568		n2DAT21DOT05072019NAF-gad67GFPwta_004		-1.82	35	0	35	-1.36	1	0
n1DAT6DOT05072019NAF-gad67GFPwta_007		-2.46	35	48	83	-2.24	0.421687	0.578313		n2DAT21DOT05072019NAF-gad67GFPwta_003		-1.7	19	1	20	-1.24	0.95	0.05
n1DAT6DOT05072019NAF-gad67GFPwta_006		-2.18	55	75	130	-1.96	0.423077	0.576923		n2DAT21DOT05072019NAF-gad67GFPwta_013		-1.64	22	3	25	-1.18	0.88	0.12
n1DAT6DOT05072019NAF-gad67GFPwta_008		-1.94	97	120	217	-1.72	0.447005	0.552995		n2DAT21DOT05072019NAF-gad67GFPwta_012		-1.58	44	6	50	-1.12	0.88	0.12
n1DAT6DOT05072019NAF-gad67GFPwta_002		-1.7	211	226	437	-1.48	0.482838	0.517162		n2DAT21DOT05072019NAF-gad67GFPwta_006		-1.46	49	1	50	-1	0.98	0.02
n1DAT6DOT05072019NAF-gad67GFPwtc_001		-1.7	108	144	252	-1.48	0.428571	0.571429		n2DAT21DOT05072019NAF-gad67GFPwta_005		-1.34	88	5	93	-0.88	0.946237	0.0537634
n1DAT6DOT05072019NAF-gad67GFPwta_010		-1.58	225	270	495	-1.36	0.454545	0.545455		n2DAT21DOT05072019NAF-gad67GFPwta_010		-1.22	87	7	94	-0.76	0.925532	0.0744681
n1DAT6DOT05072019NAF-gad67GFPwtb_006		-1.58	315	363	678	-1.36	0.464602	0.535398		n2DAT21DOT05072019NAF-gad67GFPwtb_018		-1.16	198	25	223	-0.7	0.887892	0.112108
n1DAT6DOT05072019NAF-gad67GFPwtb_001		-1.46	381	342	723	-1.24	0.526971	0.473029		n2DAT21DOT05072019NAF-gad67GFPwta_011		-1.14	109	4	113	-0.68	0.964602	0.0353982
n1DAT6DOT05072019NAF-gad67GFPwta_015		-1.34	492	434	926	-1.12	0.531317	0.468683		n2DAT21DOT05072019NAF-gad67GFPwta_009		-1.06	152	10	162	-0.6	0.938272	0.0617284
n1DAT6DOT05072019NAF-gad67GFPwta_011		-1.22	534	533	1067	-1	0.500469	0.499531		n2DAT21DOT05072019NAF-gad67GFPwtb_016		-0.82	157	13	170	-0.36	0.923529	0.0764706
n1DAT6DOT05072019NAF-gad67GFPwta_014		-1.06	616	515	1131	-0.84	0.544651	0.455349		n2DAT21DOT05072019NAF-gad67GFPwta_007		-0.7	192	19	211	-0.24	0.909953	0.0900474
n1DAT6DOT05072019NAF-gad67GFPwtb_011		-0.94	686	594	1280	-0.72	0.535937	0.464062		n2DAT21DOT05072019NAF-gad67GFPwta_008		-0.58	187	23	210	-0.12	0.890476	0.109524
n1DAT6DOT05072019NAF-gad67GFPwtb_012		-0.46	771	660	1431	-0.24	0.538784	0.461216		n2DAT21DOT05072019NAF-gad67GFPwtb_005	Injection site-->	-0.46	210	29	239	0	0.878661	0.121339
n1DAT6DOT05072019NAF-gad67GFPwta_001	Injection site-->	-0.22	815	573	1388	0	0.587176	0.412824		n2DAT21DOT05072019NAF-gad67GFPwtd_001	anterior	-0.34	217	23	240	0.12	0.904167	0.0958333
n1DAT6DOT05072019NAF-gad67GFPwta_004	anterior	0.02	581	539	1120	0.24	0.51875	0.48125		n2DAT21DOT05072019NAF-gad67GFPwtb_001		-0.28	174	19	193	0.18	0.901554	0.0984456
n1DAT6DOT05072019NAF-gad67GFPwtb_016		0.14	624	550	1174	0.36	0.531516	0.468484		n2DAT21DOT05072019NAF-gad67GFPwtb_015		-0.1	163	19	182	0.36	0.895604	0.104396
n1DAT6DOT05072019NAF-gad67GFPwtb_017		0.38	546	503	1049	0.6	0.520496	0.479504		n2DAT21DOT05072019NAF-gad67GFPwtb_007		0.02	163	20	183	0.48	0.89071	0.10929
n1DAT6DOT05072019NAF-gad67GFPwta_005		0.5	486	414	900	0.72	0.54	0.46		n2DAT21DOT05072019NAF-gad67GFPwtb_012		0.26	150	11	161	0.72	0.931677	0.068323
n1DAT6DOT05072019NAF-gad67GFPwtb_002		0.5	590	523	1113	0.72	0.530099	0.469901		n2DAT21DOT05072019NAF-gad67GFPwtb_011		0.38	117	3	120	0.84	0.975	0.025
n1DAT6DOT05072019NAF-gad67GFPwtb_005		0.62	413	362	775	0.84	0.532903	0.467097		n2DAT21DOT05072019NAF-gad67GFPwtb_002		0.48	101	12	113	0.94	0.893805	0.106195
n1DAT6DOT05072019NAF-gad67GFPwtb_003		0.74	327	309	636	0.96	0.514151	0.485849		n2DAT21DOT05072019NAF-gad67GFPwtb_010		0.74	77	3	80	1.2	0.9625	0.0375
n1DAT6DOT05072019NAF-gad67GFPwta_012		1.1	217	229	446	1.32	0.486547	0.513453		n2DAT21DOT05072019NAF-gad67GFPwtb_013		0.86	60	2	62	1.32	0.967742	0.0322581
n1DAT6DOT05072019NAF-gad67GFPwtb_007		1.1	163	184	347	1.32	0.469741	0.530259		n2DAT21DOT05072019NAF-gad67GFPwtb_006		0.98	38	7	45	1.44	0.844444	0.155556
n1DAT6DOT05072019NAF-gad67GFPwtb_008		1.42	49	54	103	1.64	0.475728	0.524272		n2DAT21DOT05072019NAF-gad67GFPwtb_009		1.1	43	2	45	1.56	0.955556	0.0444444
n1DAT6DOT05072019NAF-gad67GFPwtb_013		1.42	106	105	211	1.64	0.50237	0.49763		n2DAT21DOT05072019NAF-gad67GFPwtb_017		1.18	21	1	22	1.64	0.954545	0.0454545
n1DAT6DOT05072019NAF-gad67GFPwtb_015		1.54	47	49	96	1.76	0.489583	0.510417		n2DAT21DOT05072019NAF-gad67GFPwtb_014		1.34	14	2	16	1.8	0.875	0.125
n1DAT6DOT05072019NAF-gad67GFPwtb_009		1.7	31	27	58	1.92	0.534483	0.465517		n2DAT21DOT05072019NAF-gad67GFPwtb_003		1.42	32	5	37	1.88	0.864865	0.135135
n1DAT6DOT05072019NAF-gad67GFPwtb_004		1.98	11	15	26	2.2	0.423077	0.576923		n2DAT21DOT05072019NAF-gad67GFPwtd_004		1.54	6	0	6	2	1	0
n1DAT6DOT05072019NAF-gad67GFPwtb_014		1.98	7	9	16	2.2	0.4375	0.5625		n2DAT21DOT05072019NAF-gad67GFPwtb_004		1.7	4	0	4	2.16	1	0
n1DAT6DOT05072019NAF-gad67GFPwtb_010		2.1	5	1	6	2.32	0.833333	0.166667		n2DAT21DOT05072019NAF-gad67GFPwtd_002		1.94	2	1	3	2.4	0.666667	0.333333
										n2DAT21DOT05072019NAF-gad67GFPwtb_008		1.98	4	0	4	2.44	1	0
										n2DAT21DOT05072019NAF-gad67GFPwtd_003		2.1	1	0	1	2.56	1	0
n3DAT6DOT05072019NAF-gad67GFPwtc_009	posterior	-4.24	2	2	4	-3.18	0.5	0.5		n4DAT21DOT05072019NAF-gad67GFPwtd_001	posterior	-4.24	1	0	1	-3.36	1	0
n3DAT6DOT05072019NAF-gad67GFPwtb_001		-4.16	3	6	9	-3.1	0.333333	0.666667		n4DAT21DOT05072019NAF-gad67GFPwtc_002		-3.88	1	0	1	-3	1	0
n3DAT6DOT05072019NAF-gad67GFPwtb_014		-4.16	2	2	4	-3.1	0.5	0.5		n4DAT21DOT05072019NAF-gad67GFPwtd_002		-3.8	1	0	1	-2.92	1	0
n3DAT6DOT05072019NAF-gad67GFPwtb_003		-4.04	3	7	10	-2.98	0.3	0.7		n4DAT21DOT05072019NAF-gad67GFPwtc_012		-3.64	0	0	0	-2.76	#DIV/0!	#DIV/0!
n3DAT6DOT05072019NAF-gad67GFPwtb_006		-3.64	3	11	14	-2.58	0.214286	0.785714		n4DAT21DOT05072019NAF-gad67GFPwtc_011		-3.52	2	0	2	-2.64	1	0
n3DAT6DOT05072019NAF-gad67GFPwtb_007		-3.52	6	12	18	-2.46	0.333333	0.666667		n4DAT21DOT05072019NAF-gad67GFPwtc_010		-3.4	2	0	2	-2.52	1	0
n3DAT6DOT05072019NAF-gad67GFPwtb_004		-3.4	13	14	27	-2.34	0.481481	0.518519		n4DAT21DOT05072019NAF-gad67GFPwtc_001		-3.28	2	0	2	-2.4	1	0
n3DAT6DOT05072019NAF-gad67GFPwtb_013		-3.28	13	31	44	-2.22	0.295455	0.704545		n4DAT21DOT05072019NAF-gad67GFPwtc_004		-3.16	5	0	5	-2.28	1	0
n3DAT6DOT05072019NAF-gad67GFPwtb_012		-3.16	23	40	63	-2.1	0.365079	0.634921		n4DAT21DOT05072019NAF-gad67GFPwtc_009		-3.08	3	0	3	-2.2	1	0
n3DAT6DOT05072019NAF-gad67GFPwtb_005		-2.92	50	69	119	-1.86	0.420168	0.579832		n4DAT21DOT05072019NAF-gad67GFPwtc_008		-2.92	9	0	9	-2.04	1	0
n3DAT6DOT05072019NAF-gad67GFPwtb_011		-2.92	21	50	71	-1.86	0.295775	0.704225		n4DAT21DOT05072019NAF-gad67GFPwtc_005		-2.8	13	1	14	-1.92	0.928571	0.0714286
n3DAT6DOT05072019NAF-gad67GFPwta_010		-2.8	89	103	192	-1.74	0.463542	0.536458		n4DAT21DOT05072019NAF-gad67GFPwtc_003		-2.54	15	2	17	-1.66	0.882353	0.117647
n3DAT6DOT05072019NAF-gad67GFPwtb_010		-2.8	63	81	144	-1.74	0.4375	0.5625		n4DAT21DOT05072019NAF-gad67GFPwtc_007		-2.5	6	1	7	-1.62	0.857143	0.142857
n3DAT6DOT05072019NAF-gad67GFPwta_009		-2.7	92	111	203	-1.64	0.453202	0.546798		n4DAT21DOT05072019NAF-gad67GFPwtc_006		-2.46	16	5	21	-1.58	0.761905	0.238095
n3DAT6DOT05072019NAF-gad67GFPwta_006		-2.54	129	172	301	-1.48	0.428571	0.571429		n4DAT21DOT05072019NAF-gad67GFPwta_001		-1.94	34	5	39	-1.06	0.871795	0.128205
n3DAT6DOT05072019NAF-gad67GFPwta_012		-2.46	214	260	474	-1.4	0.451477	0.548523		n4DAT21DOT05072019NAF-gad67GFPwta_015		-1.82	35	4	39	-0.94	0.897436	0.102564
n3DAT6DOT05072019NAF-gad67GFPwtb_009		-2.18	265	299	564	-1.12	0.469858	0.530142		n4DAT21DOT05072019NAF-gad67GFPwta_014		-1.76	43	3	46	-0.88	0.934783	0.0652174
n3DAT6DOT05072019NAF-gad67GFPwta_011		-1.94	483	462	945	-0.88	0.511111	0.488889		n4DAT21DOT05072019NAF-gad67GFPwta_002		-1.7	53	11	64	-0.82	0.828125	0.171875
n3DAT6DOT05072019NAF-gad67GFPwta_005		-1.82	352	418	770	-0.76	0.457143	0.542857		n4DAT21DOT05072019NAF-gad67GFPwta_003		-1.64	74	4	78	-0.76	0.948718	0.0512821
n3DAT6DOT05072019NAF-gad67GFPwta_004		-1.7	538	542	1080	-0.64	0.498148	0.501852		n4DAT21DOT05072019NAF-gad67GFPwta_013		-1.58	95	7	102	-0.7	0.931373	0.0686275
n3DAT6DOT05072019NAF-gad67GFPwtb_002		-1.46	559	510	1069	-0.4	0.522919	0.477081		n4DAT21DOT05072019NAF-gad67GFPwta_005		-1.34	96	9	105	-0.46	0.914286	0.0857143
n3DAT6DOT05072019NAF-gad67GFPwtc_012		-1.46	672	627	1299	-0.4	0.517321	0.482679		n4DAT21DOT05072019NAF-gad67GFPwta_004		-1.28	81	11	92	-0.4	0.880435	0.119565
n3DAT6DOT05072019NAF-gad67GFPwtb_008		-1.34	654	608	1262	-0.28	0.518225	0.481775		n4DAT21DOT05072019NAF-gad67GFPwta_012		-1.22	137	13	150	-0.34	0.913333	0.0866667
n3DAT6DOT05072019NAF-gad67GFPwtc_001		-1.22	771	612	1383	-0.16	0.557484	0.442516		n4DAT21DOT05072019NAF-gad67GFPwta_006		-1.16	143	19	162	-0.28	0.882716	0.117284
n3DAT6DOT05072019NAF-gad67GFPwta_007	injection site-->	-1.06	853	747	1600	0	0.533125	0.466875		n4DAT21DOT05072019NAF-gad67GFPwta_007		-1.12	179	14	193	-0.24	0.927461	0.0725389
n3DAT6DOT05072019NAF-gad67GFPwta_016		-1.06	882	720	1602	0	0.550562	0.449438		n4DAT21DOT05072019NAF-gad67GFPwta_011		-1.06	197	16	213	-0.18	0.924883	0.0751174
n3DAT6DOT05072019NAF-gad67GFPwta_013	anterior	-0.94	819	687	1506	0.12	0.543825	0.456175		n4DAT21DOT05072019NAF-gad67GFPwta_010		-0.94	215	23	238	-0.06	0.903361	0.0966387
n3DAT6DOT05072019NAF-gad67GFPwta_008		-0.58	648	575	1223	0.48	0.529845	0.470155		n4DAT21DOT05072019NAF-gad67GFPwta_009	injection site-->	-0.88	222	28	250	0	0.888	0.112
n3DAT6DOT05072019NAF-gad67GFPwta_003		-0.34	637	560	1197	0.72	0.532164	0.467836		n4DAT21DOT05072019NAF-gad67GFPwta_008	anterior	-0.82	202	26	228	0.06	0.885965	0.114035
n3DAT6DOT05072019NAF-gad67GFPwta_014		-0.34	548	463	1011	0.72	0.542038	0.457962		n4DAT21DOT05072019NAF-gad67GFPwtb_010		-0.58	207	18	225	0.3	0.92	0.08
n3DAT6DOT05072019NAF-gad67GFPwta_015		-0.1	443	399	842	0.96	0.526128	0.473872		n4DAT21DOT05072019NAF-gad67GFPwtb_002		-0.46	203	23	226	0.42	0.89823	0.10177
n3DAT6DOT05072019NAF-gad67GFPwta_001		0.14	390	396	786	1.2	0.496183	0.503817		n4DAT21DOT05072019NAF-gad67GFPwtb_011		-0.22	152	24	176	0.66	0.863636	0.136364
n3DAT6DOT05072019NAF-gad67GFPwta_002		0.38	301	321	622	1.44	0.483923	0.516077		n4DAT21DOT05072019NAF-gad67GFPwtb_014		0.02	114	12	126	0.9	0.904762	0.0952381
n3DAT6DOT05072019NAF-gad67GFPwta_017		0.5	200	202	402	1.56	0.497512	0.502488		n4DAT21DOT05072019NAF-gad67GFPwtb_017		0.14	143	10	153	1.02	0.934641	0.0653595
n3DAT6DOT05072019NAF-gad67GFPwtc_002		0.5	243	234	477	1.56	0.509434	0.490566		n4DAT21DOT05072019NAF-gad67GFPwtb_015		0.38	133	14	147	1.26	0.904762	0.0952381
n3DAT6DOT05072019NAF-gad67GFPwtc_004		0.86	122	140	262	1.92	0.465649	0.534351		n4DAT21DOT05072019NAF-gad67GFPwtb_003		0.62	113	12	125	1.5	0.904	0.096
n3DAT6DOT05072019NAF-gad67GFPwtc_003		0.98	69	117	186	2.04	0.370968	0.629032		n4DAT21DOT05072019NAF-gad67GFPwtb_001		0.74	129	6	135	1.62	0.955556	0.0444444
n3DAT6DOT05072019NAF-gad67GFPwtc_007		1.1	50	73	123	2.16	0.406504	0.593496		n4DAT21DOT05072019NAF-gad67GFPwtb_005		0.86	76	11	87	1.74	0.873563	0.126437
n3DAT6DOT05072019NAF-gad67GFPwtc_014		1.1	33	40	73	2.16	0.452055	0.547945		n4DAT21DOT05072019NAF-gad67GFPwtb_013		0.98	54	8	62	1.86	0.870968	0.129032
n3DAT6DOT05072019NAF-gad67GFPwtc_015		1.34	17	32	49	2.4	0.346939	0.653061		n4DAT21DOT05072019NAF-gad67GFPwtb_004		1.1	52	3	55	1.98	0.945455	0.0545455
n3DAT6DOT05072019NAF-gad67GFPwtc_005		1.7	7	12	19	2.76	0.368421	0.631579		n4DAT21DOT05072019NAF-gad67GFPwtb_006		1.18	47	4	51	2.06	0.921569	0.0784314
n3DAT6DOT05072019NAF-gad67GFPwtc_011		1.7	15	17	32	2.76	0.46875	0.53125		n4DAT21DOT05072019NAF-gad67GFPwtb_009		1.26	32	2	34	2.14	0.941176	0.0588235
n3DAT6DOT05072019NAF-gad67GFPwtc_013		1.78	19	21	40	2.84	0.475	0.525		n4DAT21DOT05072019NAF-gad67GFPwtb_018		1.34	24	1	25	2.22	0.96	0.04
n3DAT6DOT05072019NAF-gad67GFPwtc_006		1.94	1	5	6	3	0.166667	0.833333		n4DAT21DOT05072019NAF-gad67GFPwtb_019		1.42	22	1	23	2.3	0.956522	0.0434783
n3DAT6DOT05072019NAF-gad67GFPwtc_008		1.98	1	5	6	3.04	0.166667	0.833333		n4DAT21DOT05072019NAF-gad67GFPwtb_016		1.72	9	1	10	2.6	0.9	0.1
n3DAT6DOT05072019NAF-gad67GFPwtc_010		1.98	5	12	17	3.04	0.294118	0.705882		n4DAT21DOT05072019NAF-gad67GFPwtb_020		1.78	7	1	8	2.66	0.875	0.125
										n4DAT21DOT05072019NAF-gad67GFPwtb_007		1.94	4	0	4	2.82	1	0
										n4DAT21DOT05072019NAF-gad67GFPwtb_008		1.98	12	0	12	2.86	1	0
										n4DAT21DOT05072019NAF-gad67GFPwtb_012		2.1	1	0	1	2.98	1	0
										n4DAT21DOT05072019NAF-gad67GFPwtd_003		2.1	1	0	1	2.98	1	0
n5DAT6DOT05072019NAF-gad67GFPwtc_007	Posterior	-4.72	13	17	30	-2.18	0.433333	0.566667
n5DAT6DOT05072019NAF-gad67GFPwtc_008		-4.6	24	39	63	-2.06	0.380952	0.619048
n5DAT6DOT05072019NAF-gad67GFPwtc_009		-4.48	50	51	101	-1.94	0.49505	0.50495
n5DAT6DOT05072019NAF-gad67GFPwtb_014		-4.36	108	103	211	-1.82	0.511848	0.488152
n5DAT6DOT05072019NAF-gad67GFPwtb_002		-4.24	110	112	222	-1.7	0.495495	0.504505
n5DAT6DOT05072019NAF-gad67GFPwtb_015		-4.24	85	54	139	-1.7	0.611511	0.388489		n6DAT21DOT05072019NAF-gad67GFPwtd_005	Posterior	-4.6	42	4	46	-2.42	0.913043	0.0869565
n5DAT6DOT05072019NAF-gad67GFPwtb_013		-4.16	183	169	352	-1.62	0.519886	0.480114		n6DAT21DOT05072019NAF-gad67GFPwtd_001		-4.48	77	9	86	-2.3	0.895349	0.104651
n5DAT6DOT05072019NAF-gad67GFPwtb_001		-3.88	267	264	531	-1.34	0.502825	0.497175		n6DAT21DOT05072019NAF-gad67GFPwtd_002		-4.36	62	7	69	-2.18	0.898551	0.101449
n5DAT6DOT05072019NAF-gad67GFPwtb_016		-3.8	306	279	585	-1.26	0.523077	0.476923		n6DAT21DOT05072019NAF-gad67GFPwtd_003		-4.24	67	9	76	-2.06	0.881579	0.118421
n5DAT6DOT05072019NAF-gad67GFPwtb_007		-3.28	329	322	651	-0.74	0.505376	0.494624		n6DAT21DOT05072019NAF-gad67GFPwta_008		-4.16	117	17	134	-1.98	0.873134	0.126866
n5DAT6DOT05072019NAF-gad67GFPwtb_011		-3.16	414	350	764	-0.62	0.541885	0.458115		n6DAT21DOT05072019NAF-gad67GFPwtd_017		-4.1	102	9	111	-1.92	0.918919	0.0810811
n5DAT6DOT05072019NAF-gad67GFPwtb_004		-3.08	435	425	860	-0.54	0.505814	0.494186		n6DAT21DOT05072019NAF-gad67GFPwta_009		-3.88	120	24	144	-1.7	0.833333	0.166667
n5DAT6DOT05072019NAF-gad67GFPwtb_005		-2.92	519	455	974	-0.38	0.532854	0.467146		n6DAT21DOT05072019NAF-gad67GFPwtd_016		-3.84	138	16	154	-1.66	0.896104	0.103896
n5DAT6DOT05072019NAF-gad67GFPwtb_010		-2.92	621	530	1151	-0.38	0.539531	0.460469		n6DAT21DOT05072019NAF-gad67GFPwta_010		-3.8	132	24	156	-1.62	0.846154	0.153846
n5DAT6DOT05072019NAF-gad67GFPwtb_009		-2.7	628	516	1144	-0.16	0.548951	0.451049		n6DAT21DOT05072019NAF-gad67GFPwta_007		-3.52	167	18	185	-1.34	0.902703	0.0972973
n5DAT6DOT05072019NAF-gad67GFPwta_012		-2.7	640	523	1163	-0.16	0.550301	0.449699		n6DAT21DOT05072019NAF-gad67GFPwta_012		-3.46	174	37	211	-1.28	0.824645	0.175355
n5DAT6DOT05072019NAF-gad67GFPwtb_006	injection site-->	-2.54	625	482	1107	0	0.564589	0.435411		n6DAT21DOT05072019NAF-gad67GFPwta_011		-3.4	215	32	247	-1.22	0.870445	0.129555
n5DAT6DOT05072019NAF-gad67GFPwtb_012		-2.54	643	501	1144	0	0.562063	0.437937		n6DAT21DOT05072019NAF-gad67GFPwta_006		-3.28	193	23	216	-1.1	0.893519	0.106481
n5DAT6DOT05072019NAF-gad67GFPwta_008	Anterior	-2.46	655	562	1217	0.08	0.538209	0.461791		n6DAT21DOT05072019NAF-gad67GFPwta_013		-3.22	255	24	279	-1.04	0.913978	0.0860215
n5DAT6DOT05072019NAF-gad67GFPwta_010		-2.46	636	478	1114	0.08	0.570916	0.429084		n6DAT21DOT05072019NAF-gad67GFPwta_005		-3.16	289	38	327	-0.98	0.883792	0.116208
n5DAT6DOT05072019NAF-gad67GFPwtb_003		-2.18	435	357	792	0.36	0.549242	0.450758		n6DAT21DOT05072019NAF-gad67GFPwta_004		-3.08	242	30	272	-0.9	0.889706	0.110294
n5DAT6DOT05072019NAF-gad67GFPwta_005		-2.06	513	385	898	0.48	0.571269	0.428731		n6DAT21DOT05072019NAF-gad67GFPwta_014		-2.92	308	36	344	-0.74	0.895349	0.104651
n5DAT6DOT05072019NAF-gad67GFPwta_009		-1.94	393	319	712	0.6	0.551966	0.448034		n6DAT21DOT05072019NAF-gad67GFPwtb_007		-2.86	301	30	331	-0.68	0.909366	0.0906344
n5DAT6DOT05072019NAF-gad67GFPwta_001		-1.82	375	340	715	0.72	0.524476	0.475524		n6DAT21DOT05072019NAF-gad67GFPwta_002		-2.8	295	39	334	-0.62	0.883234	0.116766
n5DAT6DOT05072019NAF-gad67GFPwta_011		-1.7	277	232	509	0.84	0.544204	0.455796		n6DAT21DOT05072019NAF-gad67GFPwta_015		-2.7	317	38	355	-0.52	0.892958	0.107042
n5DAT6DOT05072019NAF-gad67GFPwtb_008		-1.58	236	170	406	0.96	0.581281	0.418719		n6DAT21DOT05072019NAF-gad67GFPwta_001	injection site-->	-2.18	347	41	388	0	0.89433	0.10567
n5DAT6DOT05072019NAF-gad67GFPwtc_013		-1.46	218	190	408	1.08	0.534314	0.465686		n6DAT21DOT05072019NAF-gad67GFPwta_003	Anterior	-1.92	273	34	307	0.26	0.889251	0.110749
n5DAT6DOT05072019NAF-gad67GFPwta_007		-1.06	176	184	360	1.48	0.488889	0.511111		n6DAT21DOT05072019NAF-gad67GFPwtb_012		-1.88	273	36	309	0.3	0.883495	0.116505
n5DAT6DOT05072019NAF-gad67GFPwta_004		-0.94	145	131	276	1.6	0.525362	0.474638		n6DAT21DOT05072019NAF-gad67GFPwtb_011		-1.82	254	41	295	0.36	0.861017	0.138983
n5DAT6DOT05072019NAF-gad67GFPwta_006		-0.58	82	82	164	1.96	0.5	0.5		n6DAT21DOT05072019NAF-gad67GFPwtb_009		-1.7	247	16	263	0.48	0.939163	0.0608365
n5DAT6DOT05072019NAF-gad67GFPwta_002		-0.46	76	109	185	2.08	0.410811	0.589189		n6DAT21DOT05072019NAF-gad67GFPwtb_010		-1.58	169	15	184	0.6	0.918478	0.0815217
n5DAT6DOT05072019NAF-gad67GFPwta_013		-0.46	69	60	129	2.08	0.534884	0.465116		n6DAT21DOT05072019NAF-gad67GFPwtb_005		-1.46	164	18	182	0.72	0.901099	0.0989011
n5DAT6DOT05072019NAF-gad67GFPwta_015		-0.34	27	55	82	2.2	0.329268	0.670732		n6DAT21DOT05072019NAF-gad67GFPwtb_006		-1.4	151	21	172	0.78	0.877907	0.122093
n5DAT6DOT05072019NAF-gad67GFPwtc_001		-0.1	25	42	67	2.44	0.373134	0.626866		n6DAT21DOT05072019NAF-gad67GFPwtb_008		-1.34	122	3	125	0.84	0.976	0.024
n5DAT6DOT05072019NAF-gad67GFPwta_014		0.14	21	30	51	2.68	0.411765	0.588235		n6DAT21DOT05072019NAF-gad67GFPwtb_004		-1.28	134	11	145	0.9	0.924138	0.0758621
n5DAT6DOT05072019NAF-gad67GFPwta_003		0.26	17	19	36	2.8	0.472222	0.527778		n6DAT21DOT05072019NAF-gad67GFPwtb_003		-1.22	113	11	124	0.96	0.91129	0.0887097
n5DAT6DOT05072019NAF-gad67GFPwtc_011		0.38	13	19	32	2.92	0.40625	0.59375		n6DAT21DOT05072019NAF-gad67GFPwtc._008		-1.12	89	5	94	1.06	0.946809	0.0531915
n5DAT6DOT05072019NAF-gad67GFPwtc_002		0.5	9	19	28	3.04	0.321429	0.678571		n6DAT21DOT05072019NAF-gad67GFPwtb_014		-1.06	64	7	69	1.12	0.927536	0.101449
n5DAT6DOT05072019NAF-gad67GFPwtc_010		0.62	4	3	7	3.16	0.571429	0.428571		n6DAT21DOT05072019NAF-gad67GFPwtc._004		-0.94	80	5	85	1.24	0.941176	0.0588235
n5DAT6DOT05072019NAF-gad67GFPwtc_004		0.98	11	8	19	3.52	0.578947	0.421053		n6DAT21DOT05072019NAF-gad67GFPwtc._007		-0.88	66	8	74	1.3	0.891892	0.108108
n5DAT6DOT05072019NAF-gad67GFPwtc_005		1.1	10	7	17	3.64	0.588235	0.411765		n6DAT21DOT05072019NAF-gad67GFPwtb_002		-0.7	66	10	76	1.48	0.868421	0.131579
n5DAT6DOT05072019NAF-gad67GFPwtc_003		1.34	4	1	5	3.88	0.8	0.2		n6DAT21DOT05072019NAF-gad67GFPwtb_013		-0.58	54	1	56	1.6	0.964286	0.0178571
n5DAT6DOT05072019NAF-gad67GFPwtc_012		1.34	1	1	2	3.88	0.5	0.5		n6DAT21DOT05072019NAF-gad67GFPwtb_001		-0.34	53	2	55	1.84	0.963636	0.0363636
n5DAT6DOT05072019NAF-gad67GFPwtc_006		1.42	2	2	4	3.96	0.5	0.5		n6DAT21DOT05072019NAF-gad67GFPwtc._015		-0.28	44	4	48	1.9	0.916667	0.0833333
										n6DAT21DOT05072019NAF-gad67GFPwtc._017		-0.1	31	3	34	2.08	0.911765	0.0882353
										n6DAT21DOT05072019NAF-gad67GFPwtc._010		0.02	43	4	47	2.2	0.914894	0.0851064
										n6DAT21DOT05072019NAF-gad67GFPwtc._005		0.38	33	0	33	2.56	1	0
										n6DAT21DOT05072019NAF-gad67GFPwtc._003		0.5	19	2	21	2.68	0.904762	0.0952381
										n6DAT21DOT05072019NAF-gad67GFPwtc._006		0.62	26	1	27	2.8	0.962963	0.037037
										n6DAT21DOT05072019NAF-gad67GFPwtc._013		0.92	19	2	21	3.1	0.904762	0.0952381
n7DAT6DOT05072019NAF-gad67GFPwtc_003	Posterior	-3.16	3	2	5	-3.42	0.6	0.4		n6DAT21DOT05072019NAF-gad67GFPwtc._001		0.98	17	1	18	3.16	0.944444	0.0555556
n7DAT6DOT05072019NAF-gad67GFPwtc_004		-3.08	5	1	6	-3.34	0.833333	0.166667		n6DAT21DOT05072019NAF-gad67GFPwtc._009		1.04	16	2	18	3.22	0.888889	0.111111
n7DAT6DOT05072019NAF-gad67GFPwta_003		-2.92	0	3	3	-3.18	0	1		n6DAT21DOT05072019NAF-gad67GFPwtc._002		1.1	9	0	9	3.28	1	0
n7DAT6DOT05072019NAF-gad67GFPwta_016		-2.92	4	3	7	-3.18	0.571429	0.428571		n6DAT21DOT05072019NAF-gad67GFPwtd_007		1.14	3	1	4	3.32	0.75	0.25
n7DAT6DOT05072019NAF-gad67GFPwta_007		-2.8	5	5	10	-3.06	0.5	0.5		n6DAT21DOT05072019NAF-gad67GFPwtc._012		1.18	8	2	10	3.36	0.8	0.2
n7DAT6DOT05072019NAF-gad67GFPwtc_001		-2.7	6	6	12	-2.96	0.5	0.5		n6DAT21DOT05072019NAF-gad67GFPwtd_009		1.54	10	2	12	3.72	0.833333	0.166667
n7DAT6DOT05072019NAF-gad67GFPwta1_007		-2.3	4	12	16	-2.56	0.25	0.75		n6DAT21DOT05072019NAF-gad67GFPwtd_006		1.7	4	1	5	3.88	0.8	0.2
n7DAT6DOT05072019NAF-gad67GFPwtc_002		-2.3	36	35	71	-2.56	0.507042	0.492958		n6DAT21DOT05072019NAF-gad67GFPwtc._016		1.78	6	0	6	3.96	1	0
n7DAT6DOT05072019NAF-gad67GFPwta_002		-2.18	8	12	20	-2.44	0.4	0.6		n6DAT21DOT05072019NAF-gad67GFPwtc._011		1.98	6	1	7	4.16	0.857143	0.142857
n7DAT6DOT05072019NAF-gad67GFPwta_017		-2.18	23	20	43	-2.44	0.534884	0.465116		n6DAT21DOT05072019NAF-gad67GFPwtd_010		2.1	2	0	2	4.28	1	0
n7DAT6DOT05072019NAF-gad67GFPwta1_005		-2.06	22	43	65	-2.32	0.338462	0.661538		n6DAT21DOT05072019NAF-gad67GFPwtd_011		2.16	2	0	2	4.34	1	0
n7DAT6DOT05072019NAF-gad67GFPwta_004		-1.82	43	49	92	-2.08	0.467391	0.532609		n6DAT21DOT05072019NAF-gad67GFPwtd_008		2.22	4	0	4	4.4	1	0
n7DAT6DOT05072019NAF-gad67GFPwta_008		-1.58	55	83	138	-1.84	0.398551	0.601449		n6DAT21DOT05072019NAF-gad67GFPwtd_004		2.34	1	0	1	4.52	1	0
n7DAT6DOT05072019NAF-gad67GFPwta_006		-1.5	172	175	347	-1.76	0.495677	0.504323		n6DAT21DOT05072019NAF-gad67GFPwtc._014		CAN'T DETERMINE DISTANCE	28	1	29	#VALUE!	0.965517	0.0344828
n7DAT6DOT05072019NAF-gad67GFPwtb_008		-1.46	118	105	223	-1.72	0.529148	0.470852		n6DAT21DOT05072019NAF-gad67GFPwtd_012		CAN'T DETERMINE DISTANCE	7	0	7	#VALUE!	1	0
n7DAT6DOT05072019NAF-gad67GFPwta_005		-1.34	215	266	481	-1.6	0.446985	0.553015		n6DAT21DOT05072019NAF-gad67GFPwtd_013		CAN'T DETERMINE DISTANCE	4	1	5	#VALUE!	0.8	0.2
n7DAT6DOT05072019NAF-gad67GFPwta1_001		-1.22	304	333	637	-1.48	0.477237	0.522763		n6DAT21DOT05072019NAF-gad67GFPwtd_014		CAN'T DETERMINE DISTANCE	2	0	2	#VALUE!	1	0
n7DAT6DOT05072019NAF-gad67GFPwta_001		-1.06	368	473	841	-1.32	0.437574	0.562426		n6DAT21DOT05072019NAF-gad67GFPwtd_015		CAN'T DETERMINE DISTANCE	5	1	6	#VALUE!	0.833333	0.166667
n7DAT6DOT05072019NAF-gad67GFPwta1_004		-0.82	509	502	1011	-1.08	0.503462	0.496538
n7DAT6DOT05072019NAF-gad67GFPwtb_005		-0.46	936	872	1808	-0.72	0.517699	0.482301
n7DAT6DOT05072019NAF-gad67GFPwtb_018		-0.34	1106	959	2065	-0.6	0.535593	0.464407
n7DAT6DOT05072019NAF-gad67GFPwta1_003		-0.22	792	663	1455	-0.48	0.54433	0.45567
n7DAT6DOT05072019NAF-gad67GFPwtb_006		0.02	1099	973	2072	-0.24	0.530405	0.469595
n7DAT6DOT05072019NAF-gad67GFPwta1_002		0.14	1259	1053	2312	-0.12	0.54455	0.45545		n8DAT21DOT05072019NAF-gad67GFPwtc_004	Posterior	-4.04	1	0	1	-2.92	1	0
n7DAT6DOT05072019NAF-gad67GFPwtb_009	injection site-->	0.26	1338	997	2335	0	0.573019	0.426981		n8DAT21DOT05072019NAF-gad67GFPwtc_005		-3.88	1	0	1	-2.76	1	0
n7DAT6DOT05072019NAF-gad67GFPwtb_007	Anterior	0.7	1110	962	2072	0.44	0.535714	0.464286		n8DAT21DOT05072019NAF-gad67GFPwtc_006		-3.52	2	0	2	-2.4	1	0
n7DAT6DOT05072019NAF-gad67GFPwtb_019		0.74	1038	843	1881	0.48	0.551834	0.448166		n8DAT21DOT05072019NAF-gad67GFPwtb_005		-3.4	2	1	3	-2.28	0.666667	0.333333
n7DAT6DOT05072019NAF-gad67GFPwtb_020		1.1	779	806	1585	0.84	0.491483	0.508517		n8DAT21DOT05072019NAF-gad67GFPwtb_006		-3.28	3	1	4	-2.16	0.75	0.25
n7DAT6DOT05072019NAF-gad67GFPwtb_001		1.18	839	728	1567	0.92	0.535418	0.464582		n8DAT21DOT05072019NAF-gad67GFPwtc_003		-3.28	9	1	10	-2.16	0.9	0.1
n7DAT6DOT05072019NAF-gad67GFPwtb_021		1.42	793	692	1485	1.16	0.534007	0.465993		n8DAT21DOT05072019NAF-gad67GFPwtc_002		-3.16	5	1	6	-2.04	0.833333	0.166667
n7DAT6DOT05072019NAF-gad67GFPwtb_010		1.42	586	555	1141	1.16	0.513585	0.486415		n8DAT21DOT05072019NAF-gad67GFPwtc_001		-3.08	9	0	9	-1.96	1	0
n7DAT6DOT05072019NAF-gad67GFPwtb_017		1.54	627	453	1080	1.28	0.580556	0.419444		n8DAT21DOT05072019NAF-gad67GFPwtc_007		-2.92	19	1	20	-1.8	0.95	0.05
n7DAT6DOT05072019NAF-gad67GFPwtb_002		1.7	389	370	759	1.44	0.512516	0.487484		n8DAT21DOT05072019NAF-gad67GFPwtc_008		-2.8	24	5	29	-1.68	0.827586	0.172414
n7DAT6DOT05072019NAF-gad67GFPwtb_003		1.94	416	416	832	1.68	0.5	0.5		n8DAT21DOT05072019NAF-gad67GFPwtc_009		-2.7	16	0	16	-1.58	1	0
n7DAT6DOT05072019NAF-gad67GFPwtb_004		1.98	268	275	543	1.72	0.493554	0.506446		n8DAT21DOT05072019NAF-gad67GFPwtc_010		-2.6	45	2	47	-1.48	0.957447	0.0425532
n7DAT6DOT05072019NAF-gad67GFPwtb_011		2.1	184	195	379	1.84	0.485488	0.514512		n8DAT21DOT05072019NAF-gad67GFPwtc_011		-2.54	54	0	54	-1.42	1	0
n7DAT6DOT05072019NAF-gad67GFPwtb_013		2.22	99	121	220	1.96	0.45	0.55		n8DAT21DOT05072019NAF-gad67GFPwtb_004		-1.94	86	4	90	-0.82	0.955556	0.0444444
n7DAT6DOT05072019NAF-gad67GFPwtb_012		2.34	65	92	157	2.08	0.414013	0.585987		n8DAT21DOT05072019NAF-gad67GFPwtb_002		-1.82	81	9	90	-0.7	0.9	0.1
n7DAT6DOT05072019NAF-gad67GFPwtb_014		2.46	63	92	155	2.2	0.406452	0.593548		n8DAT21DOT05072019NAF-gad67GFPwtb_003		-1.76	88	8	96	-0.64	0.916667	0.0833333
n7DAT6DOT05072019NAF-gad67GFPwtb_015		2.58	47	70	117	2.32	0.401709	0.598291		n8DAT21DOT05072019NAF-gad67GFPwtb_001		-1.7	102	7	109	-0.58	0.93578	0.0642202
n7DAT6DOT05072019NAF-gad67GFPwtb_016		2.8	4	9	13	2.54	0.307692	0.692308		n8DAT21DOT05072019NAF-gad67GFPwtb_007		-1.46	166	5	171	-0.34	0.97076	0.0292398
n7DAT6DOT05072019NAF-gad67GFPwta1_006		2.8	12	10	22	2.54	0.545455	0.454545		n8DAT21DOT05072019NAF-gad67GFPwtb_014		-1.46	151	4	155	-0.34	0.974194	0.0258065
										n8DAT21DOT05072019NAF-gad67GFPwtb_008		-1.4	149	17	166	-0.28	0.89759	0.10241
										n8DAT21DOT05072019NAF-gad67GFPwtb_009		-1.34	173	16	189	-0.22	0.915344	0.0846561
										n8DAT21DOT05072019NAF-gad67GFPwtb_010		-1.28	239	19	258	-0.16	0.926357	0.0736434
										n8DAT21DOT05072019NAF-gad67GFPwtb_011		-1.22	264	20	284	-0.1	0.929577	0.0704225
										n8DAT21DOT05072019NAF-gad67GFPwtb_013	injection site-->	-1.12	268	18	286	0	0.937063	0.0629371
										n8DAT21DOT05072019NAF-gad67GFPwta_001	Aterior	-1.06	333	44	377	0.06	0.883289	0.116711
n9DAT6DOT05072019NAF-gad67GFPwtb_012	posterior	-4.16	1	1	2	-2.58	0.5	0.5		n8DAT21DOT05072019NAF-gad67GFPwtb_012		-1.06	338	39	377	0.06	0.896552	0.103448
n9DAT6DOT05072019NAF-gad67GFPwtb_010		-4.04	3	0	3	-2.46	1	0		n8DAT21DOT05072019NAF-gad67GFPwta_002		-0.82	303	31	334	0.3	0.907186	0.0928144
n9DAT6DOT05072019NAF-gad67GFPwtb_013		-3.8	6	6	12	-2.22	0.5	0.5		n8DAT21DOT05072019NAF-gad67GFPwta_003		-0.7	271	26	297	0.42	0.912458	0.0875421
n9DAT6DOT05072019NAF-gad67GFPwtb_009		-3.64	12	9	21	-2.06	0.571429	0.428571		n8DAT21DOT05072019NAF-gad67GFPwta_004		-0.58	243	19	262	0.54	0.927481	0.0725191
n9DAT6DOT05072019NAF-gad67GFPwtb_007		-3.52	10	10	20	-1.94	0.5	0.5		n8DAT21DOT05072019NAF-gad67GFPwta_005		-0.34	232	14	246	0.78	0.943089	0.0569106
n9DAT6DOT05072019NAF-gad67GFPwtb_004		-3.28	18	21	39	-1.7	0.461538	0.538462		n8DAT21DOT05072019NAF-gad67GFPwta_007		-0.1	214	17	231	1.02	0.926407	0.0735931
n9DAT6DOT05072019NAF-gad67GFPwta_004		-3.16	25	28	53	-1.58	0.471698	0.528302		n8DAT21DOT05072019NAF-gad67GFPwta_008		0.14	177	11	188	1.26	0.941489	0.0585106
n9DAT6DOT05072019NAF-gad67GFPwtb_002		-3.08	46	35	81	-1.5	0.567901	0.432099		n8DAT21DOT05072019NAF-gad67GFPwta_006		0.22	198	21	219	1.34	0.90411	0.0958904
n9DAT6DOT05072019NAF-gad67GFPwtb_005		-2.92	93	104	197	-1.34	0.472081	0.527919		n8DAT21DOT05072019NAF-gad67GFPwta_016		0.38	160	12	172	1.5	0.930233	0.0697674
n9DAT6DOT05072019NAF-gad67GFPwtb_008		-2.92	75	70	145	-1.34	0.517241	0.482759		n8DAT21DOT05072019NAF-gad67GFPwta_015		0.5	116	9	125	1.62	0.928	0.072
n9DAT6DOT05072019NAF-gad67GFPwtb_006		-2.86	64	105	169	-1.28	0.378698	0.621302		n8DAT21DOT05072019NAF-gad67GFPwta_014		0.62	116	8	124	1.74	0.935484	0.0645161
n9DAT6DOT05072019NAF-gad67GFPwtb_011		-2.76	216	237	453	-1.18	0.476821	0.523179		n8DAT21DOT05072019NAF-gad67GFPwta_012		0.86	116	5	121	1.98	0.958678	0.0413223
n9DAT6DOT05072019NAF-gad67GFPwtb_003		-2.7	369	401	770	-1.12	0.479221	0.520779		n8DAT21DOT05072019NAF-gad67GFPwta_013		0.92	69	3	72	2.04	0.958333	0.0416667
n9DAT6DOT05072019NAF-gad67GFPwtb_001		-2.54	578	535	1113	-0.96	0.519317	0.480683		n8DAT21DOT05072019NAF-gad67GFPwta_011		0.98	84	10	94	2.1	0.893617	0.106383
n9DAT6DOT05072019NAF-gad67GFPwta_002		-2.18	668	681	1349	-0.6	0.495182	0.504818		n8DAT21DOT05072019NAF-gad67GFPwta_009		1.1	52	5	57	2.22	0.912281	0.0877193
n9DAT6DOT05072019NAF-gad67GFPwta_003		-2.12	575	549	1124	-0.54	0.511566	0.488434		n8DAT21DOT05072019NAF-gad67GFPwtc_012		1.14	54	3	57	2.26	0.947368	0.0526316
n9DAT6DOT05072019NAF-gad67GFPwta_014		-2.06	878	854	1732	-0.48	0.506928	0.493072		n8DAT21DOT05072019NAF-gad67GFPwtd_001		1.14	38	4	42	2.26	0.904762	0.0952381
n9DAT6DOT05072019NAF-gad67GFPwta_005		-1.94	895	775	1670	-0.36	0.535928	0.464072		n8DAT21DOT05072019NAF-gad67GFPwta_010		1.18	30	1	31	2.3	0.967742	0.0322581
n9DAT6DOT05072019NAF-gad67GFPwta_001		-1.7	800	835	1635	-0.12	0.489297	0.510703		n8DAT21DOT05072019NAF-gad67GFPwtd_012		1.34	21	1	22	2.46	0.954545	0.0454545
n9DAT6DOT05072019NAF-gad67GFPwta_006	injection site-->	-1.58	921	876	1797	0	0.512521	0.487479		n8DAT21DOT05072019NAF-gad67GFPwtd_010		1.54	20	1	21	2.66	0.952381	0.047619
n9DAT6DOT05072019NAF-gad67GFPwta_015	Anterior	-1.46	1072	891	1963	0.12	0.546103	0.453897		n8DAT21DOT05072019NAF-gad67GFPwtd_011		1.7	16	3	19	2.82	0.842105	0.157895
n9DAT6DOT05072019NAF-gad67GFPwta_007		-1.34	947	696	1643	0.24	0.576385	0.423615		n8DAT21DOT05072019NAF-gad67GFPwtd_002		1.94	4	0	4	3.06	1	0
n9DAT6DOT05072019NAF-gad67GFPwta_008		-1.22	799	801	1600	0.36	0.499375	0.500625		n8DAT21DOT05072019NAF-gad67GFPwtd_008		1.98	4	1	5	3.1	0.8	0.2
n9DAT6DOT05072019NAF-gad67GFPwta_009		-1.06	782	694	1476	0.52	0.52981	0.47019		n8DAT21DOT05072019NAF-gad67GFPwtd_009		1.98	6	0	6	3.1	1	0
n9DAT6DOT05072019NAF-gad67GFPwtc_011		-0.94	541	545	1086	0.64	0.498158	0.501842		n8DAT21DOT05072019NAF-gad67GFPwtd_007		2.22	7	2	9	3.34	0.777778	0.222222
n9DAT6DOT05072019NAF-gad67GFPwta_012		-0.82	755	658	1413	0.76	0.534324	0.465676		n8DAT21DOT05072019NAF-gad67GFPwtd_004		2.46	1	0	1	3.58	1	0
n9DAT6DOT05072019NAF-gad67GFPwta_011		-0.46	604	578	1182	1.12	0.510998	0.489002		n8DAT21DOT05072019NAF-gad67GFPwtd_003		2.58	1	0	1	3.7	1	0
n9DAT6DOT05072019NAF-gad67GFPwta_010		-0.34	410	482	892	1.24	0.459641	0.540359		n8DAT21DOT05072019NAF-gad67GFPwtd_006		2.58	4	1	5	3.7	0.8	0.2
n9DAT6DOT05072019NAF-gad67GFPwta_013		-0.22	636	588	1224	1.36	0.519608	0.480392		n8DAT21DOT05072019NAF-gad67GFPwtd_005		2.68	1	0	1	3.8	1	0
n9DAT6DOT05072019NAF-gad67GFPwtc_014		0.14	383	309	692	1.72	0.553468	0.446532
n9DAT6DOT05072019NAF-gad67GFPwtc_013		0.38	215	213	428	1.96	0.502336	0.497664
n9DAT6DOT05072019NAF-gad67GFPwtc_012		0.5	180	183	363	2.08	0.495868	0.504132
n9DAT6DOT05072019NAF-gad67GFPwtc_002		0.62	171	162	333	2.2	0.513514	0.486486
n9DAT6DOT05072019NAF-gad67GFPwtc_009		0.74	47	88	135	2.32	0.348148	0.651852
n9DAT6DOT05072019NAF-gad67GFPwtc_001		0.86	30	23	53	2.44	0.566038	0.433962
n9DAT6DOT05072019NAF-gad67GFPwtc_008		0.98	32	32	64	2.56	0.5	0.5
n9DAT6DOT05072019NAF-gad67GFPwtc_006		1.1	7	6	13	2.68	0.538462	0.461538
n9DAT6DOT05072019NAF-gad67GFPwtc_010		1.1	8	9	17	2.68	0.470588	0.529412
n9DAT6DOT05072019NAF-gad67GFPwtc_003		1.18	6	1	7	2.76	0.857143	0.142857
n9DAT6DOT05072019NAF-gad67GFPwtc_007		1.42	2	2	4	3	0.5	0.5
n9DAT6DOT05072019NAF-gad67GFPwtc_005		1.7	1	0	1	3.28	1	0
n9DAT6DOT05072019NAF-gad67GFPwtc_004		1.98	2	0	2	3.56	1	0
Figure 9B & C source data. Detailed quantifications of all transplanted (GFP and tdTomato labeled) cells in the cortex of recipient mice at 6 and 21 days after transplantation (DAT). MGE precursors cells were derived from Gad1-GFP (WT Pcdhg) and Nkx2.1Cre;Ai14;Pcdhgfcon3/fcon3 (mutant Pcdhg) E13.5 embryos, and equal proportions of GFP and tdTomato labeled cells were mixed before being co-transpla…
