# Supplementary material for: Clustered gamma-protocadherins regulate cortical interneuron programmed cell death
Source: eLife. 2020 Jul 7;9:e55374. doi: 10.7554/eLife.55374 (PMC7373431; doi:10.7554/eLife.55374)
Supplement: Figure 10—figure supplement 1—source data 1. [file elife-55374-fig10-figsupp1-data1.xlsx]

## Sheet: Figure 10- Fig Supp 1
	Figure 10 - Figure supplement 1 source data. Survival of MGE-derived cIN precursor cells is not affect by genetic background or type of fluorophore expressed.
	Figure 10 - Figure supplement 1
	6 DAT		21 DAT
	# of transplant-derived cells per brain
	GFP	tdTomato	GFP	tdTomato
	29996	26216	10030	7958
	27336	22054	22460	18228
	32468	26676	20572	15842
	28022	23280	20890	15528
	mean # of transplant-derived cells
	GFP	tdTomato	GFP	tdTomato
	29455.5	24556.5	18488	14389
	relative change (%) from 6 to 21 DAT
		GFP	tdTomato
		-0.372341	-0.414045
	Survival Fraction % (red or green) by brain
	6 DAT		21 DAT
	GFP	tdTomato	GFP	tdTomato
	0.533623	0.466377	0.557594	0.442406
	0.553472	0.446528	0.552006	0.447994
	0.548965	0.451035	0.564948	0.435052
	0.546217	0.453783	0.573688	0.426312
	Figure 10 - Figure supplement 1 source data. Quantifications of all transplanted cells carrying WT Pcdhg (GFP and tdTomato labeled) in the cortex of recipient mice at 6 and 21 days after transplantation (DAT). The transplanted MGE precursors cells were derived from Gad1-GFP (WT Pcdhg) and Nkx2.1Cre;Ai14 (WT Pcdhg) E13.5 embryos. Four brains were analyzed per timepoint, and the average relative ch…
