# Supplementary material for: Clustered gamma-protocadherins regulate cortical interneuron programmed cell death
Source: eLife. 2020 Jul 7;9:e55374. doi: 10.7554/eLife.55374 (PMC7373431; doi:10.7554/eLife.55374)
Supplement: Figure 10—source data 1. [file elife-55374-fig10-data1.xlsx]

## Sheet: Figure 10 C raw data
Figure 10C. Detailed quantifications of all transplanted (GFP and tdTomato labeled that carry WT Pcdhg) cells in the cortex of recipient mice at 6 and 21 days after transplantation (DAT). MGE precursors cells were derived from Gad1-GFP (WT Pcdhg) and Nkx2.1Cre;Ai14 (WT Pcdhg) E13.5 embryos, and equal proportions of GFP and tdTomato labeled cells were mixed before being co-transplanted into P2-6 b…
6 DAT					21 DAT					Figure 10C
	Density					Density
slice brain secion ID/mouse number	GFP+	tomato+	total		slice brain secion ID/mouse number	GFP+	tomato+	total		6 DAT	21 DAT
N1DOT11152019_DAT6_section-a_001	41	39	80		N2DOT11152019_DAT21_section-a_001	86	48	134		# of all transplant-derived cells (green and red) per brain
N1DOT11152019_DAT6_section-a_002	66	57	123		N2DOT11152019_DAT21_section-a_002	220	169	389		56212	17988
N1DOT11152019_DAT6_section-a_003	22	14	36		N2DOT11152019_DAT21_section-a_003	427	364	791		49390	40688
N1DOT11152019_DAT6_section-a_004	177	182	359		N2DOT11152019_DAT21_section-a_004	463	381	844		59144	36414
N1DOT11152019_DAT6_section-a_005	347	267	614		N2DOT11152019_DAT21_section-a_005	327	258	585		51302	36424
N1DOT11152019_DAT6_section-a_006	453	379	832		N2DOT11152019_DAT21_section-a_006	195	150	345
N1DOT11152019_DAT6_section-a_007	805	712	1517		N2DOT11152019_DAT21_section-a_007	395	300	695		mean # of all transplant-derived cells (green and red)
N1DOT11152019_DAT6_section-a_008	619	555	1174		N2DOT11152019_DAT21_section-a_008	377	286	663		54012	32878.5
N1DOT11152019_DAT6_section-a_009	796	663	1459		N2DOT11152019_DAT21_section-a_009	350	275	625
N1DOT11152019_DAT6_section-a_010	1130	956	2086		N2DOT11152019_DAT21_section-a_010	264	223	487		relative change (%) from 6 to 21 DAT
N1DOT11152019_DAT6_section-a_011	714	585	1299		N2DOT11152019_DAT21_section-a_011	181	127	308		-0.391274
N1DOT11152019_DAT6_section-a_012	114	98	212		N2DOT11152019_DAT21_section-a_012	53	59	112
N1DOT11152019_DAT6_section-a_013	2	2	4		N2DOT11152019_DAT21_section-a_013	36	30	66
N1DOT11152019_DAT6_section-a_014	8	6	14		N2DOT11152019_DAT21_section-a_014	29	16	45
N1DOT11152019_DAT6_section-b_001	244	230	474		N2DOT11152019_DAT21_section-a_015	111	88	199
N1DOT11152019_DAT6_section-b_002	153	131	284		N2DOT11152019_DAT21_section-b_001	3	5	8		Figure 10 - Figure supplement 1
N1DOT11152019_DAT6_section-b_003	89	82	171		N2DOT11152019_DAT21_section-b_002	45	60	105
N1DOT11152019_DAT6_section-b_004	21	24	45		N2DOT11152019_DAT21_section-b_003	1	0	1		6 DAT		21 DAT
N1DOT11152019_DAT6_section-b_005	39	38	77		N2DOT11152019_DAT21_section-b_004	1	0	1		# of transplant-derived cells per brain
N1DOT11152019_DAT6_section-b_006	540	453	993		N2DOT11152019_DAT21_section-b_005	3	1	4		GFP	tdTomato	GFP	tdTomato
N1DOT11152019_DAT6_section-b_007	685	631	1316		N2DOT11152019_DAT21_section-b_006	4	5	9		29996	26216	10030	7958
N1DOT11152019_DAT6_section-b_008	972	853	1825		N2DOT11152019_DAT21_section-b_007	11	16	27		27336	22054	22460	18228
N1DOT11152019_DAT6_section-b_009	1153	1021	2174		N2DOT11152019_DAT21_section-b_008	15	7	22		32468	26676	20572	15842
N1DOT11152019_DAT6_section-b_010	1145	1003	2148		N2DOT11152019_DAT21_section-b_009	48	30	78		28022	23280	20896	15528
N1DOT11152019_DAT6_section-b_011	1291	1147	2438		N2DOT11152019_DAT21_section-b_010	156	135	291
N1DOT11152019_DAT6_section-b_012	1194	971	2165		N2DOT11152019_DAT21_section-b_011	179	145	324		mean # of transplant-derived cells
N1DOT11152019_DAT6_section-b_013	1036	957	1993		N2DOT11152019_DAT21_section-b_012	314	242	556		GFP	tdTomato	GFP	tdTomato
N1DOT11152019_DAT6_section-b_014	815	755	1570		N2DOT11152019_DAT21_section-b_013	428	302	730		29455.5	24556.5	18489.5	14389
N1DOT11152019_DAT6_section-b_015	302	276	578		N2DOT11152019_DAT21_section-b_014	69	53	122
N1DOT11152019_DAT6_section-c_001	3	5	8		N2DOT11152019_DAT21_section-b_015	125	97	222		relative change (%) from 6 to 21 DAT
N1DOT11152019_DAT6_section-c_002	2	2	4		N2DOT11152019_DAT21_section-b_016	25	21	46			GFP	tdTomato
N1DOT11152019_DAT6_section-c_003	7	4	11		N2DOT11152019_DAT21_section-b_017	8	9	17			-0.37229	-0.414045
N1DOT11152019_DAT6_section-c_004	13	10	23		N2DOT11152019_DAT21_section-b_018	17	26	43
total # of cells counted per brain	14998	13108	28106		N2DOT11152019_DAT21_section-c_001	2	4	6
total # of cells per brain	29996	26216	56212		N2DOT11152019_DAT21_section-c_002	1	1	2		Survival Fraction (red or green)
Survival Fraction (red or green)	0.533623	0.466377			N2DOT11152019_DAT21_section-c_003	1	0	1		6 DAT		21 DAT
					N2DOT11152019_DAT21_section-c_004	1	1	2		GFP	tdTomato	GFP	tdTomato
					N2DOT11152019_DAT21_section-c_005	4	1	5		0.533623	0.466377	0.557594	0.442406
N3DOT11152019_DAT21_section-a_001	1316	1123	2439		N2DOT11152019_DAT21_section-c_006	2	4	6		0.553472	0.446528	0.552006	0.447994
N3DOT11152019_DAT21_section-a_002	1315	1021	2336		N2DOT11152019_DAT21_section-c_007	15	15	30		0.548965	0.451035	0.564948	0.435052
N3DOT11152019_DAT21_section-a_003	1353	1012	2365		N2DOT11152019_DAT21_section-c_008	16	12	28		0.546217	0.453783	0.573688	0.426312
N3DOT11152019_DAT21_section-a_004	995	745	1740		N2DOT11152019_DAT21_section-c_009	7	13	20
N3DOT11152019_DAT21_section-a_005	1198	905	2103		total # of cells counted per brain	5015	3979	8994
N3DOT11152019_DAT21_section-a_006	350	278	628		total # of cells per brain	10030	7958	17988
N3DOT11152019_DAT21_section-a_007	584	510	1094		Survival Fraction (red or green)	0.557594	0.442406
N3DOT11152019_DAT21_section-a_008	168	164	332
N3DOT11152019_DAT21_section-a_009	58	49	107
N3DOT11152019_DAT21_section-a_010	6	5	11		N8DOT11152019_DAT21_section-a_001	27	29	56
N3DOT11152019_DAT21_section-a_011	2	0	2		N8DOT11152019_DAT21_section-a_002	13	5	18
N3DOT11152019_DAT21_section-a_012	1	2	3		N8DOT11152019_DAT21_section-a_003	5	6	11
N3DOT11152019_DAT21_section-a_013	29	25	54		N8DOT11152019_DAT21_section-a_004	41	40	81
N3DOT11152019_DAT21_section-a_014	14	14	28		N8DOT11152019_DAT21_section-a_005	61	42	103
N3DOT11152019_DAT21_section-a_015	90	100	190		N8DOT11152019_DAT21_section-a_006	89	87	176
N3DOT11152019_DAT21_section-a_016	273	226	499		N8DOT11152019_DAT21_section-a_007	110	76	186
N3DOT11152019_DAT21_section-a_017	826	699	1525		N8DOT11152019_DAT21_section-a_008	138	111	249
N3DOT11152019_DAT21_section-a_018	753	626	1379		N8DOT11152019_DAT21_section-a_009	227	181	408
N3DOT11152019_DAT21_section-a_019	1104	833	1937		N8DOT11152019_DAT21_section-a_010	180	146	326
N3DOT11152019_DAT21_section-b_001	74	72	146		N8DOT11152019_DAT21_section-a_011	251	216	467
N3DOT11152019_DAT21_section-b_002	28	33	61		N8DOT11152019_DAT21_section-a_012	243	199	442
N3DOT11152019_DAT21_section-b_003	18	14	32		N8DOT11152019_DAT21_section-a_013	262	193	455
N3DOT11152019_DAT21_section-b_004	1	0	1		N8DOT11152019_DAT21_section-a_014	266	194	460
N3DOT11152019_DAT21_section-b_005	3	4	7		N8DOT11152019_DAT21_section-a_015	256	224	480
N3DOT11152019_DAT21_section-b_006	4	4	8		N8DOT11152019_DAT21_section-a_016	223	196	419
N3DOT11152019_DAT21_section-b_007	10	2	12		N8DOT11152019_DAT21_section-a_017	213	194	407
N3DOT11152019_DAT21_section-b_008	124	137	261		N8DOT11152019_DAT21_section-a_018	209	135	344
N3DOT11152019_DAT21_section-b_009	557	446	1003		N8DOT11152019_DAT21_section-a_019	150	115	265
N3DOT11152019_DAT21_section-b_010	768	658	1426		N8DOT11152019_DAT21_section-a_020	57	49	106
N3DOT11152019_DAT21_section-b_011	1201	863	2064		N8DOT11152019_DAT21_section-a_021	75	69	144
N3DOT11152019_DAT21_section-b_012	237	263	500		N8DOT11152019_DAT21_section-a_022	26	18	44
N3DOT11152019_DAT21_section-b_013	208	194	402		N8DOT11152019_DAT21_section-a_023	19	16	35
total # of cells counted per brain	13668	11027	24695		N8DOT11152019_DAT21_section-a_024	13	9	22
total # of cells per brain	27336	22054	49390		N8DOT11152019_DAT21_section-b_001	400	302	702
Survival Fraction (red or green)	0.553472	0.446528			N8DOT11152019_DAT21_section-b_002	400	301	701
					N8DOT11152019_DAT21_section-b_003	322	261	583
					N8DOT11152019_DAT21_section-b_004	349	252	601
N5DOT11152019_DAT21_section-a_001	914	763	1677		N8DOT11152019_DAT21_section-b_005	335	233	568
N5DOT11152019_DAT21_section-a_002	1331	1090	2421		N8DOT11152019_DAT21_section-b_006	308	231	539
N5DOT11152019_DAT21_section-a_003	977	743	1720		N8DOT11152019_DAT21_section-b_007	326	242	568
N5DOT11152019_DAT21_section-a_004	1269	1049	2318		N8DOT11152019_DAT21_section-b_008	373	296	669
N5DOT11152019_DAT21_section-a_005	503	408	911		N8DOT11152019_DAT21_section-b_009	340	276	616
N5DOT11152019_DAT21_section-a_006	231	187	418		N8DOT11152019_DAT21_section-b_010	451	356	807
N5DOT11152019_DAT21_section-a_007	334	316	650		N8DOT11152019_DAT21_section-b_011	418	373	791
N5DOT11152019_DAT21_section-a_008	13	20	33		N8DOT11152019_DAT21_section-b_012	283	273	556
N5DOT11152019_DAT21_section-a_009	26	31	57		N8DOT11152019_DAT21_section-b_013	386	296	682
N5DOT11152019_DAT21_section-a_010	55	56	111		N8DOT11152019_DAT21_section-b_014	346	285	631
N5DOT11152019_DAT21_section-a_011	1	2	3		N8DOT11152019_DAT21_section-b_015	374	299	673
N5DOT11152019_DAT21_section-a_012	2	1	3		N8DOT11152019_DAT21_section-c_001	169	128	297
N5DOT11152019_DAT21_section-a_013	6	4	10		N8DOT11152019_DAT21_section-c_002	114	79	193
N5DOT11152019_DAT21_section-a_014	126	117	243		N8DOT11152019_DAT21_section-c_003	114	111	225
N5DOT11152019_DAT21_section-a_015	918	775	1693		N8DOT11152019_DAT21_section-c_004	141	142	283
N5DOT11152019_DAT21_section-a_016	1159	1018	2177		N8DOT11152019_DAT21_section-c_005	167	153	320
N5DOT11152019_DAT21_section-a_017	810	629	1439		N8DOT11152019_DAT21_section-c_006	164	135	299
N5DOT11152019_DAT21_section-a_018	1406	1081	2487		N8DOT11152019_DAT21_section-c_007	210	162	372
N5DOT11152019_DAT21_section-a_019	1031	889	1920		N8DOT11152019_DAT21_section-c_008	202	172	374
N5DOT11152019_DAT21_section-b_001	26	23	49		N8DOT11152019_DAT21_section-c_009	244	206	450
N5DOT11152019_DAT21_section-b_002	13	17	30		N8DOT11152019_DAT21_section-c_010	199	198	397
N5DOT11152019_DAT21_section-b_003	60	57	117		N8DOT11152019_DAT21_section-c_011	145	104	249
N5DOT11152019_DAT21_section-b_004	381	329	710		N8DOT11152019_DAT21_section-c_012	110	96	206
N5DOT11152019_DAT21_section-b_005	239	197	436		N8DOT11152019_DAT21_section-d_001	34	35	69
N5DOT11152019_DAT21_section-b_006	981	792	1773		N8DOT11152019_DAT21_section-d_002	17	14	31
N5DOT11152019_DAT21_section-b_007	613	534	1147		N8DOT11152019_DAT21_section-d_003	4	2	6
N5DOT11152019_DAT21_section-b_008	726	597	1323		N8DOT11152019_DAT21_section-d_004	22	18	40
N5DOT11152019_DAT21_section-b_009	1149	872	2021		N8DOT11152019_DAT21_section-d_005	16	15	31
N5DOT11152019_DAT21_section-b_010	584	464	1048		N8DOT11152019_DAT21_section-d_006	39	34	73
N5DOT11152019_DAT21_section-b_011	156	109	265		N8DOT11152019_DAT21_section-d_007	10	12	22
N5DOT11152019_DAT21_section-b_012	132	115	247		N8DOT11152019_DAT21_section-d_008	34	29	63
N5DOT11152019_DAT21_section-b_013	47	43	90		N8DOT11152019_DAT21_section-d_009	223	207	430
N5DOT11152019_DAT21_section-b_014	6	3	9		N8DOT11152019_DAT21_section-d_010	71	75	146
N5DOT11152019_DAT21_section-b_015	5	2	7		N8DOT11152019_DAT21_section-d_011	76	69	145
N5DOT11152019_DAT21_section-b_016	4	5	9		N8DOT11152019_DAT21_section-d_012	93	62	155
total # of cells counted per brain	16234	13338	29572		N8DOT11152019_DAT21_section-d_013	47	30	77
total # of cells per brain	32468	26676	59144		total # of cells counted per brain	11230	9114	20344
Survival Fraction (red or green)	0.548965	0.451035			total # of cells per brain	22460	18228	40688
					Survival Fraction (red or green)	0.552006	0.447994
N7DOT11152019_DAT6_section-a_001	1096	972	2068
N7DOT11152019_DAT6_section-a_002	852	761	1613		N10DOT11152019_DAT21_section-a_001	306	219	525
N7DOT11152019_DAT6_section-a_003	878	797	1675		N10DOT11152019_DAT21_section-a_002	238	171	409
N7DOT11152019_DAT6_section-a_004	773	578	1351		N10DOT11152019_DAT21_section-a_003	444	320	764
N7DOT11152019_DAT6_section-a_005	537	447	984		N10DOT11152019_DAT21_section-a_004	518	427	945
N7DOT11152019_DAT6_section-a_006	681	545	1226		N10DOT11152019_DAT21_section-a_005	333	232	565
N7DOT11152019_DAT6_section-a_007	156	139	295		N10DOT11152019_DAT21_section-a_006	337	253	590
N7DOT11152019_DAT6_section-a_008	74	70	144		N10DOT11152019_DAT21_section-a_007	309	225	534
N7DOT11152019_DAT6_section-a_009	200	196	396		N10DOT11152019_DAT21_section-a_008	297	229	526
N7DOT11152019_DAT6_section-a_010	21	21	42		N10DOT11152019_DAT21_section-a_009	235	202	437
N7DOT11152019_DAT6_section-a_011	8	8	16		N10DOT11152019_DAT21_section-a_010	157	105	262
N7DOT11152019_DAT6_section-a_012	3	3	6		N10DOT11152019_DAT21_section-a_011	59	39	98
N7DOT11152019_DAT6_section-a_013	42	32	74		N10DOT11152019_DAT21_section-a_012	252	156	408
N7DOT11152019_DAT6_section-a_014	313	299	612		N10DOT11152019_DAT21_section-a_013	442	326	768
N7DOT11152019_DAT6_section-a_015	805	613	1418		N10DOT11152019_DAT21_section-a_014	491	369	860
N7DOT11152019_DAT6_section-a_016	1125	885	2010		N10DOT11152019_DAT21_section-a_015	245	202	447
N7DOT11152019_DAT6_section-a_017	836	705	1541		N10DOT11152019_DAT21_section-d_001	272	197	469
N7DOT11152019_DAT6_section-a_018	963	725	1688		N10DOT11152019_DAT21_section-d_002	274	184	458
N7DOT11152019_DAT6_section-a_019	838	683	1521		N10DOT11152019_DAT21_section-d_003	270	232	502
N7DOT11152019_DAT6_section-b_001	144	124	268		N10DOT11152019_DAT21_section-d_004	256	169	425
N7DOT11152019_DAT6_section-b_002	100	76	176		N10DOT11152019_DAT21_section-d_005	189	128	317
N7DOT11152019_DAT6_section-b_003	499	392	891		N10DOT11152019_DAT21_section-d_006	145	145	290
N7DOT11152019_DAT6_section-b_004	336	255	591		N10DOT11152019_DAT21_section-d_007	165	141	306
N7DOT11152019_DAT6_section-b_005	839	723	1562		N10DOT11152019_DAT21_section-d_008	157	134	291
N7DOT11152019_DAT6_section-b_006	639	560	1199		N10DOT11152019_DAT21_section-d_009	103	95	198
N7DOT11152019_DAT6_section-b_007	861	676	1537		N10DOT11152019_DAT21_section-d_010	172	141	313
N7DOT11152019_DAT6_section-b_008	278	252	530		N10DOT11152019_DAT21_section-d_011	118	89	207
N7DOT11152019_DAT6_section-b_009	46	47	93		N10DOT11152019_DAT21_section-d_012	70	61	131
N7DOT11152019_DAT6_section-b_010	11	14	25		N10DOT11152019_DAT21_section-d_013	68	71	139
N7DOT11152019_DAT6_section-b_011	5	2	7		N10DOT11152019_DAT21_section-d_014	135	120	255
N7DOT11152019_DAT6_section-b_012	6	7	13		N10DOT11152019_DAT21_section-d_015	18	12	30
N7DOT11152019_DAT6_section-b_013	37	24	61		N10DOT11152019_DAT21_section-d_016	18	8	26
N7DOT11152019_DAT6_section-b_014	5	5	10		N10DOT11152019_DAT21_section-d_017	17	9	26
N7DOT11152019_DAT6_section-c_001.jp2	3	3	6		N10DOT11152019_DAT21_section-d_018	41	41	82
N7DOT11152019_DAT6_section-c_001.jp3	1	1	2		N10DOT11152019_DAT21_section-d_019	31	31	62
total # of cells counted per brain	14011	11640	25651		N10DOT11152019_DAT21_section-d_020	88	82	170
total # of cells per brain	28022	23280	51302		N10DOT11152019_DAT21_section-d_021	166	153	319
Survival Fraction (red or green)	0.546217	0.453783			N10DOT11152019_DAT21_section-d_022	223	160	383
					N10DOT11152019_DAT21_section-d_023	288	220	508
					N10DOT11152019_DAT21_section-d_024	24	14	38
					N10DOT11152019_DAT21_section-d_025	28	20	48
					N10DOT11152019_DAT21_section-c_001	166	165	331
					N10DOT11152019_DAT21_section-c_002	213	179	392
					N10DOT11152019_DAT21_section-c_003	133	90	223
					N10DOT11152019_DAT21_section-c_004	149	117	266
					N10DOT11152019_DAT21_section-c_005	110	75	185
					N10DOT11152019_DAT21_section-c_006	162	146	308
					N10DOT11152019_DAT21_section-c_007	112	78	190
					N10DOT11152019_DAT21_section-c_008	149	124	273
					N10DOT11152019_DAT21_section-c_009	164	123	287
					N10DOT11152019_DAT21_section-c_010	203	143	346
					N10DOT11152019_DAT21_section-c_011	155	118	273
					N10DOT11152019_DAT21_section-b_001	63	44	107
					N10DOT11152019_DAT21_section-b_002	81	74	155
					N10DOT11152019_DAT21_section-b_003	16	10	26
					N10DOT11152019_DAT21_section-b_004	11	5	16
					N10DOT11152019_DAT21_section-b_005	53	27	80
					N10DOT11152019_DAT21_section-b_006	55	52	107
					N10DOT11152019_DAT21_section-b_007	55	36	91
					N10DOT11152019_DAT21_section-b_008	25	18	43
					N10DOT11152019_DAT21_section-b_009	29	21	50
					N10DOT11152019_DAT21_section-b_010	84	63	147
					N10DOT11152019_DAT21_section-b_011	7	10	17
					N10DOT11152019_DAT21_section-b_012	52	33	85
					N10DOT11152019_DAT21_section-b_013	9	9	18
					N10DOT11152019_DAT21_section-b_014	31	29	60
					total # of cells counted per brain	10286	7921	18207
					total # of cells per brain	20572	15842	36414
					Survival Fraction (red or green)	0.564948	0.435052
					N11DOT11152019_DAT21_section-a_001	5	2	7
					N11DOT11152019_DAT21_section-a_002	13	9	22
					N11DOT11152019_DAT21_section-a_003	13	5	18
					N11DOT11152019_DAT21_section-a_004	22	16	38
					N11DOT11152019_DAT21_section-a_005	26	12	38
					N11DOT11152019_DAT21_section-a_006	67	60	127
					N11DOT11152019_DAT21_section-a_007	32	33	65
					N11DOT11152019_DAT21_section-a_008	52	32	84
					N11DOT11152019_DAT21_section-a_009	49	47	96
					N11DOT11152019_DAT21_section-a_010	68	34	102
					N11DOT11152019_DAT21_section-a_011	128	120	248
					N11DOT11152019_DAT21_section-a_012	119	90	209
					N11DOT11152019_DAT21_section-a_013	124	79	203
					N11DOT11152019_DAT21_section-a_014	75	63	138
					N11DOT11152019_DAT21_section-a_015	133	95	228
					N11DOT11152019_DAT21_section-a_016	182	116	298
					N11DOT11152019_DAT21_section-a_017	208	126	334
					N11DOT11152019_DAT21_section-a_018	188	142	330
					N11DOT11152019_DAT21_section-a_019	210	172	382
					N11DOT11152019_DAT21_section-a_020	277	216	493
					N11DOT11152019_DAT21_section-a_021	351	228	579
					N11DOT11152019_DAT21_section-a_022	496	371	867
					N11DOT11152019_DAT21_section-a_023	324	210	534
					N11DOT11152019_DAT21_section-a_024	230	183	413
					N11DOT11152019_DAT21_section-b_001	419	302	721
					N11DOT11152019_DAT21_section-b_002	367	297	664
					N11DOT11152019_DAT21_section-b_003	280	201	481
					N11DOT11152019_DAT21_section-b_004	356	320	676
					N11DOT11152019_DAT21_section-b_005	407	299	706
					N11DOT11152019_DAT21_section-b_006	484	366	850
					N11DOT11152019_DAT21_section-b_007	419	319	738
					N11DOT11152019_DAT21_section-b_008	473	349	822
					N11DOT11152019_DAT21_section-b_009	406	299	705
					N11DOT11152019_DAT21_section-b_010	392	283	675
					N11DOT11152019_DAT21_section-b_011	398	310	708
					N11DOT11152019_DAT21_section-b_012	454	299	753
					N11DOT11152019_DAT21_section-b_013	340	238	578
					N11DOT11152019_DAT21_section-b_014	235	177	412
					N11DOT11152019_DAT21_section-b_015	259	203	462
					N11DOT11152019_DAT21_section-c_001	17	18	35
					N11DOT11152019_DAT21_section-c_002	58	59	117
					N11DOT11152019_DAT21_section-c_003	72	75	147
					N11DOT11152019_DAT21_section-c_004	118	91	209
					N11DOT11152019_DAT21_section-c_005	94	80	174
					N11DOT11152019_DAT21_section-c_006	216	146	362
					N11DOT11152019_DAT21_section-c_007	170	116	286
					N11DOT11152019_DAT21_section-c_008	245	172	417
					N11DOT11152019_DAT21_section-c_009	144	120	264
					N11DOT11152019_DAT21_section-c_010	64	47	111
					N11DOT11152019_DAT21_section-c_011	41	17	58
					N11DOT11152019_DAT21_section-c_012	45	34	79
					N11DOT11152019_DAT21_section-d_001	4	1	5
					N11DOT11152019_DAT21_section-d_002	28	14	42
					N11DOT11152019_DAT21_section-d_003	5	6	11
					N11DOT11152019_DAT21_section-d_004	10	8	18
					N11DOT11152019_DAT21_section-d_005	9	4	13
					N11DOT11152019_DAT21_section-d_006	4	3	7
					N11DOT11152019_DAT21_section-d_007	1	1	2
					N11DOT11152019_DAT21_section-d_008	5	7	12
					N11DOT11152019_DAT21_section-d_009	16	21	37
					N11DOT11152019_DAT21_section-d_010	1	1	2
					total # of cells counted per brain	10448	7764	18212
					total # of cells per brain	20896	15528	36424
					Survival Fraction (red or green)	0.573688	0.426312

## Sheet: Figure 10 C
	Figure 10C source data. Transplanted MGE-derived cIN precursors cells recapitulate timing and extent of endogenous cIN programmed cell death.
	Figure 10C
	6 DAT	21 DAT
	# of all transplant-derived cells (green and red) per brain
	56212	17988
	49390	40688
	59144	36414
	51302	36424
	mean # of all transplant-derived cells (green and red)
	54012	32878.5
	relative change (%) from 6 to 21 DAT
	-0.391274
	Figure 10C source data. Quantifications of all transplanted cells carrying WT Pcdhg (GFP and tdTomato labeled) in the cortex of recipient mice at 6 and 21 days after transplantation (DAT). The transplanted MGE precursors cells were derived from Gad1-GFP (WT Pcdhg) and Nkx2.1Cre;Ai14 (WT Pcdhg) E13.5 embryos. Four brains were analyzed per timepoint, and the average relative change in poppulation f…

## Sheet: Figure 10 D raw data
Figure 10E. Detailed quantifications of all transplanted (GFP and tdTomato labeled) cells in the cortex of recipient mice at 6 and 21 days after transplantation (DAT). MGE precursors cells were derived from Gad1-GFP (WT Pcdhg) and Nkx2.1Cre;Ai14;Pcdhgfcon3/fcon3 (mutant Pcdhg) E13.5 embryos, and equal proportions of GFP and tdTomato labeled cells were mixed before being co-transplanted into P2-6 …
6 DAT					21 DAT
	Density					Density				Figure 10E
slice brain secion ID/mouse number	GFP+	tomato+	total		slice brain secion ID/mouse number	GFP+	tomato+	total		6 DAT		21 DAT
n1DAT6DOT05072019NAF-gad67GFPwtc_004	1	3	4		n2DAT21DOT05072019NAF-gad67GFPwtc_002	3	0	3		# of transplant-derived cells per brain
n1DAT6DOT05072019NAF-gad67GFPwta_009	3	7	10		n2DAT21DOT05072019NAF-gad67GFPwtc_001	1	0	1		GFP	tdTomato	GFP	tdTomato
n1DAT6DOT05072019NAF-gad67GFPwtc_002	2	7	9		n2DAT21DOT05072019NAF-gad67GFPwta_001	3	3	6		19240	17688	5936	562
n1DAT6DOT05072019NAF-gad67GFPwta_013	20	5	25		n2DAT21DOT05072019NAF-gad67GFPwta_014	5	0	5		22646	21654	6834	706
n1DAT6DOT05072019NAF-gad67GFPwtc_003	5	6	11		n2DAT21DOT05072019NAF-gad67GFPwta_002	8	1	9		20860	17994	13362	1556
n1DAT6DOT05072019NAF-gad67GFPwtc_005	29	25	54		n2DAT21DOT05072019NAF-gad67GFPwta_015	12	1	13		31498	28668	10372	860
n1DAT6DOT05072019NAF-gad67GFPwta_003	16	21	37		n2DAT21DOT05072019NAF-gad67GFPwta_004	35	0	35		27766	26186	8408	738
n1DAT6DOT05072019NAF-gad67GFPwta_007	35	48	83		n2DAT21DOT05072019NAF-gad67GFPwta_003	19	1	20
n1DAT6DOT05072019NAF-gad67GFPwta_006	55	75	130		n2DAT21DOT05072019NAF-gad67GFPwta_013	22	3	25		mean # of transplant-derived cells
n1DAT6DOT05072019NAF-gad67GFPwta_008	97	120	217		n2DAT21DOT05072019NAF-gad67GFPwta_012	44	6	50		GFP	tdTomato	GFP	tdTomato
n1DAT6DOT05072019NAF-gad67GFPwta_002	211	226	437		n2DAT21DOT05072019NAF-gad67GFPwta_006	49	1	50		24402	22438	8982.4	884.4
n1DAT6DOT05072019NAF-gad67GFPwtc_001	108	144	252		n2DAT21DOT05072019NAF-gad67GFPwta_005	88	5	93
n1DAT6DOT05072019NAF-gad67GFPwta_010	225	270	495		n2DAT21DOT05072019NAF-gad67GFPwta_010	87	7	94
n1DAT6DOT05072019NAF-gad67GFPwtb_006	315	363	678		n2DAT21DOT05072019NAF-gad67GFPwtb_018	198	25	223		relative change (%) from 6 to 21 DAT
n1DAT6DOT05072019NAF-gad67GFPwtb_001	381	342	723		n2DAT21DOT05072019NAF-gad67GFPwta_011	109	4	113			GFP+	tomato+
n1DAT6DOT05072019NAF-gad67GFPwta_015	492	434	926		n2DAT21DOT05072019NAF-gad67GFPwta_009	152	10	162			-0.631899	-0.960585
n1DAT6DOT05072019NAF-gad67GFPwta_011	534	533	1067		n2DAT21DOT05072019NAF-gad67GFPwtb_016	157	13	170
n1DAT6DOT05072019NAF-gad67GFPwta_014	616	515	1131		n2DAT21DOT05072019NAF-gad67GFPwta_007	192	19	211
n1DAT6DOT05072019NAF-gad67GFPwtb_011	686	594	1280		n2DAT21DOT05072019NAF-gad67GFPwta_008	187	23	210
n1DAT6DOT05072019NAF-gad67GFPwtb_012	771	660	1431		n2DAT21DOT05072019NAF-gad67GFPwtb_005	210	29	239
n1DAT6DOT05072019NAF-gad67GFPwta_001	815	573	1388		n2DAT21DOT05072019NAF-gad67GFPwtd_001	217	23	240
n1DAT6DOT05072019NAF-gad67GFPwta_004	581	539	1120		n2DAT21DOT05072019NAF-gad67GFPwtb_001	174	19	193
n1DAT6DOT05072019NAF-gad67GFPwtb_016	624	550	1174		n2DAT21DOT05072019NAF-gad67GFPwtb_015	163	19	182
n1DAT6DOT05072019NAF-gad67GFPwtb_017	546	503	1049		n2DAT21DOT05072019NAF-gad67GFPwtb_007	163	20	183
n1DAT6DOT05072019NAF-gad67GFPwta_005	486	414	900		n2DAT21DOT05072019NAF-gad67GFPwtb_012	150	11	161
n1DAT6DOT05072019NAF-gad67GFPwtb_002	590	523	1113		n2DAT21DOT05072019NAF-gad67GFPwtb_011	117	3	120
n1DAT6DOT05072019NAF-gad67GFPwtb_005	413	362	775		n2DAT21DOT05072019NAF-gad67GFPwtb_002	101	12	113
n1DAT6DOT05072019NAF-gad67GFPwtb_003	327	309	636		n2DAT21DOT05072019NAF-gad67GFPwtb_010	77	3	80
n1DAT6DOT05072019NAF-gad67GFPwta_012	217	229	446		n2DAT21DOT05072019NAF-gad67GFPwtb_013	60	2	62
n1DAT6DOT05072019NAF-gad67GFPwtb_007	163	184	347		n2DAT21DOT05072019NAF-gad67GFPwtb_006	38	7	45
n1DAT6DOT05072019NAF-gad67GFPwtb_008	49	54	103		n2DAT21DOT05072019NAF-gad67GFPwtb_009	43	2	45
n1DAT6DOT05072019NAF-gad67GFPwtb_013	106	105	211		n2DAT21DOT05072019NAF-gad67GFPwtb_017	21	1	22
n1DAT6DOT05072019NAF-gad67GFPwtb_015	47	49	96		n2DAT21DOT05072019NAF-gad67GFPwtb_014	14	2	16
n1DAT6DOT05072019NAF-gad67GFPwtb_009	31	27	58		n2DAT21DOT05072019NAF-gad67GFPwtb_003	32	5	37
n1DAT6DOT05072019NAF-gad67GFPwtb_004	11	15	26		n2DAT21DOT05072019NAF-gad67GFPwtd_004	6	0	6
n1DAT6DOT05072019NAF-gad67GFPwtb_014	7	9	16		n2DAT21DOT05072019NAF-gad67GFPwtb_004	4	0	4
n1DAT6DOT05072019NAF-gad67GFPwtb_010	5	1	6		n2DAT21DOT05072019NAF-gad67GFPwtd_002	2	1	3
total # of cells counted per brain	9620	8844	18464		n2DAT21DOT05072019NAF-gad67GFPwtb_008	4	0	4
total # of cells per brain	19240	17688	36928		n2DAT21DOT05072019NAF-gad67GFPwtd_003	1	0	1
% by label (reg or green)	0.521014	0.478986			total # of cells counted per brain	2968	281	3249
					total # of cells per brain	5936	562	6498
					% by label (reg or green)	0.913512	0.0864882
n3DAT6DOT05072019NAF-gad67GFPwtc_009	2	2	4		n4DAT21DOT05072019NAF-gad67GFPwtd_001	1	0	1
n3DAT6DOT05072019NAF-gad67GFPwtb_001	3	6	9		n4DAT21DOT05072019NAF-gad67GFPwtc_002	1	0	1
n3DAT6DOT05072019NAF-gad67GFPwtb_014	2	2	4		n4DAT21DOT05072019NAF-gad67GFPwtd_002	1	0	1
n3DAT6DOT05072019NAF-gad67GFPwtb_003	3	7	10		n4DAT21DOT05072019NAF-gad67GFPwtc_012	0	0	0
n3DAT6DOT05072019NAF-gad67GFPwtb_006	3	11	14		n4DAT21DOT05072019NAF-gad67GFPwtc_011	2	0	2
n3DAT6DOT05072019NAF-gad67GFPwtb_007	6	12	18		n4DAT21DOT05072019NAF-gad67GFPwtc_010	2	0	2
n3DAT6DOT05072019NAF-gad67GFPwtb_004	13	14	27		n4DAT21DOT05072019NAF-gad67GFPwtc_001	2	0	2
n3DAT6DOT05072019NAF-gad67GFPwtb_013	13	31	44		n4DAT21DOT05072019NAF-gad67GFPwtc_004	5	0	5
n3DAT6DOT05072019NAF-gad67GFPwtb_012	23	40	63		n4DAT21DOT05072019NAF-gad67GFPwtc_009	3	0	3
n3DAT6DOT05072019NAF-gad67GFPwtb_005	50	69	119		n4DAT21DOT05072019NAF-gad67GFPwtc_008	9	0	9
n3DAT6DOT05072019NAF-gad67GFPwtb_011	21	50	71		n4DAT21DOT05072019NAF-gad67GFPwtc_005	13	1	14
n3DAT6DOT05072019NAF-gad67GFPwta_010	89	103	192		n4DAT21DOT05072019NAF-gad67GFPwtc_003	15	2	17
n3DAT6DOT05072019NAF-gad67GFPwtb_010	63	81	144		n4DAT21DOT05072019NAF-gad67GFPwtc_007	6	1	7
n3DAT6DOT05072019NAF-gad67GFPwta_009	92	111	203		n4DAT21DOT05072019NAF-gad67GFPwtc_006	16	5	21
n3DAT6DOT05072019NAF-gad67GFPwta_006	129	172	301		n4DAT21DOT05072019NAF-gad67GFPwta_001	34	5	39
n3DAT6DOT05072019NAF-gad67GFPwta_012	214	260	474		n4DAT21DOT05072019NAF-gad67GFPwta_015	35	4	39
n3DAT6DOT05072019NAF-gad67GFPwtb_009	265	299	564		n4DAT21DOT05072019NAF-gad67GFPwta_014	43	3	46
n3DAT6DOT05072019NAF-gad67GFPwta_011	483	462	945		n4DAT21DOT05072019NAF-gad67GFPwta_002	53	11	64
n3DAT6DOT05072019NAF-gad67GFPwta_005	352	418	770		n4DAT21DOT05072019NAF-gad67GFPwta_003	74	4	78
n3DAT6DOT05072019NAF-gad67GFPwta_004	538	542	1080		n4DAT21DOT05072019NAF-gad67GFPwta_013	95	7	102
n3DAT6DOT05072019NAF-gad67GFPwtb_002	559	510	1069		n4DAT21DOT05072019NAF-gad67GFPwta_005	96	9	105
n3DAT6DOT05072019NAF-gad67GFPwtc_012	672	627	1299		n4DAT21DOT05072019NAF-gad67GFPwta_004	81	11	92
n3DAT6DOT05072019NAF-gad67GFPwtb_008	654	608	1262		n4DAT21DOT05072019NAF-gad67GFPwta_012	137	13	150
n3DAT6DOT05072019NAF-gad67GFPwtc_001	771	612	1383		n4DAT21DOT05072019NAF-gad67GFPwta_006	143	19	162
n3DAT6DOT05072019NAF-gad67GFPwta_007	853	747	1600		n4DAT21DOT05072019NAF-gad67GFPwta_007	179	14	193
n3DAT6DOT05072019NAF-gad67GFPwta_016	882	720	1602		n4DAT21DOT05072019NAF-gad67GFPwta_011	197	16	213
n3DAT6DOT05072019NAF-gad67GFPwta_013	819	687	1506		n4DAT21DOT05072019NAF-gad67GFPwta_010	215	23	238
n3DAT6DOT05072019NAF-gad67GFPwta_008	648	575	1223		n4DAT21DOT05072019NAF-gad67GFPwta_009	222	28	250
n3DAT6DOT05072019NAF-gad67GFPwta_003	637	560	1197		n4DAT21DOT05072019NAF-gad67GFPwta_008	202	26	228
n3DAT6DOT05072019NAF-gad67GFPwta_014	548	463	1011		n4DAT21DOT05072019NAF-gad67GFPwtb_010	207	18	225
n3DAT6DOT05072019NAF-gad67GFPwta_015	443	399	842		n4DAT21DOT05072019NAF-gad67GFPwtb_002	203	23	226
n3DAT6DOT05072019NAF-gad67GFPwta_001	390	396	786		n4DAT21DOT05072019NAF-gad67GFPwtb_011	152	24	176
n3DAT6DOT05072019NAF-gad67GFPwta_002	301	321	622		n4DAT21DOT05072019NAF-gad67GFPwtb_014	114	12	126
n3DAT6DOT05072019NAF-gad67GFPwta_017	200	202	402		n4DAT21DOT05072019NAF-gad67GFPwtb_017	143	10	153
n3DAT6DOT05072019NAF-gad67GFPwtc_002	243	234	477		n4DAT21DOT05072019NAF-gad67GFPwtb_015	133	14	147
n3DAT6DOT05072019NAF-gad67GFPwtc_004	122	140	262		n4DAT21DOT05072019NAF-gad67GFPwtb_003	113	12	125
n3DAT6DOT05072019NAF-gad67GFPwtc_003	69	117	186		n4DAT21DOT05072019NAF-gad67GFPwtb_001	129	6	135
n3DAT6DOT05072019NAF-gad67GFPwtc_007	50	73	123		n4DAT21DOT05072019NAF-gad67GFPwtb_005	76	11	87
n3DAT6DOT05072019NAF-gad67GFPwtc_014	33	40	73		n4DAT21DOT05072019NAF-gad67GFPwtb_013	54	8	62
n3DAT6DOT05072019NAF-gad67GFPwtc_015	17	32	49		n4DAT21DOT05072019NAF-gad67GFPwtb_004	52	3	55
n3DAT6DOT05072019NAF-gad67GFPwtc_005	7	12	19		n4DAT21DOT05072019NAF-gad67GFPwtb_006	47	4	51
n3DAT6DOT05072019NAF-gad67GFPwtc_011	15	17	32		n4DAT21DOT05072019NAF-gad67GFPwtb_009	32	2	34
n3DAT6DOT05072019NAF-gad67GFPwtc_013	19	21	40		n4DAT21DOT05072019NAF-gad67GFPwtb_018	24	1	25
n3DAT6DOT05072019NAF-gad67GFPwtc_006	1	5	6		n4DAT21DOT05072019NAF-gad67GFPwtb_019	22	1	23
n3DAT6DOT05072019NAF-gad67GFPwtc_008	1	5	6		n4DAT21DOT05072019NAF-gad67GFPwtb_016	9	1	10
n3DAT6DOT05072019NAF-gad67GFPwtc_010	5	12	17		n4DAT21DOT05072019NAF-gad67GFPwtb_020	7	1	8
total # of cells counted per brain	11323	10827	22150		n4DAT21DOT05072019NAF-gad67GFPwtb_007	4	0	4
total # of cells per brain	22646	21654	44300		n4DAT21DOT05072019NAF-gad67GFPwtb_008	12	0	12
% by label (reg or green)	0.511196	0.488804			n4DAT21DOT05072019NAF-gad67GFPwtb_012	1	0	1
					n4DAT21DOT05072019NAF-gad67GFPwtd_003	1	0	1
					total # of cells counted per brain	3417	353	3770
n5DAT6DOT05072019NAF-gad67GFPwtc_007	13	17	30		total # of cells per brain	6834	706	7540
n5DAT6DOT05072019NAF-gad67GFPwtc_008	24	39	63		% by label (reg or green)	0.906366	0.093634
n5DAT6DOT05072019NAF-gad67GFPwtc_009	50	51	101
n5DAT6DOT05072019NAF-gad67GFPwtb_014	108	103	211
n5DAT6DOT05072019NAF-gad67GFPwtb_002	110	112	222
n5DAT6DOT05072019NAF-gad67GFPwtb_015	85	54	139		n6DAT21DOT05072019NAF-gad67GFPwtd_005	42	4	46
n5DAT6DOT05072019NAF-gad67GFPwtb_013	183	169	352		n6DAT21DOT05072019NAF-gad67GFPwtd_001	77	9	86
n5DAT6DOT05072019NAF-gad67GFPwtb_001	267	264	531		n6DAT21DOT05072019NAF-gad67GFPwtd_002	62	7	69
n5DAT6DOT05072019NAF-gad67GFPwtb_016	306	279	585		n6DAT21DOT05072019NAF-gad67GFPwtd_003	67	9	76
n5DAT6DOT05072019NAF-gad67GFPwtb_007	329	322	651		n6DAT21DOT05072019NAF-gad67GFPwta_008	117	17	134
n5DAT6DOT05072019NAF-gad67GFPwtb_011	414	350	764		n6DAT21DOT05072019NAF-gad67GFPwtd_017	102	9	111
n5DAT6DOT05072019NAF-gad67GFPwtb_004	435	425	860		n6DAT21DOT05072019NAF-gad67GFPwta_009	120	24	144
n5DAT6DOT05072019NAF-gad67GFPwtb_005	519	455	974		n6DAT21DOT05072019NAF-gad67GFPwtd_016	138	16	154
n5DAT6DOT05072019NAF-gad67GFPwtb_010	621	530	1151		n6DAT21DOT05072019NAF-gad67GFPwta_010	132	24	156
n5DAT6DOT05072019NAF-gad67GFPwtb_009	628	516	1144		n6DAT21DOT05072019NAF-gad67GFPwta_007	167	18	185
n5DAT6DOT05072019NAF-gad67GFPwta_012	640	523	1163		n6DAT21DOT05072019NAF-gad67GFPwta_012	174	37	211
n5DAT6DOT05072019NAF-gad67GFPwtb_006	625	482	1107		n6DAT21DOT05072019NAF-gad67GFPwta_011	215	32	247
n5DAT6DOT05072019NAF-gad67GFPwtb_012	643	501	1144		n6DAT21DOT05072019NAF-gad67GFPwta_006	193	23	216
n5DAT6DOT05072019NAF-gad67GFPwta_008	655	562	1217		n6DAT21DOT05072019NAF-gad67GFPwta_013	255	24	279
n5DAT6DOT05072019NAF-gad67GFPwta_010	636	478	1114		n6DAT21DOT05072019NAF-gad67GFPwta_005	289	38	327
n5DAT6DOT05072019NAF-gad67GFPwtb_003	435	357	792		n6DAT21DOT05072019NAF-gad67GFPwta_004	242	30	272
n5DAT6DOT05072019NAF-gad67GFPwta_005	513	385	898		n6DAT21DOT05072019NAF-gad67GFPwta_014	308	36	344
n5DAT6DOT05072019NAF-gad67GFPwta_009	393	319	712		n6DAT21DOT05072019NAF-gad67GFPwtb_007	301	30	331
n5DAT6DOT05072019NAF-gad67GFPwta_001	375	340	715		n6DAT21DOT05072019NAF-gad67GFPwta_002	295	39	334
n5DAT6DOT05072019NAF-gad67GFPwta_011	277	232	509		n6DAT21DOT05072019NAF-gad67GFPwta_015	317	38	355
n5DAT6DOT05072019NAF-gad67GFPwtb_008	236	170	406		n6DAT21DOT05072019NAF-gad67GFPwta_001	347	41	388
n5DAT6DOT05072019NAF-gad67GFPwtc_013	218	190	408		n6DAT21DOT05072019NAF-gad67GFPwta_003	273	34	307
n5DAT6DOT05072019NAF-gad67GFPwta_007	176	184	360		n6DAT21DOT05072019NAF-gad67GFPwtb_012	273	36	309
n5DAT6DOT05072019NAF-gad67GFPwta_004	145	131	276		n6DAT21DOT05072019NAF-gad67GFPwtb_011	254	41	295
n5DAT6DOT05072019NAF-gad67GFPwta_006	82	82	164		n6DAT21DOT05072019NAF-gad67GFPwtb_009	247	16	263
n5DAT6DOT05072019NAF-gad67GFPwta_002	76	109	185		n6DAT21DOT05072019NAF-gad67GFPwtb_010	169	15	184
n5DAT6DOT05072019NAF-gad67GFPwta_013	69	60	129		n6DAT21DOT05072019NAF-gad67GFPwtb_005	164	18	182
n5DAT6DOT05072019NAF-gad67GFPwta_015	27	55	82		n6DAT21DOT05072019NAF-gad67GFPwtb_006	151	21	172
n5DAT6DOT05072019NAF-gad67GFPwtc_001	25	42	67		n6DAT21DOT05072019NAF-gad67GFPwtb_008	122	3	125
n5DAT6DOT05072019NAF-gad67GFPwta_014	21	30	51		n6DAT21DOT05072019NAF-gad67GFPwtb_004	134	11	145
n5DAT6DOT05072019NAF-gad67GFPwta_003	17	19	36		n6DAT21DOT05072019NAF-gad67GFPwtb_003	113	11	124
n5DAT6DOT05072019NAF-gad67GFPwtc_011	13	19	32		n6DAT21DOT05072019NAF-gad67GFPwtc._008	89	5	94
n5DAT6DOT05072019NAF-gad67GFPwtc_002	9	19	28		n6DAT21DOT05072019NAF-gad67GFPwtb_014	64	7	69
n5DAT6DOT05072019NAF-gad67GFPwtc_010	4	3	7		n6DAT21DOT05072019NAF-gad67GFPwtc._004	80	5	85
n5DAT6DOT05072019NAF-gad67GFPwtc_004	11	8	19		n6DAT21DOT05072019NAF-gad67GFPwtc._007	66	8	74
n5DAT6DOT05072019NAF-gad67GFPwtc_005	10	7	17		n6DAT21DOT05072019NAF-gad67GFPwtb_002	66	10	76
n5DAT6DOT05072019NAF-gad67GFPwtc_003	4	1	5		n6DAT21DOT05072019NAF-gad67GFPwtb_013	54	1	56
n5DAT6DOT05072019NAF-gad67GFPwtc_012	1	1	2		n6DAT21DOT05072019NAF-gad67GFPwtb_001	53	2	55
n5DAT6DOT05072019NAF-gad67GFPwtc_006	2	2	4		n6DAT21DOT05072019NAF-gad67GFPwtc._015	44	4	48
total # of cells counted per brain	10430	8997	19427		n6DAT21DOT05072019NAF-gad67GFPwtc._017	31	3	34
total # of cells per brain	20860	17994	38854		n6DAT21DOT05072019NAF-gad67GFPwtc._010	43	4	47
% by label (reg or green)	0.536882	0.463118			n6DAT21DOT05072019NAF-gad67GFPwtc._005	33	0	33
					n6DAT21DOT05072019NAF-gad67GFPwtc._003	19	2	21
					n6DAT21DOT05072019NAF-gad67GFPwtc._006	26	1	27
					n6DAT21DOT05072019NAF-gad67GFPwtc._013	19	2	21
n7DAT6DOT05072019NAF-gad67GFPwtc_003	3	2	5		n6DAT21DOT05072019NAF-gad67GFPwtc._001	17	1	18
n7DAT6DOT05072019NAF-gad67GFPwtc_004	5	1	6		n6DAT21DOT05072019NAF-gad67GFPwtc._009	16	2	18
n7DAT6DOT05072019NAF-gad67GFPwta_003	0	3	3		n6DAT21DOT05072019NAF-gad67GFPwtc._002	9	0	9
n7DAT6DOT05072019NAF-gad67GFPwta_016	4	3	7		n6DAT21DOT05072019NAF-gad67GFPwtd_007	3	1	4
n7DAT6DOT05072019NAF-gad67GFPwta_007	5	5	10		n6DAT21DOT05072019NAF-gad67GFPwtc._012	8	2	10
n7DAT6DOT05072019NAF-gad67GFPwtc_001	6	6	12		n6DAT21DOT05072019NAF-gad67GFPwtd_009	10	2	12
n7DAT6DOT05072019NAF-gad67GFPwta1_007	4	12	16		n6DAT21DOT05072019NAF-gad67GFPwtd_006	4	1	5
n7DAT6DOT05072019NAF-gad67GFPwtc_002	36	35	71		n6DAT21DOT05072019NAF-gad67GFPwtc._016	6	0	6
n7DAT6DOT05072019NAF-gad67GFPwta_002	8	12	20		n6DAT21DOT05072019NAF-gad67GFPwtc._011	6	1	7
n7DAT6DOT05072019NAF-gad67GFPwta_017	23	20	43		n6DAT21DOT05072019NAF-gad67GFPwtd_010	2	0	2
n7DAT6DOT05072019NAF-gad67GFPwta1_005	22	43	65		n6DAT21DOT05072019NAF-gad67GFPwtd_011	2	0	2
n7DAT6DOT05072019NAF-gad67GFPwta_004	43	49	92		n6DAT21DOT05072019NAF-gad67GFPwtd_008	4	0	4
n7DAT6DOT05072019NAF-gad67GFPwta_008	55	83	138		n6DAT21DOT05072019NAF-gad67GFPwtd_004	1	0	1
n7DAT6DOT05072019NAF-gad67GFPwta_006	172	175	347		n6DAT21DOT05072019NAF-gad67GFPwtc._014	28	1	29
n7DAT6DOT05072019NAF-gad67GFPwtb_008	118	105	223		n6DAT21DOT05072019NAF-gad67GFPwtd_012	7	0	7
n7DAT6DOT05072019NAF-gad67GFPwta_005	215	266	481		n6DAT21DOT05072019NAF-gad67GFPwtd_013	4	1	5
n7DAT6DOT05072019NAF-gad67GFPwta1_001	304	333	637		n6DAT21DOT05072019NAF-gad67GFPwtd_014	2	0	2
n7DAT6DOT05072019NAF-gad67GFPwta_001	368	473	841		n6DAT21DOT05072019NAF-gad67GFPwtd_015	5	1	6
n7DAT6DOT05072019NAF-gad67GFPwta1_004	509	502	1011		total # of cells counted per brain	6681	778	7458
n7DAT6DOT05072019NAF-gad67GFPwtb_005	936	872	1808		total # of cells per brain	13362	1556	14916
n7DAT6DOT05072019NAF-gad67GFPwtb_018	1106	959	2065		% by label (reg or green)	0.895817	0.104318
n7DAT6DOT05072019NAF-gad67GFPwta1_003	792	663	1455
n7DAT6DOT05072019NAF-gad67GFPwtb_006	1099	973	2072
n7DAT6DOT05072019NAF-gad67GFPwta1_002	1259	1053	2312		n8DAT21DOT05072019NAF-gad67GFPwtc_004	1	0	1
n7DAT6DOT05072019NAF-gad67GFPwtb_009	1338	997	2335		n8DAT21DOT05072019NAF-gad67GFPwtc_005	1	0	1
n7DAT6DOT05072019NAF-gad67GFPwtb_007	1110	962	2072		n8DAT21DOT05072019NAF-gad67GFPwtc_006	2	0	2
n7DAT6DOT05072019NAF-gad67GFPwtb_019	1038	843	1881		n8DAT21DOT05072019NAF-gad67GFPwtb_005	2	1	3
n7DAT6DOT05072019NAF-gad67GFPwtb_020	779	806	1585		n8DAT21DOT05072019NAF-gad67GFPwtb_006	3	1	4
n7DAT6DOT05072019NAF-gad67GFPwtb_001	839	728	1567		n8DAT21DOT05072019NAF-gad67GFPwtc_003	9	1	10
n7DAT6DOT05072019NAF-gad67GFPwtb_021	793	692	1485		n8DAT21DOT05072019NAF-gad67GFPwtc_002	5	1	6
n7DAT6DOT05072019NAF-gad67GFPwtb_010	586	555	1141		n8DAT21DOT05072019NAF-gad67GFPwtc_001	9	0	9
n7DAT6DOT05072019NAF-gad67GFPwtb_017	627	453	1080		n8DAT21DOT05072019NAF-gad67GFPwtc_007	19	1	20
n7DAT6DOT05072019NAF-gad67GFPwtb_002	389	370	759		n8DAT21DOT05072019NAF-gad67GFPwtc_008	24	5	29
n7DAT6DOT05072019NAF-gad67GFPwtb_003	416	416	832		n8DAT21DOT05072019NAF-gad67GFPwtc_009	16	0	16
n7DAT6DOT05072019NAF-gad67GFPwtb_004	268	275	543		n8DAT21DOT05072019NAF-gad67GFPwtc_010	45	2	47
n7DAT6DOT05072019NAF-gad67GFPwtb_011	184	195	379		n8DAT21DOT05072019NAF-gad67GFPwtc_011	54	0	54
n7DAT6DOT05072019NAF-gad67GFPwtb_013	99	121	220		n8DAT21DOT05072019NAF-gad67GFPwtb_004	86	4	90
n7DAT6DOT05072019NAF-gad67GFPwtb_012	65	92	157		n8DAT21DOT05072019NAF-gad67GFPwtb_002	81	9	90
n7DAT6DOT05072019NAF-gad67GFPwtb_014	63	92	155		n8DAT21DOT05072019NAF-gad67GFPwtb_003	88	8	96
n7DAT6DOT05072019NAF-gad67GFPwtb_015	47	70	117		n8DAT21DOT05072019NAF-gad67GFPwtb_001	102	7	109
n7DAT6DOT05072019NAF-gad67GFPwtb_016	4	9	13		n8DAT21DOT05072019NAF-gad67GFPwtb_007	166	5	171
n7DAT6DOT05072019NAF-gad67GFPwta1_006	12	10	22		n8DAT21DOT05072019NAF-gad67GFPwtb_014	151	4	155
total # of cells counted per brain	15749	14334	30083		n8DAT21DOT05072019NAF-gad67GFPwtb_008	149	17	166
total # of cells per brain	31498	28668	60166		n8DAT21DOT05072019NAF-gad67GFPwtb_009	173	16	189
% by label (reg or green)	0.523518	0.476482			n8DAT21DOT05072019NAF-gad67GFPwtb_010	239	19	258
					n8DAT21DOT05072019NAF-gad67GFPwtb_011	264	20	284
					n8DAT21DOT05072019NAF-gad67GFPwtb_013	268	18	286
					n8DAT21DOT05072019NAF-gad67GFPwta_001	333	44	377
n9DAT6DOT05072019NAF-gad67GFPwtb_012	1	1	2		n8DAT21DOT05072019NAF-gad67GFPwtb_012	338	39	377
n9DAT6DOT05072019NAF-gad67GFPwtb_010	3	0	3		n8DAT21DOT05072019NAF-gad67GFPwta_002	303	31	334
n9DAT6DOT05072019NAF-gad67GFPwtb_013	6	6	12		n8DAT21DOT05072019NAF-gad67GFPwta_003	271	26	297
n9DAT6DOT05072019NAF-gad67GFPwtb_009	12	9	21		n8DAT21DOT05072019NAF-gad67GFPwta_004	243	19	262
n9DAT6DOT05072019NAF-gad67GFPwtb_007	10	10	20		n8DAT21DOT05072019NAF-gad67GFPwta_005	232	14	246
n9DAT6DOT05072019NAF-gad67GFPwtb_004	18	21	39		n8DAT21DOT05072019NAF-gad67GFPwta_007	214	17	231
n9DAT6DOT05072019NAF-gad67GFPwta_004	25	28	53		n8DAT21DOT05072019NAF-gad67GFPwta_008	177	11	188
n9DAT6DOT05072019NAF-gad67GFPwtb_002	46	35	81		n8DAT21DOT05072019NAF-gad67GFPwta_006	198	21	219
n9DAT6DOT05072019NAF-gad67GFPwtb_005	93	104	197		n8DAT21DOT05072019NAF-gad67GFPwta_016	160	12	172
n9DAT6DOT05072019NAF-gad67GFPwtb_008	75	70	145		n8DAT21DOT05072019NAF-gad67GFPwta_015	116	9	125
n9DAT6DOT05072019NAF-gad67GFPwtb_006	64	105	169		n8DAT21DOT05072019NAF-gad67GFPwta_014	116	8	124
n9DAT6DOT05072019NAF-gad67GFPwtb_011	216	237	453		n8DAT21DOT05072019NAF-gad67GFPwta_012	116	5	121
n9DAT6DOT05072019NAF-gad67GFPwtb_003	369	401	770		n8DAT21DOT05072019NAF-gad67GFPwta_013	69	3	72
n9DAT6DOT05072019NAF-gad67GFPwtb_001	578	535	1113		n8DAT21DOT05072019NAF-gad67GFPwta_011	84	10	94
n9DAT6DOT05072019NAF-gad67GFPwta_002	668	681	1349		n8DAT21DOT05072019NAF-gad67GFPwta_009	52	5	57
n9DAT6DOT05072019NAF-gad67GFPwta_003	575	549	1124		n8DAT21DOT05072019NAF-gad67GFPwtc_012	54	3	57
n9DAT6DOT05072019NAF-gad67GFPwta_014	878	854	1732		n8DAT21DOT05072019NAF-gad67GFPwtd_001	38	4	42
n9DAT6DOT05072019NAF-gad67GFPwta_005	895	775	1670		n8DAT21DOT05072019NAF-gad67GFPwta_010	30	1	31
n9DAT6DOT05072019NAF-gad67GFPwta_001	800	835	1635		n8DAT21DOT05072019NAF-gad67GFPwtd_012	21	1	22
n9DAT6DOT05072019NAF-gad67GFPwta_006	921	876	1797		n8DAT21DOT05072019NAF-gad67GFPwtd_010	20	1	21
n9DAT6DOT05072019NAF-gad67GFPwta_015	1072	891	1963		n8DAT21DOT05072019NAF-gad67GFPwtd_011	16	3	19
n9DAT6DOT05072019NAF-gad67GFPwta_007	947	696	1643		n8DAT21DOT05072019NAF-gad67GFPwtd_002	4	0	4
n9DAT6DOT05072019NAF-gad67GFPwta_008	799	801	1600		n8DAT21DOT05072019NAF-gad67GFPwtd_008	4	1	5
n9DAT6DOT05072019NAF-gad67GFPwta_009	782	694	1476		n8DAT21DOT05072019NAF-gad67GFPwtd_009	6	0	6
n9DAT6DOT05072019NAF-gad67GFPwtc_011	541	545	1086		n8DAT21DOT05072019NAF-gad67GFPwtd_007	7	2	9
n9DAT6DOT05072019NAF-gad67GFPwta_012	755	658	1413		n8DAT21DOT05072019NAF-gad67GFPwtd_004	1	0	1
n9DAT6DOT05072019NAF-gad67GFPwta_011	604	578	1182		n8DAT21DOT05072019NAF-gad67GFPwtd_003	1	0	1
n9DAT6DOT05072019NAF-gad67GFPwta_010	410	482	892		n8DAT21DOT05072019NAF-gad67GFPwtd_006	4	1	5
n9DAT6DOT05072019NAF-gad67GFPwta_013	636	588	1224		n8DAT21DOT05072019NAF-gad67GFPwtd_005	1	0	1
n9DAT6DOT05072019NAF-gad67GFPwtc_014	383	309	692		total # of cells counted per brain	5186	430	5616
n9DAT6DOT05072019NAF-gad67GFPwtc_013	215	213	428		total # of cells per brain	10372	860	11232
n9DAT6DOT05072019NAF-gad67GFPwtc_012	180	183	363		% by label (reg or green)	0.923433	0.076567
n9DAT6DOT05072019NAF-gad67GFPwtc_002	171	162	333
n9DAT6DOT05072019NAF-gad67GFPwtc_009	47	88	135
n9DAT6DOT05072019NAF-gad67GFPwtc_001	30	23	53		n10DAT21DOT05072019NAF-gad67GFPwta_001	217	14	231
n9DAT6DOT05072019NAF-gad67GFPwtc_008	32	32	64		n10DAT21DOT05072019NAF-gad67GFPwta_002	95	3	98
n9DAT6DOT05072019NAF-gad67GFPwtc_006	7	6	13		n10DAT21DOT05072019NAF-gad67GFPwta_003	120	8	128
n9DAT6DOT05072019NAF-gad67GFPwtc_010	8	9	17		n10DAT21DOT05072019NAF-gad67GFPwta_004	126	12	138
n9DAT6DOT05072019NAF-gad67GFPwtc_003	6	1	7		n10DAT21DOT05072019NAF-gad67GFPwta_005	188	18	206
n9DAT6DOT05072019NAF-gad67GFPwtc_007	2	2	4		n10DAT21DOT05072019NAF-gad67GFPwta_006	238	25	263
n9DAT6DOT05072019NAF-gad67GFPwtc_005	1	0	1		n10DAT21DOT05072019NAF-gad67GFPwta_007	287	25	312
n9DAT6DOT05072019NAF-gad67GFPwtc_004	2	0	2		n10DAT21DOT05072019NAF-gad67GFPwta_008	179	14	193
total # of cells counted per brain	13883	13093	26976		n10DAT21DOT05072019NAF-gad67GFPwta_009	239	27	266
total # of cells per brain	27766	26186	53952		n10DAT21DOT05072019NAF-gad67GFPwta_010	260	24	284
% by label (reg or green)	0.514643	0.485357			n10DAT21DOT05072019NAF-gad67GFPwta_011	234	23	257
					n10DAT21DOT05072019NAF-gad67GFPwta_012	211	21	232
					n10DAT21DOT05072019NAF-gad67GFPwta_013	230	16	246
					n10DAT21DOT05072019NAF-gad67GFPwta_014	169	11	180
					n10DAT21DOT05072019NAF-gad67GFPwtb_001	21	1	22
					n10DAT21DOT05072019NAF-gad67GFPwtb_002	2	1	3
					n10DAT21DOT05072019NAF-gad67GFPwtb_003	15	3	18
					n10DAT21DOT05072019NAF-gad67GFPwtb_004	196	13	209
					n10DAT21DOT05072019NAF-gad67GFPwtb_005	62	4	66
					n10DAT21DOT05072019NAF-gad67GFPwtb_006	12	3	15
					n10DAT21DOT05072019NAF-gad67GFPwtb_007	189	23	212
					n10DAT21DOT05072019NAF-gad67GFPwtb_008	3	1	4
					n10DAT21DOT05072019NAF-gad67GFPwtb_009	82	8	90
					n10DAT21DOT05072019NAF-gad67GFPwtb_010	49	1	50
					n10DAT21DOT05072019NAF-gad67GFPwtb_011	11	2	13
					n10DAT21DOT05072019NAF-gad67GFPwtb_012	44	3	47
					n10DAT21DOT05072019NAF-gad67GFPwtb_013	47	4	51
					n10DAT21DOT05072019NAF-gad67GFPwtc_001	3	1	4
					n10DAT21DOT05072019NAF-gad67GFPwtc_002	93	8	101
					n10DAT21DOT05072019NAF-gad67GFPwtc_003	39	6	45
					n10DAT21DOT05072019NAF-gad67GFPwtc_004	6	1	7
					n10DAT21DOT05072019NAF-gad67GFPwtc_005	39	1	40
					n10DAT21DOT05072019NAF-gad67GFPwtc_006	115	12	127
					n10DAT21DOT05072019NAF-gad67GFPwtc_007	78	4	82
					n10DAT21DOT05072019NAF-gad67GFPwtc_008	96	7	103
					n10DAT21DOT05072019NAF-gad67GFPwtc_009	44	4	48
					n10DAT21DOT05072019NAF-gad67GFPwtc_010	43	7	50
					n10DAT21DOT05072019NAF-gad67GFPwtc_011	19	2	21
					n10DAT21DOT05072019NAF-gad67GFPwtc_012	17	2	19
					n10DAT21DOT05072019NAF-gad67GFPwtc_013	3	0	3
					n10DAT21DOT05072019NAF-gad67GFPwtc_014	5	1	6
					n10DAT21DOT05072019NAF-gad67GFPwtd_001	1	0	1
					n10DAT21DOT05072019NAF-gad67GFPwtd_002	67	2	69
					n10DAT21DOT05072019NAF-gad67GFPwtd_003	5	2	7
					n10DAT21DOT05072019NAF-gad67GFPwtd_004	2	1	3
					n10DAT21DOT05072019NAF-gad67GFPwtd_005	3	0	3
					total # of cells counted per brain	4204	369	4573
					total # of cells per brain	8408	738	9146
					% by label (reg or green)	0.919309	0.080691

## Sheet: Figure 10 D 
	Figure 10E source data. Loss of function of Pcdhg from Nkx2.1-derived cIN precursor cells dramatically decreases their survival during the period of programmed cell death.
	Figure 10E
	6 DAT		21 DAT
	# of transplant-derived cells per brain
	GFP	tdTomato	GFP	tdTomato
	19240	17688	5936	562
	22646	21654	6834	706
	20860	17994	13362	1556
	31498	28668	10372	860
	27766	26186	8408	738
	mean # of transplant-derived cells
	GFP	tdTomato	GFP	tdTomato
	24402	22438	8982.4	884.4
	relative change (%) from 6 to 21 DAT
		GFP+	tomato+
		-0.631899	-0.960585
	Figure 10E source data. Quantifications of all transplanted cells (GFP and tdTomato labeled) in cortex of recipient mice at 6 and 21 days after transplantation (DAT). MGE precursors cells were derived from Gad1-GFP (WT Pcdhg) and Nkx2.1Cre;Ai14;Pcdhgfcon3/fcon3 (mutant Pcdhg) E13.5 embryos. Five brains were analyzed per timepoint, and the average relative change from 6 to 21 DAT was computer in t…
