# Supplementary material for: Clustered gamma-protocadherins regulate cortical interneuron programmed cell death
Source: eLife. 2020 Jul 7;9:e55374. doi: 10.7554/eLife.55374 (PMC7373431; doi:10.7554/eLife.55374)
Supplement: Figure 11—source data 1. [file elife-55374-fig11-data1.xlsx]

## Sheet: Figure 11B′
Figure 11B' source data. Deletion of Pcdhga1, Pcdhga2 and Pcdhga3 isoforms from transplanted cIN precursors does not affect their survival.
	6 DAT								21 DAT
			number of GFP+ or tdTomato + cells per section		total cell number per section	Fraction of GFP+ or tdTomato+ cells per section					number of GFP+ or tdTomato + cells per section		total cell number per section	Fraction of GFP+ or tdTomato+ cells per section
	brain secion ID/mouse number	DAT	GFP+ (WT Pcdhg)	tomato+ (Pcdhgtako/tako)	total	% green	% red		brain secion ID/mouse number	DAT	GFP+ (WT Pcdhg)	tomato+ (Pcdhgtako/tako)	total	% green	% red
	cortex- N1DAT6DOT090419NAG_001	6	170	164	334	0.508982	0.491018		cortex-N2DAT21DOT9419NAG_001	21	31	30	61	0.508197	0.491803
	cortex- N1DAT6DOT090419NAG_002	6	171	179	350	0.488571	0.511429		cortex-N2DAT21DOT9419NAG_002	21	47	39	86	0.546512	0.453488
	cortex- N1DAT6DOT090419NAG_003	6	213	165	378	0.563492	0.436508		cortex-N2DAT21DOT9419NAG_003	21	63	58	121	0.520661	0.479339
	cortex- N1DAT6DOT090419NAG_004	6	14	10	24	0.583333	0.416667		cortex-N2DAT21DOT9419NAG_004	21	37	17	54	0.685185	0.314815
	cortex- N1DAT6DOT090419NAG_005	6	38	35	73	0.520548	0.479452		cortex-N2DAT21DOT9419NAG_005	21	30	25	55	0.545455	0.454545
	cortex- N1DAT6DOT090419NAG_006	6	39	49	88	0.443182	0.556818		cortex-N2DAT21DOT9419NAG_006	21	37	32	69	0.536232	0.463768
	cortex- N1DAT6DOT090419NAG_007	6	25	23	48	0.520833	0.479167		cortex-N2DAT21DOT9419NAG_007	21	32	41	73	0.438356	0.561644
	cortex- N1DAT6DOT090419NAG_008	6	56	42	98	0.571429	0.428571		cortex-N2DAT21DOT9419NAG_008	21	53	44	97	0.546392	0.453608
	cortex- N1DAT6DOT090419NAG_009	6	125	126	251	0.498008	0.501992		cortex-N2DAT21DOT9419NAG_009	21	19	24	43	0.44186	0.55814
	cortex- N1DAT6DOT090419NAG_010	6	99	84	183	0.540984	0.459016		cortex-N2DAT21DOT9419NAG_010	21	27	22	49	0.55102	0.44898
	total # of cells counted		950	877	1827				total # of cells counted		376	332	708
	mean survival fraction (% ) by brain slice					0.523936	0.476064		mean survival fraction (% ) by brain slice					0.531987	0.468013
	cortex- N3DAT6DOT090419NAG_001	6	246	187	433	0.568129	0.431871		cortex-N6DAT21DOT9419NAG_001	21	139	110	249	0.558233	0.441767
	cortex- N3DAT6DOT090419NAG_002	6	293	222	515	0.568932	0.431068		cortex-N6DAT21DOT9419NAG_002	21	266	201	467	0.569593	0.430407
	cortex- N3DAT6DOT090419NAG_003	6	371	166	537	0.690875	0.309125		cortex-N6DAT21DOT9419NAG_003	21	242	154	396	0.611111	0.388889
	cortex- N3DAT6DOT090419NAG_004	6	261	151	412	0.633495	0.366505		cortex-N6DAT21DOT9419NAG_004	21	142	134	276	0.514493	0.485507
	cortex- N3DAT6DOT090419NAG_005	6	82	71	153	0.535948	0.464052		cortex-N6DAT21DOT9419NAG_005	21	273	175	448	0.609375	0.390625
	cortex- N3DAT6DOT090419NAG_006	6	49	37	86	0.569767	0.430233		cortex-N6DAT21DOT9419NAG_006	21	175	155	330	0.530303	0.469697
	cortex- N3DAT6DOT090419NAG_007	6	48	34	82	0.585366	0.414634		cortex-N6DAT21DOT9419NAG_007	21	304	205	509	0.59725	0.40275
	cortex- N3DAT6DOT090419NAG_008	6	429	295	724	0.592541	0.407459		cortex-N6DAT21DOT9419NAG_008	21	291	196	487	0.597536	0.402464
	cortex- N3DAT6DOT090419NAG_009	6	357	266	623	0.573034	0.426966		cortex-N6DAT21DOT9419NAG_009	21	173	127	300	0.576667	0.423333
	cortex- N3DAT6DOT090419NAG_010	6	438	267	705	0.621277	0.378723		cortex-N6DAT21DOT9419NAG_010	21	171	107	278	0.615108	0.384892
	total # of cells counted		2574	1696	4270				total # of cells counted		2176	1564	3740
	mean survival fraction (% ) by brain slice					0.593936	0.406064		mean survival fraction (% ) by brain slice					0.577967	0.422033
	cortex- N5DAT6DOT090419NAG_001	6	32	36	68	0.470588	0.529412		cortex-N8DAT21DOT9419NAG_001	21	202	159	361	0.559557	0.440443
	cortex- N5DAT6DOT090419NAG_002	6	36	33	69	0.521739	0.478261		cortex-N8DAT21DOT9419NAG_002	21	105	83	188	0.558511	0.441489
	cortex- N5DAT6DOT090419NAG_003	6	31	24	55	0.563636	0.436364		cortex-N8DAT21DOT9419NAG_003	21	108	108	216	0.5	0.5
	cortex- N5DAT6DOT090419NAG_004	6	18	18	36	0.5	0.5		cortex-N8DAT21DOT9419NAG_004	21	7	6	13	0.538462	0.461538
	cortex- N5DAT6DOT090419NAG_005	6	102	70	172	0.593023	0.406977		cortex-N8DAT21DOT9419NAG_005	21	4	6	10	0.4	0.6
	cortex- N5DAT6DOT090419NAG_006	6	21	22	43	0.488372	0.511628		cortex-N8DAT21DOT9419NAG_006	21	2	2	4	0.5	0.5
	cortex- N5DAT6DOT090419NAG_007	6	62	60	122	0.508197	0.491803		cortex-N8DAT21DOT9419NAG_007	21	24	19	43	0.55814	0.44186
	cortex- N5DAT6DOT090419NAG_008	6	87	66	153	0.568627	0.431373		cortex-N8DAT21DOT9419NAG_008	21	141	133	274	0.514599	0.485401
	cortex- N5DAT6DOT090419NAG_009	6	67	45	112	0.598214	0.401786		cortex-N8DAT21DOT9419NAG_009	21	208	150	358	0.581006	0.418994
	cortex- N5DAT6DOT090419NAG_010	6	74	38	112	0.660714	0.339286		cortex-N8DAT21DOT9419NAG_010	21	276	218	494	0.558704	0.441296
	total # of cells counted		530	412	942				total # of cells counted		1077	884	1961
	mean survival fraction (% ) by brain slice					0.547311	0.452689		mean survival fraction (% ) by brain slice					0.526898	0.473102
	cortex- N7DAT6DOT090419NAG_001	6	97	49	146	0.664384	0.335616		cortex-N10DAT21DOT9419NAG_001	21	182	131	313	0.58147	0.41853
	cortex- N7DAT6DOT090419NAG_002	6	133	102	235	0.565957	0.434043		cortex-N10DAT21DOT9419NAG_002	21	139	101	240	0.579167	0.420833
	cortex- N7DAT6DOT090419NAG_003	6	99	51	150	0.66	0.34		cortex-N10DAT21DOT9419NAG_003	21	151	97	248	0.608871	0.391129
	cortex- N7DAT6DOT090419NAG_004	6	75	49	124	0.604839	0.395161		cortex-N10DAT21DOT9419NAG_004	21	26	22	48	0.541667	0.458333
	cortex- N7DAT6DOT090419NAG_005	6	32	33	65	0.492308	0.507692		cortex-N10DAT21DOT9419NAG_005	21	59	40	99	0.59596	0.40404
	cortex- N7DAT6DOT090419NAG_006	6	53	43	96	0.552083	0.447917		cortex-N10DAT21DOT9419NAG_006	21	21	18	39	0.538462	0.461538
	cortex- N7DAT6DOT090419NAG_007	6	146	105	251	0.581673	0.418327		cortex-N10DAT21DOT9419NAG_007	21	10	16	26	0.384615	0.615385
	cortex- N7DAT6DOT090419NAG_008	6	194	112	306	0.633987	0.366013		cortex-N10DAT21DOT9419NAG_008	21	26	22	48	0.541667	0.458333
	cortex- N7DAT6DOT090419NAG_009	6	111	82	193	0.57513	0.42487		cortex-N10DAT21DOT9419NAG_009	21	87	66	153	0.568627	0.431373
	cortex- N7DAT6DOT090419NAG_010	6	23	17	40	0.575	0.425		cortex-N10DAT21DOT9419NAG_010	21	232	138	370	0.627027	0.372973
	total # of cells counted		963	643	1606				total # of cells counted		933	651	1584
	mean survival fraction (% ) by brain slice					0.590536	0.409464		mean survival fraction (% ) by brain slice					0.556753	0.443247
	Figure 11B'. Quantifications of transplanted cells ( labeled with GFP or tdTomato) in cortex of recipient mice at 6 and 21 days after transplantation (DAT). MGE precursors cells were derived from Gad1-GFP (GFP+,WT Pcdhg) and Nkx2.1Cre;Ai14;Pcdhgtako/tako(tdTomato+, Pcdha1, Pcdha12 and Pcdha3 deleted) E13.5 embryos, and equal proportions of GFP and tdTomato labeled cells were mixed before being co…

## Sheet: Figure 11C′
Figure 11B' source data. Deletion of Pcdhc3, Pcdhc4 and Pcdhc5 isoforms from transplanted cIN precursors negatively affects their survival to levels comparable to removal of entire Pcdhg gene cluster.
	6 DAT								21 DAT
			number of GFP+ or tdTomato + cells per section		total cell number per section	Fraction of GFP+ or tdTomato+ cells per section					number of GFP+ or tdTomato + cells per section		total cell number per section	Fraction of GFP+ or tdTomato+ cells per section
	brain secion ID/mouse number	DAT	GFP+ (WT Pcdhg)	tomato+ (Pcdhgtcko/tcko)	total	% green	% red		brain secion ID/mouse number	DAT	GFP+ (WT Pcdhg)	tomato+ (Pcdhgtcko/tcko)	total	% green	% red
	N2DAT6DOT73118NAGC_001	6	260	256	516	0.503876	0.496124		N3DAT21DOT73118NAGC_001	21	21	4	25	0.84	0.16
	N2DAT6DOT73118NAGC_002	6	294	264	558	0.526882	0.473118		N3DAT21DOT73118NAGC_002	21	15	6	21	0.714286	0.285714
	N2DAT6DOT73118NAGC_003	6	2	2	4	0.5	0.5		N3DAT21DOT73118NAGC_003	21	17	4	21	0.809524	0.190476
	N2DAT6DOT73118NAGC_004	6	34	41	75	0.453333	0.546667		N3DAT21DOT73118NAGC_004	21	10	0	10	1	0
	N2DAT6DOT73118NAGC_005	6	8	11	19	0.421053	0.578947		N3DAT21DOT73118NAGC_005	21	47	10	57	0.824561	0.175439
	N2DAT6DOT73118NAGC_006	6	2	2	4	0.5	0.5		N3DAT21DOT73118NAGC_006	21	1	0	1	1	0
	N2DAT6DOT73118NAGC_007	6	70	70	140	0.5	0.5		N3DAT21DOT73118NAGC_007	21	29	9	38	0.763158	0.236842
	N2DAT6DOT73118NAGC_008	6	5	1	6	0.833333	0.166667		N3DAT21DOT73118NAGC_008	21	25	3	28	0.892857	0.107143
	N2DAT6DOT73118NAGC_009	6	159	160	319	0.498433	0.501567		N3DAT21DOT73118NAGC_009	21	2	0	2	1	0
	N2DAT6DOT73118NAGC_010	6	171	158	329	0.519757	0.480243		N3DAT21DOT73118NAGC_010	21	19	6	25	0.76	0.24
	total # of cells counted		1005	965	1970				total # of cells counted		186	42	228
	mean survival fraction (% ) by brain slice					0.525667	0.474333		mean survival fraction (% ) by brain slice					0.860439	0.139561
	N4DAT6DOT73118NAGC_001	6	62	50	112	0.553571	0.446429		N5DAT21DOT73118NAGC_001	21	63	11	74	0.851351	0.148649
	N4DAT6DOT73118NAGC_002	6	141	160	301	0.468439	0.531561		N5DAT21DOT73118NAGC_002	21	75	21	96	0.78125	0.21875
	N4DAT6DOT73118NAGC_003	6	30	21	51	0.588235	0.411765		N5DAT21DOT73118NAGC_003	21	22	2	24	0.916667	0.0833333
	N4DAT6DOT73118NAGC_004	6	3	2	5	0.6	0.4		N5DAT21DOT73118NAGC_004	21	6	1	7	0.857143	0.142857
	N4DAT6DOT73118NAGC_005	6	86	95	181	0.475138	0.524862		N5DAT21DOT73118NAGC_005	21	22	3	25	0.88	0.12
	N4DAT6DOT73118NAGC_006	6	8	4	12	0.666667	0.333333		N5DAT21DOT73118NAGC_006	21	116	34	150	0.773333	0.226667
	N4DAT6DOT73118NAGC_007	6	30	30	60	0.5	0.5		N5DAT21DOT73118NAGC_007	21	304	72	376	0.808511	0.191489
	N4DAT6DOT73118NAGC_008	6	11	7	18	0.611111	0.388889		N5DAT21DOT73118NAGC_008	21	199	31	230	0.865217	0.134783
	N4DAT6DOT73118NAGC_009	6	57	71	128	0.445312	0.554688		N5DAT21DOT73118NAGC_009	21	21	3	24	0.875	0.125
	N4DAT6DOT73118NAGC_010	6	28	33	61	0.459016	0.540984		N5DAT21DOT73118NAGC_010	21	27	5	32	0.84375	0.15625
	total # of cells counted		456	473	929				total # of cells counted		855	183	1038
	mean survival fraction (% ) by brain slice					0.536749	0.463251		mean survival fraction (% ) by brain slice					0.845222	0.154778
	N22DAT6DOT73118NAGC_001	6	58	37	95	0.610526	0.389474		N21DAT21DOT73118NAGC_001	21	26	6	32	0.8125	0.1875
	N22DAT6DOT73118NAGC_002	6	111	86	197	0.563452	0.436548		N21DAT21DOT73118NAGC_002	21	21	3	24	0.875	0.125
	N22DAT6DOT73118NAGC_003	6	31	26	57	0.54386	0.45614		N21DAT21DOT73118NAGC_003	21	13	1	14	0.928571	0.0714286
	N22DAT6DOT73118NAGC_004	6	38	30	68	0.558824	0.441176		N21DAT21DOT73118NAGC_004	21	12	1	13	0.923077	0.0769231
	N22DAT6DOT73118NAGC_005	6	11	6	17	0.647059	0.352941		N21DAT21DOT73118NAGC_005	21	10	1	11	0.909091	0.0909091
	N22DAT6DOT73118NAGC_006	6	176	129	305	0.577049	0.422951		N21DAT21DOT73118NAGC_006	21	18	3	21	0.857143	0.142857
	N22DAT6DOT73118NAGC_007	6	102	90	192	0.53125	0.46875		N21DAT21DOT73118NAGC_007	21	24	6	30	0.8	0.2
	N22DAT6DOT73118NAGC_008	6	47	49	96	0.489583	0.510417		N21DAT21DOT73118NAGC_008	21	34	3	37	0.918919	0.0810811
	N22DAT6DOT73118NAGC_009	6	41	23	64	0.640625	0.359375		N21DAT21DOT73118NAGC_009	21	26	2	28	0.928571	0.0714286
	N22DAT6DOT73118NAGC_010	6	68	42	110	0.618182	0.381818		N21DAT21DOT73118NAGC_010	21	15	5	20	0.75	0.25
	total # of cells counted		683	518	1201				total # of cells counted		199	31	230
	mean survival fraction (% ) by brain slice					0.578041	0.421959		mean survival fraction (% ) by brain slice					0.870287	0.129713
	N24DAT6DOT73118NAGC_001	6	59	50	109	0.541284	0.458716		N23DAT21DOT73118NAGC_001	21	6	0	6	1	0
	N24DAT6DOT73118NAGC_002	6	22	27	49	0.44898	0.55102		N23DAT21DOT73118NAGC_002	21	5	0	5	1	0
	N24DAT6DOT73118NAGC_003	6	18	13	31	0.580645	0.419355		N23DAT21DOT73118NAGC_003	21	18	5	23	0.782609	0.217391
	N24DAT6DOT73118NAGC_004	6	45	34	79	0.56962	0.43038		N23DAT21DOT73118NAGC_004	21	12	3	15	0.8	0.2
	N24DAT6DOT73118NAGC_005	6	37	33	70	0.528571	0.471429		N23DAT21DOT73118NAGC_005	21	13	0	13	1	0
	N24DAT6DOT73118NAGC_006	6	74	60	134	0.552239	0.447761		N23DAT21DOT73118NAGC_006	21	12	1	13	0.923077	0.0769231
	N24DAT6DOT73118NAGC_007	6	23	24	47	0.489362	0.510638		N23DAT21DOT73118NAGC_007	21	5	1	6	0.833333	0.166667
	N24DAT6DOT73118NAGC_008	6	10	10	20	0.5	0.5		N23DAT21DOT73118NAGC_008	21	8	1	9	0.888889	0.111111
	N24DAT6DOT73118NAGC_009	6	5	5	10	0.5	0.5		N23DAT21DOT73118NAGC_009	21	9	0	9	1	0
	N24DAT6DOT73118NAGC_010	6	31	31	62	0.5	0.5		N23DAT21DOT73118NAGC_010	21	6	0	6	1	0
	total # of cells counted		324	287	611				total # of cells counted		94	11	105
	mean survival fraction (% ) by brain slice					0.52107	0.47893		mean survival fraction (% ) by brain slice					0.922791	0.0772092
	Figure 11B'. Quantifications of transplanted cIN precursor cells (labeled with GFP or tdTomato) in cortex of recipient mice at 6 and 21 days after transplantation (DAT). MGE precursors cells were derived from Gad1-GFP (GFP+, WT Pcdhg) and Nkx2.1Cre;Ai14;Pcdhgtcko/gcko(tdTomato+, Pcdhc3, Pcdhc34 and Pcdhc5 deleted) E13.5 embryos, and equal proportions of GFP and tdTomato labeled cells were mixed b…
