# Supplementary material for: Clustered gamma-protocadherins regulate cortical interneuron programmed cell death
Source: eLife. 2020 Jul 7;9:e55374. doi: 10.7554/eLife.55374 (PMC7373431; doi:10.7554/eLife.55374)
Supplement: Figure 12—source data 1. [file elife-55374-fig12-data1.xlsx]

## Sheet: Figure 12B
	Figure 12B source data. Decreased survival of Nkx2.1-derived cIN precursor cells carrying mutant Pcdhg starts after 6 DAT and continues throughout the period of programmed cell death.
		6DAT			8DAT			10DAT			12DAT			21DAT
		mean survival fraction by brain			mean survival fraction by brain			mean survival fraction by brain			mean survival fraction by brain			mean survival fraction by brain
	brain #	GFP WT	tdTomato mutant		GFP WT	tdTomato mutant		GFP WT	tdTomato mutant		GFP WT	tdTomato mutant		GFP WT	tdTomato mutant
	brain 5	0.532596	0.467404	brain 22	0.670081	0.329919	brain 1	0.769315	0.230685	*brain 24	0.954819	0.0451807	brain 2	0.892936	0.107064
	brain1	0.460751	0.539249	brain 3	0.592428	0.407572	brain 3	0.651843	0.348157	brain 5	0.831426	0.168574	brain 4	0.895977	0.104023
	brain 3	0.487585	0.512415	brain 6	0.576126	0.423874	brain 4	0.658953	0.341047	brain 7	0.764172	0.235828	brain 6	0.878915	0.121085
	brain 7	0.428638	0.571362										brain 8	0.922553	0.0774468
	brain9	0.50814	0.49186										brain 10	0.923821	0.0761788
	brain 2	0.54894	0.45106
	Mean of Means (%)	0.494442	0.505558	average	0.612878	0.387122	average	0.69337	0.30663	average	0.850139	0.149861	average	0.90284	0.0971595
										* note brain 24 is at 13 DAT timepoint
	Figure 12B source data. Quantifications of co-transplanted MGE-derived cIN precursor cells (labeled with GFP or tdTomato ) in cortex of Blk6 recipient mice at 6, 8, 10, 12 and 21 days after transplantation (DAT). MGE precursors cells were derived from Gad1-GFP (GFP+, WT Pcdhg) and Nkx2.1Cre;Ai14;Pcdhgfcon3/fcon3 (tdTomato+, mutant Pcdhg) E13.5 embryos, and equal proportions of GFP and tdTomato la…

## Sheet: Figure 12 C-F raw data by cell
	Figure 12 C-F source data. Neurite complexity measurements in each of the analyzed transplanted cells at 6, 8 ,10 and 12 days after transplantation (DAT). MGE-derived cIN precursor cells for transplantation were from Gad1-GFP (GFP+, Pcdhg WT) and Nxk2.1Cre;Ai14;Pcdhgfcon3/fcon3 (tdTomato+, Pcdhg mutant) embryos at E13.5.
	6 DAT
	WT
	cell number/ID	WT 1	WT 2	WT 3	WT 4	WT 5	WT 6	WT 7	WT 8	WT 9	WT 10	WT 11	WT 12	WT 13	WT 14	WT 15	WT 16	WT 17	WT 18	WT 19	WT 20	WT 21	WT 22	WT 23	WT 24	WT 25	WT 26	WT 27	WT 28	WT 29	WT 30	WT 31	WT 32
	# of dendrites	5	6	3	1	3	9	6	7	5	4	2	4	6	5	3	2	3	3	5	4	7	4	2	2	3	2	3	3	2	3	3	3
	# of Nodes	10	5	9	8	3	8	9	2	0	7	9	3	13	5	5	1	3	6	2	3	4	12	5	0	11	8	8	10	4	4	10	1
	# of Ends	16	11	11	9	6	17	16	9	5	11	11	7	19	10	8	3	5	9	7	7	11	16	7	2	14	10	11	13	6	8	14	4
	Total dendritic length	439.59	198.18	365.44	178.31	90.83	483.67	774.49	133.29	157.62	306.17	377.98	132.43	467.69	302.92	290.54	162.01	260.96	305.18	254.69	361.48	337.47	568.77	354.87	115.02	289.45	264.33	194.81	456.01	139.1	325.09	453.51	127.54
	Mutant
	cell number/ID	mutant 1	mutant 2	mutant 3	mutant 4	mutant 5	mutant 6	mutant 7	mutant 8	mutant 9	mutant 10	mutant 11	mutant 12	mutant 13	mutant 14	mutant 15	mutant 16	mutant 17	mutant 18	mutant 19	mutant 20	mutant 21	mutant 22	mutant 23	mutant 24	mutant 25	mutant 26	mutant 27	mutant 28	mutant 29	mutant 30	mutant 31	mutant 32	mutant 33	mutant 34	mutant 35
	# of dendrites	3	7	4	3	2	3	2	3	2	2	2	2	3	8	4	4	4	5	9	2	4	3	6	3	12	3	3	5	7	4	4	3	2	4	4
	# of Nodes	4	7	3	2	4	9	5	11	1	2	5	8	6	5	8	2	6	5	11	2	6	6	8	3	14	2	5	8	15	4	10	5	3	5	4
	# of Ends	7	14	7	6	6	14	7	15	3	4	7	10	9	13	12	6	10	10	21	4	11	9	14	6	26	5	8	13	23	8	14	8	5	9	8
	Total dendritic length	188.32	243.93	265.38	110.12	202.83	339.8	274.95	252.25	218.64	77.34	235	413.85	262.09	308.13	310.06	171.83	253.08	332.33	511.28	125.32	230.24	176.66	195.34	297.92	646.56	97.04	214.8	330	637.74	274.13	315.25	177.94	131.03	224.07	240.49
	8 DAT
	WT
	cell number/ID	WT 1	WT 2	WT 3	WT 4	WT 5	WT 6	WT 7	WT 8	WT 9	WT 10	WT 11	WT 12	WT 13	WT 14	WT 15	WT 16	WT 17	WT 18	WT 19	WT 20	WT 21	WT 22	WT 23	WT 24	WT 25	WT 26	WT 27
	# of dendrites	4	5	7	6	3	4	3	3	10	5	4	7	4	6	7	5	7	5	6	6	7	6	5	7	5	4	5
	# of Nodes	14	15	20	20	4	29	2	2	5	13	5	31	7	19	8	4	11	4	7	6	24	20	4	11	16	6	10
	# of Ends	18	23	27	26	7	35	5	5	15	17	9	39	11	27	15	9	18	9	13	12	31	26	9	18	21	10	15
	Total dendritic length	316.64	488.86	773.86	758.91	268.12	988.23	244.97	244.97	416.75	381.21	429.3	1121.08	282.68	798.22	530.48	496.06	647.22	364.83	574.39	508.06	840.58	789.99	244.42	544.11	888.93	270.98	3191.04
	Mutant
	cell number/ID	mutant 1	mutant 2	mutant 3	mutant 4	mutant 5	mutant 6	mutant 7	mutant 8	mutant 9	mutant 10	mutant 11	mutant 12	mutant 13	mutant 14	mutant 15	mutant 16	mutant 17	mutant 18	mutant 19	mutant 20	mutant 21	mutant 22	mutant 23	mutant 24	mutant 25	mutant 26	mutant 27
	# of dendrites	3	6	15	12	6	9	6	4	10	4	10	3	6	9	6	7	4	1	5	4	7	7	4	5	11	9	6
	# of Nodes	15	12	25	4	24	19	8	10	41	16	24	6	20	13	11	5	25	2	30	13	17	14	21	13	8	13	13
	# of Ends	19	18	41	16	32	30	14	15	52	20	34	9	26	22	17	12	30	3	36	19	24	23	26	18	19	22	20
	Total dendritic length	495.66	342.04	799.11	475.6	1261.37	851.15	433.62	657.6	1774.93	734.3	1180.35	394.12	693.53	515.87	553.04	606.18	742.27	120.2	701.48	387.65	869.47	545.12	879.77	346.38	630.29	755.23	848.36
	10 DAT
	WT
	cell number/ID	WT 1	WT 2	WT 3	WT 4	WT 5	WT 6	WT 7	WT 8	WT 9	WT 10	WT 11	WT 12	WT 13	WT 14	WT 15	WT 16	WT 17	WT 18	WT 19	WT 20	WT 21	WT 22	WT 23	WT 24	WT 25
	# of dendrites	5	6	44	9	6	6	9	7	4	11	10	8	11	11	7	5	7	8	9	10	14	10	9	7	7
	# of Nodes	19	17	117	18	21	18	19	12	7	22	18	34	23	18	15	21	17	27	14	15	39	9	15	28	17
	# of Ends	23	24	171	30	27	24	30	19	11	33	28	42	35	29	22	28	25	36	23	26	53	19	24	36	26
	Total dendritic length	670.59	844.75	5274.03	1319.68	1094.72	868.34	835.39	696.28	424.14	958.81	815.9	1297.74	938.08	1462.96	548.88	673.37	466.02	861.89	909.39	898.78	1290.63	507.86	653.06	1034.46	675.43
	Mutant
	cell number/ID	mutant 1	mutant 2	mutant 3	mutant 4	mutant 5	mutant 6	mutant 7	mutant 8	mutant 9	mutant 10	mutant 11	mutant 12	mutant 13	mutant 14	mutant 15	mutant 16	mutant 17	mutant 18	mutant 19	mutant 20	mutant 21	mutant 22	mutant 23	mutant 24	mutant 25	mutant 26
	# of dendrites	9	5	10	9	11	11	7	4	9	4	11	9	10	6	8	6	10	9	4	6	10	9	6	5	6	6
	# of Nodes	14	3	18	12	23	23	23	13	9	7	20	9	24	18	27	11	39	13	20	17	18	16	15	14	21	20
	# of Ends	23	8	28	22	36	36	32	18	19	11	30	18	35	24	36	18	51	24	25	24	29	25	21	19	30	27
	Total dendritic length	723.51	164.62	882.47	904.7	1169.97	1467.73	859.01	469.88	478.53	392.28	1558.64	672.72	962.76	763.86	1029.82	689.54	3187.37	641.54	700.08	1136.21	701.46	541.99	986.76	566.12	1152.48	712.51
	12 DAT
	WT
	cell number/ID	WT 1	WT 2	WT 3	WT 4	WT 5	WT 6	WT 7	WT 8	WT 9	WT 10	WT 11	WT 12	WT 13	WT 14	WT 15	WT 16	WT 17	WT 18	WT 19	WT 20	WT 21	WT 22	WT 23	WT 24	WT 25	WT 26	WT 27	WT 28
	# of dendrites	5	10	7	6	NA	6	7	8	6	11	8	6	14	7	5	8	11	10	6	11	12	10	12	9	12	10	12	9
	# of Nodes	43	51	17	11	NA	10	38	32	21	43	42	27	48	34	1	26	17	21	17	34	17	20	10	37	17	20	10	37
	# of Ends	53	61	27	18	NA	16	45	40	27	55	55	35	64	42	6	36	28	31	24	45	29	30	23	47	29	30	23	47
	Total dendritic length	1503.76	1848.57	823.56	438.4	NA	476.9	1359.47	1204.09	817.2	1406.08	1700.02	1171.05	2373.01	1172.57	200.82	1138.51	653.71	1413.64	877.98	1219.29	1029.09	1168.06	929.84	1968.55	1029.09	1168.06	929.84	1968.55
	Mutant
	cell number/ID	mutant 1	mutant 2	mutant 3	mutant 4	mutant 5	mutant 6	mutant 7	mutant 8	mutant 9	mutant 10	mutant 11	mutant 12	mutant 13	mutant 14	mutant 15	mutant 16	mutant 17	mutant 18	mutant 19	mutant 20	mutant 21	mutant 22	mutant 23	mutant 24	mutant 25	mutant 26	mutant 27	mutant 28	mutant 29	mutant 30	mutant 31	mutant 32
	# of dendrites	13	8	6	9	16	9	11	8	9	8	NA	NA	6	7	5	7	10	7	9	9	12	6	16	9	11	8	9	8	9	4	4	8
	# of Nodes	55	10	37	28	21	14	14	22	31	23	NA	NA	17	21	4	8	9	35	23	24	23	10	21	14	14	22	31	23	23	16	6	19
	# of Ends	69	20	45	38	37	25	26	31	41	34	NA	NA	23	29	9	15	19	43	32	34	36	16	37	25	26	31	41	34	34	21	12	27
	Total dendritic length	2131.26	998.08	1817.85	1219.72	1157.36	1501.09	1092.92	1564.32	1415.89	1308.48	NA	NA	1087.44	1311.16	305.42	607.64	587.07	2025.87	899.86	992.39	1467.85	637.54	1157.36	1501.09	1092.92	1564.32	1415.89	1308.48	1403.75	703.59	313.94	1154.57

## Sheet: Figure 12 C-F analyzed
	Figure 12C-D source data. WT and Pcdhg mutant transplanted cINs display remarkably similar morphological properties during the period of programmed cell death.
	Figure 12C									Figure 12D									Figure 12E									Figure 12F
	WT cells ( Pcdhg WT, green cells)
	Total neurite length (um)									Number of neurites									Number of nodes									Number of ends
	6DAT		8 DAT		10 DAT		12 DAT			6DAT		8 DAT		10 DAT		12 DAT			6DAT		8 DAT		10 DAT		12 DAT			6DAT		8 DAT		10 DAT		12 DAT
	cell number/ID	neurite length (um)	cell number/ID	neurite length (um)	cell number/ID	neurite length (um)	cell number/ID	neurite length (um)		cell number/ID	# of neurites	cell number/ID	# of neurites	cell number/ID	# of neurites	cell number/ID	# of neurites		cell number/ID	# of nodes	cell number/ID	# of nodes	cell number/ID	# of nodes	cell number/ID	# of nodes		cell number/ID	# of ends	cell number/ID	# of ends	cell number/ID	# of ends	cell number/ID	# of ends
	WT 1	439.59	WT 1	316.64	WT 1	670.59	WT 1	1503.76		WT 1	5	WT 1	4	WT 1	5	WT 1	5		WT 1	10	WT 1	14	WT 1	19	WT 1	43		WT 1	16	WT 1	18	WT 1	23	WT 1	53
	WT 2	198.18	WT 2	488.86	WT 2	844.75	WT 2	1848.57		WT 2	6	WT 2	5	WT 2	6	WT 2	10		WT 2	5	WT 2	15	WT 2	17	WT 2	51		WT 2	11	WT 2	23	WT 2	24	WT 2	61
	WT 3	365.44	WT 3	773.86	WT 3	5274.03	WT 3	823.56		WT 3	3	WT 3	7	WT 3	44	WT 3	7		WT 3	9	WT 3	20	WT 3	117	WT 3	17		WT 3	11	WT 3	27	WT 3	171	WT 3	27
	WT 4	178.31	WT 4	758.91	WT 4	1319.68	WT 4	438.4		WT 4	1	WT 4	6	WT 4	9	WT 4	6		WT 4	8	WT 4	20	WT 4	18	WT 4	11		WT 4	9	WT 4	26	WT 4	30	WT 4	18
	WT 5	90.83	WT 5	268.12	WT 5	1094.72	WT 5	NA		WT 5	3	WT 5	3	WT 5	6	WT 5	NA		WT 5	3	WT 5	4	WT 5	21	WT 5	NA		WT 5	6	WT 5	7	WT 5	27	WT 5	NA
	WT 6	483.67	WT 6	988.23	WT 6	868.34	WT 6	476.9		WT 6	9	WT 6	4	WT 6	6	WT 6	6		WT 6	8	WT 6	29	WT 6	18	WT 6	10		WT 6	17	WT 6	35	WT 6	24	WT 6	16
	WT 7	774.49	WT 7	244.97	WT 7	835.39	WT 7	1359.47		WT 7	6	WT 7	3	WT 7	9	WT 7	7		WT 7	9	WT 7	2	WT 7	19	WT 7	38		WT 7	16	WT 7	5	WT 7	30	WT 7	45
	WT 8	133.29	WT 8	244.97	WT 8	696.28	WT 8	1204.09		WT 8	7	WT 8	3	WT 8	7	WT 8	8		WT 8	2	WT 8	2	WT 8	12	WT 8	32		WT 8	9	WT 8	5	WT 8	19	WT 8	40
	WT 9	157.62	WT 9	416.75	WT 9	424.14	WT 9	817.2		WT 9	5	WT 9	10	WT 9	4	WT 9	6		WT 9	0	WT 9	5	WT 9	7	WT 9	21		WT 9	5	WT 9	15	WT 9	11	WT 9	27
	WT 10	306.17	WT 10	381.21	WT 10	958.81	WT 10	1406.08		WT 10	4	WT 10	5	WT 10	11	WT 10	11		WT 10	7	WT 10	13	WT 10	22	WT 10	43		WT 10	11	WT 10	17	WT 10	33	WT 10	55
	WT 11	377.98	WT 11	429.3	WT 11	815.9	WT 11	1700.02		WT 11	2	WT 11	4	WT 11	10	WT 11	8		WT 11	9	WT 11	5	WT 11	18	WT 11	42		WT 11	11	WT 11	9	WT 11	28	WT 11	55
	WT 12	132.43	WT 12	1121.08	WT 12	1297.74	WT 12	1171.05		WT 12	4	WT 12	7	WT 12	8	WT 12	6		WT 12	3	WT 12	31	WT 12	34	WT 12	27		WT 12	7	WT 12	39	WT 12	42	WT 12	35
	WT 13	467.69	WT 13	282.68	WT 13	938.08	WT 13	2373.01		WT 13	6	WT 13	4	WT 13	11	WT 13	14		WT 13	13	WT 13	7	WT 13	23	WT 13	48		WT 13	19	WT 13	11	WT 13	35	WT 13	64
	WT 14	302.92	WT 14	798.22	WT 14	1462.96	WT 14	1172.57		WT 14	5	WT 14	6	WT 14	11	WT 14	7		WT 14	5	WT 14	19	WT 14	18	WT 14	34		WT 14	10	WT 14	27	WT 14	29	WT 14	42
	WT 15	290.54	WT 15	530.48	WT 15	548.88	WT 15	200.82		WT 15	3	WT 15	7	WT 15	7	WT 15	5		WT 15	5	WT 15	8	WT 15	15	WT 15	1		WT 15	8	WT 15	15	WT 15	22	WT 15	6
	WT 16	162.01	WT 16	496.06	WT 16	673.37	WT 16	1138.51		WT 16	2	WT 16	5	WT 16	5	WT 16	8		WT 16	1	WT 16	4	WT 16	21	WT 16	26		WT 16	3	WT 16	9	WT 16	28	WT 16	36
	WT 17	260.96	WT 17	647.22	WT 17	466.02	WT 17	653.71		WT 17	3	WT 17	7	WT 17	7	WT 17	11		WT 17	3	WT 17	11	WT 17	17	WT 17	17		WT 17	5	WT 17	18	WT 17	25	WT 17	28
	WT 18	305.18	WT 18	364.83	WT 18	861.89	WT 18	1413.64		WT 18	3	WT 18	5	WT 18	8	WT 18	10		WT 18	6	WT 18	4	WT 18	27	WT 18	21		WT 18	9	WT 18	9	WT 18	36	WT 18	31
	WT 19	254.69	WT 19	574.39	WT 19	909.39	WT 19	877.98		WT 19	5	WT 19	6	WT 19	9	WT 19	6		WT 19	2	WT 19	7	WT 19	14	WT 19	17		WT 19	7	WT 19	13	WT 19	23	WT 19	24
	WT 20	361.48	WT 20	508.06	WT 20	898.78	WT 20	1219.29		WT 20	4	WT 20	6	WT 20	10	WT 20	11		WT 20	3	WT 20	6	WT 20	15	WT 20	34		WT 20	7	WT 20	12	WT 20	26	WT 20	45
	WT 21	337.47	WT 21	840.58	WT 21	1290.63	WT 21	1029.09		WT 21	7	WT 21	7	WT 21	14	WT 21	12		WT 21	4	WT 21	24	WT 21	39	WT 21	17		WT 21	11	WT 21	31	WT 21	53	WT 21	29
	WT 22	568.77	WT 22	789.99	WT 22	507.86	WT 22	1168.06		WT 22	4	WT 22	6	WT 22	10	WT 22	10		WT 22	12	WT 22	20	WT 22	9	WT 22	20		WT 22	16	WT 22	26	WT 22	19	WT 22	30
	WT 23	354.87	WT 23	244.42	WT 23	653.06	WT 23	929.84		WT 23	2	WT 23	5	WT 23	9	WT 23	12		WT 23	5	WT 23	4	WT 23	15	WT 23	10		WT 23	7	WT 23	9	WT 23	24	WT 23	23
	WT 24	115.02	WT 24	544.11	WT 24	1034.46	WT 24	1968.55		WT 24	2	WT 24	7	WT 24	7	WT 24	9		WT 24	0	WT 24	11	WT 24	28	WT 24	37		WT 24	2	WT 24	18	WT 24	36	WT 24	47
	WT 25	289.45	WT 25	888.93	WT 25	675.43	WT 25	1029.09		WT 25	3	WT 25	5	WT 25	7	WT 25	12		WT 25	11	WT 25	16	WT 25	17	WT 25	17		WT 25	14	WT 25	21	WT 25	26	WT 25	29
	WT 26	264.33	WT 26	270.98			WT 26	1168.06		WT 26	2	WT 26	4			WT 26	10		WT 26	8	WT 26	6			WT 26	20		WT 26	10	WT 26	10			WT 26	30
	WT 27	194.81	WT 27	3191.04			WT 27	929.84		WT 27	3	WT 27	5			WT 27	12		WT 27	8	WT 27	10			WT 27	10		WT 27	11	WT 27	15			WT 27	23
	WT 28	456.01					WT 28	1968.55		WT 28	3					WT 28	9		WT 28	10					WT 28	37		WT 28	13					WT 28	47
	WT 29	139.1								WT 29	2								WT 29	4								WT 29	6
	WT 30	325.09								WT 30	3								WT 30	4								WT 30	8
	WT 31	453.51								WT 31	3								WT 31	10								WT 31	14
	WT 32	127.54								WT 32	3								WT 32	1								WT 32	4
	mutant cells (Pcdhg mutant, red cells)
	Total neurite length (um)									number of neurites									number of nodes									number of ends
	6DAT		8 DAT		10 DAT		12 DAT			6DAT		8 DAT		10 DAT		12 DAT			6DAT		8 DAT		10 DAT		12 DAT			6DAT		8 DAT		10 DAT		12 DAT
	cell number/ID	neurite length (um)	cell number/ID	neurite length (um)	cell number/ID	neurite length (um)	cell number/ID	neurite length (um)		cell number/ID	# of neurites	cell number/ID	# of neurites	cell number/ID	# of neurites	cell number/ID	# of neurites		cell number/ID	# of nodes	cell number/ID	# of nodes	cell number/ID	# of nodes	cell number/ID	# of nodes		cell number/ID	# of ends	cell number/ID	# of ends	cell number/ID	# of ends	cell number/ID	# of ends
	mutant 1	188.32	mutant 1	495.66	mutant 1	723.51	mutant 1	2131.26		mutant 1	3	mutant 1	3	mutant 1	9	mutant 1	13		mutant 1	4	mutant 1	15	mutant 1	14	mutant 1	55		mutant 1	7	mutant 1	19	mutant 1	23	mutant 1	69
	mutant 2	243.93	mutant 2	342.04	mutant 2	164.62	mutant 2	998.08		mutant 2	7	mutant 2	6	mutant 2	5	mutant 2	8		mutant 2	7	mutant 2	12	mutant 2	3	mutant 2	10		mutant 2	14	mutant 2	18	mutant 2	8	mutant 2	20
	mutant 3	265.38	mutant 3	799.11	mutant 3	882.47	mutant 3	1817.85		mutant 3	4	mutant 3	15	mutant 3	10	mutant 3	6		mutant 3	3	mutant 3	25	mutant 3	18	mutant 3	37		mutant 3	7	mutant 3	41	mutant 3	28	mutant 3	45
	mutant 4	110.12	mutant 4	475.6	mutant 4	904.7	mutant 4	1219.72		mutant 4	3	mutant 4	12	mutant 4	9	mutant 4	9		mutant 4	2	mutant 4	4	mutant 4	12	mutant 4	28		mutant 4	6	mutant 4	16	mutant 4	22	mutant 4	38
	mutant 5	202.83	mutant 5	1261.37	mutant 5	1169.97	mutant 5	1157.36		mutant 5	2	mutant 5	6	mutant 5	11	mutant 5	16		mutant 5	4	mutant 5	24	mutant 5	23	mutant 5	21		mutant 5	6	mutant 5	32	mutant 5	36	mutant 5	37
	mutant 6	339.8	mutant 6	851.15	mutant 6	1467.73	mutant 6	1501.09		mutant 6	3	mutant 6	9	mutant 6	11	mutant 6	9		mutant 6	9	mutant 6	19	mutant 6	23	mutant 6	14		mutant 6	14	mutant 6	30	mutant 6	36	mutant 6	25
	mutant 7	274.95	mutant 7	433.62	mutant 7	859.01	mutant 7	1092.92		mutant 7	2	mutant 7	6	mutant 7	7	mutant 7	11		mutant 7	5	mutant 7	8	mutant 7	23	mutant 7	14		mutant 7	7	mutant 7	14	mutant 7	32	mutant 7	26
	mutant 8	252.25	mutant 8	657.6	mutant 8	469.88	mutant 8	1564.32		mutant 8	3	mutant 8	4	mutant 8	4	mutant 8	8		mutant 8	11	mutant 8	10	mutant 8	13	mutant 8	22		mutant 8	15	mutant 8	15	mutant 8	18	mutant 8	31
	mutant 9	218.64	mutant 9	1774.93	mutant 9	478.53	mutant 9	1415.89		mutant 9	2	mutant 9	10	mutant 9	9	mutant 9	9		mutant 9	1	mutant 9	41	mutant 9	9	mutant 9	31		mutant 9	3	mutant 9	52	mutant 9	19	mutant 9	41
	mutant 10	77.34	mutant 10	734.3	mutant 10	392.28	mutant 10	1308.48		mutant 10	2	mutant 10	4	mutant 10	4	mutant 10	8		mutant 10	2	mutant 10	16	mutant 10	7	mutant 10	23		mutant 10	4	mutant 10	20	mutant 10	11	mutant 10	34
	mutant 11	235	mutant 11	1180.35	mutant 11	1558.64	mutant 11	NA		mutant 11	2	mutant 11	10	mutant 11	11	mutant 11	NA		mutant 11	5	mutant 11	24	mutant 11	20	mutant 11	NA		mutant 11	7	mutant 11	34	mutant 11	30	mutant 11	NA
	mutant 12	413.85	mutant 12	394.12	mutant 12	672.72	mutant 12	NA		mutant 12	2	mutant 12	3	mutant 12	9	mutant 12	NA		mutant 12	8	mutant 12	6	mutant 12	9	mutant 12	NA		mutant 12	10	mutant 12	9	mutant 12	18	mutant 12	NA
	mutant 13	262.09	mutant 13	693.53	mutant 13	962.76	mutant 13	1087.44		mutant 13	3	mutant 13	6	mutant 13	10	mutant 13	6		mutant 13	6	mutant 13	20	mutant 13	24	mutant 13	17		mutant 13	9	mutant 13	26	mutant 13	35	mutant 13	23
	mutant 14	308.13	mutant 14	515.87	mutant 14	763.86	mutant 14	1311.16		mutant 14	8	mutant 14	9	mutant 14	6	mutant 14	7		mutant 14	5	mutant 14	13	mutant 14	18	mutant 14	21		mutant 14	13	mutant 14	22	mutant 14	24	mutant 14	29
	mutant 15	310.06	mutant 15	553.04	mutant 15	1029.82	mutant 15	305.42		mutant 15	4	mutant 15	6	mutant 15	8	mutant 15	5		mutant 15	8	mutant 15	11	mutant 15	27	mutant 15	4		mutant 15	12	mutant 15	17	mutant 15	36	mutant 15	9
	mutant 16	171.83	mutant 16	606.18	mutant 16	689.54	mutant 16	607.64		mutant 16	4	mutant 16	7	mutant 16	6	mutant 16	7		mutant 16	2	mutant 16	5	mutant 16	11	mutant 16	8		mutant 16	6	mutant 16	12	mutant 16	18	mutant 16	15
	mutant 17	253.08	mutant 17	742.27	mutant 17	3187.37	mutant 17	587.07		mutant 17	4	mutant 17	4	mutant 17	10	mutant 17	10		mutant 17	6	mutant 17	25	mutant 17	39	mutant 17	9		mutant 17	10	mutant 17	30	mutant 17	51	mutant 17	19
	mutant 18	332.33	mutant 18	120.2	mutant 18	641.54	mutant 18	2025.87		mutant 18	5	mutant 18	1	mutant 18	9	mutant 18	7		mutant 18	5	mutant 18	2	mutant 18	13	mutant 18	35		mutant 18	10	mutant 18	3	mutant 18	24	mutant 18	43
	mutant 19	511.28	mutant 19	701.48	mutant 19	700.08	mutant 19	899.86		mutant 19	9	mutant 19	5	mutant 19	4	mutant 19	9		mutant 19	11	mutant 19	30	mutant 19	20	mutant 19	23		mutant 19	21	mutant 19	36	mutant 19	25	mutant 19	32
	mutant 20	125.32	mutant 20	387.65	mutant 20	1136.21	mutant 20	992.39		mutant 20	2	mutant 20	4	mutant 20	6	mutant 20	9		mutant 20	2	mutant 20	13	mutant 20	17	mutant 20	24		mutant 20	4	mutant 20	19	mutant 20	24	mutant 20	34
	mutant 21	230.24	mutant 21	869.47	mutant 21	701.46	mutant 21	1467.85		mutant 21	4	mutant 21	7	mutant 21	10	mutant 21	12		mutant 21	6	mutant 21	17	mutant 21	18	mutant 21	23		mutant 21	11	mutant 21	24	mutant 21	29	mutant 21	36
	mutant 22	176.66	mutant 22	545.12	mutant 22	541.99	mutant 22	637.54		mutant 22	3	mutant 22	7	mutant 22	9	mutant 22	6		mutant 22	6	mutant 22	14	mutant 22	16	mutant 22	10		mutant 22	9	mutant 22	23	mutant 22	25	mutant 22	16
	mutant 23	195.34	mutant 23	879.77	mutant 23	986.76	mutant 23	1157.36		mutant 23	6	mutant 23	4	mutant 23	6	mutant 23	16		mutant 23	8	mutant 23	21	mutant 23	15	mutant 23	21		mutant 23	14	mutant 23	26	mutant 23	21	mutant 23	37
	mutant 24	297.92	mutant 24	346.38	mutant 24	566.12	mutant 24	1501.09		mutant 24	3	mutant 24	5	mutant 24	5	mutant 24	9		mutant 24	3	mutant 24	13	mutant 24	14	mutant 24	14		mutant 24	6	mutant 24	18	mutant 24	19	mutant 24	25
	mutant 25	646.56	mutant 25	630.29	mutant 25	1152.48	mutant 25	1092.92		mutant 25	12	mutant 25	11	mutant 25	6	mutant 25	11		mutant 25	14	mutant 25	8	mutant 25	21	mutant 25	14		mutant 25	26	mutant 25	19	mutant 25	30	mutant 25	26
	mutant 26	97.04	mutant 26	755.23	mutant 26	712.51	mutant 26	1564.32		mutant 26	3	mutant 26	9	mutant 26	6	mutant 26	8		mutant 26	2	mutant 26	13	mutant 26	20	mutant 26	22		mutant 26	5	mutant 26	22	mutant 26	27	mutant 26	31
	mutant 27	214.8	mutant 27	848.36			mutant 27	1415.89		mutant 27	3	mutant 27	6			mutant 27	9		mutant 27	5	mutant 27	13			mutant 27	31		mutant 27	8	mutant 27	20			mutant 27	41
	mutant 28	330					mutant 28	1308.48		mutant 28	5					mutant 28	8		mutant 28	8					mutant 28	23		mutant 28	13					mutant 28	34
	mutant 29	637.74					mutant 29	1403.75		mutant 29	7					mutant 29	9		mutant 29	15					mutant 29	23		mutant 29	23					mutant 29	34
	mutant 30	274.13					mutant 30	703.59		mutant 30	4					mutant 30	4		mutant 30	4					mutant 30	16		mutant 30	8					mutant 30	21
	mutant 31	315.25					mutant 31	313.94		mutant 31	4					mutant 31	4		mutant 31	10					mutant 31	6		mutant 31	14					mutant 31	12
	mutant 32	177.94					mutant 32	1154.57		mutant 32	3					mutant 32	8		mutant 32	5					mutant 32	19		mutant 32	8					mutant 32	27
	mutant 33	131.03								mutant 33	2								mutant 33	3								mutant 33	5
	mutant 34	224.07								mutant 34	4								mutant 34	5								mutant 34	9
	mutant 35	240.49								mutant 35	4								mutant 35	4								mutant 35	8
	Figure 12 C-F source data. Neurite complexity measurements in each of the analyzed transplanted cells at 6, 8 ,10 and 12 days after transplantation (DAT). MGE-derived cIN precursor cells for transplantation were from Gad1-GFP (GFP+, Pcdhg WT) and Nxk2.1Cre;Ai14;Pcdhgfcon3/fcon3 (tdTomato+, Pcdhg mutant) embryos at E13.5.

## Sheet: Means + SD of Figure 12C-F data
	Figure 12C					Figure 12D
		Total neurite length (um)					# of neurites
		WT	Pcdhgfcon3/fcon3	Mann-Whitney			WT	Pcdhgfcon3/fcon3	Mann-Whitney
		Mean ± SD	Mean ± SD	p value			Mean ± SD	Mean ± SD	p value
	6DAT	302 ± 152 (n=32)	265 ± 129(n=35)	0.2423		6DAT	3.8 ± 1.8 (n=32)	4.01 ± 2.2 (n=35)	0.9313
	8DAT	645 ± 566(n=27)	689 ± 332(n=27)	0.1611		8DAT	5.4 ± 1.6(n=27)	6.6 ± 3.2(n=35)	0.1922
	10DAT	1029 ± 907 (n=26)	930± 568(n=27)	0.8392		10DAT	9.5± 7.4 (n=26)	7.6 ± 2.4 (n=27)	0.324
	12DAT	1185± 497(n=27)	1226± 447(n=31)	0.6286		12DAT	8.7± 2.6(n=27)	8.7± 2.8(n=31)	0.8704
	Figure 1E					Figure 1F
		# of nodes					# of ends
		WT	Pcdhgfcon3/fcon3	Mann-Whitney			WT	Pcdhgfcon3/fcon3	Mann-Whitney
		Mean ± SD	Mean ± SD	p value			Mean ± SD	Mean ± SD	p value
	6DAT	5.9 ± 3.6 (n=32)	5.8 ± 3.4 (n=35)	0.9077		6DAT	9.8 ± 4.3 (n=32)	10 ± 5.3 (n=35)	0.7856
	8DAT	12 ± 8.2 (n=27)	16 ± 8.7 (n=27)	0.0748		8DAT	17 ± 9.2 (n=27)	23 ± 10(n=27)	0.0334
	10DAT	23 ± 20 (n=26)	18 ± 7.3 (n=27)	0.4491		10DAT	33 ± 29 (n=26)	27 ± 8.5 (n=27)	0.5145
	12DAT	26± 13(n=27)	21± 11(n=31)	0.181		12DAT	36± 14(n=27)	31± 12(n=31)	0.2247
