# Supplementary material for: Clustered gamma-protocadherins regulate cortical interneuron programmed cell death
Source: eLife. 2020 Jul 7;9:e55374. doi: 10.7554/eLife.55374 (PMC7373431; doi:10.7554/eLife.55374)
Supplement: Figure 13—source data 1. [file elife-55374-fig13-data1.xlsx]

## Sheet: figure Bb
Figure 13Bb source data. WT and Pcdhg mutant transplanted cINs recieved remarkably similar number glutamatergic events
8DAT GFP	8DAT RFP	9DAT GFP	9DAT RFP	10DAT GFP	10DAT RFP	11DAT GFP	11DAT RFP	12DAT GFP	12DAT RFP
2.43333	0.738889	0.294444	0.172222	3.73889	2.01667	4.72222	6.68889	8.05556	3.26667
1.03333	1.05556	1.06111	1.10556	1.97222	2.71667	1.30556	7.06667	0.805556	0.472222
0.316667	1.76667	0.116667	0.288889	9.06111	2.23333	4.07778	2.76111	3.55556	1.25556
0.916667	0.783333	2.29445	0.205556	0.7	1.42222	2.88333	7.36111	0.438889	2.67222
1.63889	1.44444	0.25	0.466667	3.67222	1.02222	0.594445	0.838889	4.8	2.83889
0.461111	1.05556	0.444445	0.138889	6.43889	2.09444	1.92222	2.46667	0.777778	0.455556
0.572222	0.533333	0.583333	0.675	1.35	1.40556	4.90556	3.8	2.85556	1.17222
0.833333	0.675	0.761111	0.566667	2.86667	4.57222	1.80556	2.16111	9.69444	2.1
1.18333	0.105556	2.74444	0.561111	0.927778	2.29167	0.544444	0.772222	0.661111	7.77778
	1.38889	1.53333	3.79445			1.15556	1.26667	2.00556	3.77778
	0.494444	1.44444	2.71667			5.82778	1.75556	3.63333	2.93889
	0.533333	2.23333	1.73889			1.71667	4.94444	2.21111
	0.594445	4.65	3.96111				1.32222	4.04444
	1.02222	5.15	1.86667			0.6	2.20555	2.18333
	1.5	0.994444	0.233333
	0.583333	1.62222	4.18333
	0.555556	3.14445	0.722222
	3.21111	0.527778	2.79445
		1.57778	0.35
		0.383333
		1.89444
1.04321	1.00231	1.60503	1.39693	3.4142	2.19722	2.46624	3.24365	3.26587	2.61162
0.657229	0.699986	1.39079	1.40661	2.77032	1.03512	1.82916	2.3441	2.75273	2.05034
9	18	21	19	9	9	13	14	14	11

## Sheet: figure Bc
Figure 13Bc source data. WT and Pcdhg mutant transplanted cINs recieved remarkably similar number GABAergic events.
8DAT GFP	8DAT RFP	9DAT GFP	9DAT RFP	10DAT GFP	10DAT RFP	11DAT GFP	11DAT RFP	12DAT GFP	12DAT RFP
0.0944444	0.266667	0.311111	0.227778	0.4	0.594445	0.333333	0.305556	0.916667	0.738889
0.25	0.361111	0.277778	0.438889	0.644444	0.755556	0.322222	0.166667	0.922222	0.772222
0.494444	0.427778	0.0722222	0.383333	1.23889	0.361111	0.477778	0.477778	0.677778	0.788889
0.738889	0.827778	0.5	0.311111	0.383333	0.683333	0.272222	0.166667	0.472222	0.566667
0.411111	0.994444	0.566667	0.111111	0.766667	0.8	0.344444	0.383333	0.694444	0.733333
0.633333	0.444445	0.65	0.138889	0.566667	0.75	0.322222	0.266667	0.605556	0.511111
	0.466667	0.766667	0.172222	0.377778	0.322222	1.27778	0.983333	0.433333	0.494444
	0.361111	0.561111	0.777778		0.566667	0.855556	1.03333	0.511111	0.755556
	0.483333	0.25	0.622222		0.694444	1.20556	1.54444	0.794444	0.644444
	0.25	0.183333	0.383333			1	0.711111	1.13889	0.655556
	0.261111	0.45	0.333333			0.961111	1.02222	0.794444
	0.372222	0.525	0.466667					0.772222
	0.15	0.75	0.538889					0.661111
	0.183333	0.6	0.308333
		0.194444	0.283333
	0.1	0.727778
	0.177778	0.255556
	0.355556	0.322222
	0.138889
0.437037	0.367901	0.442438	0.366481	0.625397	0.614198	0.670202	0.641919	0.72265	0.666111
0.239151	0.231909	0.214916	0.18295	0.308452	0.171799	0.392517	0.450914	0.198949	0.109602
6	18	18	15	7	9	11	11	13	10

## Sheet: figure Cb
Figure 13Cb source data. Current injection required to elicit a firing event in WT and Pcdhg mutant transplanted cINs.
black trace:			blue trace:
current injection	frequency		current injection	frequency
-30	0		-30	0
-20	0		-20	0
-10	0		-10	0
0	0		0	0
10	0		10	0
20	0		20	0
30	4		30	0
40	20		40	8
50	44		50	22
60	58		60	34

## Sheet: figure Cc
Figure 13Cc source data. WT and Pcdhg mutant transplanted cINs diplay similar firing rates.
8DAT GFP	8DAT RFP	9DAT GFP	9DAT RFP	10DAT GFP	10DAT RFP	11DAT GFP	11DAT RFP	12DAT GFP	12DAT RFP
10	38	46	2	12	8	4	20	20	60
36	50	48	58	16	40	80	66	45	2
2	52	14	38	90	50	20	68	2	70
2	38	45	22	10	30	4	2	2	70
2	46	16	38	50	16	2	24	60	42
58	2	2	16	38	70	30	4	18	18
8	15	30	4	48		90	20	30	2
4	2	50	18			60	8	32	2
50	16	35	70			40	2.5	4	78
14	2	60	50			8	45	2	6
12	2	2	2			90	10	42
60	2	60	2			8		100
	68	2	2
	2	56	34
	12	2	14
	1	62	44
		30	80
		45
		60
21.5	21.75	35	29.0588	37.7143	35.6667	36.3333	24.5	29.75	35
22.8533	22.9681	22.3209	25.101	28.5524	22.7479	34.932	24.4305	29.3013	32.2663
12	16	19	17	7	6	12	11	12	10

## Sheet: figure Db
Figure 13Db source data. Pcdhg deletion does not affect the membrane time constant in transplanted cIN cells.
8DAT GFP	8DAT RFP	9DAT GFP	9DAT RFP	10DAT GFP	10DAT RFP	11DAT GFP	11DAT RFP	12DAT GFP	12DAT RFP
7.132	1.62	20.36	2.16	1.933	21.88	12.0666	10.2968	1.44	7.89
2.6252	2.125	5.843	14.2213	1.46	14.2	18.5947	10.8815	1.21	1.53
1.0188	12.8553	4.51	2.3059	11.66	1.75	10.4361	10.23	4.2748	3.14
4.3643	0.2294	17.968	4.9686	15.9197	4.7959	6.5724	1.5483	7.9534	5.894
	1.04	7.0803	10.2145	13.7621	17.4478	7.2485	1.0192	13.4509	2.4117
	7.2032	14.4486		1.8378	5.8413	1.2862	2.2052	6.0004	10.3746
	2.177	1.9372				2.0448	1.337	1.7445	2.3167
	1.7942	3.3683				5.9579	3.3629	7.51	12.5029
		9.0049				1.1881	6.1196	5.5176
		2.1513					10.4379
3.78507	3.63051	8.66716	6.77406	7.7621	10.9858	7.26614	5.74384	5.45573	5.75749
2.61629	4.27505	6.66975	5.28705	6.73101	8.01065	5.74007	4.30712	3.93703	4.12554
4	8	10	5	6	6	9	10	9	8

## Sheet: figure E
Figure 13E source data. Pcdhg deletion does not affect the capacitance of transplanted cINs.
8DAT GFP	8DAT RFP	9DAT GFP	9DAT RFP	10DAT GFP	10DAT RFP	11DAT GFP	11DAT RFP	12DAT GFP	12DAT RFP
14	8.5	13.33	8.689	21	22	18.48	24.36	21.83	22.82
7.99	7.2	11.89	15.7	14	21	26.49	31.56	22.02	20
8.77	12	16	10.67	20	15	19.23	27.45	25.17	21.16
8.35	9	11.5	15.67	23	18	11.01	24.21	17.03	19.38
16.05	19.73	18	29.7	26.22	22.5	11.43	19.63	24.92	17.54
14.4	25.51	6.5	18.66	17.06	21	27.3	18.98	18.34	13.25
10.92	13.29	20	21.08	19.94	19.33	20.53	25.86	19.04	16.4
10.98	12.8	14.86	13.63		20.93	22.02	27.16	16.02	26.31
12.97	31	16.65	16.58		24.76	17.54	16.36	22.68	29.83
11.43	22.62	12.44	15.94			23.98	27.75	28.81	28.17
	27.45	22.02	7.22			30.67	16.99	20.87	26.87
	24.823	24.84	26.77			25.52	17.22	19.73	32.38
	16.58	21.65	15.31			11	23.98	23.56	27.75
	21.59	12.5	16.61				19.03	19.89
	22.62	24.05	13.22				14.83	22.62
	17.95	22.42
		16.84
		24.28
		16.8
11.586	18.2914	17.1879	16.3633	20.1743	20.5022	20.4	22.358	21.502	23.22
2.74381	7.2737	5.14559	6.02534	3.93961	2.80516	6.46833	5.09103	3.35986	5.79644
10	16	19	15	7	9	13	15	15	13

## Sheet: figure F
Figure 13F source data. Pcdhg deletion does not affect the resistance of transplanted cINs.
8DAT GFP	8DAT RFP	9DAT GFP	9DAT RFP	10DAT GFP	10DAT RFP	11DAT GFP	11DAT RFP	12DAT GFP	12DAT RFP
385	200	450	500	361	240	187	228	378	204
350	400	400	375	330	280	347	357	150	250
350	450	205	450	236	319	358	242	245	363
204	150	464	500	260	336	276	250	238	196
450	200	225	490	274	436	392	476	460	278
350	250	274	475	269	470	245	183	194	475
350	280	325	450	190	300	232	197	187	389
400	450	186	401	238	260	341	220	275	167
350	258	258	275	224.23	150	300	287	374	202
245	274	245	346		290	274	154	243	276
110	250	287	326		192	254	294	222	213
210	175	369	290			255	339	234	309
348	342	304	277			373	296	233	142
342	187	236	239			285	248	201
319	102	228	221				265	300
254	270	98	294
	200	263	265
	306	226	196
	225	275	274
	265	308	271
	237	301	171
	205	219	241
	243	269	194
313.562	257.348	278.913	327	264.692	297.545	294.214	269.067	262.267	266.462
86.5132	87.0969	83.3917	106.546	52.9379	94.2607	59.8809	79.5545	83.5724	96.3463
16	23	23	23	9	11	14	15	15	13
