# Supplementary material for: Clustered gamma-protocadherins regulate cortical interneuron programmed cell death
Source: eLife journal article supplement (doi:10.7554/elife.55374), 2020-07-07

**A***Nkx2.1<sup>Cre</sup>;Ai14**Nkx2.1<sup>Cre</sup>;Ai14;Pcdhg<sup>fcon3/fcon3</sup>*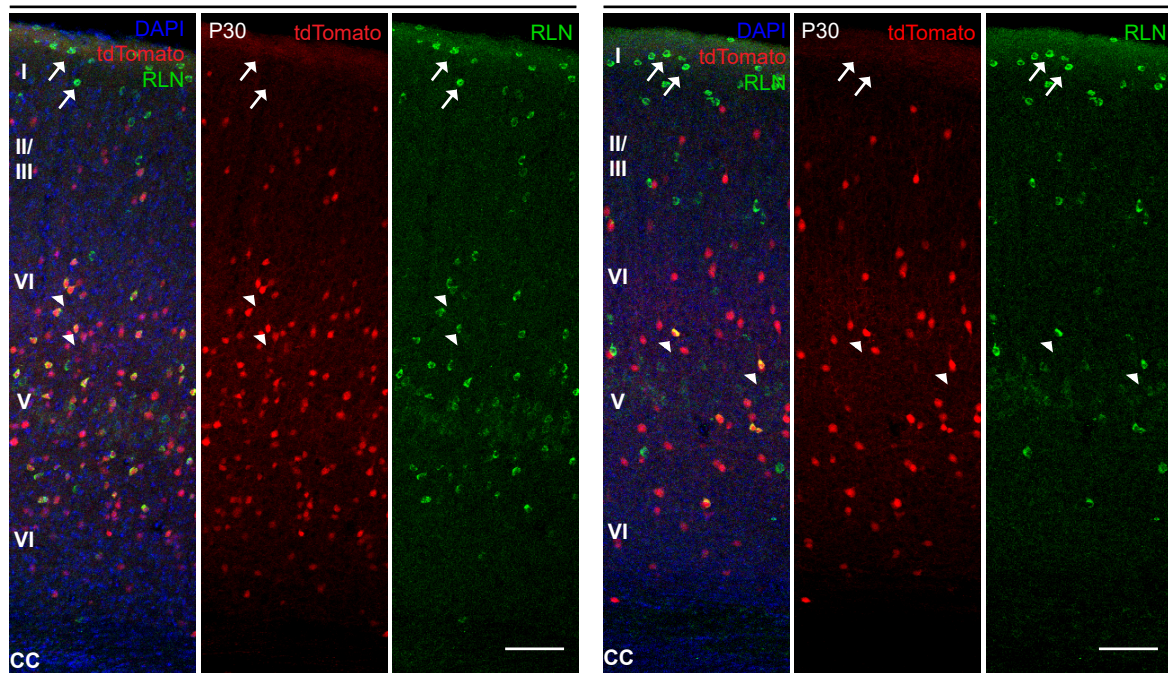**B***Nkx2.1<sup>Cre</sup>;Ai14*; ■ WT ■ *Pcdhg<sup>fcon3/fcon3</sup>*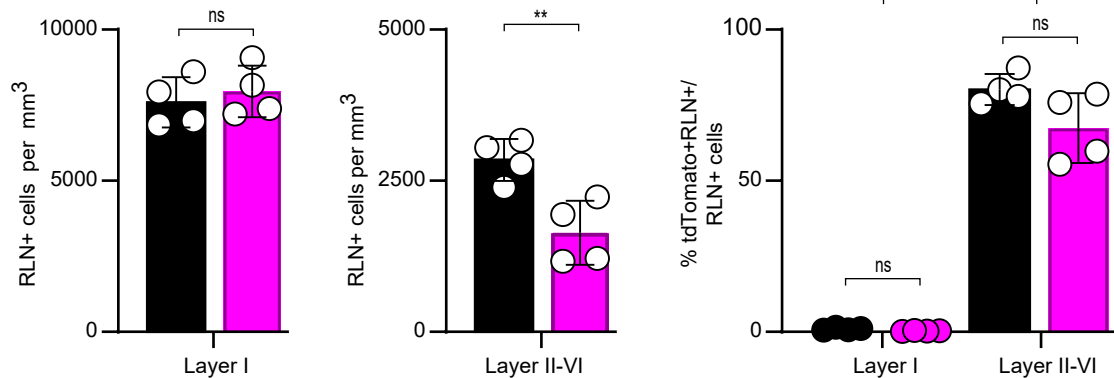

Supplement: supp [file elife-55374-supp-v1.zip]
