# Supplementary figures and images for: Clustered gamma-protocadherins regulate cortical interneuron programmed cell death
Source: eLife journal article supplement (doi:10.7554/elife.55374), 2020-07-07

**A****PV (P30)****SST (P30)***Gad2<sup>Cre</sup>; Ai14;*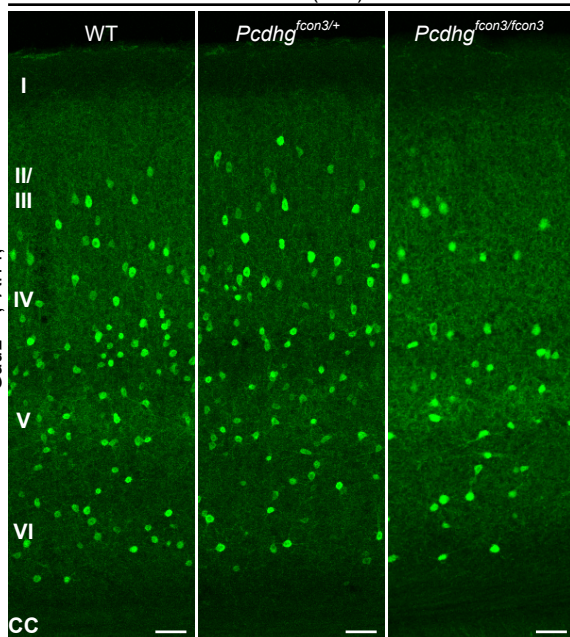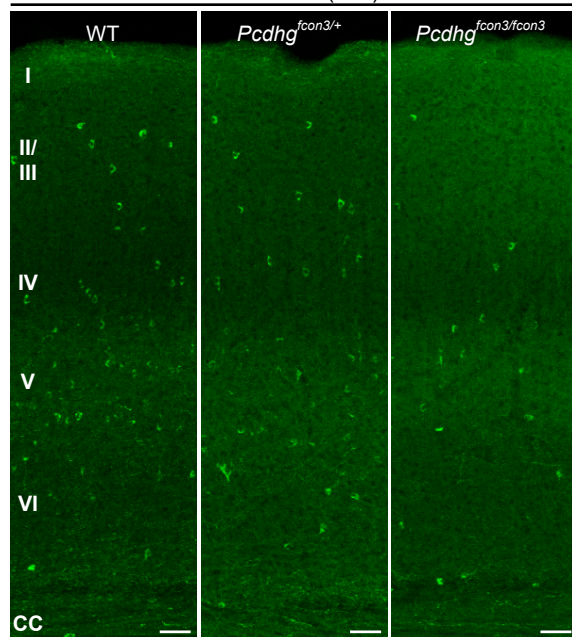**RNL (P30)****VIP (P30)***Gad2<sup>Cre</sup>; Ai14;*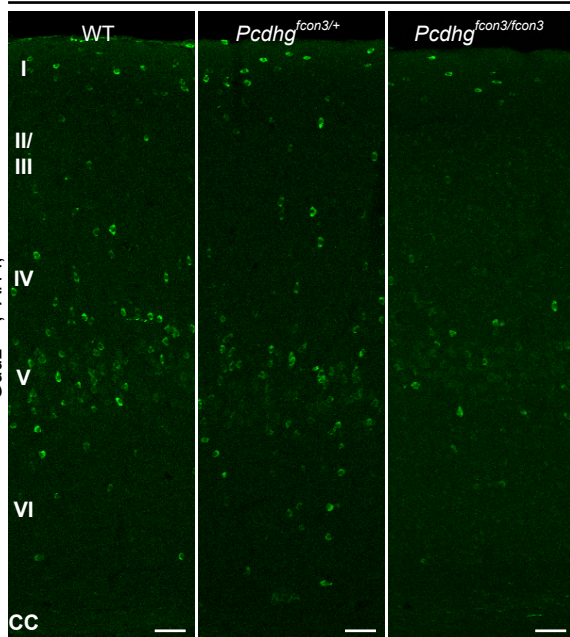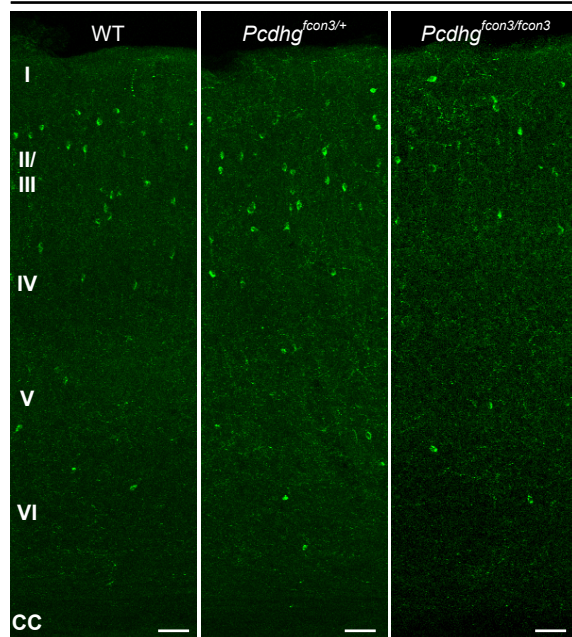

Supplement: supp [file elife-55374-supp-v1.zip]

**A**

■ WT

■ *Pcdhg*<sup>fcon3/fcon3</sup>*Nkx2.1*<sup>Cre</sup>; Ai14;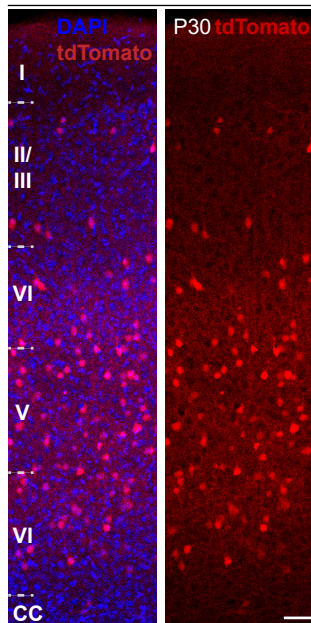*Nkx2.1*<sup>Cre</sup>; Ai14;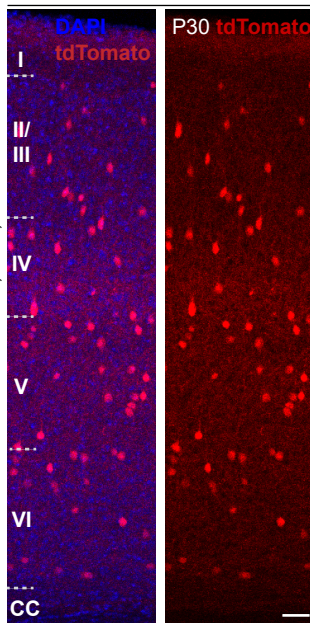**B**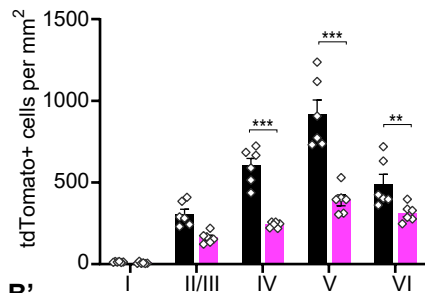**B'**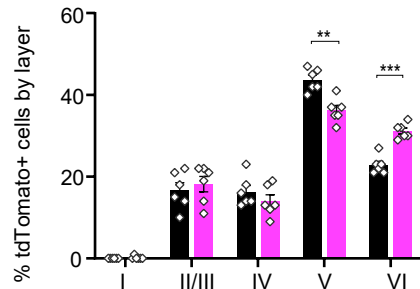

Supplement: supp [file elife-55374-supp-v1.zip]

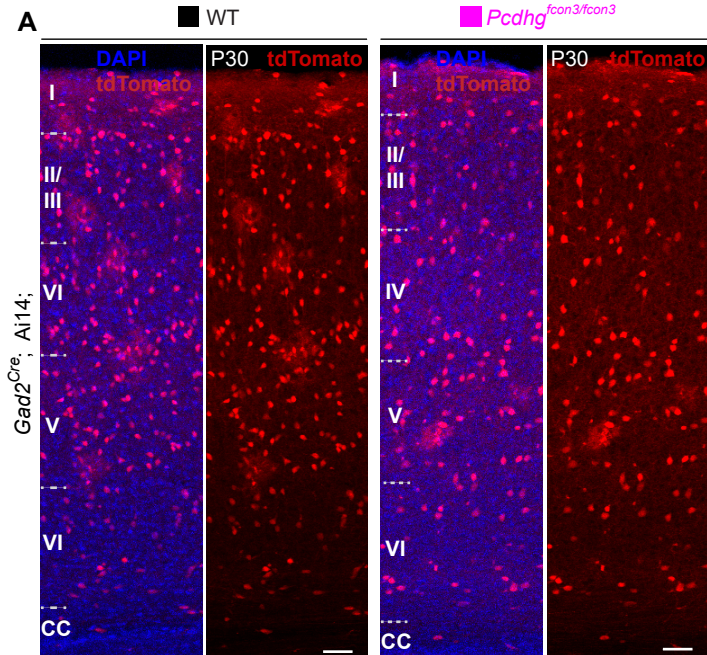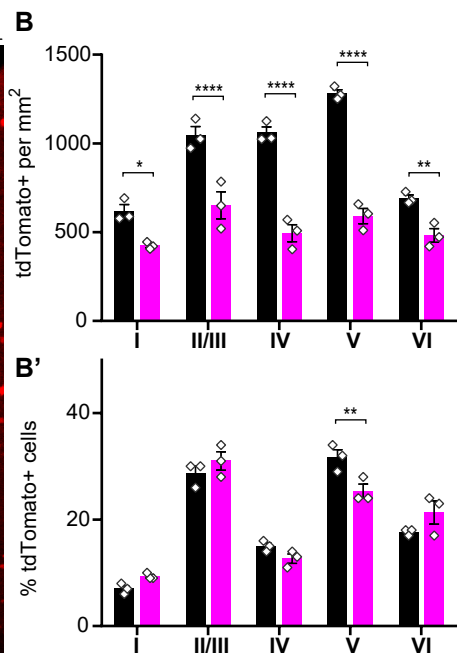

Supplement: supp [file elife-55374-supp-v1.zip]

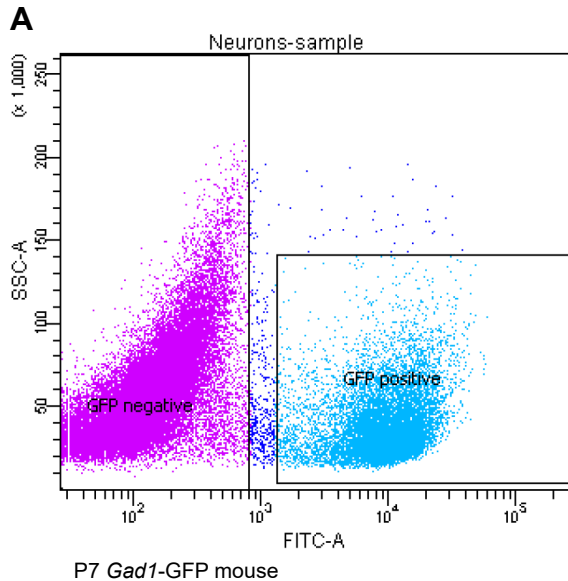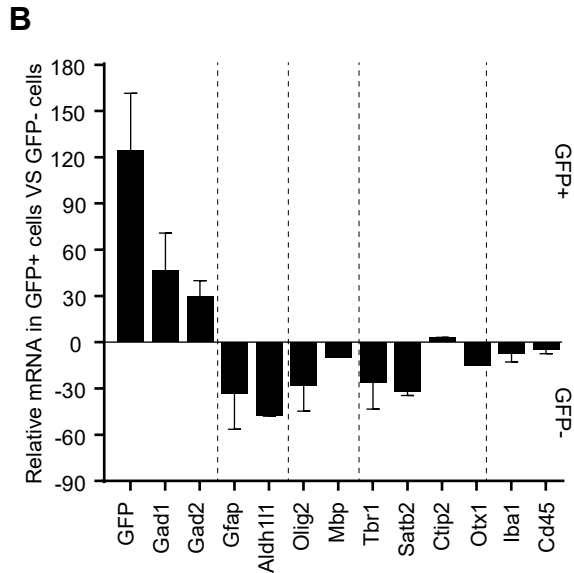

Supplement: supp [file elife-55374-supp-v1.zip]

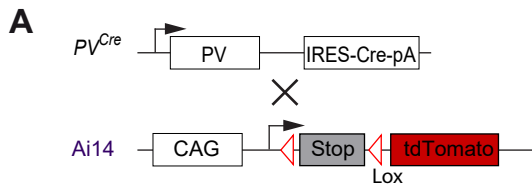

**B**

*PV<sup>Cre</sup>; Ai14*

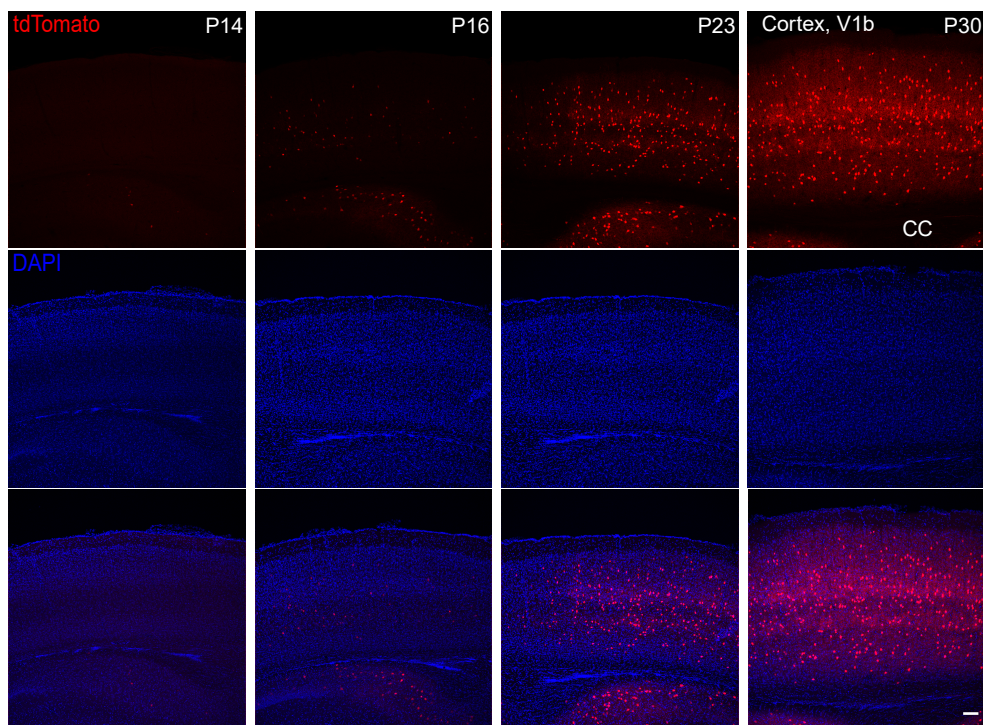

Supplement: supp [file elife-55374-supp-v1.zip]

**A**

■ WT

■ *Pcdhg<sup>fcon3/fcon3</sup>***A'***Nkx2.1<sup>Cre</sup>, Ai14;*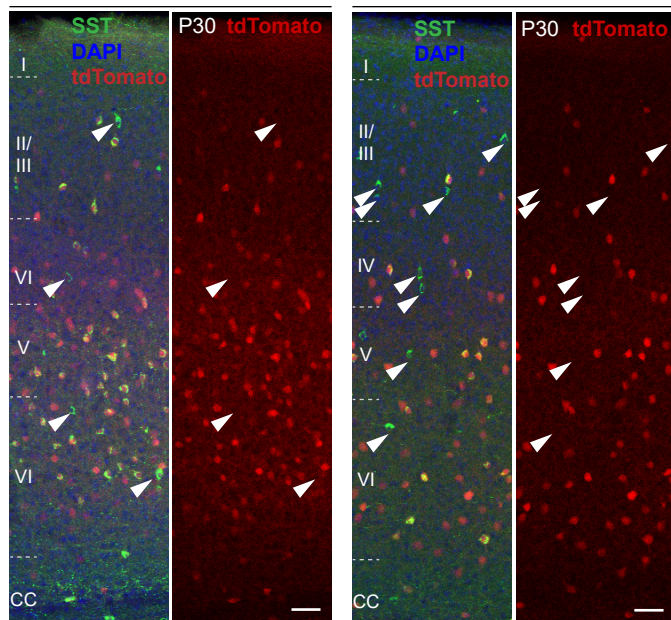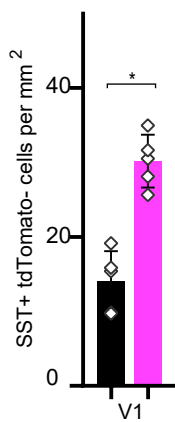**B**

■ WT

■ *Pcdhg<sup>fcon3/fcon3</sup>***B'***Nkx2.1<sup>Cre</sup>, Ai14;*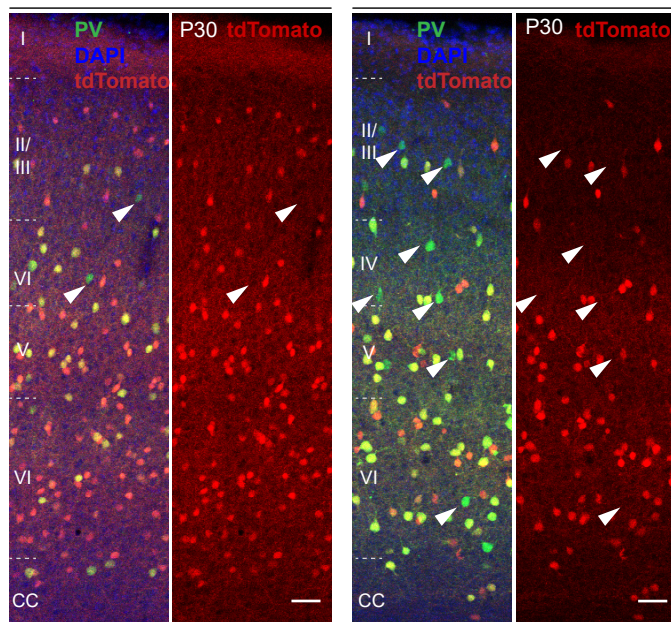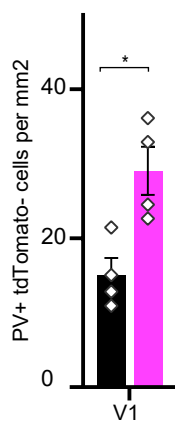

Supplement: supp [file elife-55374-supp-v1.zip]

**A****PV (P30)****SST (P30)***Nkx2.1<sup>Cre</sup>; Ai14;*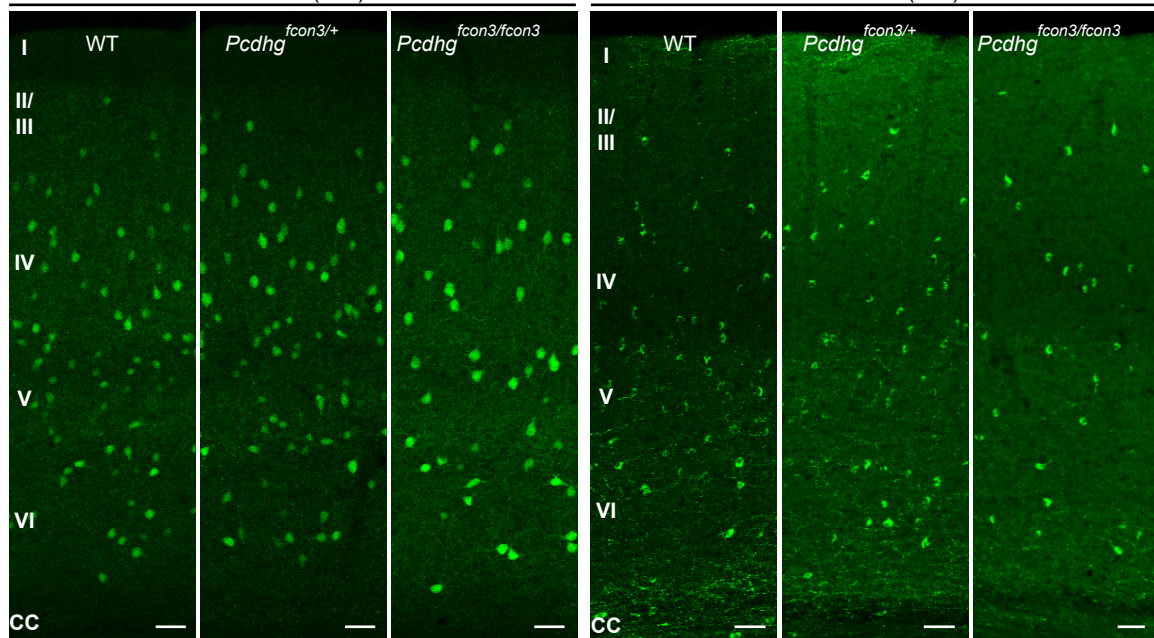**RNL (P30)****VIP (P30)***Nkx2.1<sup>Cre</sup>; Ai14;*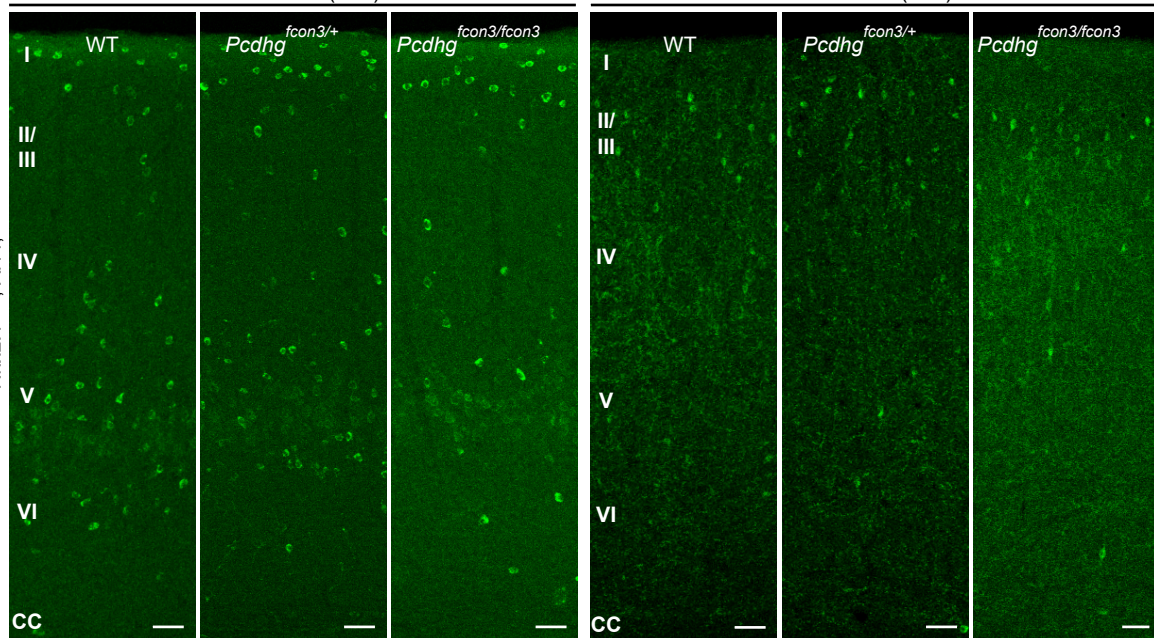

Supplement: supp [file elife-55374-supp-v1.zip]

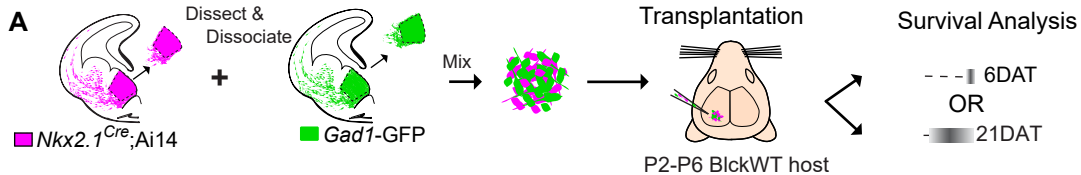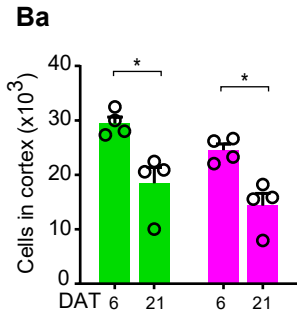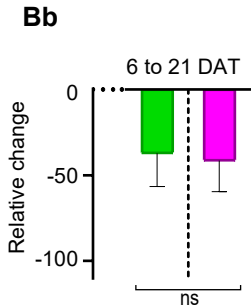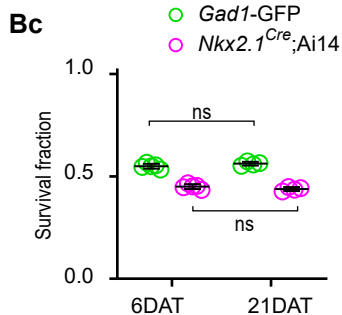

Supplement: supp [file elife-55374-supp-v1.zip]

**A**

■ *Gad1*-GFP  
■ *Nkx2.1*<sup>Cre</sup>;Ai14;*Pcdhg*<sup>fcon3/fcon3</sup>

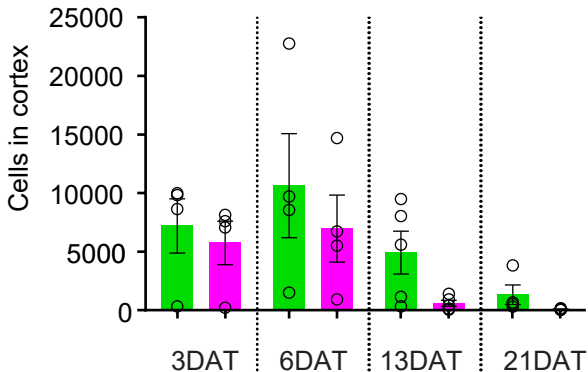

Supplement: supp [file elife-55374-supp-v1.zip]
